# Supplementary material for: Copper-catalyzed decarboxylative ethynyl methylene cyclic carbamates with amines: modular synthesis of 3-aminopyrroles
Source: Royal Society of Chemistry journal article supplement (doi:10.1039/d4nj03137g), 2024-01-01

## Supporting Information

### Copper-Catalyzed Decarboxylative Ethynyl Methylene Cyclic Carbamates with Amines: Modular Synthesis of 3-Aminopyrroles

Jiadong Chen and Shengbiao Tang\*

Jiangsu Key Laboratory of Advanced Catalytic Materials & Technology, School of Petrochemical Engineering, Changzhou University, Changzhou 213164, China

E-mail: [shengbiaotang@cczu.edu.cn](mailto:shengbiaotang@cczu.edu.cn)

#### Table of content

|                                                                   |     |
|-------------------------------------------------------------------|-----|
| General information .....                                         | S2  |
| General procedure for the synthesis of EMCCs ( <b>2</b> ).....    | S2  |
| General procedure for the synthesis of pyrroles ( <b>3</b> )..... | S7  |
| X-ray of compound <b>3aa</b> .....                                | S27 |
| Reference .....                                                   | S30 |
| NMR Spectra.....                                                  | S31 |

## General information

All reactions were carried out using oven-dried glassware with magnetic stirring under argon atmosphere unless otherwise noted. Anhydrous solvents were dried prior to use. Reagents were purchased from Energy Chemical and used without further purification. For column chromatography, 200-300 mesh silica gel was used. Thin layer chromatography (TLC) was performed on Silicycle 250 $\mu$ m silica gel 60Å plates. Visualization was accomplished with UV light (254 nm), Iodine, or Potassium Permanganate. Heating by an oil bath.

$^1\text{H}$  NMR and  $^{13}\text{C}$  NMR spectra were recorded on a Bruker 300 MHz (300 MHz for  $^1\text{H}$ ; 282 MHz for  $^{19}\text{F}$ ; 75 MHz for  $^{13}\text{C}$ ) spectrometers at ambient temperature. The chemical shifts ( $\delta$ ) are given in parts per million relative to  $\text{CDCl}_3$  (7.26 ppm for  $^1\text{H}$ ) or TMS (0 ppm for  $^1\text{H}$ ) and  $\text{CDCl}_3$  (77.16 ppm for  $^{13}\text{C}$ ). Coupling constants ( $J$ ) are reported in Hz, and multiplicity is described using the following abbreviations: s = singlet, d = doublet, t = triplet, q = quartet, m = multiplet, br = broad, or combinations thereof. HRMS were performed on Agilent 6540 Q-TOF mass spectrometer (ESI). Melting points were determined on a SGW X-4B melting point apparatus.

Amines used in this paper are all commercially available, purchased from company and direct use without further treatment. Ethynyl Methylene Cyclic Carbamates (EMCCs) have been prepared according to the reported literatures.<sup>1</sup> All new compounds, include EMCCs, have been characterized by  $^1\text{H}$  NMR,  $^{13}\text{C}$  NMR,  $^{19}\text{F}$  NMR and HRMS.

## General procedure for the synthesis of EMCCs

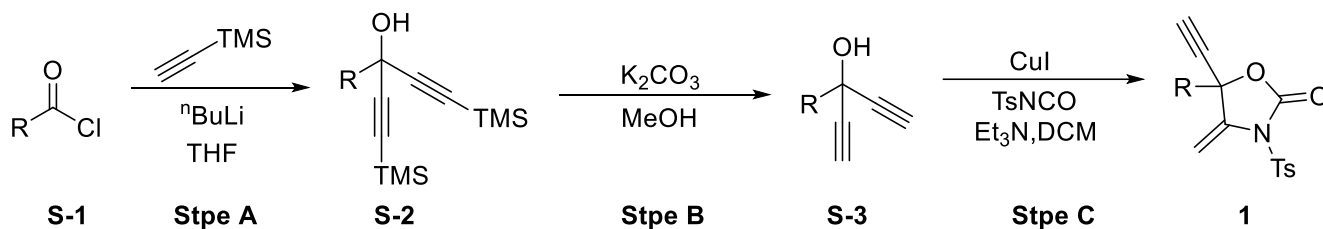

**Step A:** To a solution of trimethylsilyl acetylene (130 mmol, 2.6 equiv.) in THF (100 mL), a solution of  $n\text{-BuLi}$  (50 mL, 2.4 M in hexane, 2.4 equiv.) was added dropwise at  $-78\text{ }^\circ\text{C}$  under argon. The mixtures were then warmed to  $-20\text{ }^\circ\text{C}$  and stirred for additional 30 min. A solution of S-1 (50 mmol, 1.0 equiv.) in THF (10 mL) was then added dropwise. After stirring for 2 h, the reaction mixtures were quenched with aq  $\text{NH}_4\text{Cl}$  at  $-20\text{ }^\circ\text{C}$ . The layers were separated and the aqueous layer was extracted with EAOAc ( $3\times 100$  mL). The combined organic phases were washed with brine ( $3\times 100$  mL) and dried over  $\text{NaSO}_4$ . Removal of the solvent afforded S-2, which was used directly in the next step without further purification.

**Step B:** To the above crude S-2 (50 mmol, 1.0 equiv.), MeOH (100 mL),  $\text{K}_2\text{CO}_3$  (50 mmol, 1.0 equiv.) were added and the solution was stirred continuously for 30 min. After completion of the reaction, the solvent was removed under reduced pressure. The residue was diluted by adding  $\text{H}_2\text{O}$  (100 mL) and then the mixtures were extracted with  $\text{Et}_2\text{O}$  ( $3\times 100$  mL). The combined organic phases were washed with brine ( $3\times 100$  mL) and dried over  $\text{NaSO}_4$ . After concentration, the residue was purified by flash column chromatography to give the desired product S-3, which was used directly in the next step without further purification.

**Step C:** To a 25 mL round-bottomed flask, CuI (0.25 mmol, 47.5 mg 0.05 equiv.) was added under argon, followed by a dry dichloromethane (4 mL) solution of triethylamine (0.6 mmol, 63 mg, 0.12 equiv.) and S-3 (5.0 mmol, 1.0 equiv.). Then a dry dichloromethane (1 mL) solution of TsNCO (5.5 mmol, 1.1 equiv.) was added dropwise to the solution by syringe at  $0\text{ }^\circ\text{C}$ . After being stirred for 2-4 h at room temperature, the reaction was filtered by silica gel. Evaporation of the filtrate left a crude product, which was subjected to column chromatography (EtOAc/hexane, 1: 3-1:10) for product EMCCs 1.

The new EMCCs were listed as follows:

**5-ethynyl-4-methylene-5-(p-tolyl)-3-tosyloxazolidin-2-one (1b)**

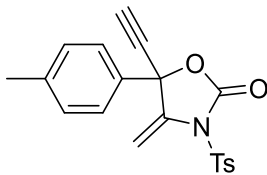

The title compound was prepared through above general procedure. Purified by silica gel column chromatography (eluent: EtOAc/PE = 1:10) furnished **1b** in 67% yield.

**<sup>1</sup>H NMR** (300 MHz, CDCl<sub>3</sub>) δ 7.94 (d, *J* = 8.3 Hz, 2H), 7.34 (dd, *J* = 13.3, 8.0 Hz, 4H), 7.14 (d, *J* = 8.0 Hz, 2H), 5.70 (d, *J* = 3.2 Hz, 1H), 4.71 (d, *J* = 3.2 Hz, 1H), 2.89 (s, 1H), 2.47 (d, *J* = 2.6 Hz, 3H), 2.35 (s, 3H).

**<sup>13</sup>C NMR** (101 MHz, CDCl<sub>3</sub>) δ 149.8, 146.5, 141.6, 140.2, 134.3, 134.2, 130.1, 130.0, 129.5, 128.4, 126.0, 96.0, 80.6, 79.4, 78.4, 21.9, 21.3.

**HRMS** (ESI) *m/z* calculated for C<sub>20</sub>H<sub>18</sub>NO<sub>4</sub>S [M+H]<sup>+</sup> : 368.0951, found: 368.0955.

**5-ethynyl-5-(4-iodophenyl)-4-methylene-3-tosyloxazolidin-2-one (1d)**

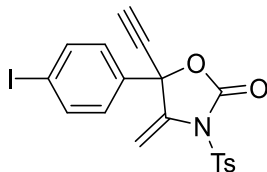

The title compound was prepared through above general procedure. Purified by silica gel column chromatography (eluent: EtOAc/PE = 1:5) furnished **1d** in 70% yield.

**<sup>1</sup>H NMR** (400 MHz, CDCl<sub>3</sub>) δ 7.91 (d, *J* = 8.5 Hz, 2H), 7.66 (d, *J* = 8.5 Hz, 2H), 7.35 (d, *J* = 8.1 Hz, 2H), 7.15 (d, *J* = 8.5 Hz, 2H), 5.72 (d, *J* = 3.4 Hz, 1H), 4.75 (d, *J* = 3.4 Hz, 1H), 2.94 (s, 1H), 2.48 (s, 3H).

**<sup>13</sup>C NMR** (101 MHz, CDCl<sub>3</sub>) δ 149.5, 146.7, 140.9, 138.0, 137.0, 133.8, 130.1, 128.3, 127.7, 96.5, 96.4, 80.0, 79.0, 78.6, 22.0.

**HRMS** (ESI) *m/z* calculated for C<sub>19</sub>H<sub>15</sub>INO<sub>4</sub>S [M+H]<sup>+</sup> : 479.9761, found: 479.9766.

**5-(4-chlorophenyl)-5-ethynyl-4-methylene-3-tosyloxazolidin-2-one (1e)**

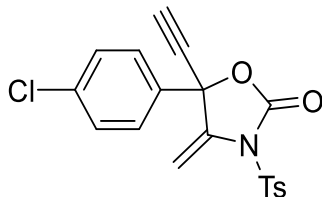

The title compound was prepared through above general procedure. Purified by silica gel column chromatography (eluent: EtOAc/PE = 1:5) furnished **1e** in 65% yield.

**<sup>1</sup>H NMR** (300 MHz, CDCl<sub>3</sub>) δ 7.92 (d, *J* = 8.5 Hz, 2H), 7.34 (m, 6H), 5.73 (s, 1H), 4.75 (s, 1H), 2.94 (s, 1H), 2.47 (s, 3H).

**<sup>13</sup>C NMR** (75 MHz, CDCl<sub>3</sub>) δ 149.5, 146.7, 141.0, 136.2, 135.7, 133.9, 130.1, 129.1, 128.3, 127.4, 96.5, 79.8, 79.0, 78.8, 21.9.

**HRMS** (ESI) *m/z* calculated for C<sub>19</sub>H<sub>15</sub>ClNO<sub>4</sub>S [M+H]<sup>+</sup> : 388.0405, found: 388.0407.

**5-ethynyl-4-methylene-5-(naphthalen-1-yl)-3-tosyloxazolidin-2-one (1l)**

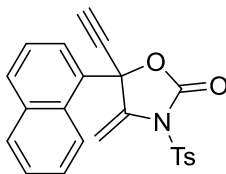

The title compound was prepared through above general procedure. Purified by silica gel column chromatography (eluent: EtOAc/PE = 1:6) furnished **1l** in 58% yield.

**<sup>1</sup>H NMR** (300 MHz, CDCl<sub>3</sub>) δ 7.99 (dd, *J* = 8.5, 1.7 Hz, 3H), 7.91-7.81 (m, 3H), 7.47 (ddd, *J* = 8.1, 6.8, 1.2 Hz, 1H), 7.41-7.29 (m, 4H), 5.90 (d, *J* = 3.2 Hz, 1H), 4.89 (d, *J* = 3.2 Hz, 1H), 2.98 (s, 1H), 2.44 (s, 3H).

**<sup>13</sup>C NMR** (75 MHz, CDCl<sub>3</sub>) δ 149.5, 146.6, 139.8, 134.7, 134.0, 131.9, 130.5, 130.1, 129.9, 129.2, 128.5, 126.7, 126.3, 126.3, 125.2, 124.3, 97.7, 81.7, 79.9, 79.7, 21.9.

**HRMS** (ESI) *m/z* calculated for C<sub>23</sub>H<sub>18</sub>NO<sub>4</sub>S [M+H]<sup>+</sup> : 404.0951, found: 404.0958.

**5-cyclopropyl-5-ethynyl-4-methylene-3-tosyloxazolidin-2-one (1q)**

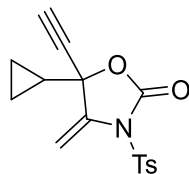

The title compound was prepared through above general procedure. Purified by silica gel column chromatography (eluent: EtOAc/PE = 1:10) furnished **1q** in 55% yield.

**<sup>1</sup>H NMR** (400 MHz, CDCl<sub>3</sub>) δ 8.00-7.91 (m, 2H), 7.41-7.33 (m, 2H), 5.62 (d, *J* = 3.0 Hz, 1H), 4.86 (d, *J* = 3.0 Hz, 1H), 2.64 (s, 1H), 2.46 (s, 3H), 1.26 (tt, *J* = 8.0, 5.2 Hz, 1H), 0.78-0.50 (m, 4H).

**<sup>13</sup>C NMR** (101 MHz, CDCl<sub>3</sub>) δ 149.7, 146.5, 140.8, 134.1, 130.0, 128.3, 93.8, 81.9, 77.0, 21.9, 19.7, 2.9, 1.9.

**HRMS** (ESI) *m/z* calculated for C<sub>16</sub>H<sub>16</sub>NO<sub>4</sub>S [M+H]<sup>+</sup> : 318.0795, found: 318.0791.

**5-ethynyl-5-methyl-4-methylene-3-tosyloxazolidin-2-one (1r)**

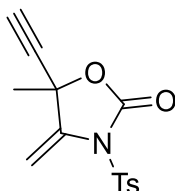

The title compound was prepared through above general procedure. Purified by silica gel column chromatography (eluent: EtOAc/PE = 1:10) furnished **1r** in 50% yield.

**<sup>1</sup>H NMR** (400 MHz, CDCl<sub>3</sub>) δ 8.02-7.85 (m, 2H), 7.38 (d, *J* = 8.1 Hz, 2H), 5.62 (d, *J* = 3.3 Hz, 1H), 4.81 (d, *J* = 3.2 Hz, 1H), 2.72 (s, 1H), 2.46 (s, 3H), 1.72 (s, 3H).

**<sup>13</sup>C NMR** (101 MHz, CDCl<sub>3</sub>) δ 149.5, 146.6, 141.5, 133.9, 130.0, 128.2, 93.0, 80.0, 76.6, 76.1, 29.0, 21.8.

**HRMS** (ESI) *m/z* calculated for C<sub>14</sub>H<sub>14</sub>NO<sub>4</sub>S [M+H]<sup>+</sup> : 292.0638, found: 292.0635.

**5-ethyl-5-ethynyl-4-methylene-3-tosyloxazolidin-2-one (1s)**

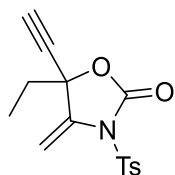

The title compound was prepared through above general procedure. Purified by silica gel column chromatography (eluent: EtOAc/PE = 1:5) furnished **1s** in 67% yield.

**<sup>1</sup>H NMR** (300 MHz, CDCl<sub>3</sub>) δ 8.00-7.88 (m, 2H), 7.37 (d, *J* = 8.1 Hz, 2H), 5.65 (d, *J* = 3.2 Hz, 1H), 4.76 (d, *J* = 3.2 Hz, 1H), 2.73 (s, 1H), 2.45 (s, 3H), 1.91 (ddt, *J* = 24.7, 14.4, 7.2 Hz, 2H), 0.93 (t, *J* = 7.3 Hz, 3H).

**<sup>13</sup>C NMR** (75 MHz, CDCl<sub>3</sub>) δ 149.7, 146.5, 140.2, 134.0, 130.0, 128.2, 93.1, 80.0, 79.2, 76.6, 35.1, 21.8, 7.3.

**HRMS** (ESI) *m/z* calculated for C<sub>15</sub>H<sub>16</sub>NO<sub>4</sub>S [M+H]<sup>+</sup> : 306.0795, found: 306.0791.

### General procedure for the synthesis of 3-aminopyrroles (3aa-3as)

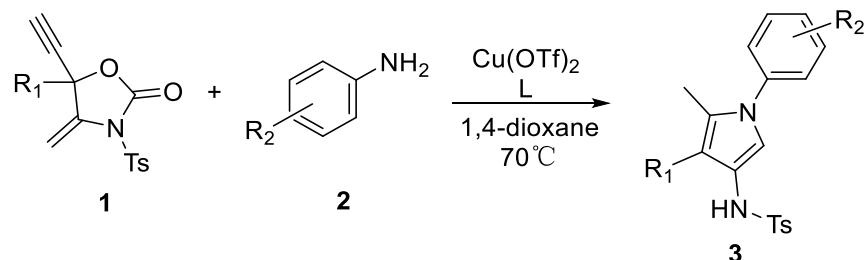

**General procedure A:** To a flame dried tube was cooled to rt. and charged with Cu(OTf)<sub>2</sub> (4.0 mg, 0.01mmol, 5 mol%) and L1 (4.0 mg, 0.01mmol, 5 mol%). The tube was added freshly distilled 1,4-dioxane (1.0 mL), and stirred at rt. for 20 min. The compound **1** (0.2 mmol, 1 equiv.), amine **2** (0.3 mmol, 1.5 equiv.) were added and the mixtures were then heated to 70 °C for 5 h. After completion of the reaction, the reaction mixture was concentrated and purified by flash column chromatography using (1:3 ethyl acetate/hexanes) to give the desired product **3aa-3as**.

### *N*-(1-(4-methoxyphenyl)-5-methyl-4-phenyl-1H-pyrrol-3-yl)-4-methylbenzenesulfonamide (**3aa**)

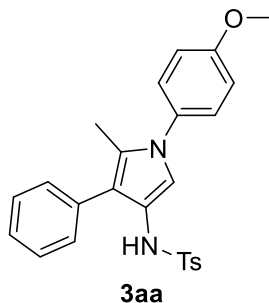

The title compound was prepared from **1a** (76.6 mg, 0.2 mmol, 1 eq.) and **2a** (36.9 mg, 0.3 mmol, 1.5 eq.) via general procedure. Purified by silica gel column chromatography (eluent: EtOAc/PE = 1:3) furnished **3aa** (77.7 mg, 90% yield) as colorless solid.

**<sup>1</sup>H NMR** (400 MHz, CDCl<sub>3</sub>) δ 7.51 (d, *J* = 8.3 Hz, 2H), 7.26-7.19 (m, 4H), 7.13 (d, *J* = 8.0 Hz, 2H), 6.95 (d, *J* = 8.8 Hz, 2H), 6.90-6.82 (m, 3H), 6.14 (s, 1H), 3.85 (s, 3H), 2.38 (s, 3H), 2.00 (s, 3H).

**<sup>13</sup>C NMR** (101 MHz, CDCl<sub>3</sub>) δ 158.8, 143.3, 136.4, 133.6, 132.7, 129.7, 129.4, 128.6, 127.4, 127.3, 126.5, 125.2, 118.1, 115.8, 114.4, 55.7, 21.7, 11.5.

**HRMS** (ESI)  $m/z$  calculated for  $C_{25}H_{25}N_2O_3S$   $[M+H]^+$ : 433.1580, found: 433.1582.

*N*-(1-(4-methoxyphenyl)-5-methyl-4-(*p*-tolyl)-1*H*-pyrrol-3-yl)-4-methylbenzenesulfonamide (**3ba**)

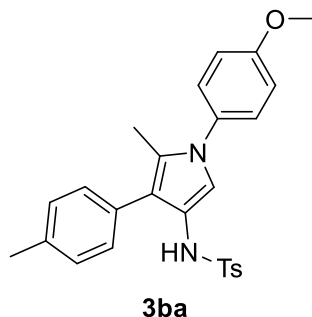

The title compound was prepared from **1b** (73.4 mg, 0.2 mmol, 1 eq.) and **2a** (36.9 mg, 0.3 mmol, 1.5 eq.) via general procedure. Purified by silica gel column chromatography (eluent: EtOAc/PE = 1:3) furnished **3ba** (74 mg, 83% yield) as colorless solid.

**<sup>1</sup>H NMR** (300 MHz,  $CDCl_3$ )  $\delta$  7.59-7.49 (m, 2H), 7.24-7.18 (m, 2H), 7.14 (d,  $J = 7.9$  Hz, 2H), 7.08 (d,  $J = 7.6$  Hz, 2H), 6.98-6.91 (m, 2H), 6.84 (s, 1H), 6.81-6.71 (m, 2H), 6.13 (s, 1H), 3.84 (s, 3H), 2.37 (d,  $J = 11.4$  Hz, 6H), 1.99 (s, 3H).

**<sup>13</sup>C NMR** (75 MHz,  $CDCl_3$ )  $\delta$  158.7, 143.3, 136.4, 136.0, 132.8, 130.4, 129.5, 129.4, 129.3, 127.4, 127.2, 125.1, 118.2, 117.8, 115.4, 114.3, 55.6, 21.7, 21.3, 11.5.

**HRMS** (ESI)  $m/z$  calculated for  $C_{26}H_{26}N_2O_3S$   $[M+H]^+$ : 447.1713, found: 447.1715.

*N*-(4-(4-(*tert*-butyl)phenyl)-1-(4-methoxyphenyl)-5-methyl-1*H*-pyrrol-3-yl)-4-methylbenzenesulfonamide (**3ca**)

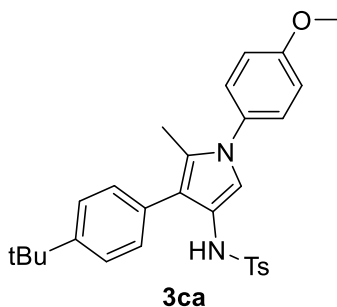

The title compound was prepared from **1c** (81.8 mg, 0.2 mmol, 1 eq.) and **2a** (36.9 mg, 0.3 mmol, 1.5 eq.) via general procedure. Purified by silica gel column chromatography (eluent: EtOAc/PE = 1:3) furnished **3ca** (83.0mg, 85% yield) as colorless solid.

**<sup>1</sup>H NMR** (300 MHz,  $CDCl_3$ )  $\delta$  7.52 (d,  $J = 7.9$  Hz, 2H), 7.31-7.08 (m, 6H), 6.95 (d,  $J = 8.3$  Hz, 2H), 6.89-6.71 (m, 3H), 6.19 (s, 1H), 3.84 (s, 3H), 2.38 (s, 3H), 2.00 (s, 3H), 1.34 (s, 9H).

**<sup>13</sup>C NMR** (75 MHz,  $CDCl_3$ )  $\delta$  158.7, 149.1, 143.2, 136.3, 132.8, 130.4, 129.3, 129.2, 127.3, 127.2, 125.4, 125.1, 118.2, 117.7, 115.5, 114.3, 55.6, 34.5, 31.5, 21.7, 11.5.

**HRMS** (ESI)  $m/z$  calculated for  $C_{29}H_{33}N_2O_3S$   $[M+H]^+$ :489.2206, found: 489.2208.



*N*-(4-(4-iodophenyl)-1-(4-methoxyphenyl)-5-methyl-1*H*-pyrrol-3-yl)-4-methylbenzenesulfonamide  
(3da)

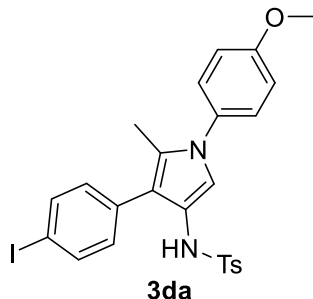

The title compound was prepared from **1d** (95.8 mg, 0.2 mmol, 1 eq.) and **2a** (36.9 mg, 0.3 mmol, 1.5 eq.) via general procedure. Purified by silica gel column chromatography (eluent: EtOAc/PE = 1:3) furnished **3da** (93.7mg, 84% yield) as colorless solid.

<sup>1</sup>H NMR (400 MHz, CDCl<sub>3</sub>) δ 7.55 (d, *J* = 8.2 Hz, 2H), 7.50 (d, *J* = 8.0 Hz, 2H), 7.20 (d, *J* = 8.8 Hz, 2H), 7.12 (d, *J* = 8.0 Hz, 2H), 6.95 (d, *J* = 8.8 Hz, 2H), 6.81 (s, 1H), 6.64 (d, *J* = 8.3 Hz, 2H), 6.16 (s, 1H), 3.85 (s, 3H), 2.41 (s, 3H), 1.98 (s, 3H).

<sup>13</sup>C NMR (75 MHz, CDCl<sub>3</sub>) δ 158.9, 143.5, 137.5, 136.4, 133.3, 132.5, 131.5, 129.4, 127.3, 127.3, 125.4, 117.8, 117.6, 117.4, 114.4, 91.7, 55.7, 21.7, 11.5.

HRMS (ESI) *m/z* calculated for C<sub>25</sub>H<sub>24</sub>IN<sub>2</sub>O<sub>3</sub>S [M+H]<sup>+</sup>: 559.0547, found: 559.0548.

*N*-(4-(4-chlorophenyl)-1-(4-methoxyphenyl)-5-methyl-1*H*-pyrrol-3-yl)-4-methylbenzenesulfonamide  
(3ea)

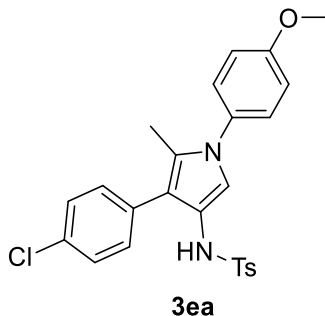

The title compound was prepared from **1e** (77.4 mg, 0.2 mmol, 1 eq.) and **2a** (36.9 mg, 0.3 mmol, 1.5 eq.) via general procedure. Purified by silica gel column chromatography (eluent: EtOAc/PE = 1:3) furnished **3ea** (76.4mg, 82% yield) as colorless solid.

<sup>1</sup>H NMR (300 MHz, CDCl<sub>3</sub>) δ 7.51 (d, *J* = 7.9 Hz, 2H), 7.15 (dd, *J* = 23.9, 8.0 Hz, 6H), 6.95 (d, *J* = 8.4 Hz, 2H), 6.85 (d, *J* = 8.0 Hz, 2H), 6.78 (s, 1H), 6.33 (s, 1H), 3.84 (s, 3H), 2.39 (s, 3H), 1.98 (s, 3H).

<sup>13</sup>C NMR (75 MHz, CDCl<sub>3</sub>) δ 158.9, 143.4, 136.5, 132.5, 132.2, 132.1, 130.9, 129.3, 128.5, 127.3, 127.2, 125.4, 117.8, 117.5, 117.4, 114.3, 55.6, 21.6, 11.5.

**HRMS** (ESI)  $m/z$  calculated for  $C_{25}H_{24}ClN_2O_3S$   $[M+H]^+$ : 467.1191, found: 467.1193.

***N*-(4-(4-fluorophenyl)-1-(4-methoxyphenyl)-5-methyl-1*H*-pyrrol-3-yl)-4-methylbenzenesulfonamide (3fa)**

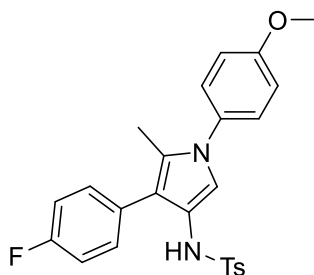

**3fa**

The title compound was prepared from **1f** (74.2 mg, 0.2 mmol, 1 eq.) and **2a** (36.9 mg, 0.3 mmol, 1.5 eq.) via general procedure. Purified by silica gel column chromatography (eluent: EtOAc/PE = 1:3) furnished **3fa** (72.0mg, 80% yield) as colorless solid.

**<sup>1</sup>H NMR** (300 MHz,  $CDCl_3$ )  $\delta$  7.52 (d,  $J = 8.0$  Hz, 2H), 7.16 (dd,  $J = 18.6, 8.4$  Hz, 4H), 6.99-6.81 (m, 6H), 6.78 (s, 1H), 6.25 (s, 1H), 3.84 (s, 3H), 2.39 (s, 3H), 1.98 (s, 3H).

**<sup>13</sup>C NMR** (75 MHz,  $CDCl_3$ )  $\delta$  161.6 (d,  $J = 246.1$  Hz), 158.8, 143.4, 136.5, 132.6, 131.2 (d,  $J = 7.8$  Hz), 129.5, 129.4, 127.4, 127.2, 125.3, 117.7 (d,  $J = 5.9$  Hz), 116.7, 115.3 (d,  $J = 21.3$  Hz), 114.3, 55.7, 21.6, 11.4.

**<sup>19</sup>F NMR** (282 MHz,  $CDCl_3$ )  $\delta$  -116.28.

**HRMS** (ESI)  $m/z$  calculated for  $C_{25}H_{24}FN_2O_3S$   $[M+H]^+$ : 451.1486, found: 451.1484.

***N*-(1-(4-methoxyphenyl)-5-methyl-4-(4-(trifluoromethyl)phenyl)-1*H*-pyrrol-3-yl)-4-methylbenzenesulfonamide (3ga)**

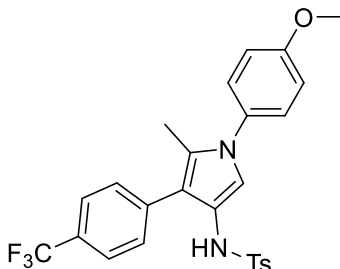

**3ga**

The title compound was prepared from **1g** (84.2 mg, 0.2 mmol, 1 eq.) and **2a** (36.9 mg, 0.3 mmol, 1.5 eq.) via general procedure. Purified by silica gel column chromatography (eluent: EtOAc/PE = 1:3) furnished **3ga** (75.0mg, 75% yield) as colorless solid.

**<sup>1</sup>H NMR** (300 MHz,  $CDCl_3$ )  $\delta$  7.52-7.43 (m, 4H), 7.24-7.18 (m, 2H), 7.05 (dd,  $J = 8.2, 2.7$  Hz, 4H), 7.01-6.93 (m, 2H), 6.82 (s, 1H), 6.41 (s, 1H), 3.85 (s, 3H), 2.36 (s, 3H), 2.01 (s, 3H).

$^{13}\text{C}$  NMR (75 MHz,  $\text{CDCl}_3$ )  $\delta$  159.0, 143.4, 137.7, 136.3, 132.3, 129.7, 129.3, 127.9 (q,  $J = 32.3$  Hz), 127.3, 127.3, 125.9, 125.2 (q,  $J = 3.8$  Hz), 124.45 (q,  $J = 271.9$  Hz), 118.6, 118.1, 117.2, 114.4, 55.6, 21.5, 11.6.

$^{19}\text{F}$  NMR (282 MHz,  $\text{CDCl}_3$ )  $\delta$  -62.26.

HRMS (ESI)  $m/z$  calculated for  $\text{C}_{26}\text{H}_{24}\text{F}_3\text{N}_2\text{O}_3\text{S}$   $[\text{M}+\text{H}]^+$ : 501.1454, found: 501.1456.

*N*-(4-(2-bromophenyl)-1-(4-methoxyphenyl)-5-methyl-1H-pyrrol-3-yl)-4-methylbenzenesulfonamide (**3ha**)

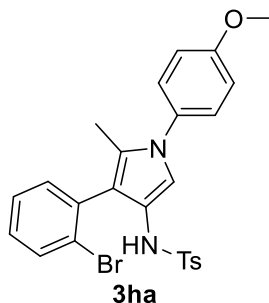

The title compound was prepared from **1h** (86.2 mg, 0.2 mmol, 1 eq.) and **2a** (36.9 mg, 0.3 mmol, 1.5 eq.) via general procedure. Purified by silica gel column chromatography (eluent: EtOAc/PE = 1:3) furnished **3ha** (84.7mg, 83% yield) as colorless solid.

$^1\text{H}$  NMR (300 MHz,  $\text{CDCl}_3$ )  $\delta$  7.59-7.50 (m, 1H), 7.48-7.40 (m, 2H), 7.29-7.19 (m, 2H), 7.15-7.03 (m, 4H), 7.00-6.87 (m, 3H), 6.65-6.57 (m, 1H), 6.07 (s, 1H), 3.85 (s, 3H), 2.37 (s, 3H), 1.89 (s, 3H).

$^{13}\text{C}$  NMR (75 MHz,  $\text{CDCl}_3$ )  $\delta$  158.8, 143.1, 136.5, 134.6, 132.9, 132.7, 132.6, 129.4, 128.6, 127.2, 127.1, 125.9, 124.9, 118.1, 117.9, 117.1, 114.3, 76.7, 55.7, 21.6, 11.6.

HRMS (ESI)  $m/z$  calculated for  $\text{C}_{25}\text{H}_{24}\text{BrN}_2\text{O}_3\text{S}$   $[\text{M}+\text{H}]^+$ : 511.0686, found: 511.0687.

*N*-(1-(4-methoxyphenyl)-5-methyl-4-(*o*-tolyl)-1H-pyrrol-3-yl)-4-methylbenzenesulfonamide (**3ia**)

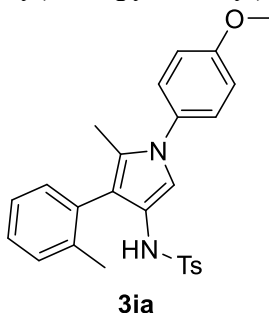

The title compound was prepared from **1i** (73.4 mg, 0.2 mmol, 1 eq.) and **2a** (36.9 mg, 0.3 mmol, 1.5 eq.) via general procedure. Purified by silica gel column chromatography (eluent: EtOAc/PE = 1:3) furnished **3ia** (77.6mg, 87% yield) as colorless solid.

$^1\text{H}$  NMR (300 MHz,  $\text{CDCl}_3$ )  $\delta$  7.55-7.44 (m, 2H), 7.24-7.13 (m, 6H), 7.06 (td,  $J = 6.8, 6.2, 2.5$  Hz, 1H), 6.99-6.90 (m, 3H), 6.66-6.59 (m, 1H), 5.90 (s, 1H), 3.85 (s, 3H), 2.40 (s, 3H), 1.84 (d,  $J = 10.9$  Hz, 6H).

$^{13}\text{C}$  NMR (75 MHz,  $\text{CDCl}_3$ )  $\delta$  158.6, 143.3, 138.0, 136.3, 132.9, 132.4, 131.2, 130.2, 129.4, 127.6, 127.4, 127.1, 125.8, 125.0, 118.7, 116.6, 114.3, 114.2, 55.6, 21.6, 19.6, 11.5.

HRMS (ESI)  $m/z$  calculated for  $\text{C}_{26}\text{H}_{27}\text{N}_2\text{O}_3\text{S}$   $[\text{M}+\text{H}]^+$ : 447.1737, found: 447.1735.

*N*-(1-(4-methoxyphenyl)-5-methyl-4-(*m*-tolyl)-1*H*-pyrrol-3-yl)-4-methylbenzenesulfonamide (**3ja**)

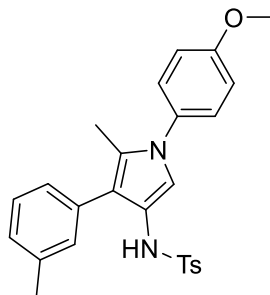

**3ja**

The title compound was prepared from **1j** (73.4 mg, 0.2 mmol, 1 eq.) and **2a** (36.9 mg, 0.3 mmol, 1.5 eq.) via general procedure. Purified by silica gel column chromatography (eluent: EtOAc/PE = 1:3) furnished **3ja** (80.3mg, 90% yield) as colorless solid.

$^1\text{H}$  NMR (300 MHz,  $\text{CDCl}_3$ )  $\delta$  7.53 (d,  $J = 7.9$  Hz, 2H), 7.18 (dd,  $J = 20.5, 8.3$  Hz, 5H), 7.07-6.85 (m, 4H), 6.70 (d,  $J = 7.5$  Hz, 1H), 6.58 (s, 1H), 6.20 (s, 1H), 3.84 (s, 3H), 2.33 (d,  $J = 32.9$  Hz, 6H), 1.99 (s, 3H).

$^{13}\text{C}$  NMR (75 MHz,  $\text{CDCl}_3$ )  $\delta$  158.7, 143.2, 138.0, 136.4, 133.4, 132.7, 130.2, 129.4, 128.4, 127.3, 127.2, 127.2, 126.7, 125.1, 118.1, 118.0, 115.6, 114.3, 55.6, 21.6, 21.5, 11.5.

HRMS (ESI)  $m/z$  calculated for  $\text{C}_{26}\text{H}_{27}\text{N}_2\text{O}_3\text{S}$   $[\text{M}+\text{H}]^+$ : 447.1737, found: 447.1735.

*N*-(1-(4-methoxyphenyl)-5-methyl-4-(3-(trifluoromethyl)phenyl)-1*H*-pyrrol-3-yl)-4-methylbenzenesulfonamide (**3ka**)

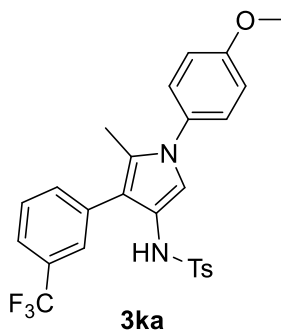

**3ka**

The title compound was prepared from **1k** (84.2 mg, 0.2 mmol, 1 eq.) and **2a** (36.9 mg, 0.3 mmol, 1.5 eq.) via general procedure. Purified by silica gel column chromatography (eluent: EtOAc/PE = 1:3) furnished **3ka** (80.1mg, 80% yield) as colorless solid.

$^1\text{H}$  NMR (300 MHz,  $\text{CDCl}_3$ )  $\delta$  7.54-7.35 (m, 4H), 7.25-7.16 (m, 3H), 7.14-7.04 (m, 3H), 7.02-6.92 (m, 2H), 6.87 (s, 1H), 6.23 (s, 1H), 3.85 (s, 3H), 2.36 (s, 3H), 2.00 (s, 3H).

$^{13}\text{C}$  NMR (75 MHz,  $\text{CDCl}_3$ )  $\delta$  159.0, 143.5, 136.3, 134.6, 133.0, 132.5, 130.6 (q,  $J = 32.1$  Hz), 129.4, 128.9, 127.3, 127.3, 126.1 (q,  $J = 3.9$  Hz), 125.8, 124.19 (q,  $J = 272.5$  Hz), 123.0 (q,  $J = 3.8$  Hz), 117.8, 117.6, 117.4, 114.4, 55.7, 21.5, 11.5.

$^{19}\text{F}$  NMR (282 MHz,  $\text{CDCl}_3$ )  $\delta$  -62.39.

HRMS (ESI)  $m/z$  calculated for  $\text{C}_{26}\text{H}_{24}\text{F}_3\text{N}_2\text{O}_3\text{S}$   $[\text{M}+\text{H}]^+$ : 501.1454, found: 501.1456

*N*-(1-(4-methoxyphenyl)-5-methyl-4-(naphthalen-1-yl)-1H-pyrrol-3-yl)-4-methylbenzenesulfonamide (3la)

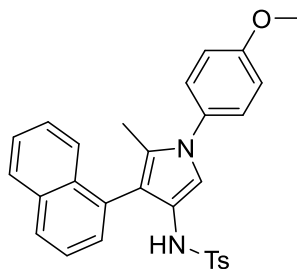

3la

The title compound was prepared from **11** (80.6 mg, 0.2 mmol, 1 eq.) and **2a** (36.9 mg, 0.3 mmol, 1.5 eq.) via general procedure. Purified by silica gel column chromatography (eluent: EtOAc/PE = 1:3) furnished **3la** (89.7mg, 93% yield) as colorless solid.

$^1\text{H}$  NMR (300 MHz,  $\text{CDCl}_3$ )  $\delta$  7.82 (dd,  $J = 23.5, 8.2$  Hz, 2H), 7.51-7.27 (m, 7H), 7.05 (s, 1H), 7.03-6.90 (m, 4H), 6.85 (d,  $J = 7.0$  Hz, 1H), 5.91 (s, 1H), 3.87 (s, 3H), 2.32 (s, 3H), 1.85 (s, 3H).

$^{13}\text{C}$  NMR (75 MHz,  $\text{CDCl}_3$ )  $\delta$  158.8, 143.0, 136.0, 133.8, 132.9, 132.5, 130.8, 129.2, 128.5, 128.4, 127.6, 127.2, 127.2, 126.4, 126.1, 125.8, 125.7, 125.5, 119.2, 115.7, 115.6, 114.4, 55.7, 21.7, 11.6.

HRMS (ESI)  $m/z$  calculated for  $\text{C}_{29}\text{H}_{27}\text{N}_2\text{O}_3\text{S}$   $[\text{M}+\text{H}]^+$ : 483.1737, found: 483.1735.

*N*-(1-(4-methoxyphenyl)-5-methyl-4-(naphthalen-2-yl)-1H-pyrrol-3-yl)-4-methylbenzenesulfonamide (3ma)

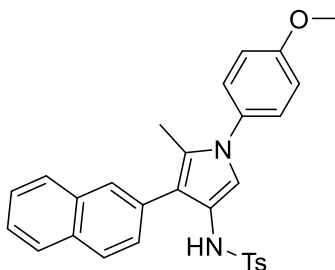

3ma

The title compound was prepared from **1m** (80.6 mg, 0.2 mmol, 1 eq.) and **2a** (36.9 mg, 0.3 mmol, 1.5 eq.) via general procedure. Purified by silica gel column chromatography (eluent: EtOAc/PE = 1:3) furnished **3ma** (86.8mg, 90% yield) as colorless solid.

$^1\text{H}$  NMR (300 MHz,  $\text{CDCl}_3$ )  $\delta$  7.93-7.62 (m, 3H), 7.46 (m,  $J = 7.6$  Hz, 4H), 7.23 (m, 2H), 7.16-6.76 (m, 6H), 6.24 (s, 1H), 3.85 (s, 3H), 2.29 (s, 3H), 2.05 (s, 3H).

$^{13}\text{C}$  NMR (75 MHz,  $\text{CDCl}_3$ )  $\delta$  158.9, 143.3, 136.5, 133.6, 132.7, 132.0, 131.2, 129.3, 128.1, 128.0, 127.8, 127.7, 127.3, 127.3, 126.2, 125.8, 125.5, 118.3, 118.1, 116.7, 114.4, 55.7, 21.6, 11.6.

HRMS (ESI)  $m/z$  calculated for  $\text{C}_{29}\text{H}_{27}\text{N}_2\text{O}_3\text{S}$   $[\text{M}+\text{H}]^+$ : 483.1737, found: 483.1735.

*N*-(1-(4-methoxyphenyl)-5-methyl-4-propyl-1H-pyrrol-3-yl)-4-methylbenzenesulfonamide (**3na**)

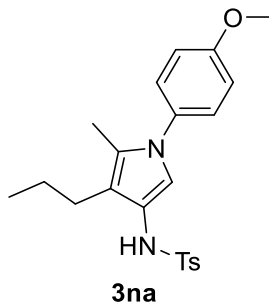

The title compound was prepared from **1n** (63.8 mg, 0.2 mmol, 1 eq.) and **2a** (36.9 mg, 0.3 mmol, 1.5 eq.) via general procedure. Purified by silica gel column chromatography (eluent: EtOAc/PE = 1:3) furnished **3na** (45.4mg, 57% yield) as colorless solid.

$^1\text{H}$  NMR (300 MHz,  $\text{CDCl}_3$ )  $\delta$  7.76-7.65 (m, 2H), 7.23 (d,  $J = 0.9$  Hz, 1H), 7.16-7.05 (m, 2H), 6.97-6.87 (m, 2H), 6.45 (s, 1H), 5.88 (s, 1H), 3.84 (s, 3H), 2.40 (s, 3H), 2.23-2.08 (m, 2H), 1.98 (s, 3H), 1.33-1.23 (m, 2H), 0.82 (t,  $J = 7.3$  Hz, 3H).

$^{13}\text{C}$  NMR (75 MHz,  $\text{CDCl}_3$ )  $\delta$  158.6, 137.1, 133.0, 129.5, 127.6, 127.2, 124.8, 118.1, 117.3, 116.5, 114.2, 55.7, 25.6, 24.1, 21.7, 14.2, 10.9.

HRMS (ESI)  $m/z$  calculated for  $\text{C}_{22}\text{H}_{27}\text{N}_2\text{O}_3\text{S}$   $[\text{M}+\text{H}]^+$ : 399.1737, found: 399.1738.

*N*-(4-isopropyl-1-(4-methoxyphenyl)-5-methyl-1H-pyrrol-3-yl)-4-methylbenzenesulfonamide (**3oa**)

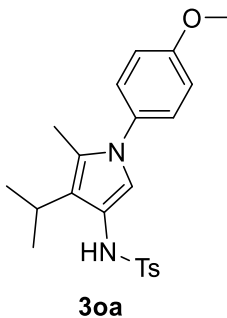

The title compound was prepared from **1o** (63.8 mg, 0.2 mmol, 1 eq.) and **2a** (36.9 mg, 0.3 mmol, 1.5 eq.) via general procedure. Purified by silica gel column chromatography (eluent: EtOAc/PE = 1:3) furnished **3oa** (50.2mg, 63% yield) as colorless solid.

$^1\text{H}$  NMR (300 MHz,  $\text{CDCl}_3$ )  $\delta$  7.85-7.61 (m, 2H), 7.23 (s, 1H), 7.14-7.05 (m, 2H), 6.96-6.84 (m, 2H), 6.43 (s, 1H), 5.92 (s, 1H), 3.83 (s, 3H), 2.75 (p,  $J = 7.1$  Hz, 1H), 2.40 (s, 3H), 2.02 (s, 3H), 1.07 (d,  $J = 7.1$  Hz, 6H).

$^{13}\text{C}$  NMR (75 MHz,  $\text{CDCl}_3$ )  $\delta$  158.6, 143.3, 137.1, 132.8, 129.4, 127.6, 127.5, 123.6, 122.6, 117.3, 116.8, 114.2, 55.6, 24.6, 22.6, 21.6, 11.5.

HRMS (ESI)  $m/z$  calculated for  $\text{C}_{22}\text{H}_{27}\text{N}_2\text{O}_3\text{S}$   $[\text{M}+\text{H}]^+$ : 399.1737, found: 399.1735.

*N*-(4-benzyl-1-(4-methoxyphenyl)-5-methyl-1H-pyrrol-3-yl)-4-methylbenzenesulfonamide (**3pa**)

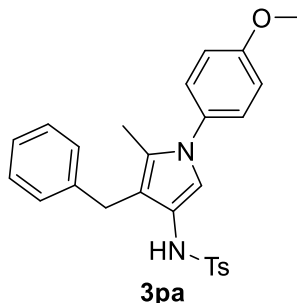

The title compound was prepared from **1p** (73.4 mg, 0.2 mmol, 1 eq.) and **2a** (36.9 mg, 0.3 mmol, 1.5 eq.) via general procedure. Purified by silica gel column chromatography (eluent: EtOAc/PE = 1:3) furnished **3pa** (56.2mg, 63% yield) as colorless solid.

$^1\text{H}$  NMR (300 MHz,  $\text{CDCl}_3$ )  $\delta$  7.77-7.55 (m, 2H), 7.07 (dd,  $J$  = 59.0, 26.8 Hz, 10H), 6.55 (s, 1H), 5.77 (s, 1H), 3.82 (s, 3H), 3.50 (s, 2H), 2.40 (s, 3H), 1.98 (s, 3H).

$^{13}\text{C}$  NMR (75 MHz,  $\text{CDCl}_3$ )  $\delta$  158.6, 143.4, 140.9, 137.0, 132.9, 129.5, 128.6, 128.1, 127.5, 127.2, 125.9, 125.4, 118.5, 117.1, 115.3, 114.2, 55.6, 29.4, 21.7, 11.0.

HRMS (ESI)  $m/z$  calculated for  $\text{C}_{26}\text{H}_{27}\text{N}_2\text{O}_3\text{S}$   $[\text{M}+\text{H}]^+$ : 447.1737, found: 447.1738.

*N*-(4-cyclopropyl-1-(4-methoxyphenyl)-5-methyl-1H-pyrrol-3-yl)-4-methylbenzenesulfonamide (**3qa**)

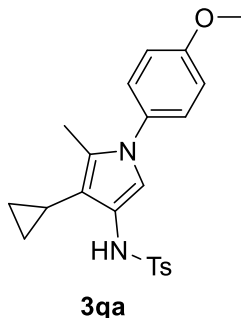

The title compound was prepared from **1q** (63.4 mg, 0.2 mmol, 1 eq.) and **2a** (36.9 mg, 0.3 mmol, 1.5 eq.) via general procedure. Purified by silica gel column chromatography (eluent: EtOAc/PE = 1:3) furnished **3qa** (49.9mg, 62% yield) as colorless solid.

$^1\text{H}$  NMR (300 MHz,  $\text{CDCl}_3$ )  $\delta$  7.78-7.66 (m, 2H), 7.22 (d, 1H), 7.16-7.07 (m, 2H), 6.97-6.88 (m, 2H), 6.63 (s, 1H), 6.15 (s, 1H), 3.84 (s, 3H), 2.40 (s, 3H), 2.02 (s, 3H), 1.01 (td,  $J$  = 7.9, 4.1 Hz, 1H), 0.73-0.62 (m, 2H), 0.23 (dt,  $J$  = 5.4, 2.9 Hz, 2H).

$^{13}\text{C}$  NMR (75 MHz,  $\text{CDCl}_3$ )  $\delta$  158.6, 143.4, 136.8, 133.0, 129.5, 127.5, 127.2, 126.7, 120.3, 115.3, 114.2, 113.7, 55.6, 21.7, 11.0, 4.9, 4.0.

**HRMS** (ESI)  $m/z$  calculated for  $C_{22}H_{25}N_2O_3S$   $[M+H]^+$ : 397.1580, found: 397.1584.

***N*-(1-(4-methoxyphenyl)-4,5-dimethyl-1H-pyrrol-3-yl)-4-methylbenzenesulfonamide (3ra)**

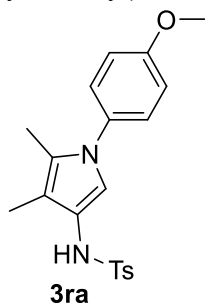

The title compound was prepared from **1r** (58.2 mg, 0.2 mmol, 1 eq.) and **2a** (36.9 mg, 0.3 mmol, 1.5 eq.) via general procedure. Purified by silica gel column chromatography (eluent: EtOAc/PE = 1:3) furnished **3ra** (49.6mg, 67% yield) as colorless solid.

**$^1H$  NMR** (300 MHz,  $CDCl_3$ )  $\delta$  7.70 (d,  $J$  = 8.3 Hz, 2H), 7.23 (s, 1H), 7.08 (d,  $J$  = 8.9 Hz, 2H), 6.91 (d,  $J$  = 8.9 Hz, 2H), 6.43 (s, 1H), 6.00 (d,  $J$  = 13.5 Hz, 1H), 3.83 (s, 3H), 2.40 (s, 3H), 1.97 (s, 3H), 1.73 (s, 3H).

**$^{13}C$  NMR** (75 MHz,  $CDCl_3$ )  $\delta$  158.6, 143.3, 137.1, 133.0, 129.4, 127.6, 127.1, 124.8, 118.5, 117.0, 114.2, 113.0, 55.6, 21.6, 10.8, 8.3.

**HRMS** (ESI)  $m/z$  calculated for  $C_{20}H_{23}N_2O_3S$   $[M+H]^+$ : 371.1424, found: 371.1426.

***N*-(4-ethyl-1-(4-methoxyphenyl)-5-methyl-1H-pyrrol-3-yl)-4-methylbenzenesulfonamide (3sa)**

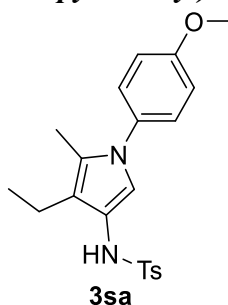

The title compound was prepared from **1s** (61.0 mg, 0.2 mmol, 1 eq.) and **2a** (36.9 mg, 0.3 mmol, 1.5 eq.) via general procedure. Purified by silica gel column chromatography (eluent: EtOAc/PE = 1:3) furnished **3sa** (49.9mg, 65% yield) as colorless solid.

**$^1H$  NMR** (300 MHz,  $CDCl_3$ )  $\delta$  7.72 (d,  $J$  = 8.3 Hz, 2H), 7.24-7.21 (m, 1H), 7.09 (d,  $J$  = 8.9 Hz, 2H), 6.90 (d,  $J$  = 8.9 Hz, 2H), 6.41 (s, 1H), 6.11 (s, 1H), 3.83 (s, 3H), 2.39 (s, 3H), 2.24 (q,  $J$  = 7.6 Hz, 2H), 1.99 (s, 3H), 0.93 (t,  $J$  = 7.6 Hz, 3H).

**$^{13}C$  NMR** (75 MHz,  $CDCl_3$ )  $\delta$  158.5, 143.3, 137.1, 133.0, 129.4, 127.6, 127.2, 124.4, 119.2, 117.9, 116.5, 114.2, 60.5, 55.6, 21.6, 21.2, 16.6, 15.4, 14.3, 10.7.

**HRMS** (ESI)  $m/z$  calculated for  $C_{21}H_{25}N_2O_3S$   $[M+H]^+$ : 385.1580, found: 385.1582.



**4-methyl-N-(5-methyl-1,4-diphenyl-1H-pyrrol-3-yl)benzenesulfonamide (3ab)**

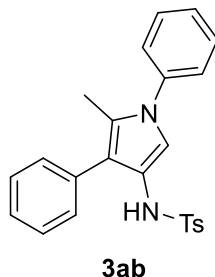

The title compound was prepared from **1a** (76.6 mg, 0.2 mmol, 1 eq.) and **2b** (27.9 mg, 0.3 mmol, 1.5 eq.) via general procedure. Purified by silica gel column chromatography (eluent: EtOAc/PE = 1:3) furnished **3ab** (64.3 mg, 80% yield) as colorless solid.

**<sup>1</sup>H NMR** (300 MHz, CDCl<sub>3</sub>) δ 7.56-7.50 (m, 2H), 7.45 (dd, *J* = 8.3, 6.6 Hz, 2H), 7.40-7.35 (m, 1H), 7.32 (d, *J* = 1.6 Hz, 1H), 7.30-7.26 (m, 2H), 7.24-7.21 (m, 1H), 7.13 (d, *J* = 8.0 Hz, 2H), 6.94-6.84 (m, 3H), 6.15 (s, 1H), 2.39 (s, 3H), 2.04 (s, 3H).

**<sup>13</sup>C NMR** (75 MHz, CDCl<sub>3</sub>) δ 143.3, 139.7, 136.3, 133.4, 129.6, 129.4, 129.4, 129.3, 128.6, 127.4, 127.3, 126.5, 125.9, 124.9, 118.6, 118.5, 115.5, 21.7, 11.7.

**HRMS** (ESI) *m/z* calculated for C<sub>24</sub>H<sub>23</sub>N<sub>2</sub>O<sub>2</sub>S [M+H]<sup>+</sup>: 403.1475, found: 403.1476.

**4-methyl-N-(5-methyl-4-phenyl-1-(*p*-tolyl)-1H-pyrrol-3-yl)benzenesulfonamide (3ac)**

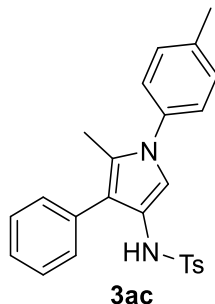

The title compound was prepared from **1a** (76.6 mg, 0.2 mmol, 1 eq.) and **2c** (32.1 mg, 0.3 mmol, 1.5 eq.) via general procedure. Purified by silica gel column chromatography (eluent: EtOAc/PE=1:3) furnished **3ac** (71.6 mg, 86% yield) as colorless solid.

**<sup>1</sup>H NMR** (400 MHz, CDCl<sub>3</sub>) δ 7.57-7.49 (m, 2H), 7.28 (d, *J* = 6.7 Hz, 2H), 7.24 (s, 2H), 7.16 (dd, *J* = 19.8, 8.2 Hz, 4H), 6.90-6.83 (m, 3H), 6.11 (s, 1H), 2.40 (d, *J* = 8.3 Hz, 6H), 2.02 (s, 3H).

**<sup>13</sup>C NMR** (75 MHz, CDCl<sub>3</sub>) δ 143.3, 137.3, 137.3, 136.4, 133.5, 129.9, 129.7, 129.4, 128.6, 127.4, 126.5, 125.8, 125.0, 118.3, 118.3, 115.6, 21.7, 21.2, 11.6.

**HRMS** (ESI) *m/z* calculated for C<sub>25</sub>H<sub>24</sub>N<sub>2</sub>O<sub>2</sub>S [M+H]<sup>+</sup>: 417.1631, found: 417.1632.

**4-methyl-N-(5-methyl-4-phenyl-1-(4-tritylphenyl)-1H-pyrrol-3-yl)benzenesulfonamide (3ad)**

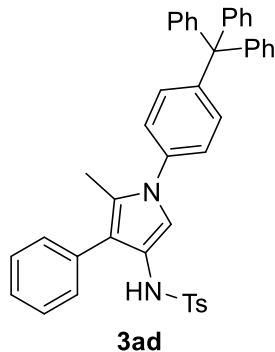

The title compound was prepared from **1a** (76.6 mg, 0.2 mmol, 1 eq.) and **2d** (100.5 mg, 0.3 mmol, 1.5 eq.) via general procedure. Purified by silica gel column chromatography (eluent: EtOAc/PE = 1:3) furnished **3ad** (109.5 mg, 85% yield) as colorless solid.

**<sup>1</sup>H NMR** (300 MHz, CDCl<sub>3</sub>) δ 7.49 (d, *J* = 8.3 Hz, 2H), 7.30-7.13 (m, 23H), 6.95 (s, 1H), 6.83 (dd, *J* = 7.8, 1.8 Hz, 2H), 6.08 (s, 1H), 2.38 (s, 3H), 2.06 (s, 3H).

**<sup>13</sup>C NMR** (75 MHz, CDCl<sub>3</sub>) δ 146.6, 146.0, 143.4, 137.5, 136.3, 133.4, 132.0, 131.2, 129.7, 129.4, 128.6, 127.8, 127.4, 126.6, 126.3, 124.9, 124.6, 118.5, 118.5, 115.4, 64.8, 21.7, 11.9.

**HRMS** (ESI) *m/z* calculated for C<sub>43</sub>H<sub>36</sub>N<sub>2</sub>O<sub>2</sub>S [M+H]<sup>+</sup>: 644.2497, found: 644.2499.

**N-(1-(4-(benzyloxy)phenyl)-5-methyl-4-phenyl-1H-pyrrol-3-yl)-4-methylbenzenesulfonamide (3ae)**

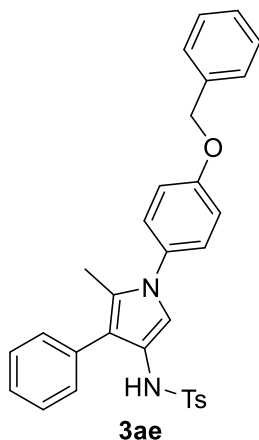

The title compound was prepared from **1a** (76.6 mg, 0.2 mmol, 1 eq.) and **2e** (59.7 mg, 0.3 mmol, 1.5 eq.) via general procedure. Purified by silica gel column chromatography (eluent: EtOAc/PE = 1:3) furnished **3ae** (80.3 mg, 79% yield) as colorless solid.

**<sup>1</sup>H NMR** (300 MHz, CDCl<sub>3</sub>) δ 7.54-7.49 (m, 2H), 7.49-7.36 (m, 5H), 7.22 (ddd, *J* = 8.9, 4.5, 2.6 Hz, 4H), 7.13 (d, *J* = 8.0 Hz, 2H), 7.07-6.99 (m, 2H), 6.90-6.82 (m, 3H), 6.11 (s, 1H), 5.10 (s, 2H), 2.38 (s, 3H), 2.00 (s, 3H).

**<sup>13</sup>C NMR** (75 MHz, CDCl<sub>3</sub>) δ 158.0, 143.3, 136.7, 136.4, 133.5, 133.0, 129.6, 129.4, 128.8, 128.6, 128.3, 127.6, 127.4, 127.3, 126.4, 125.2, 118.1, 115.8, 115.3, 70.4, 21.7, 11.5.

**HRMS** (ESI) *m/z* calculated for C<sub>31</sub>H<sub>29</sub>N<sub>2</sub>O<sub>2</sub>S [M+H]<sup>+</sup>: 509.1893, found: 509.1895.

***N*-(1-(4-iodophenyl)-5-methyl-4-phenyl-1*H*-pyrrol-3-yl)-4-methylbenzenesulfonamide (3af)**

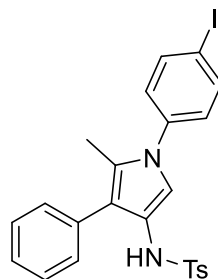

**3af**

The title compound was prepared from **1a** (76.6 mg, 0.2 mmol, 1 eq.) and **2f** (65.7 mg, 0.3 mmol, 1.5 eq.) via general procedure. Purified by silica gel column chromatography (eluent: EtOAc/PE = 1:3) furnished **3af** (85.5 mg, 81% yield) as colorless solid.

**<sup>1</sup>H NMR** (300 MHz, CDCl<sub>3</sub>) δ 7.81-7.73 (m, 2H), 7.55-7.48 (m, 2H), 7.25 (d, *J* = 2.1 Hz, 2H), 7.13 (d, *J* = 8.0 Hz, 2H), 7.09-7.02 (m, 2H), 6.87 (d, *J* = 2.3 Hz, 2H), 6.84 (t, *J* = 1.6 Hz, 1H), 6.17 (s, 1H), 2.38 (s, 3H), 2.03 (s, 3H).

**<sup>13</sup>C NMR** (75 MHz, CDCl<sub>3</sub>) δ 143.4, 139.4, 138.4, 136.2, 133.0, 129.6, 129.4, 128.6, 127.5, 127.3, 126.6, 124.7, 119.0, 118.96, 115.0, 92.1, 21.6, 11.6.

**HRMS** (ESI) *m/z* calculated for C<sub>24</sub>H<sub>21</sub>IN<sub>2</sub>O<sub>2</sub>S [M+H]<sup>+</sup>: 529.0441, found: 529.0443.

***N*-(1-(4-bromophenyl)-5-methyl-4-phenyl-1*H*-pyrrol-3-yl)-4-methylbenzenesulfonamide (3ag)**

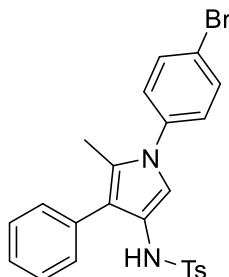

**3ag**

The title compound was prepared from **1a** (76.6 mg, 0.2 mmol, 1 eq.) and **2g** (51.3 mg, 0.3 mmol, 1.5 eq.) via general procedure. Purified by silica gel column chromatography (eluent: EtOAc/PE = 1:3) furnished

**3ag** (74.9 mg, 78% yield) as colorless solid.

$^1\text{H NMR}$  (300 MHz,  $\text{CDCl}_3$ )  $\delta$  7.63-7.47 (m, 4H), 7.25 (q,  $J = 3.0, 2.5$  Hz, 2H), 7.22-7.10 (m, 4H), 6.92-6.81 (m, 3H), 6.15 (s, 1H), 2.39 (s, 3H), 2.03 (s, 3H).

$^{13}\text{C NMR}$  (75 MHz,  $\text{CDCl}_3$ )  $\delta$  143.4, 138.7, 136.2, 133.1, 132.4, 129.6, 129.4, 128.6, 127.3, 127.3, 126.6, 124.8, 121.0, 118.9, 118.9, 115.1, 21.6, 11.6.

**HRMS** (ESI)  $m/z$  calculated for  $\text{C}_{24}\text{H}_{22}\text{BrN}_2\text{O}_2\text{S}$   $[\text{M}+\text{H}]^+$ : 481.0580, found: 481.0582.

**4-methyl-N-(5-methyl-4-phenyl-1-(4-(trifluoromethyl)phenyl)-1H-pyrrol-3-yl)benzenesulfonamide (3ah)**

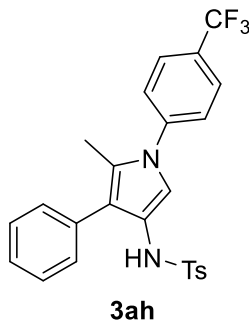

The title compound was prepared from **1a** (76.6 mg, 0.2 mmol, 1 eq.) and **2h** (48.3 mg, 0.3 mmol, 1.5 eq.) via general procedure. Purified by silica gel column chromatography (eluent: EtOAc/PE = 1:3) furnished **3ah** (71.5mg, 76% yield) as colorless solid.

$^1\text{H NMR}$  (400 MHz,  $\text{CDCl}_3$ )  $\delta$  7.73 (d,  $J = 8.3$  Hz, 2H), 7.57-7.51 (m, 2H), 7.44 (d,  $J = 8.2$  Hz, 2H), 7.28 (d,  $J = 7.4$  Hz, 2H), 7.15 (d,  $J = 8.0$  Hz, 2H), 6.94 (s, 1H), 6.87 (dd,  $J = 8.0, 1.6$  Hz, 2H), 6.20 (s, 1H), 2.39 (s, 3H), 2.07 (s, 3H).

$^{13}\text{C NMR}$  (101 MHz,  $\text{CDCl}_3$ )  $\delta$  143.5, 142.7, 136.3, 132.9, 129.7, 129.5, 129.2 (q,  $J = 33.0$  Hz), 128.7, 127.3, 126.8, 126.6 (q,  $J = 3.7$  Hz), 125.7, 124.8, 124.0 (q,  $J = 272.0$  Hz), 119.6, 119.5, 114.9, 21.7, 11.8.

$^{19}\text{F NMR}$  (376 MHz,  $\text{CDCl}_3$ )  $\delta$ -62.33.

**HRMS** (ESI)  $m/z$  calculated for  $\text{C}_{25}\text{H}_{22}\text{F}_3\text{N}_2\text{O}_2\text{S}$   $[\text{M}+\text{H}]^+$ : 471.1349, found: 471.1346.

**4-methyl-N-(5-methyl-4-phenyl-1-(m-tolyl)-1H-pyrrol-3-yl)benzenesulfonamide (3ai)**

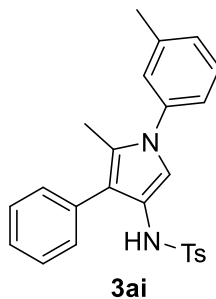

The title compound was prepared from **1a** (76.6 mg, 0.2 mmol, 1 eq.) and **2i** (32.1 mg, 0.3 mmol, 1.5 eq.)

via general procedure. Purified by silica gel column chromatography (eluent: EtOAc/PE = 1:3) furnished **3ai** (69.1 mg, 83% yield) as colorless solid.

<sup>1</sup>H NMR (300 MHz, CDCl<sub>3</sub>) δ 7.52 (d, *J* = 7.9 Hz, 2H), 7.32 (t, *J* = 7.8 Hz, 1H), 7.24 (s, 2H), 7.13 (q, *J* = 9.8, 9.1 Hz, 5H), 6.95-6.77 (m, 3H), 6.13 (s, 1H), 2.40 (d, *J* = 8.6 Hz, 6H), 2.04 (s, 3H).

<sup>13</sup>C NMR (75 MHz, CDCl<sub>3</sub>) δ 143.3, 139.6, 139.3, 136.3, 133.4, 129.6, 129.4, 129.0, 128.5, 128.1, 127.3, 126.5, 126.4, 124.8, 122.9, 118.4, 118.3, 115.5, 21.6, 21.4, 11.7.

HRMS (ESI) *m/z* calculated for C<sub>25</sub>H<sub>25</sub>N<sub>2</sub>O<sub>2</sub>S [M+H]<sup>+</sup>: 417.1631, found: 417.1633.

*N*-(1-(3-chlorophenyl)-5-methyl-4-phenyl-1H-pyrrol-3-yl)-4-methylbenzenesulfonamide (**3aj**)

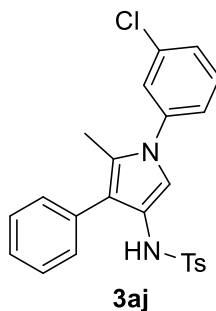

The title compound was prepared from **1a** (76.6 mg, 0.2 mmol, 1 eq.) and **2j** (38.1 mg, 0.3 mmol, 1.5 eq.) via general procedure. Purified by silica gel column chromatography (eluent: EtOAc/PE = 1:3) furnished **3aj** (74.1 mg, 85% yield) as colorless solid.

<sup>1</sup>H NMR (400 MHz, CDCl<sub>3</sub>) δ 7.55-7.49 (m, 2H), 7.42-7.28 (m, 4H), 7.21 (dt, *J* = 7.7, 1.6 Hz, 1H), 7.15 (d, *J* = 8.0 Hz, 2H), 6.90 (s, 1H), 6.88-6.82 (m, 2H), 6.13 (s, 1H), 2.40 (s, 3H), 2.05 (s, 3H).

<sup>13</sup>C NMR (101 MHz, CDCl<sub>3</sub>) δ 143.4, 140.8, 136.2, 134.8, 133.0, 130.3, 129.6, 129.4, 128.6, 127.5, 127.3, 126.7, 126.0, 124.8, 124.0, 119.1, 119.0, 115.1, 21.7, 11.7.

HRMS (ESI) *m/z* calculated for C<sub>24</sub>H<sub>22</sub>ClN<sub>2</sub>O<sub>2</sub>S [M+H]<sup>+</sup>: 437.1085, found: 437.1087.

*N*-(1-(3-bromophenyl)-5-methyl-4-phenyl-1H-pyrrol-3-yl)-4-methylbenzenesulfonamide (**3ak**)

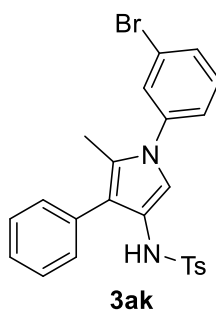

The title compound was prepared from **1a** (76.6 mg, 0.2 mmol, 1 eq.) and **2k** (51.0 mg, 0.3 mmol, 1.5 eq.) via general procedure. Purified by silica gel column chromatography (eluent: EtOAc/PE = 1:3) furnished **3ak** (83.5 mg, 87% yield) as colorless solid.

**<sup>1</sup>H NMR** (400 MHz, CDCl<sub>3</sub>) δ 7.56-7.45 (m, 4H), 7.33 (t, *J* = 7.9 Hz, 1H), 7.27 (d, *J* = 7.5 Hz, 2H), 7.16 (d, *J* = 8.1 Hz, 2H), 6.90 (s, 1H), 6.85 (dd, *J* = 7.9, 1.7 Hz, 2H), 6.10 (s, 1H), 2.40 (s, 3H), 2.05 (s, 3H).  
**<sup>13</sup>C NMR** (101 MHz, CDCl<sub>3</sub>) δ 143.5, 140.9, 136.2, 133.0, 130.6, 130.4, 129.7, 129.5, 128.9, 128.7, 127.3, 126.7, 124.9, 124.5, 122.7, 119.2, 118.9, 115.1, 21.7, 11.7.

**HRMS** (ESI) *m/z* calculated for C<sub>24</sub>H<sub>22</sub>BrN<sub>2</sub>O<sub>2</sub>S [M+H]<sup>+</sup>: 481.0580, found: 481.0581.

***N*-(1-(3-isopropylphenyl)-5-methyl-4-phenyl-1H-pyrrol-3-yl)-4-methylbenzenesulfonamide (3al)**

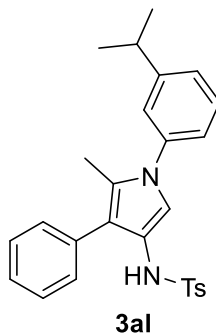

The title compound was prepared from **1a** (76.6 mg, 0.2 mmol, 1 eq.) and **2l** (40.5 mg, 0.3 mmol, 1.5 eq.) via general procedure. Purified by silica gel column chromatography (eluent: EtOAc/PE = 1:3) furnished **3al** (71.1 mg, 80% yield) as colorless solid.

**<sup>1</sup>H NMR** (300 MHz, CDCl<sub>3</sub>) δ 7.53 (d, *J* = 8.3 Hz, 2H), 7.36 (t, *J* = 7.7 Hz, 1H), 7.28 (s, 1H), 7.23 (dd, *J* = 7.3, 2.0 Hz, 2H), 7.18-7.08 (m, 4H), 6.93-6.85 (m, 3H), 6.12 (s, 1H), 2.97 (p, *J* = 6.9 Hz, 1H), 2.39 (s, 3H), 2.05 (s, 3H), 1.29 (d, *J* = 6.9 Hz, 6H).

**<sup>13</sup>C NMR** (75 MHz, CDCl<sub>3</sub>) δ 150.4, 143.3, 139.7, 136.3, 133.5, 129.7, 129.4, 129.1, 128.6, 127.4, 126.5, 125.5, 124.9, 124.0, 123.2, 118.4, 118.3, 115.6, 34.1, 24.0, 21.6, 11.7.

**HRMS** (ESI) *m/z* calculated for C<sub>27</sub>H<sub>29</sub>N<sub>2</sub>O<sub>2</sub>S [M+H]<sup>+</sup>: 445.1944, found: 445.1946.

***N*-(1-(2-chlorophenyl)-5-methyl-4-phenyl-1H-pyrrol-3-yl)-4-methylbenzenesulfonamide (3am)**

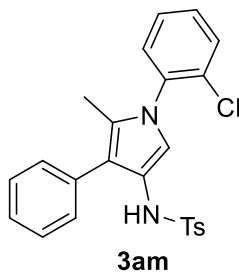

The title compound was prepared from **1a** (76.6 mg, 0.2 mmol, 1 eq.) and **2m** (38.1 mg, 0.3 mmol, 1.5 eq.) via general procedure. Purified by silica gel column chromatography (eluent: EtOAc/PE = 1:3) furnished **3am** (68.0 mg, 78% yield) as colorless solid.

**<sup>1</sup>H NMR** (300 MHz, CDCl<sub>3</sub>) δ 7.58-7.48 (m, 3H), 7.38 (q, *J* = 4.0 Hz, 3H), 7.23 (s, 2H), 7.12 (d, *J* = 8.0 Hz, 2H), 6.85 (s, 1H), 6.82-6.73 (m, 2H), 6.12 (s, 1H), 2.39 (s, 3H), 1.88 (s, 3H).

**<sup>13</sup>C NMR** (75 MHz, CDCl<sub>3</sub>) δ 143.4, 137.3, 135.9, 133.2, 132.8, 130.4, 129.9, 129.9, 129.6, 129.3, 128.6, 127.7, 127.4, 126.5, 126.1, 118.6, 117.6, 115.6, 21.7, 10.8.

**HRMS** (ESI) *m/z* calculated for C<sub>24</sub>H<sub>22</sub>ClN<sub>2</sub>O<sub>2</sub>S [M+H]<sup>+</sup>: 437.1085, found: 437.1087.

*N*-(1-(benzo[d][1,3]dioxol-4-yl)-5-methyl-4-phenyl-1*H*-pyrrol-3-yl)-4-methylbenzenesulfonamide (**3an**)

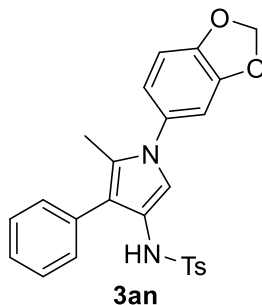

The title compound was prepared from **1a** (76.6 mg, 0.2 mmol, 1 eq.) and **2n** (41.1 mg, 0.3 mmol, 1.5 eq.) via general procedure. Purified by silica gel column chromatography (eluent: EtOAc/PE = 1:3) furnished **3an** (64.2 mg, 72% yield) as colorless solid.

**<sup>1</sup>H NMR** (300 MHz, CDCl<sub>3</sub>) δ 7.51 (d, *J* = 8.3 Hz, 2H), 7.26-7.20 (m, 2H), 7.14 (d, *J* = 8.0 Hz, 2H), 6.89-6.82 (m, 4H), 6.76 (d, *J* = 7.8 Hz, 2H), 6.09 (s, 1H), 6.04 (s, 2H), 2.39 (s, 3H), 2.00 (s, 3H).

**<sup>13</sup>C NMR** (101 MHz, CDCl<sub>3</sub>) δ 148.0, 147.0, 143.3, 136.3, 133.7, 133.4, 129.6, 129.4, 128.6, 127.3, 126.4, 125.2, 119.5, 118.1, 118.1, 115.7, 108.2, 107.5, 101.9, 21.6, 11.4.

**HRMS** (ESI) *m/z* calculated for C<sub>25</sub>H<sub>23</sub>N<sub>2</sub>O<sub>4</sub>S [M+H]<sup>+</sup>: 447.1373, found: 447.1375.

*N*-(1-(dibenzo[*b,d*]furan-2-yl)-5-methyl-4-phenyl-1*H*-pyrrol-3-yl)-4-methylbenzenesulfonamide (**3ao**)

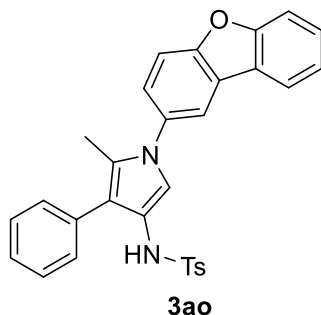

The title compound was prepared from **1a** (76.6 mg, 0.2 mmol, 1 eq.) and **2o** (54.9 mg, 0.3 mmol, 1.5 eq.) via general procedure. Purified by silica gel column chromatography (eluent: EtOAc/PE = 1:3) furnished **3ao** (44.3 mg, 45% yield) as colorless solid.

**<sup>1</sup>H NMR** (300 MHz, CDCl<sub>3</sub>) δ 8.00-7.94 (m, 1H), 7.88 (d, *J* = 2.2 Hz, 1H), 7.64-7.51 (m, 5H), 7.43-7.36 (m, 2H), 7.29 (s, 1H), 7.26 (s, 1H), 7.16 (d, *J* = 8.0 Hz, 2H), 6.99 (s, 1H), 6.94-6.86 (m, 2H), 6.15 (s, 1H), 2.40 (s, 3H), 2.06 (s, 3H).

**<sup>13</sup>C NMR** (75 MHz, CDCl<sub>3</sub>) δ 157.1, 155.0, 143.3, 136.4, 135.0, 133.5, 129.7, 129.5, 128.6, 128.1, 127.4, 126.5, 125.5, 125.4, 125.1, 123.8, 123.3, 121.0, 118.5, 118.4, 118.3, 116.2, 112.1, 21.7, 11.6.

**HRMS** (ESI) *m/z* calculated for C<sub>30</sub>H<sub>25</sub>N<sub>2</sub>O<sub>3</sub>S [M+H]<sup>+</sup>: 493.1580, found: 493.1582.

***N*-(1-(1*H*-indazol-5-yl)-5-methyl-4-phenyl-1*H*-pyrrol-3-yl)-4-methylbenzenesulfonamide (3ap)**

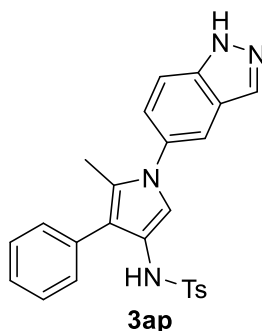

The title compound was prepared from **1a** (76.6 mg, 0.2 mmol, 1 eq.) and **2p** (40.0 mg, 0.3 mmol, 1.5 eq.) via general procedure. Purified by silica gel column chromatography (eluent: EtOAc/PE = 1:3) furnished **3ap** (44.2 mg, 50% yield) as colorless solid.

**<sup>1</sup>H NMR** (400 MHz, CDCl<sub>3</sub>) δ 8.10 (s, 1H), 7.67 (d, *J* = 2.1 Hz, 1H), 7.56 (t, *J* = 8.5 Hz, 3H), 7.35-7.27 (m, 2H), 7.23 (t, *J* = 7.2 Hz, 1H), 7.15 (d, *J* = 8.2 Hz, 2H), 6.94 (s, 1H), 6.93-6.87 (m, 2H), 6.45 (s, 1H), 5.30 (s, 1H), 2.39 (s, 3H), 2.03 (s, 3H).

**<sup>13</sup>C NMR** (101 MHz, CDCl<sub>3</sub>) δ 143.4, 136.5, 133.6, 133.4, 129.7, 129.5, 128.6, 127.4, 126.5, 126.0, 125.5, 118.3, 118.3, 118.2, 116.3, 110.5, 21.7, 11.6.

**HRMS** (ESI) *m/z* calculated for C<sub>25</sub>H<sub>23</sub>N<sub>4</sub>O<sub>2</sub>S [M+H]<sup>+</sup>: 443.1536, found: 443.1538.

***N*-(1-benzyl-5-methyl-4-phenyl-1*H*-pyrrol-3-yl)-4-methylbenzenesulfonamide (3aq)**

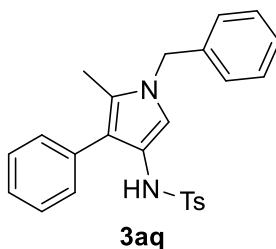

The title compound was prepared from **1a** (76.6 mg, 0.2 mmol, 1 eq.) and **2q** (32.0 mg, 0.3 mmol, 1.5 eq.) via general procedure. Purified by silica gel column chromatography (eluent: EtOAc/PE = 1:3) furnished **3aq** (34.9 mg, 42% yield) as colorless solid.



**<sup>1</sup>H NMR** (300 MHz, CDCl<sub>3</sub>) δ 7.32-7.25 (m, 5H), 7.09 (dd, *J* = 5.1, 1.9 Hz, 3H), 6.96-6.83 (m, 6H), 6.05 (s, 1H), 4.62 (d, *J* = 16.6 Hz, 1H), 4.32 (d, *J* = 16.6 Hz, 1H), 2.30 (s, 3H), 2.08 (s, 3H).

**<sup>13</sup>C NMR** (75 MHz, CDCl<sub>3</sub>) δ 142.3, 138.4, 137.6, 134.4, 129.9, 129.0, 128.7, 127.8, 127.4, 127.0, 127.0, 126.6, 125.5, 120.4, 120.0, 119.1, 47.8, 21.6, 11.2.

**HRMS** (ESI) *m/z* calculated for C<sub>25</sub>H<sub>25</sub>N<sub>2</sub>O<sub>2</sub>S [M+H]<sup>+</sup>: 417.1631, found: 417.1632.

***N*-(1-(4-bromobenzyl)-5-methyl-4-phenyl-1*H*-pyrrol-3-yl)-4-methylbenzenesulfonamide (3ar)**

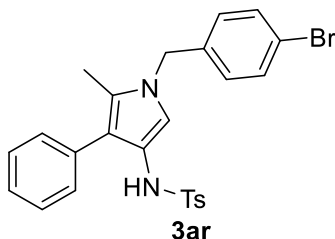

The title compound was prepared from **1a** (76.6 mg, 0.2 mmol, 1 eq.) and **2r** (55.5 mg, 0.3 mmol, 1.5 eq.) via general procedure. Purified by silica gel column chromatography (eluent: EtOAc/PE = 1:3) furnished **3ar** (30.2 mg, 34% yield) as colorless solid.

**<sup>1</sup>H NMR** (300 MHz, CDCl<sub>3</sub>) δ 7.42-7.35 (m, 2H), 7.31-7.25 (m, 2H), 7.15-7.05 (m, 3H), 6.96-6.84 (m, 4H), 6.76 (dd, *J* = 8.8, 2.2 Hz, 2H), 6.34 (s, 1H), 4.71-4.32 (m, 2H), 2.31 (s, 3H), 2.00 (s, 3H).

**<sup>13</sup>C NMR** (75 MHz, CDCl<sub>3</sub>) δ 142.5, 137.5, 137.1, 134.0, 131.7, 129.8, 129.1, 128.5, 128.0, 127.0, 126.8, 125.7, 121.2, 120.7, 120.4, 119.0, 47.6, 21.6, 11.2.

**HRMS** (ESI) *m/z* calculated for C<sub>25</sub>H<sub>24</sub>BrN<sub>2</sub>O<sub>2</sub>S [M+H]<sup>+</sup>: 495.0736, found: 495.0738.

***N*-(1-(4-methoxybenzyl)-5-methyl-4-phenyl-1*H*-pyrrol-3-yl)-4-methylbenzenesulfonamide (3as)**

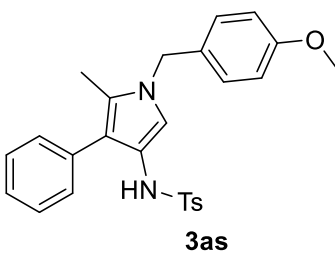

The title compound was prepared from **1a** (76.6 mg, 0.2 mmol, 1 eq.) and **2s** (41.0 mg, 0.3 mmol, 1.5 eq.) via general procedure. Purified by silica gel column chromatography (eluent: EtOAc/PE = 1:3) furnished **3as** (44.5 mg, 45% yield) as colorless solid.

**<sup>1</sup>H NMR** (300 MHz, CDCl<sub>3</sub>) δ 7.34-7.22 (m, 2H), 7.19-7.04 (m, 3H), 6.96 (dd, *J* = 7.2, 2.4 Hz, 2H), 6.90-6.77 (m, 6H), 6.09 (s, 1H), 4.58 (d, *J* = 15.6, 1H), 4.26 (d, *J* = 15.6 Hz, 1H), 3.80 (s, 3H), 2.31 (s, 3H), 2.08 (s, 3H).

$^{13}\text{C}$  NMR (75 MHz,  $\text{CDCl}_3$ )  $\delta$  158.9, 142.3, 137.7, 134.5, 130.5, 129.9, 129.0, 128.1, 127.9, 127.0, 126.5, 125.5, 120.4, 119.9, 119.1, 114.0, 55.5, 47.4, 21.6, 11.2.

HRMS (ESI)  $m/z$  calculated for  $\text{C}_{26}\text{H}_{27}\text{N}_2\text{O}_3\text{S}$   $[\text{M}+\text{H}]^+$ : 447.1737, found: 447.1734.

**4-methyl-N-(5-methyl-4-phenyl-1-(phenylamino)-1H-pyrrol-3-yl)benzenesulfonamide (3at)**

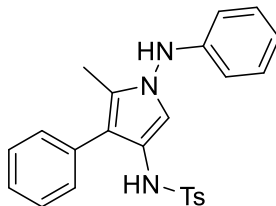

**3at**

The title compound was prepared from **1a** (76.6 mg, 0.2 mmol, 1 eq.) and **2t** (32.4 mg, 0.3 mmol, 1.5 eq.) via general procedure. Purified by silica gel column chromatography (eluent: EtOAc/PE = 1:3) furnished **3at** (50.0 mg, 60% yield) as colorless solid.

$^1\text{H}$  NMR (300 MHz,  $\text{CDCl}_3$ )  $\delta$  7.59-7.41 (m, 4H), 7.41-7.35 (m, 1H), 7.34-7.21 (m, 5H), 7.14 (d,  $J = 8.0$  Hz, 2H), 6.97-6.79 (m, 3H), 6.10 (s, 1H), 2.39 (s, 3H), 2.04 (s, 3H).

$^{13}\text{C}$  NMR (75 MHz,  $\text{CDCl}_3$ )  $\delta$  143.2, 139.8, 136.4, 133.4, 129.7, 129.4, 129.3, 128.6, 127.4, 127.4, 126.6, 126.0, 125.0, 118.6, 118.5, 115.5, 21.7, 11.7.

HRMS (ESI)  $m/z$  calculated for  $\text{C}_{24}\text{H}_{24}\text{N}_3\text{O}_2\text{S}$   $[\text{M}+\text{H}]^+$ : 418.1584, found: 418.1586.

**4-methyl-N-(5-methyl-4-phenyl-1-(p-tolylamino)-1H-pyrrol-3-yl)benzenesulfonamide (3au)**

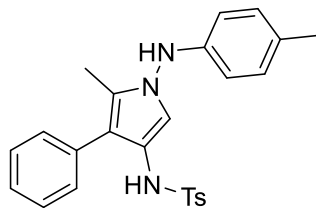

**3au**

The title compound was prepared from **1a** (76.6 mg, 0.2 mmol, 1 eq.) and **2u** (36.6 mg, 0.3 mmol, 1.5 eq.) via general procedure. Purified by silica gel column chromatography (eluent: EtOAc/PE = 1:3) furnished **3au** (44.8 mg, 52% yield) as colorless solid.

$^1\text{H}$  NMR (300 MHz,  $\text{CDCl}_3$ )  $\delta$  7.52 (d,  $J = 8.3$  Hz, 2H), 7.27-7.12 (m, 9H), 6.92-6.80 (m, 3H), 6.08 (s, 1H), 2.40 (d,  $J = 6.2$  Hz, 6H), 2.02 (s, 3H).

$^{13}\text{C}$  NMR (75 MHz,  $\text{CDCl}_3$ )  $\delta$  143.4, 137.3, 136.4, 133.5, 129.9, 129.7, 129.4, 128.6, 127.4, 126.5, 125.8, 125.0, 118.3, 115.6, 21.7, 21.2, 11.6.

HRMS (ESI)  $m/z$  calculated for  $\text{C}_{25}\text{H}_{26}\text{N}_3\text{O}_2\text{S}$   $[\text{M}+\text{H}]^+$ : 432.1740, found: 432.1742.

**2-(diethylamino)ethyl 4-(2-methyl-4-((4-methylphenyl)sulfonamido)-3-phenyl-1H-pyrrol-1-yl)benzoate (3ax)**

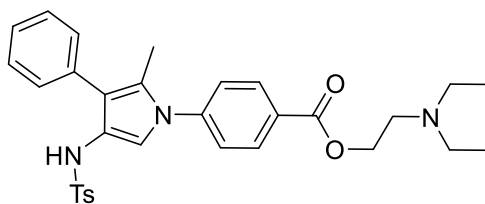

**3ax**

The title compound was prepared from **1a** (76.6 mg, 0.2 mmol, 1 eq.) and **2x** (70.8 mg, 0.3 mmol, 1.5 eq.) via general procedure. Purified by silica gel column chromatography (eluent: EtOAc/PE = 1:3) furnished **3ax** (78.5 mg, 72% yield) as colorless solid.

**<sup>1</sup>H NMR** (300 MHz, CDCl<sub>3</sub>) δ 8.20-8.09 (m, 2H), 7.57-7.50 (m, 2H), 7.43-7.35 (m, 2H), 7.29 (s, 2H), 7.16 (d, *J* = 8.1 Hz, 2H), 6.97 (s, 1H), 6.85 (dd, *J* = 7.6, 1.9 Hz, 2H), 6.09 (s, 1H), 4.43 (t, *J* = 6.2 Hz, 2H), 2.89 (t, *J* = 6.2 Hz, 2H), 2.66 (q, *J* = 7.1 Hz, 4H), 2.40 (s, 3H), 2.09 (s, 3H), 1.10 (t, *J* = 7.1 Hz, 7H).

**<sup>13</sup>C NMR** (75 MHz, CDCl<sub>3</sub>) δ 165.9, 143.6, 140.8, 136.3, 133.0, 130.9, 129.7, 129.5, 128.8, 128.1, 127.4, 126.9, 125.2, 124.8, 119.6, 119.4, 114.8, 63.6, 57.7, 51.3, 48.0, 39.3, 21.7, 12.0.

**HRMS** (ESI) *m/z* calculated for C<sub>31</sub>H<sub>36</sub>N<sub>3</sub>O<sub>4</sub>S [M+H]<sup>+</sup>: 546.2421, found: 546.2424.

### Determined the configuration **3aa** by X-ray

**X-ray of 3aa** (method of crystallization: in a 20 mL tube, the compound **3aa** (100 mg) was dissolved in a mixture n-hexane/CH<sub>2</sub>Cl<sub>2</sub> (10 mL:3 mL). The tube was sealed with a septum and a needle was inserted into the septum in order to slowly evaporation of CH<sub>2</sub>Cl<sub>2</sub>). Thermal ellipsoids are shown at the 50% level.

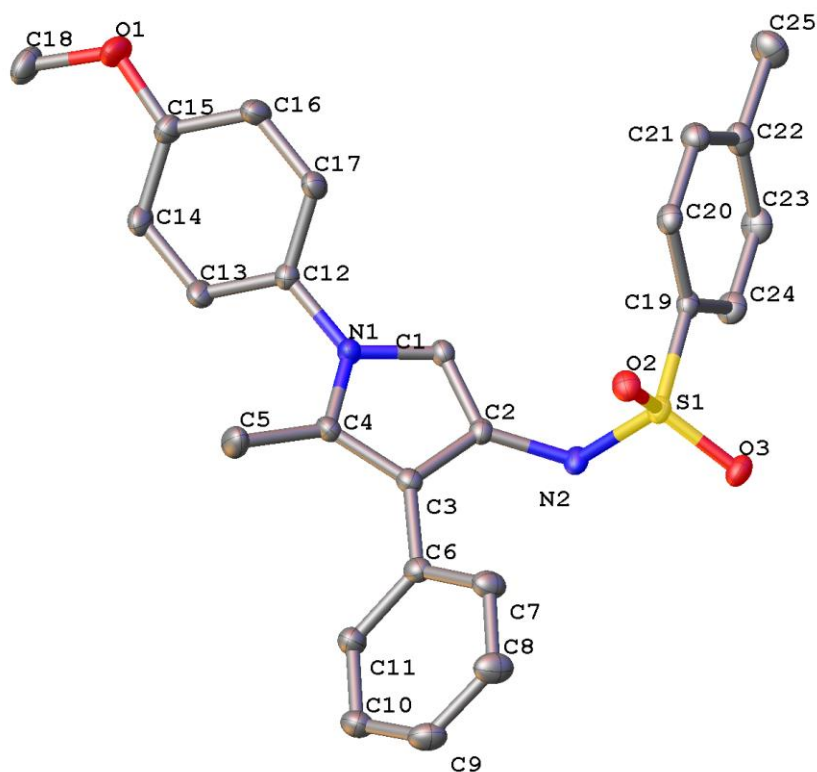

### Crystallographic data of **3aa**

|                     |                                                                 |
|---------------------|-----------------------------------------------------------------|
| Empirical formula   | C <sub>25</sub> H <sub>24</sub> N <sub>2</sub> O <sub>3</sub> S |
| Formula weigh       | 432.52                                                          |
| Wavelength          | 1.34139                                                         |
| Crystal system      | monoclinic                                                      |
| Space group         | P21                                                             |
| a (Å)               | 9.04750(10)                                                     |
| b (Å)               | 10.4700(2)                                                      |
| c (Å)               | 12.6844(2)                                                      |
| α (°)               | 70.9370(10)                                                     |
| β (°)               | 82.2400(10)                                                     |
| γ (°)               | 84.1790(10)                                                     |
| V (Å <sup>3</sup> ) | 1123.16(3)                                                      |
| Z                   | 2                                                               |
| Temperature/K       | 173                                                             |
| F (000)             | 456                                                             |

|                                                |                           |
|------------------------------------------------|---------------------------|
| Crystal size/mm <sup>3</sup>                   | 0.17x0.17x0.05            |
| $\theta$ min, $\theta$ max (deg)               | 3.894, 54.991             |
| Reflections collected                          | 17147                     |
| Independent reflections                        | 4221                      |
| Data/restraints/parameters                     | 4221 / 0 / 283            |
| Goodness-of-fit on F <sup>2</sup>              | 1.043                     |
| Final R indexes [ $I \geq 2\sigma(I)$ ]        | R1 = 0.0407, wR2 = 0.1005 |
| Final R indexes [all data]                     | R1 = 0.0504, wR2 = 0.1067 |
| Largest diff. peak and hole/ e Å <sup>-3</sup> | 0.329/-0.436              |

## Reference

- (a) L. Shen, Z. Lin, B. Guo and W. Zi, Synthesis of cycloheptanoids through catalytic enantioselective (4 + 3)-cycloadditions of 2-aminoallyl cations with dienol silyl ethers, *Nat. Synth.*, **2022**, *1*, 883; (b) L. Shen, Y. Zheng, Z. Lin, T. Qin, Z. Huang and W. Zi, Copper-Catalyzed Enantioselective C1,N-Dipolar (3+2) Cycloadditions of 2-Aminoallyl Cations with Indoles, *Angew. Chem. Int. Ed.*, 2023, **62**, e202217051.

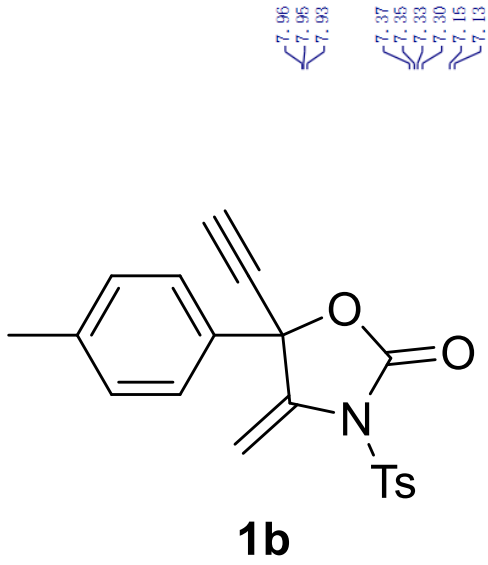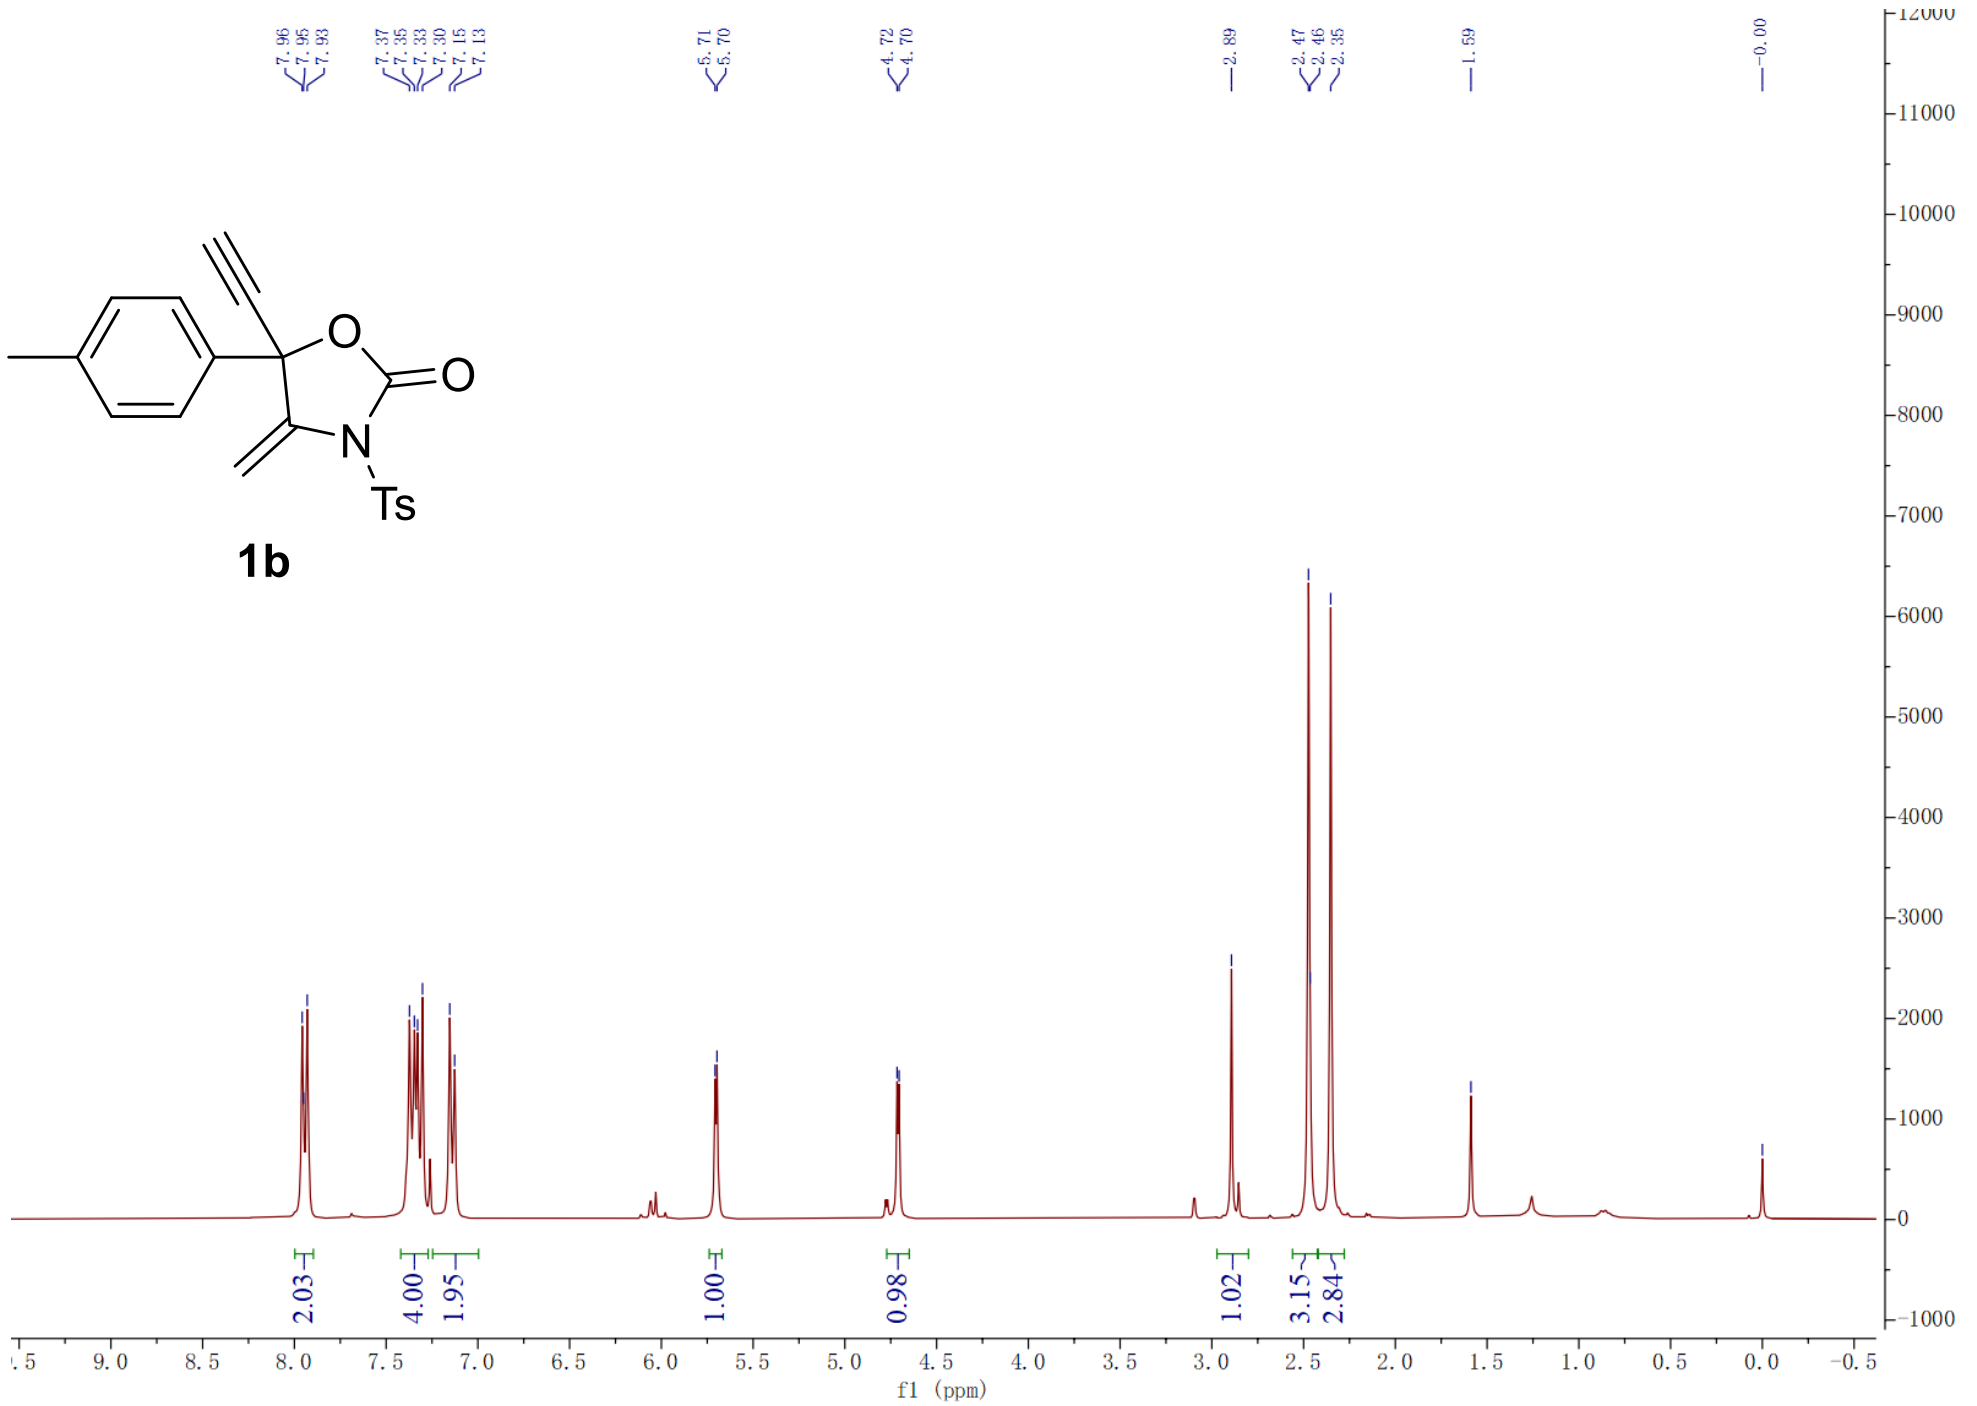

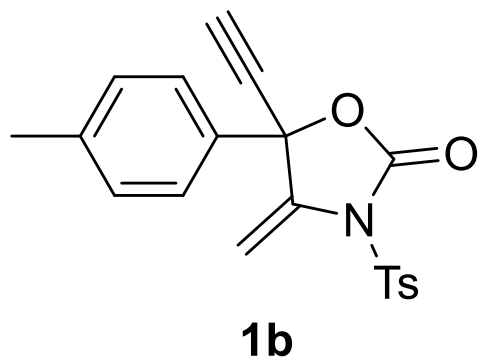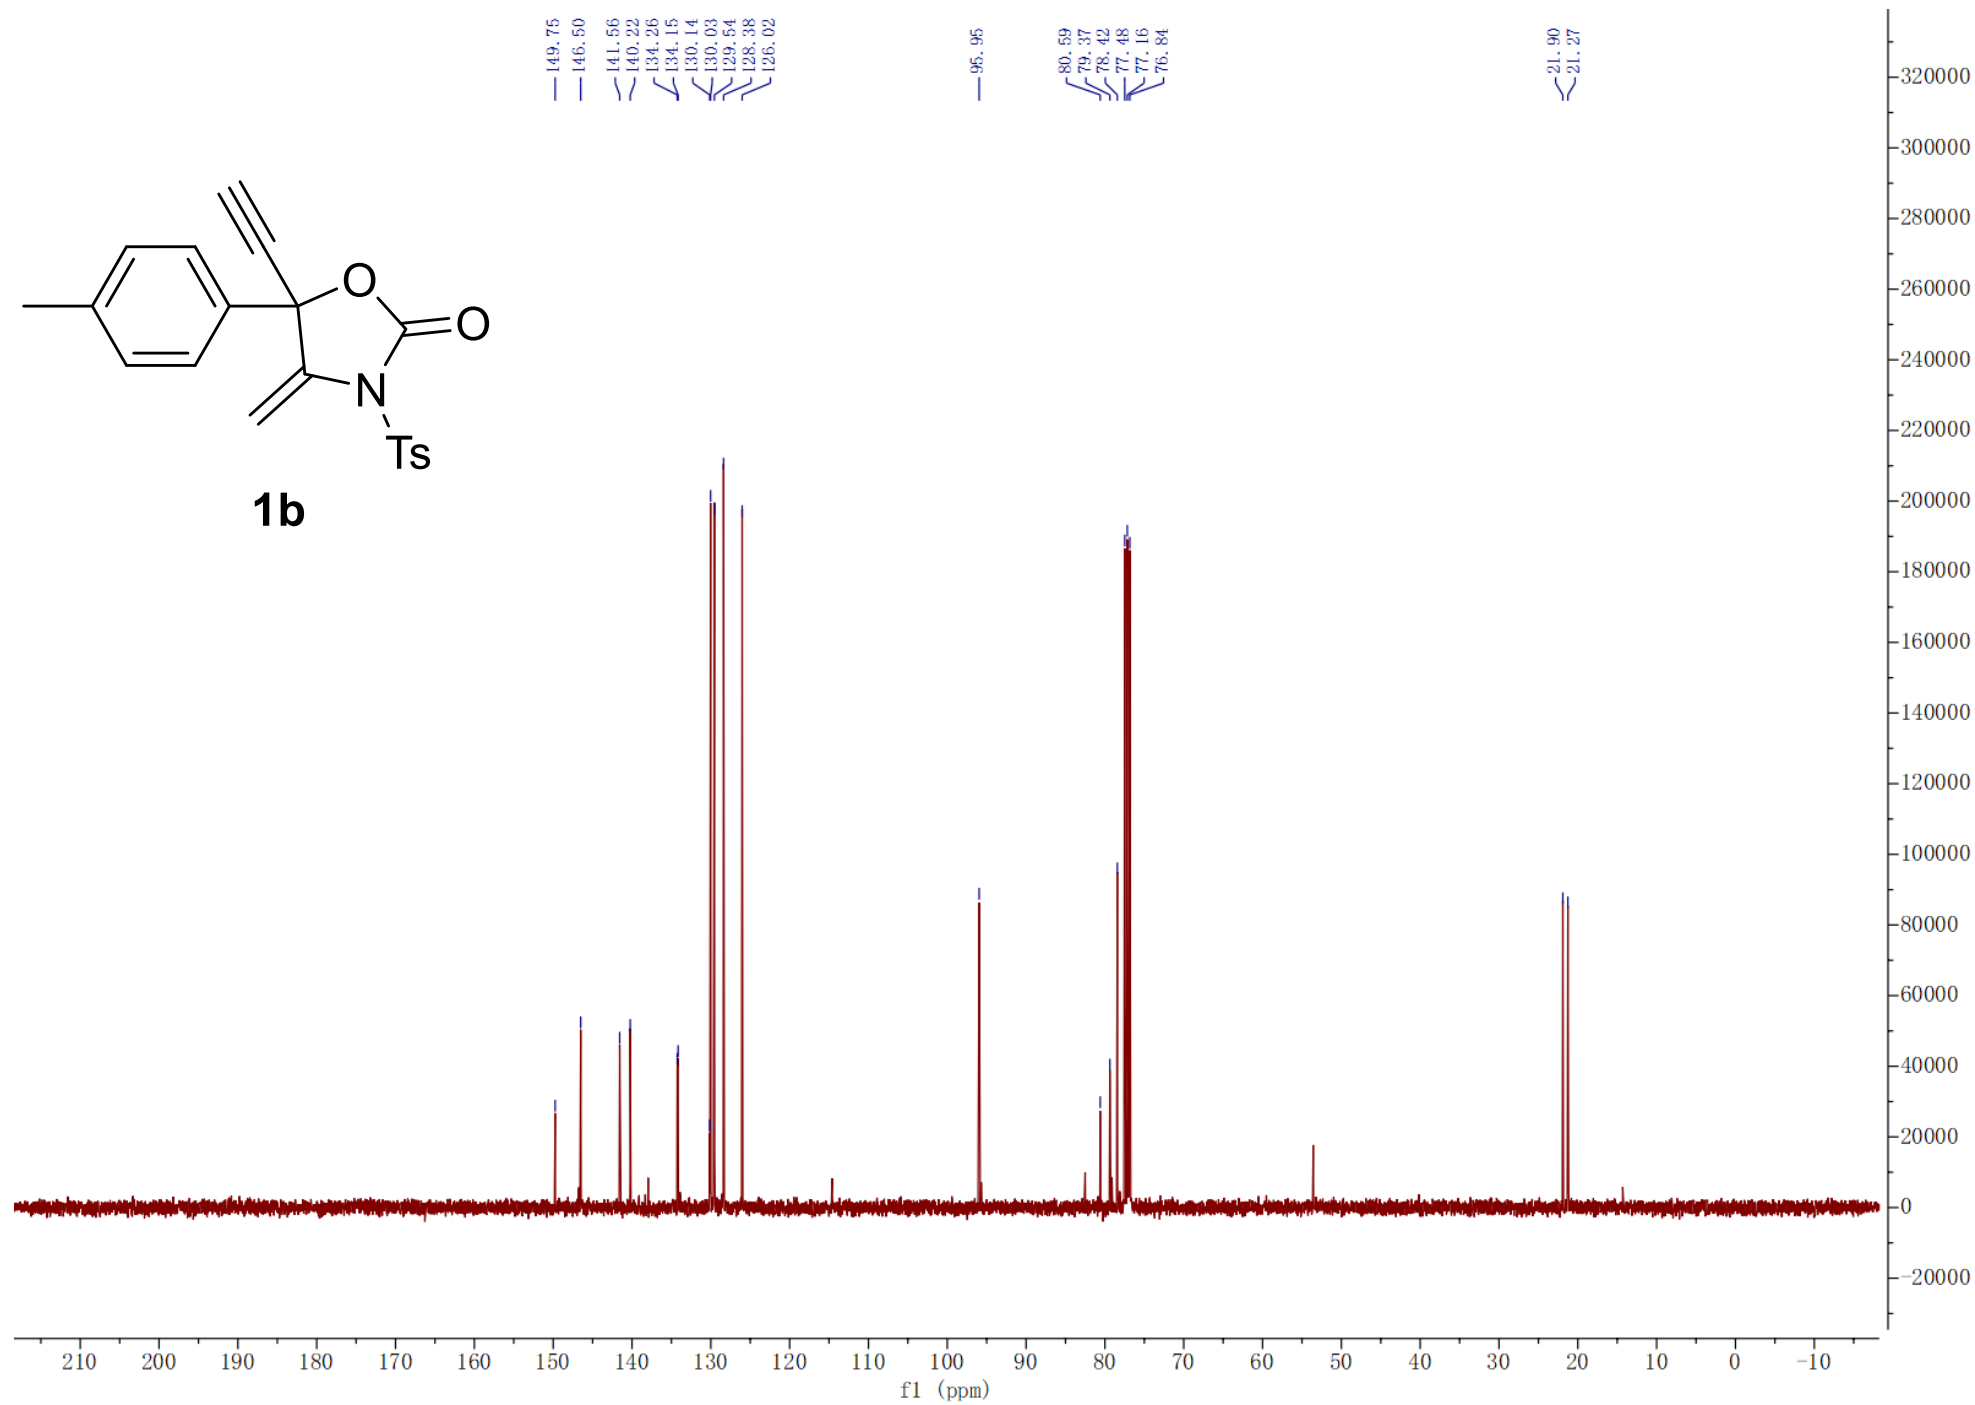

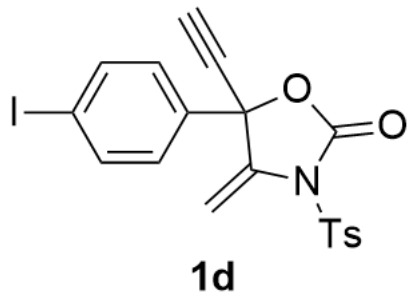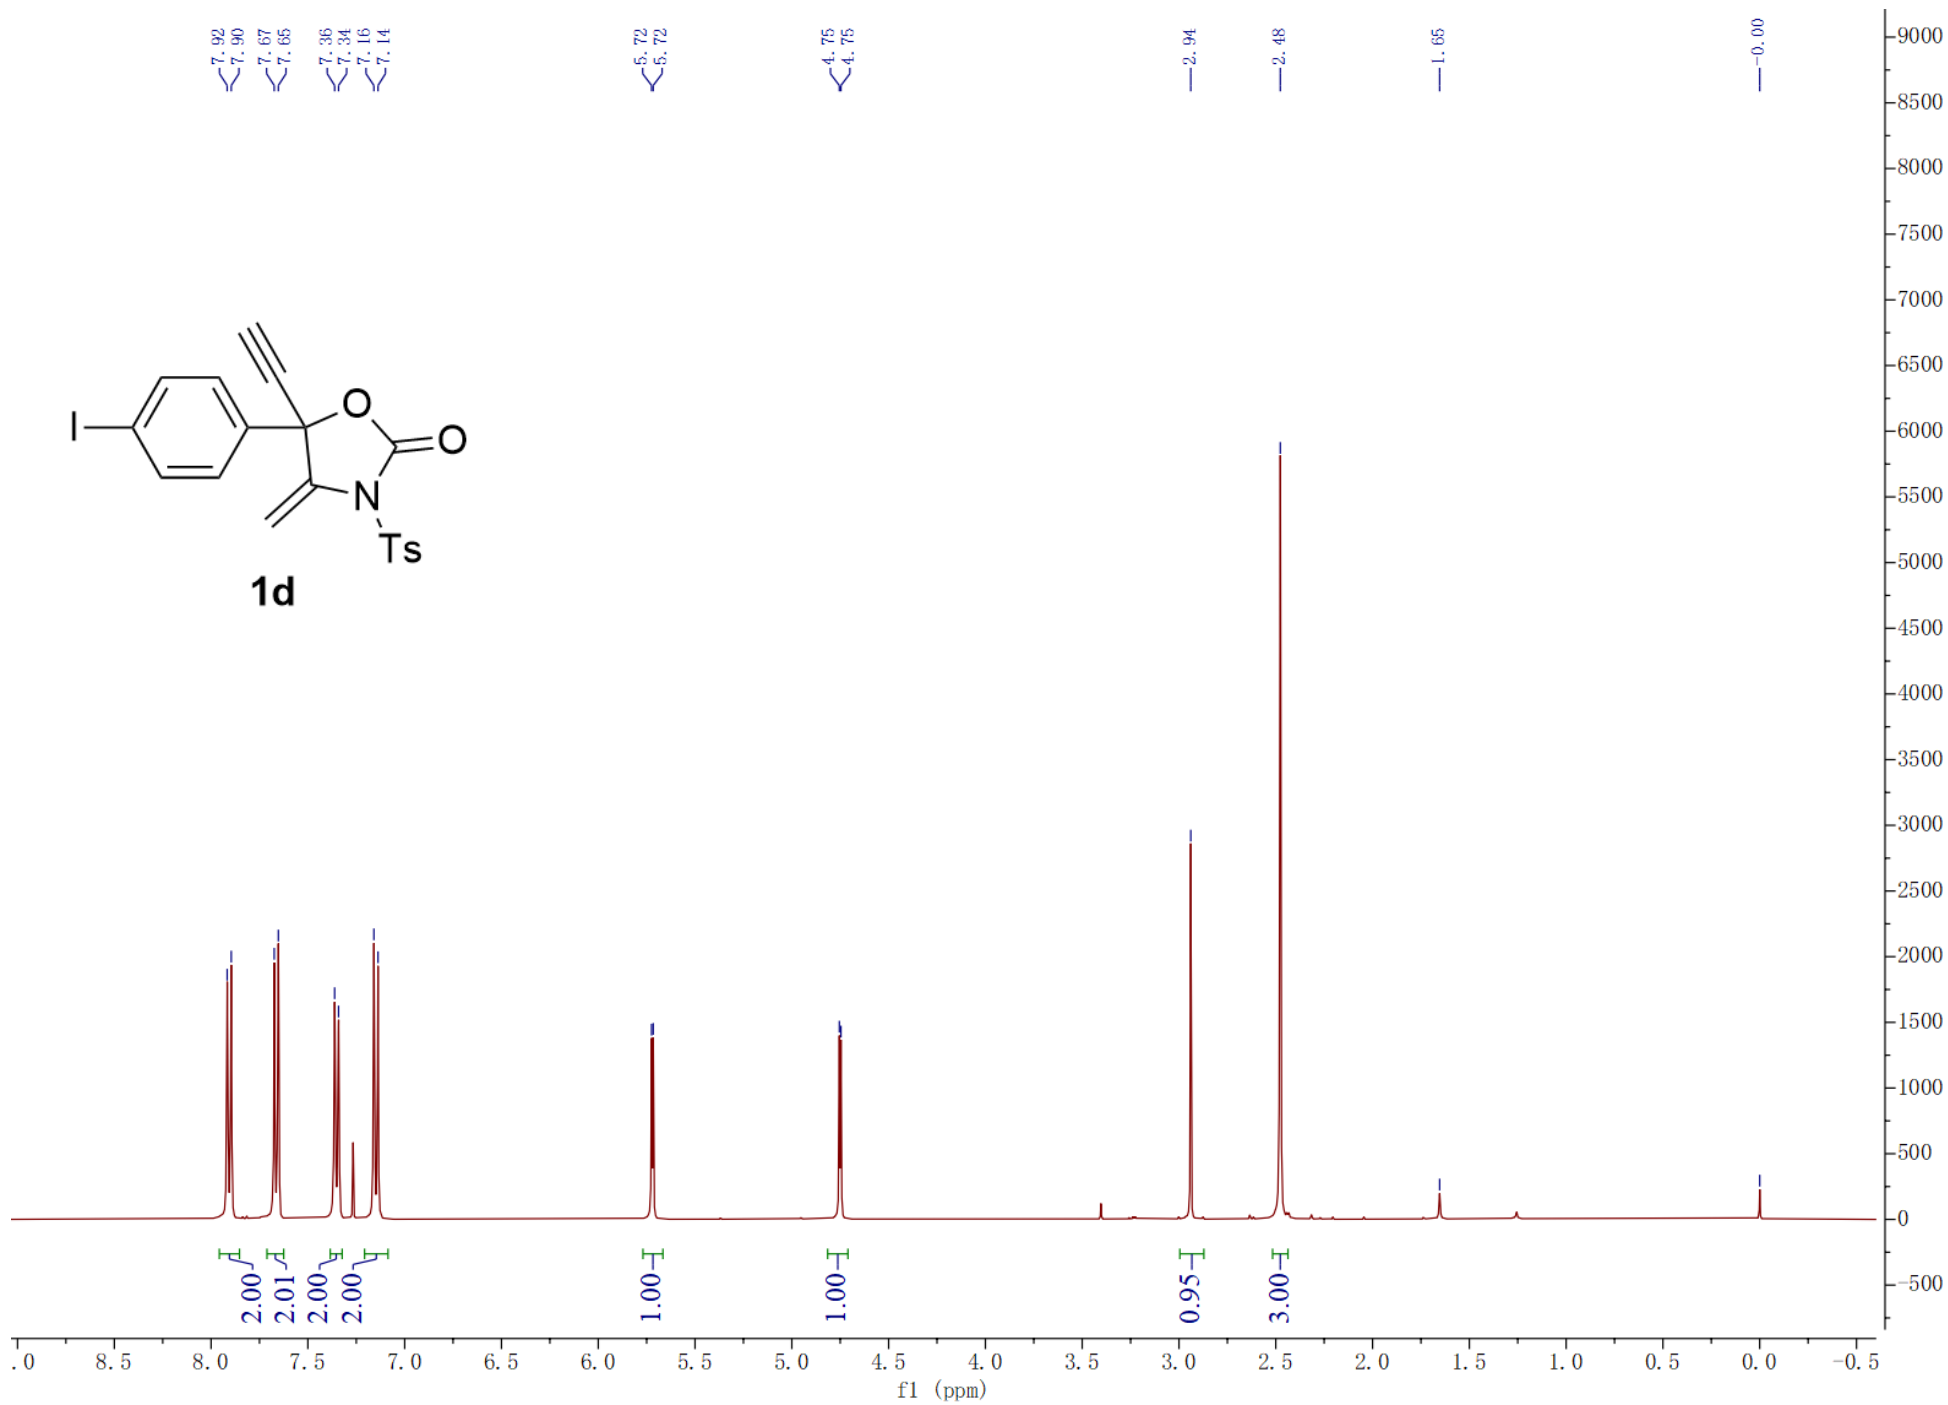



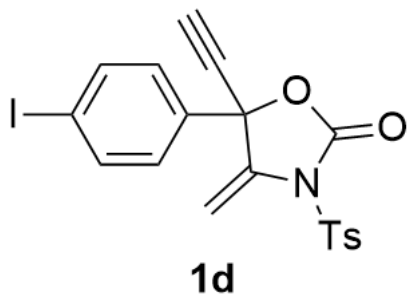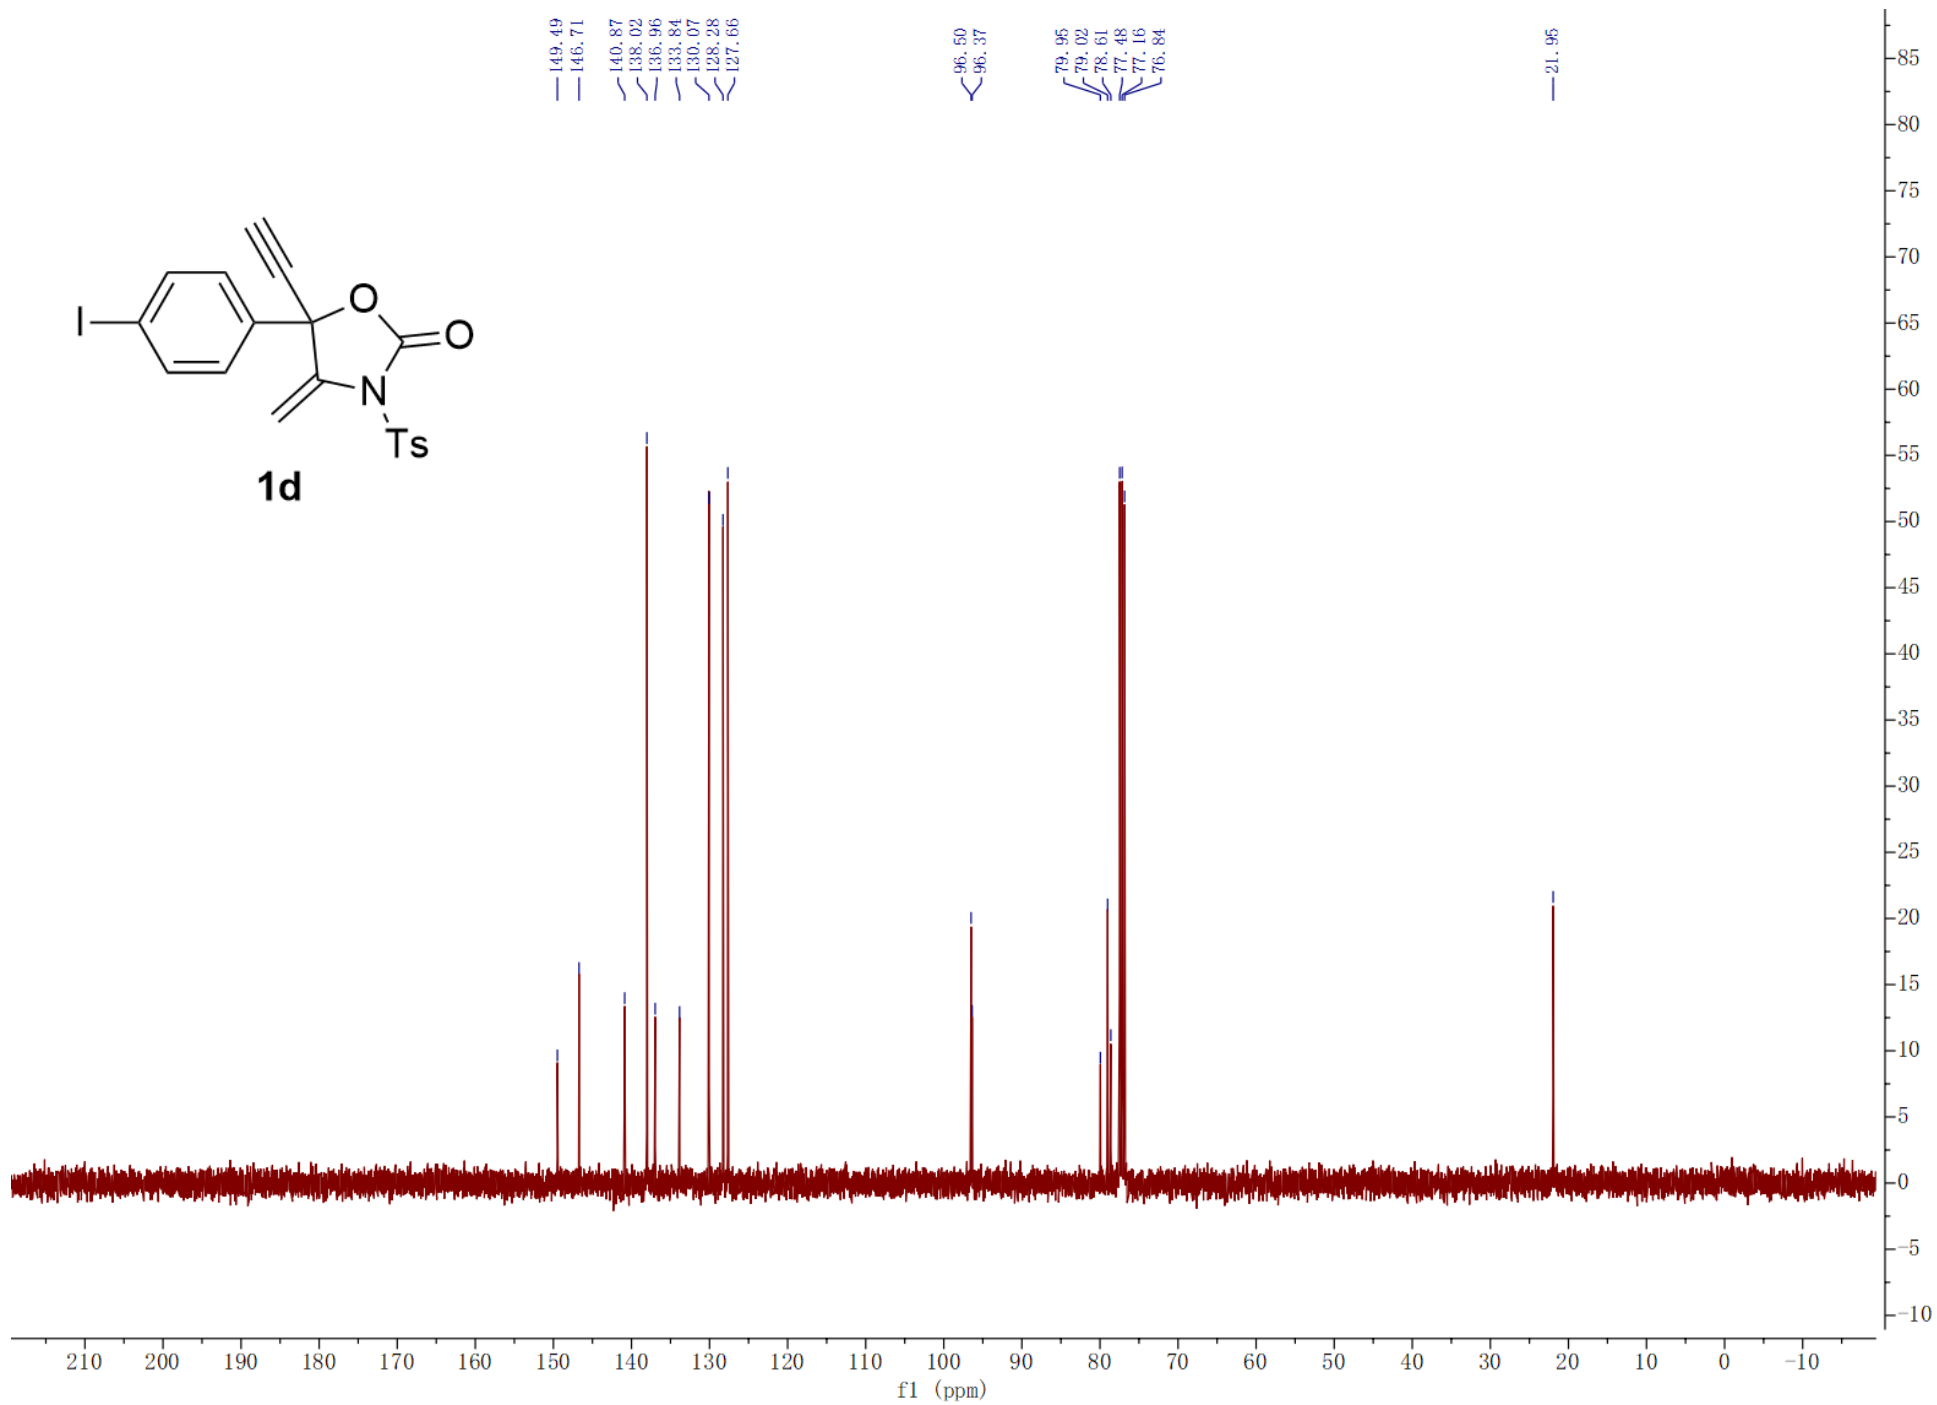

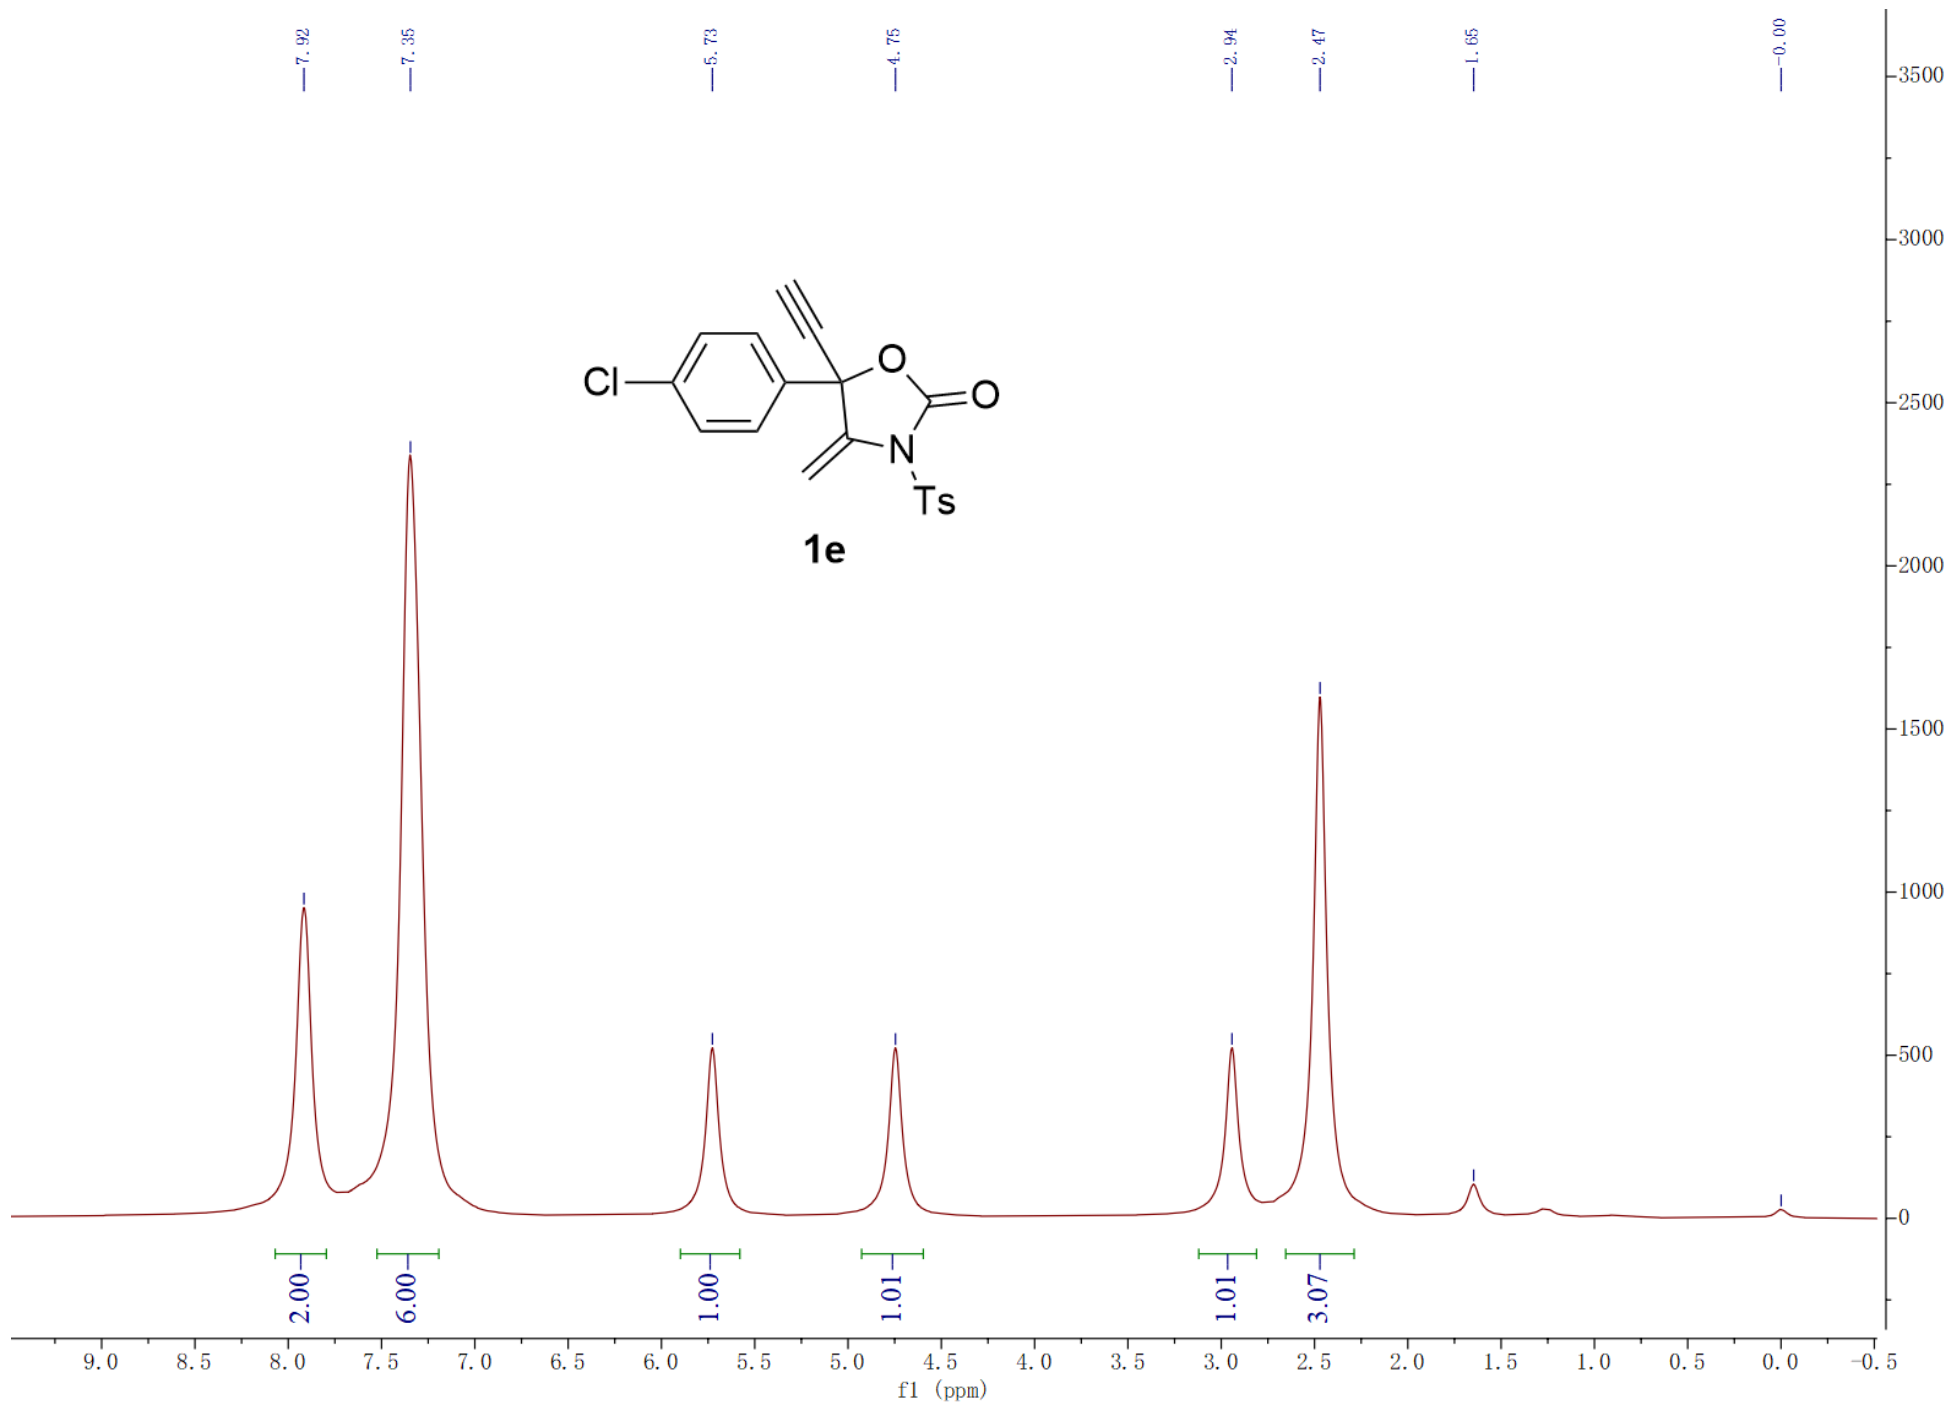

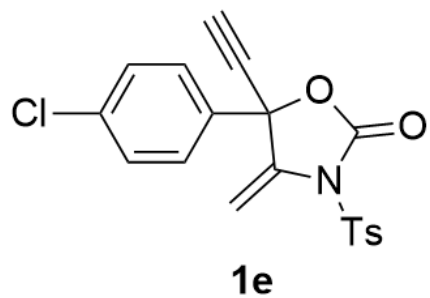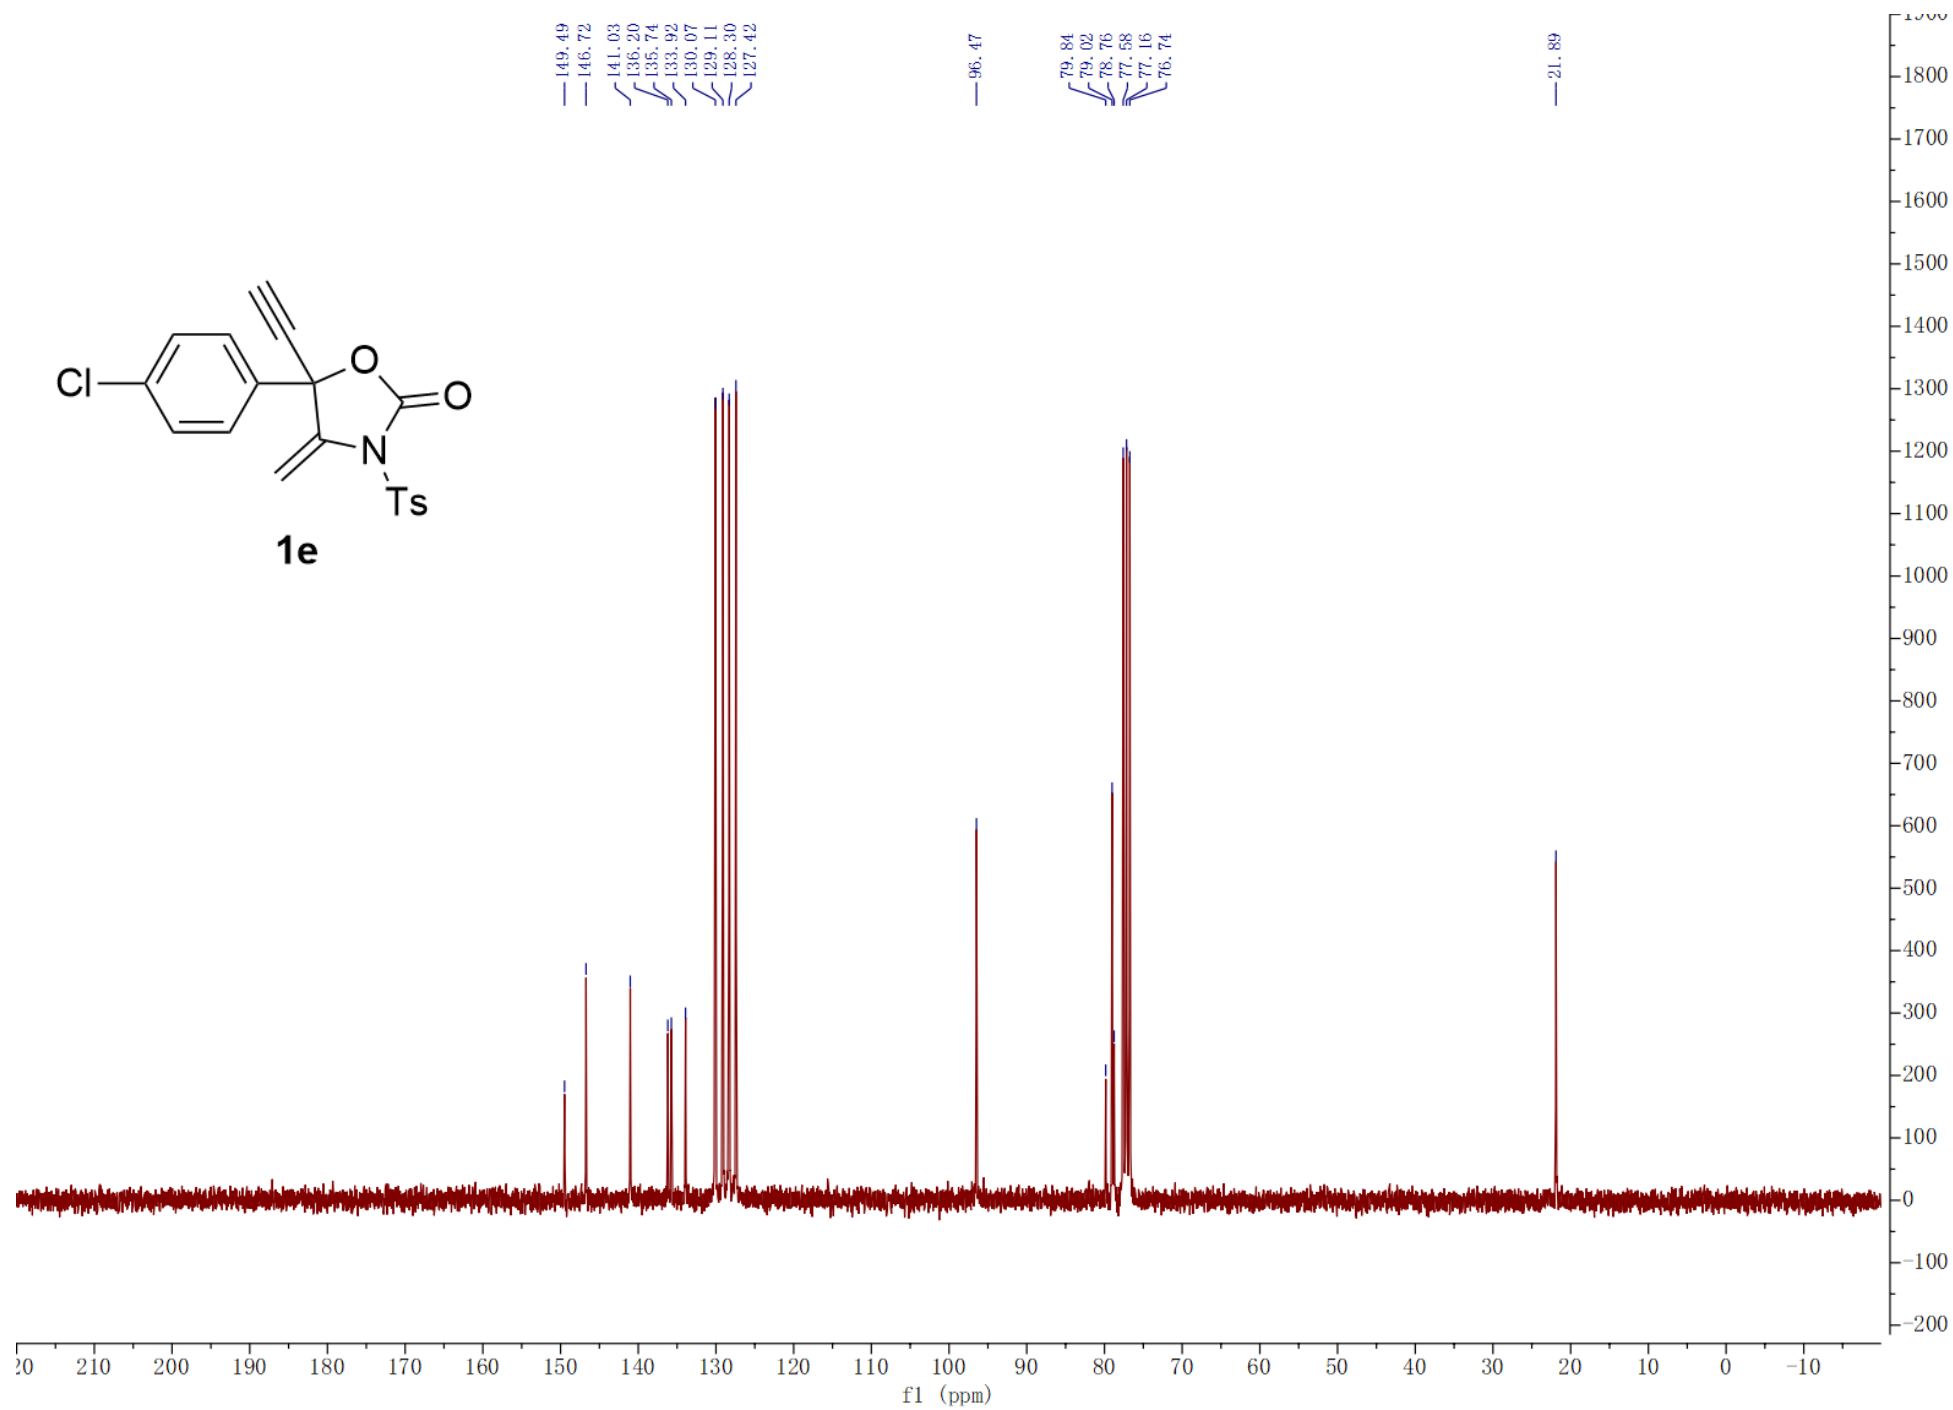

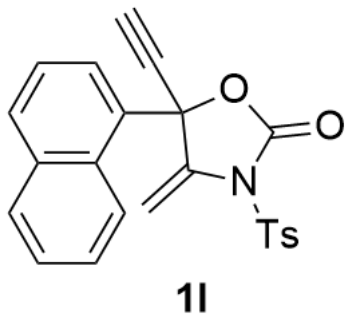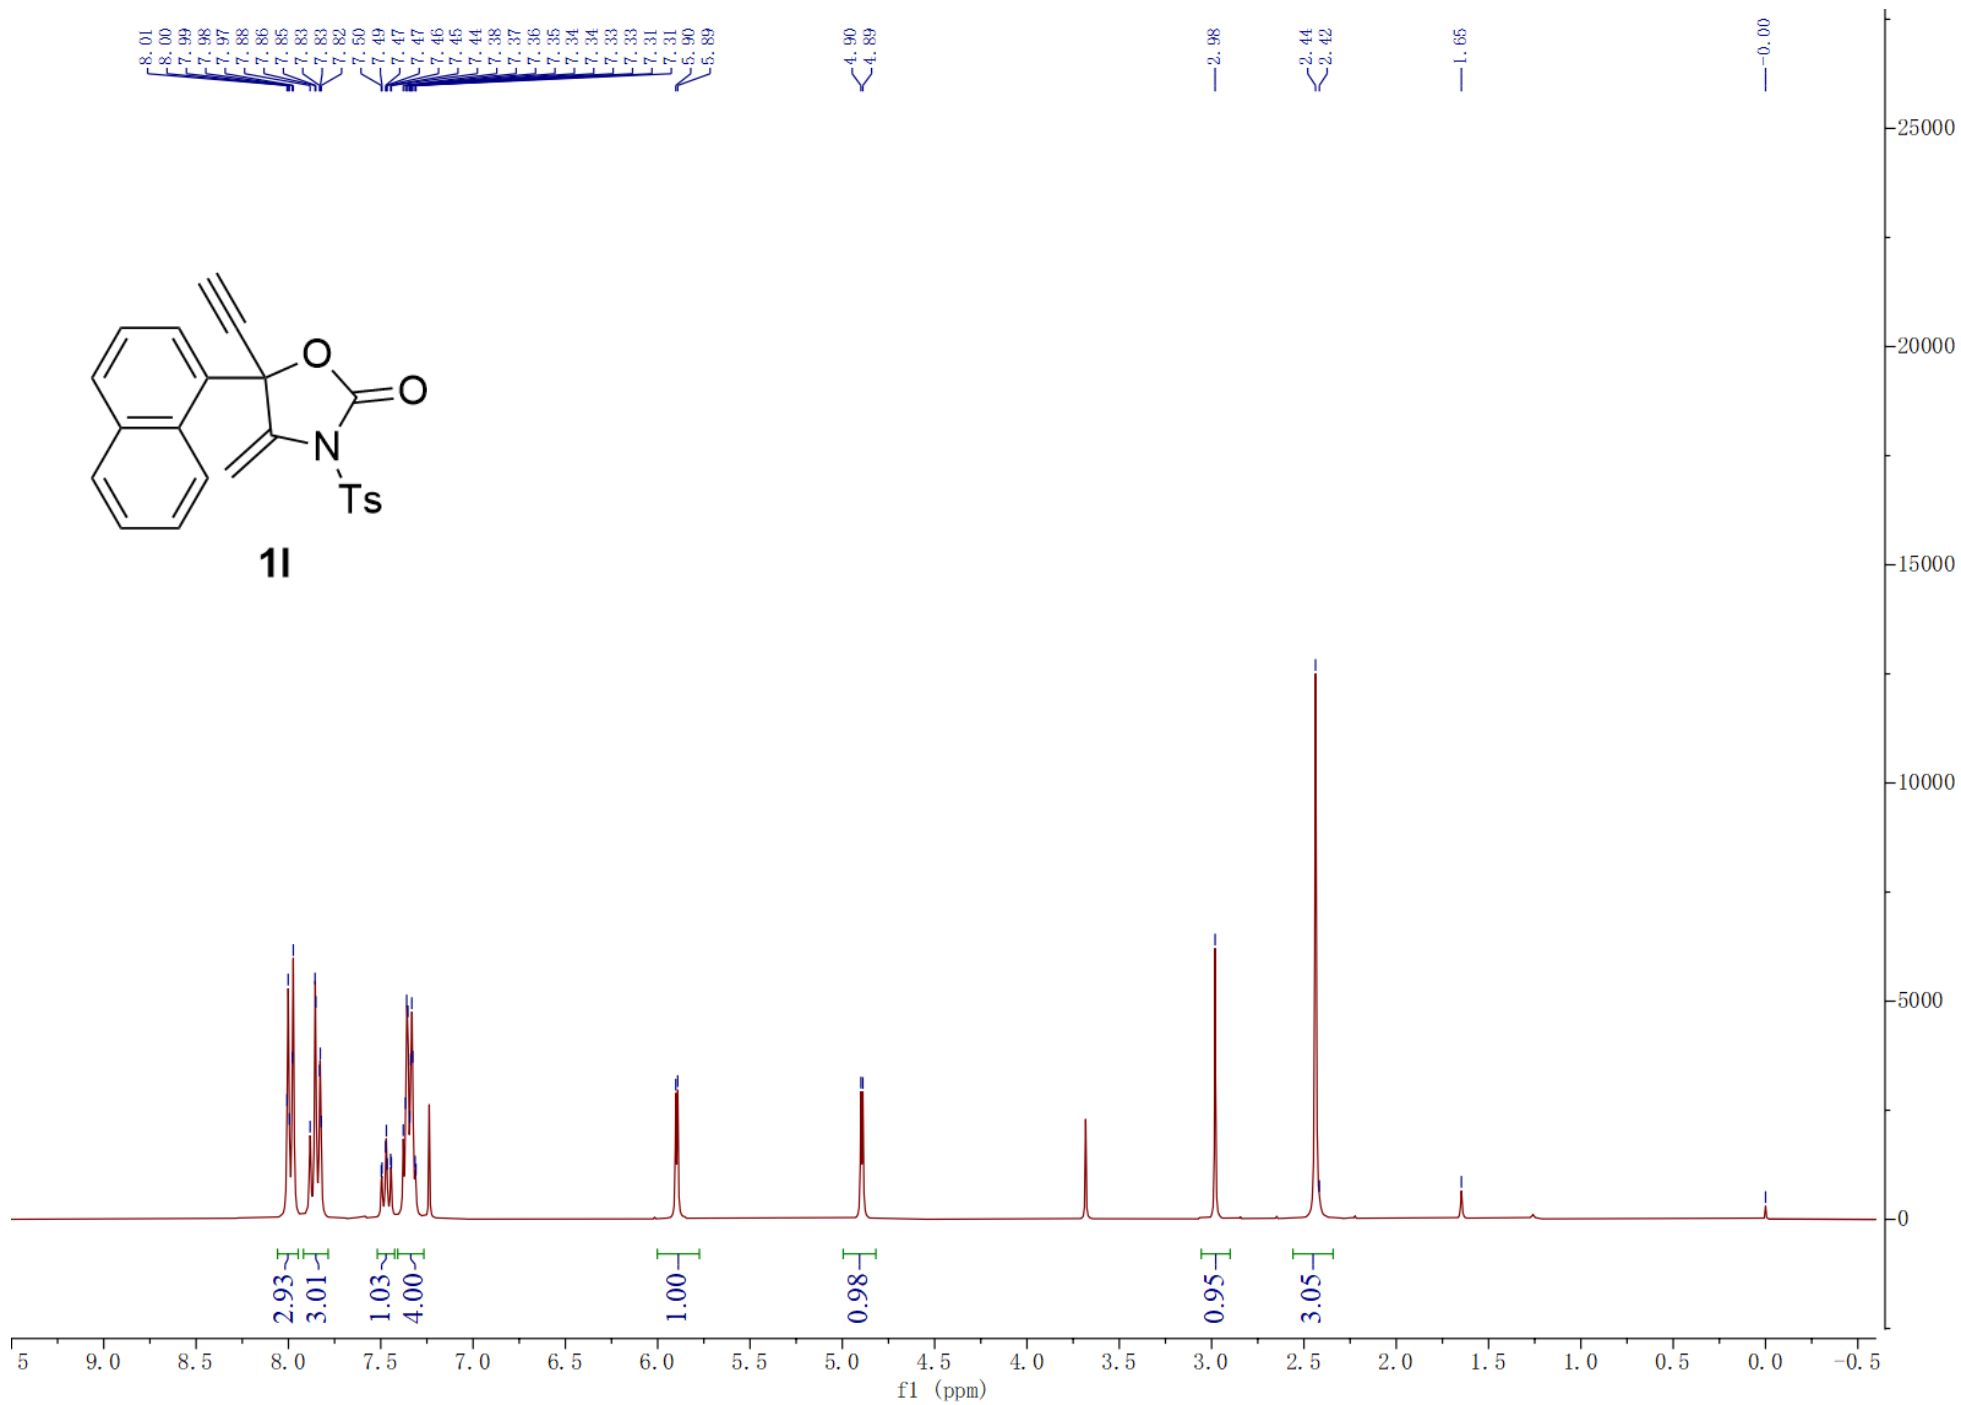

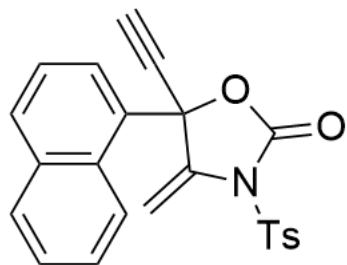

**11**

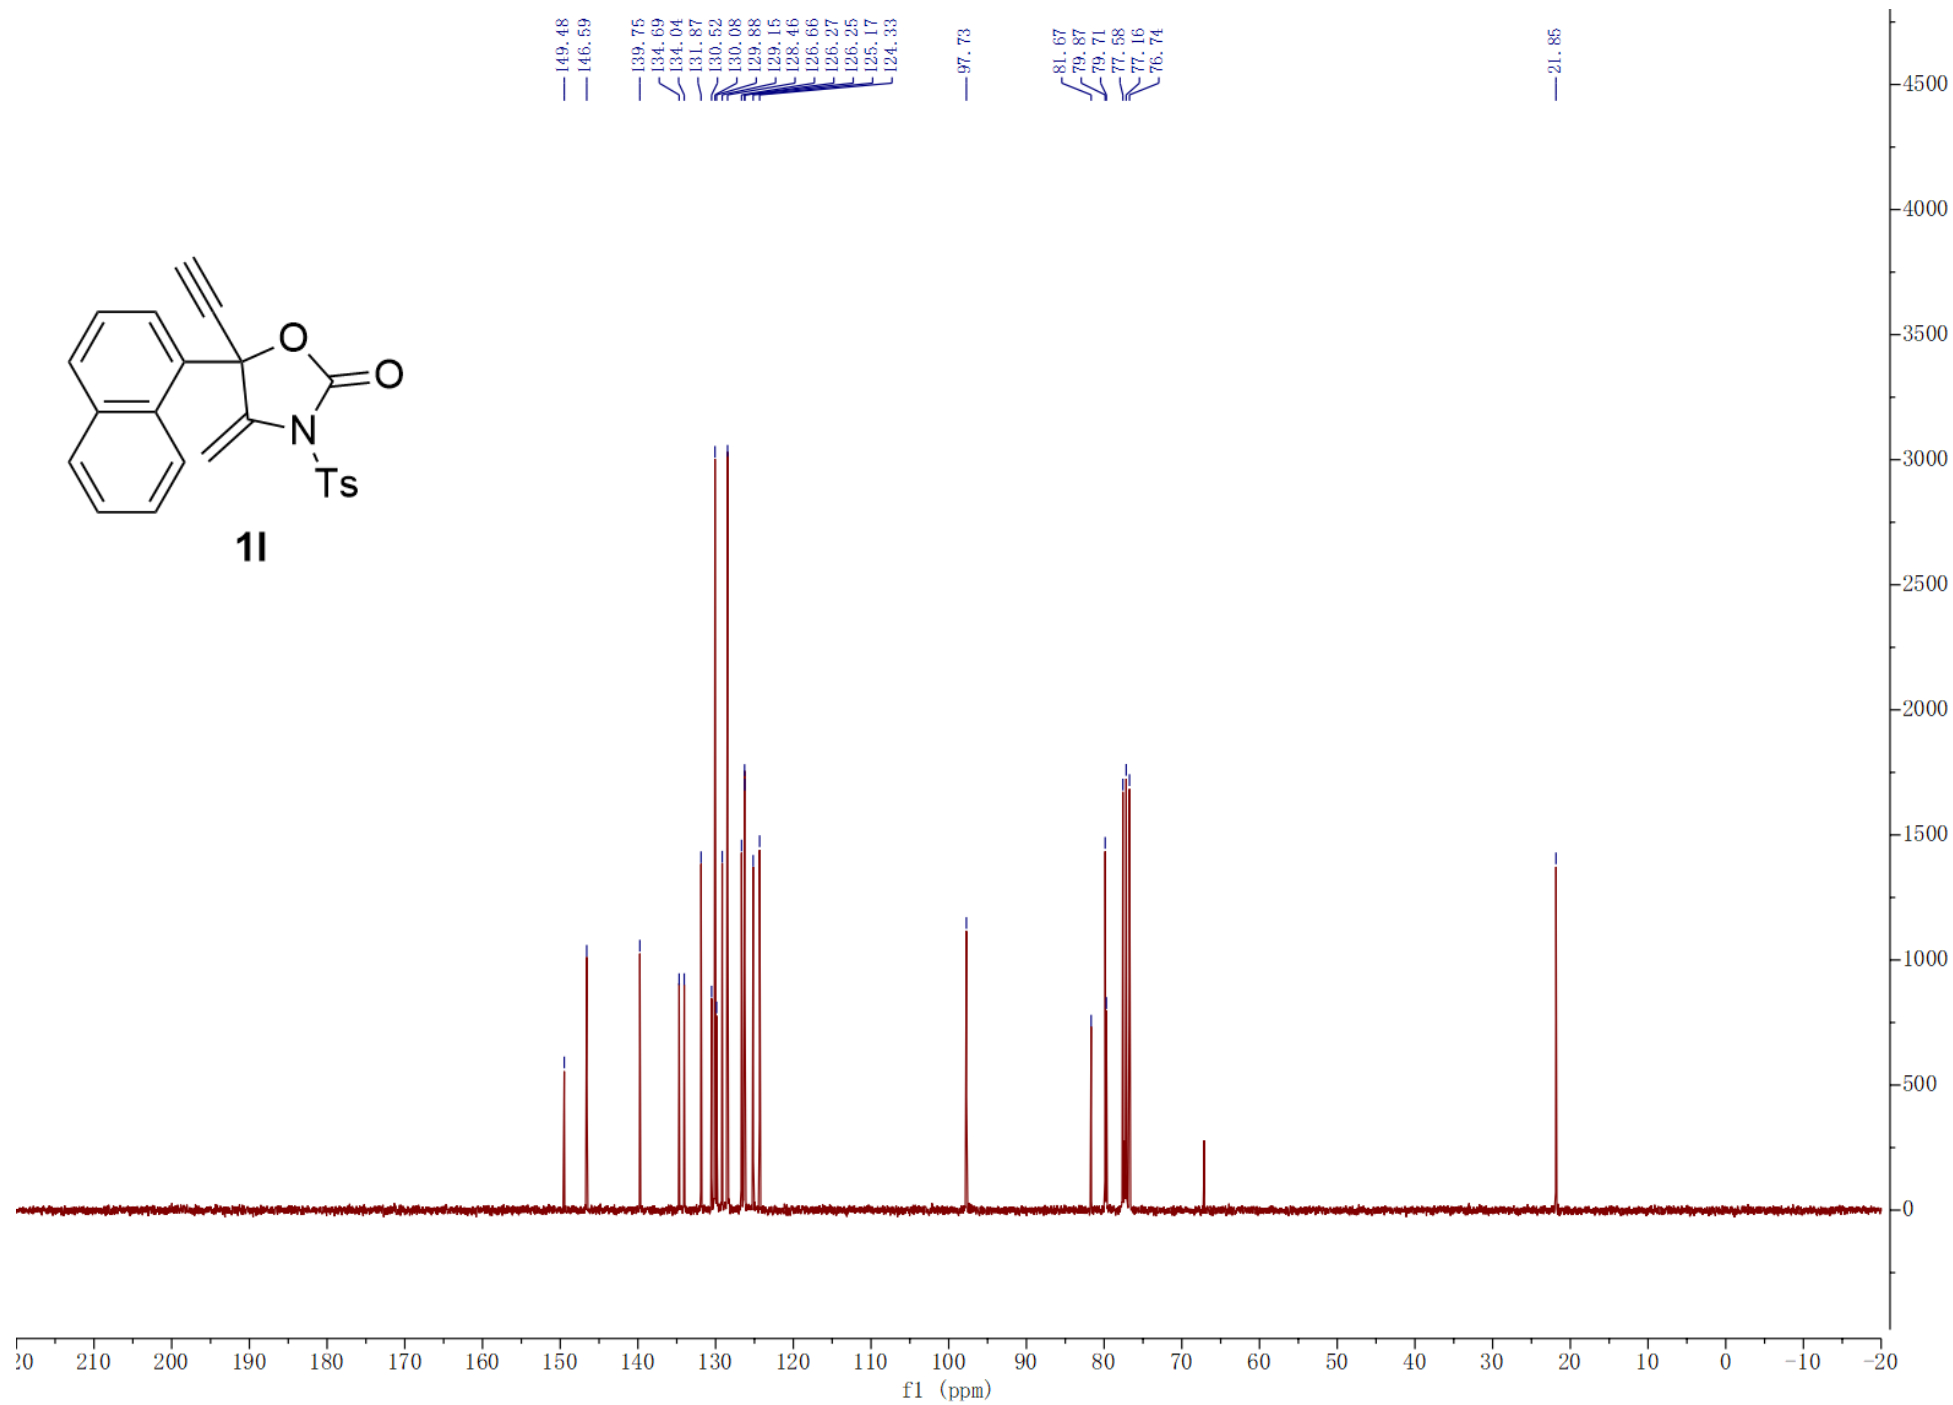

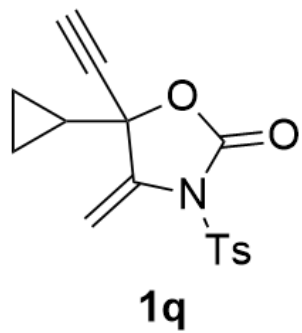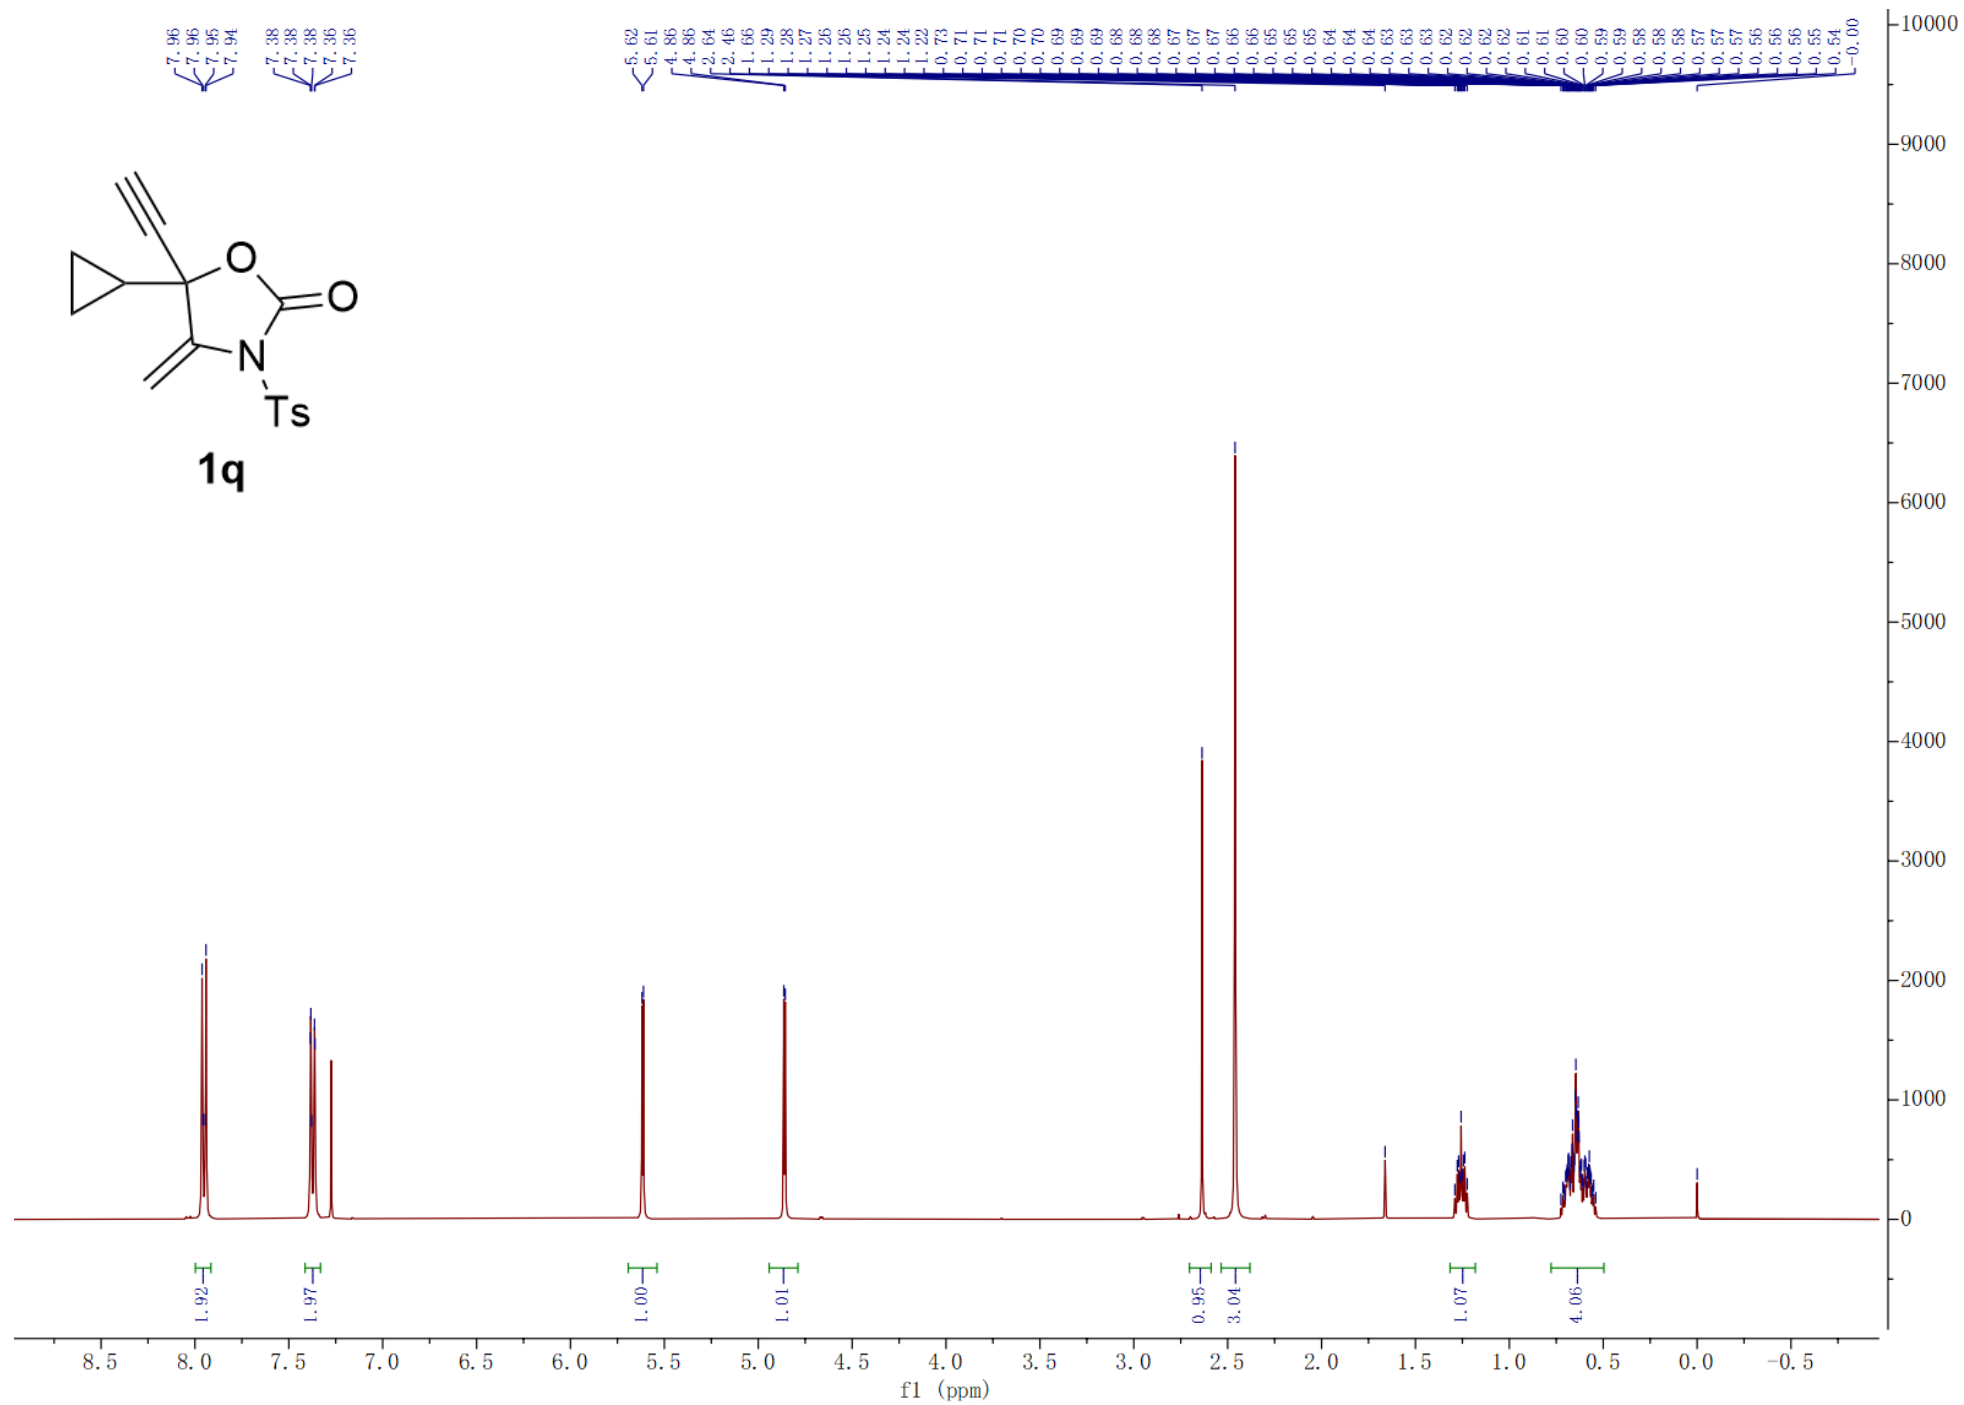

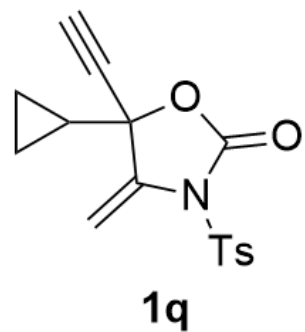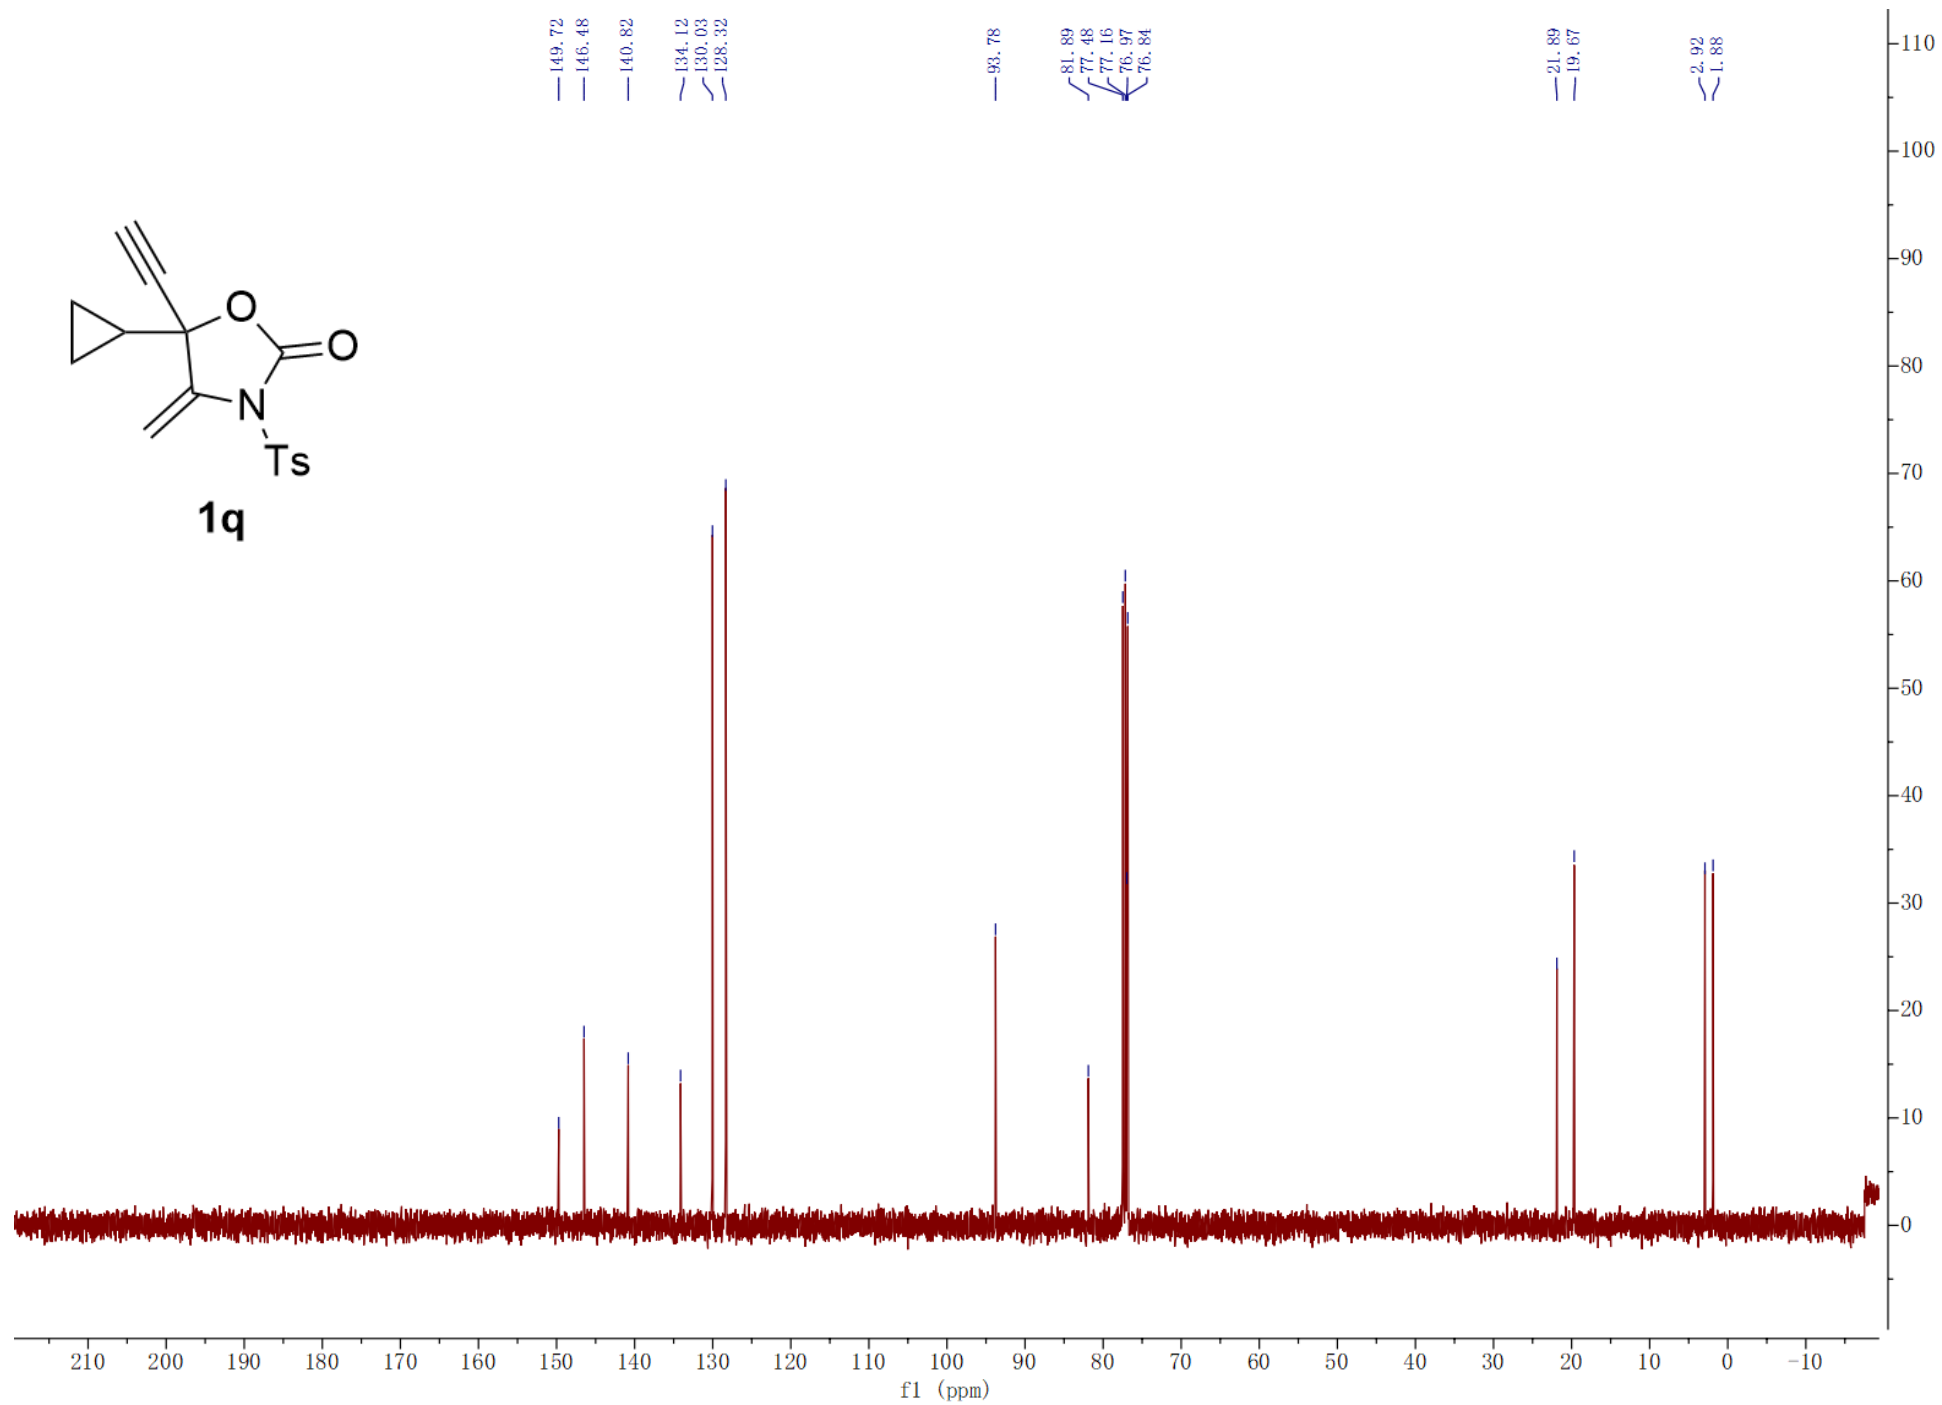

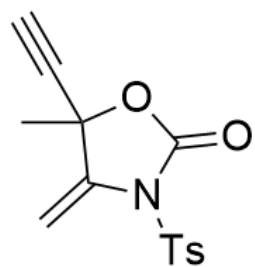

1r

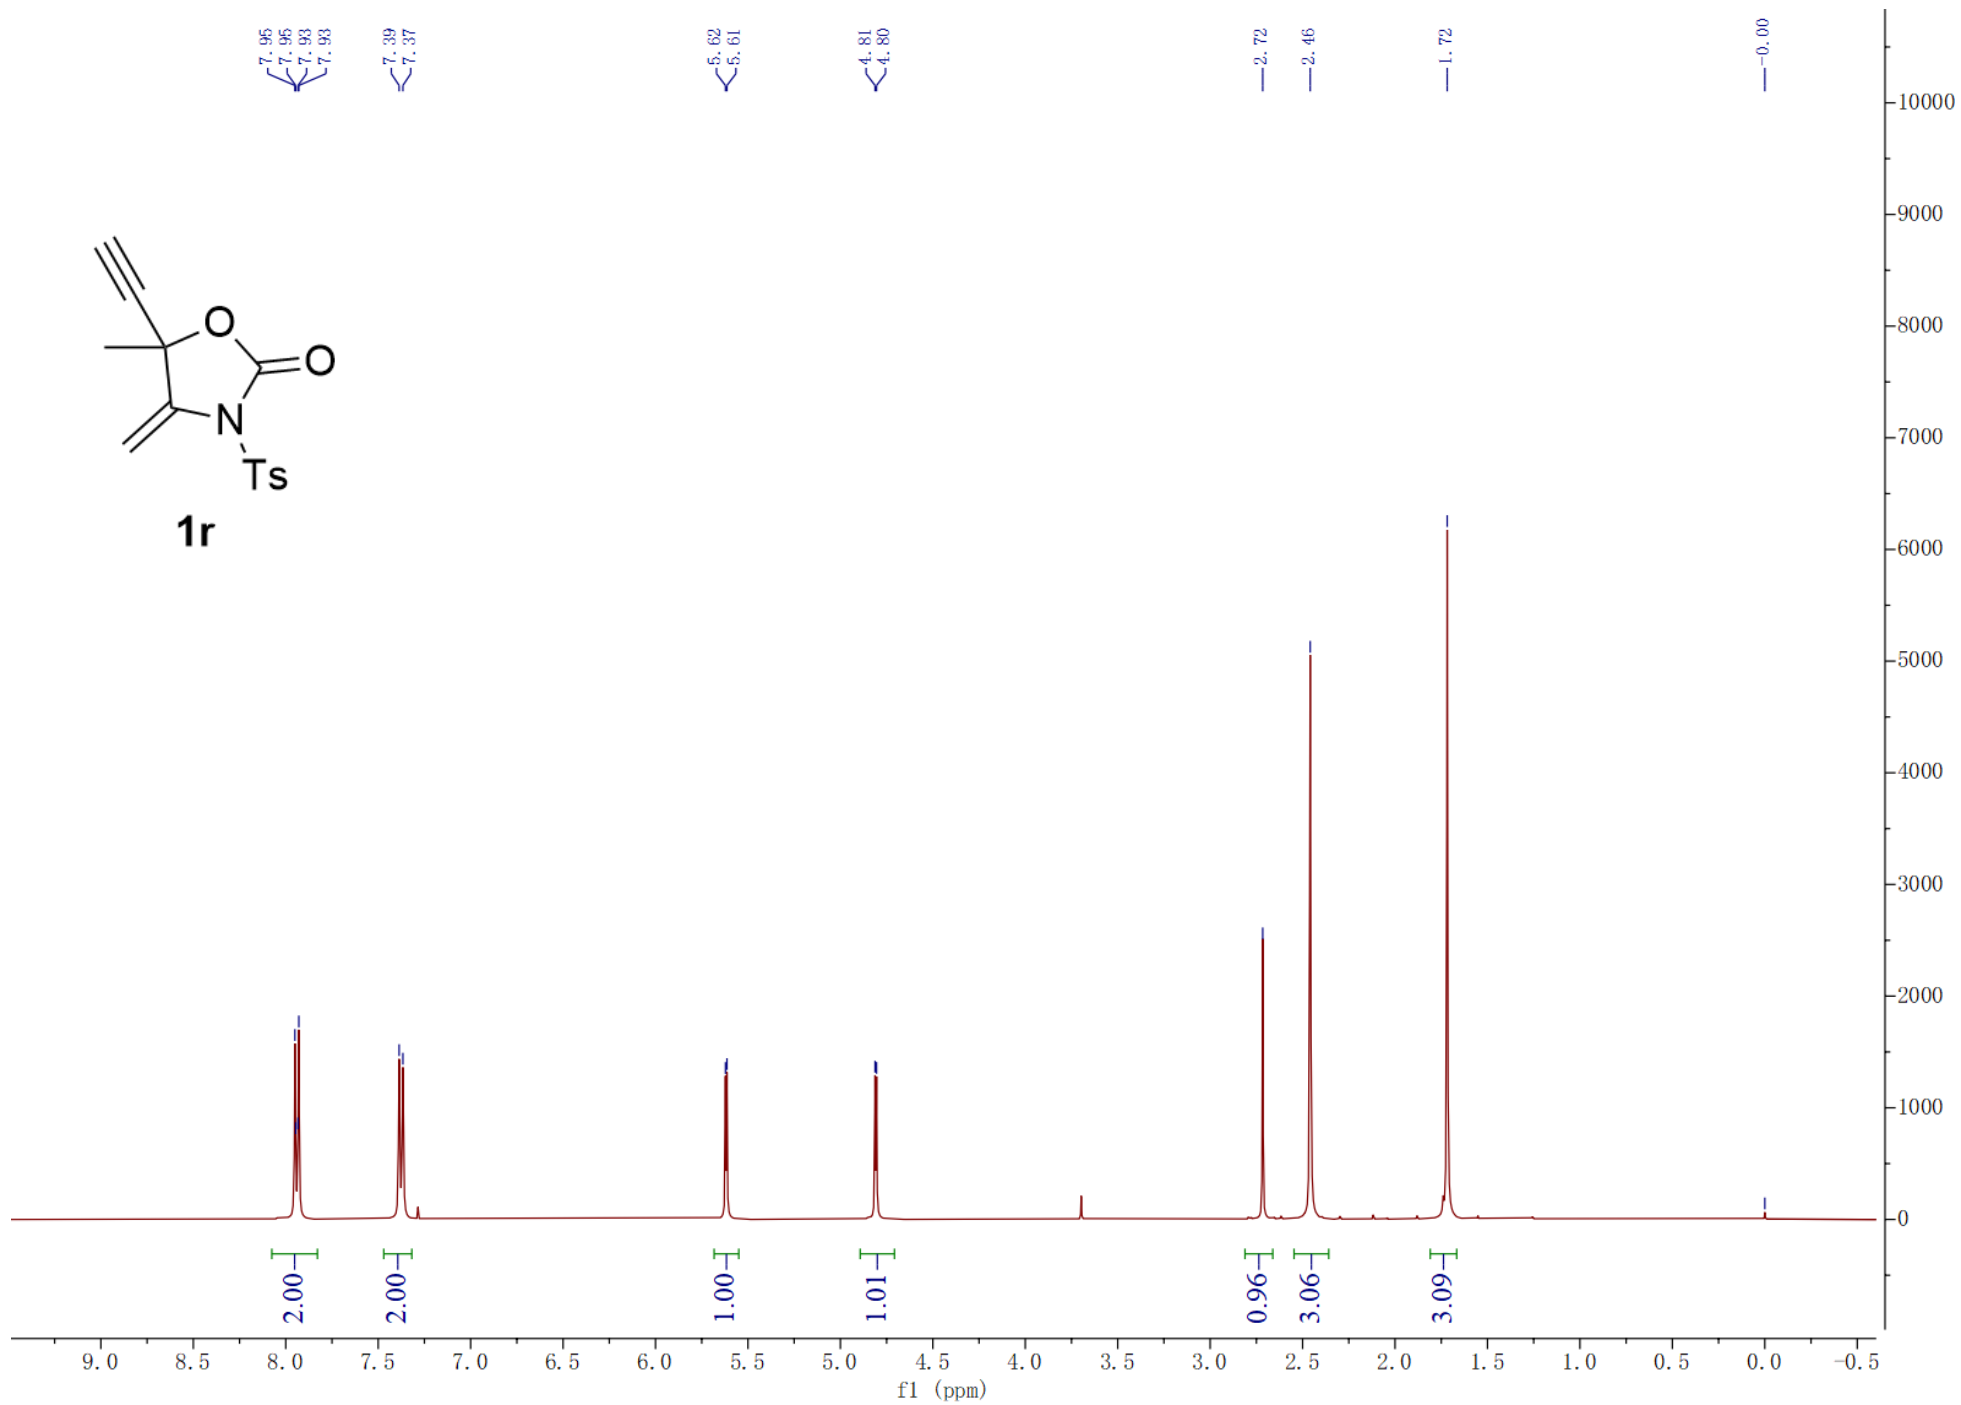



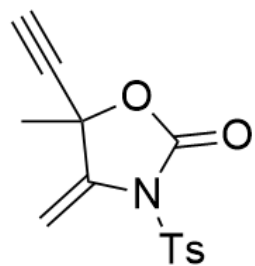

**1r**

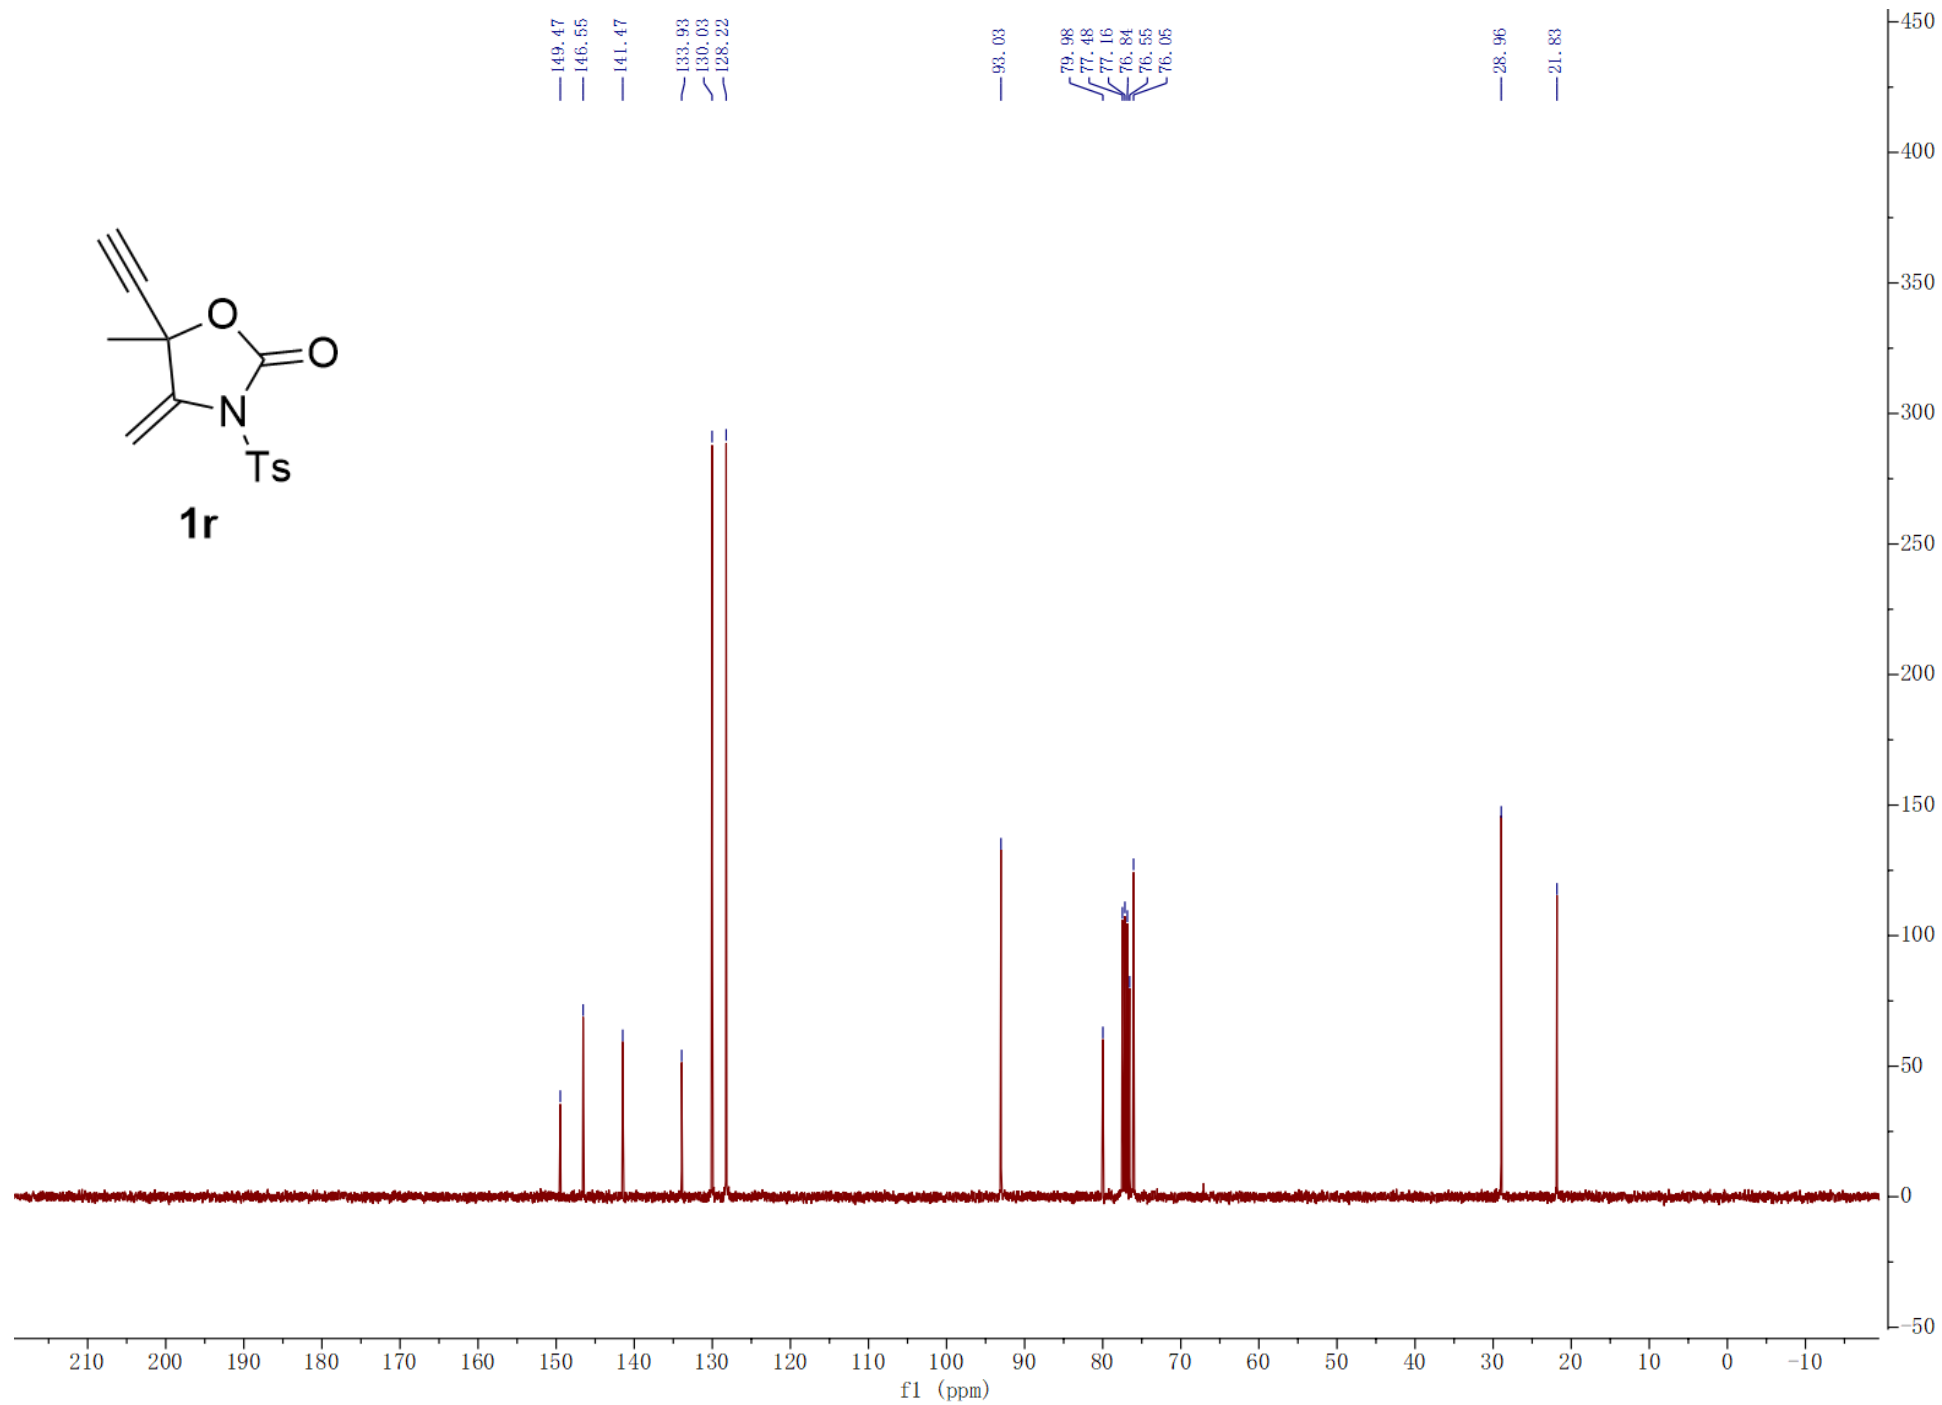

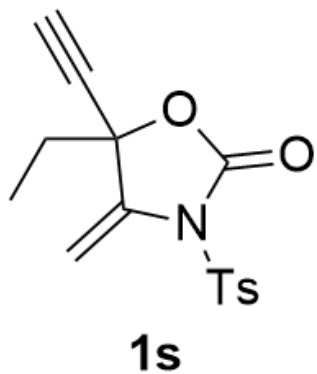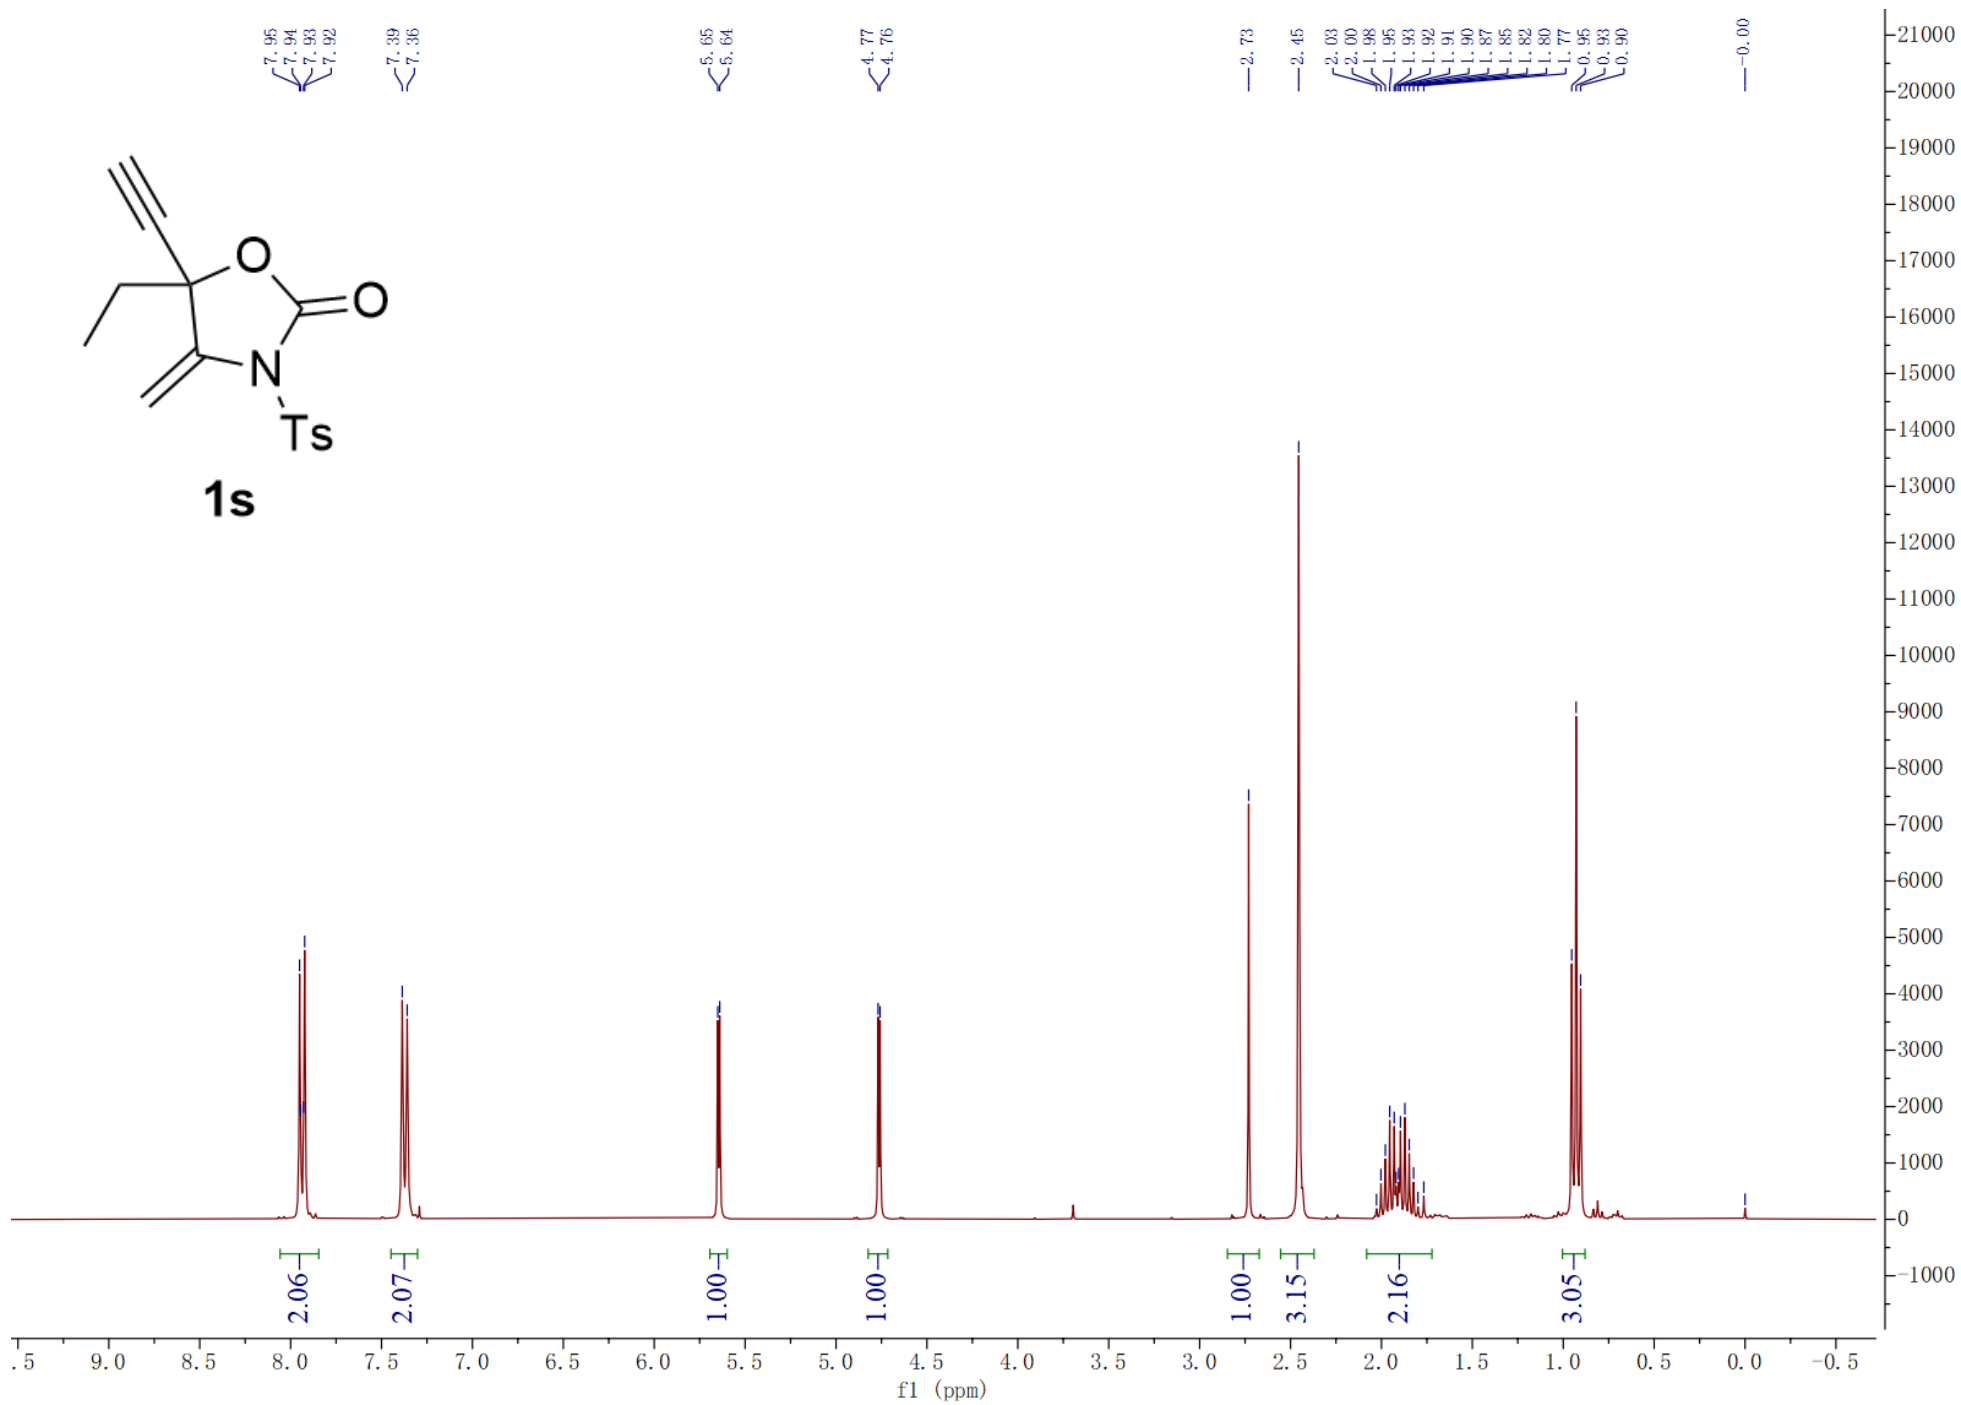

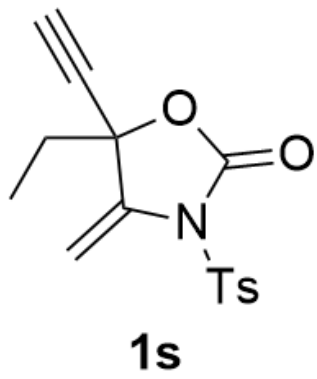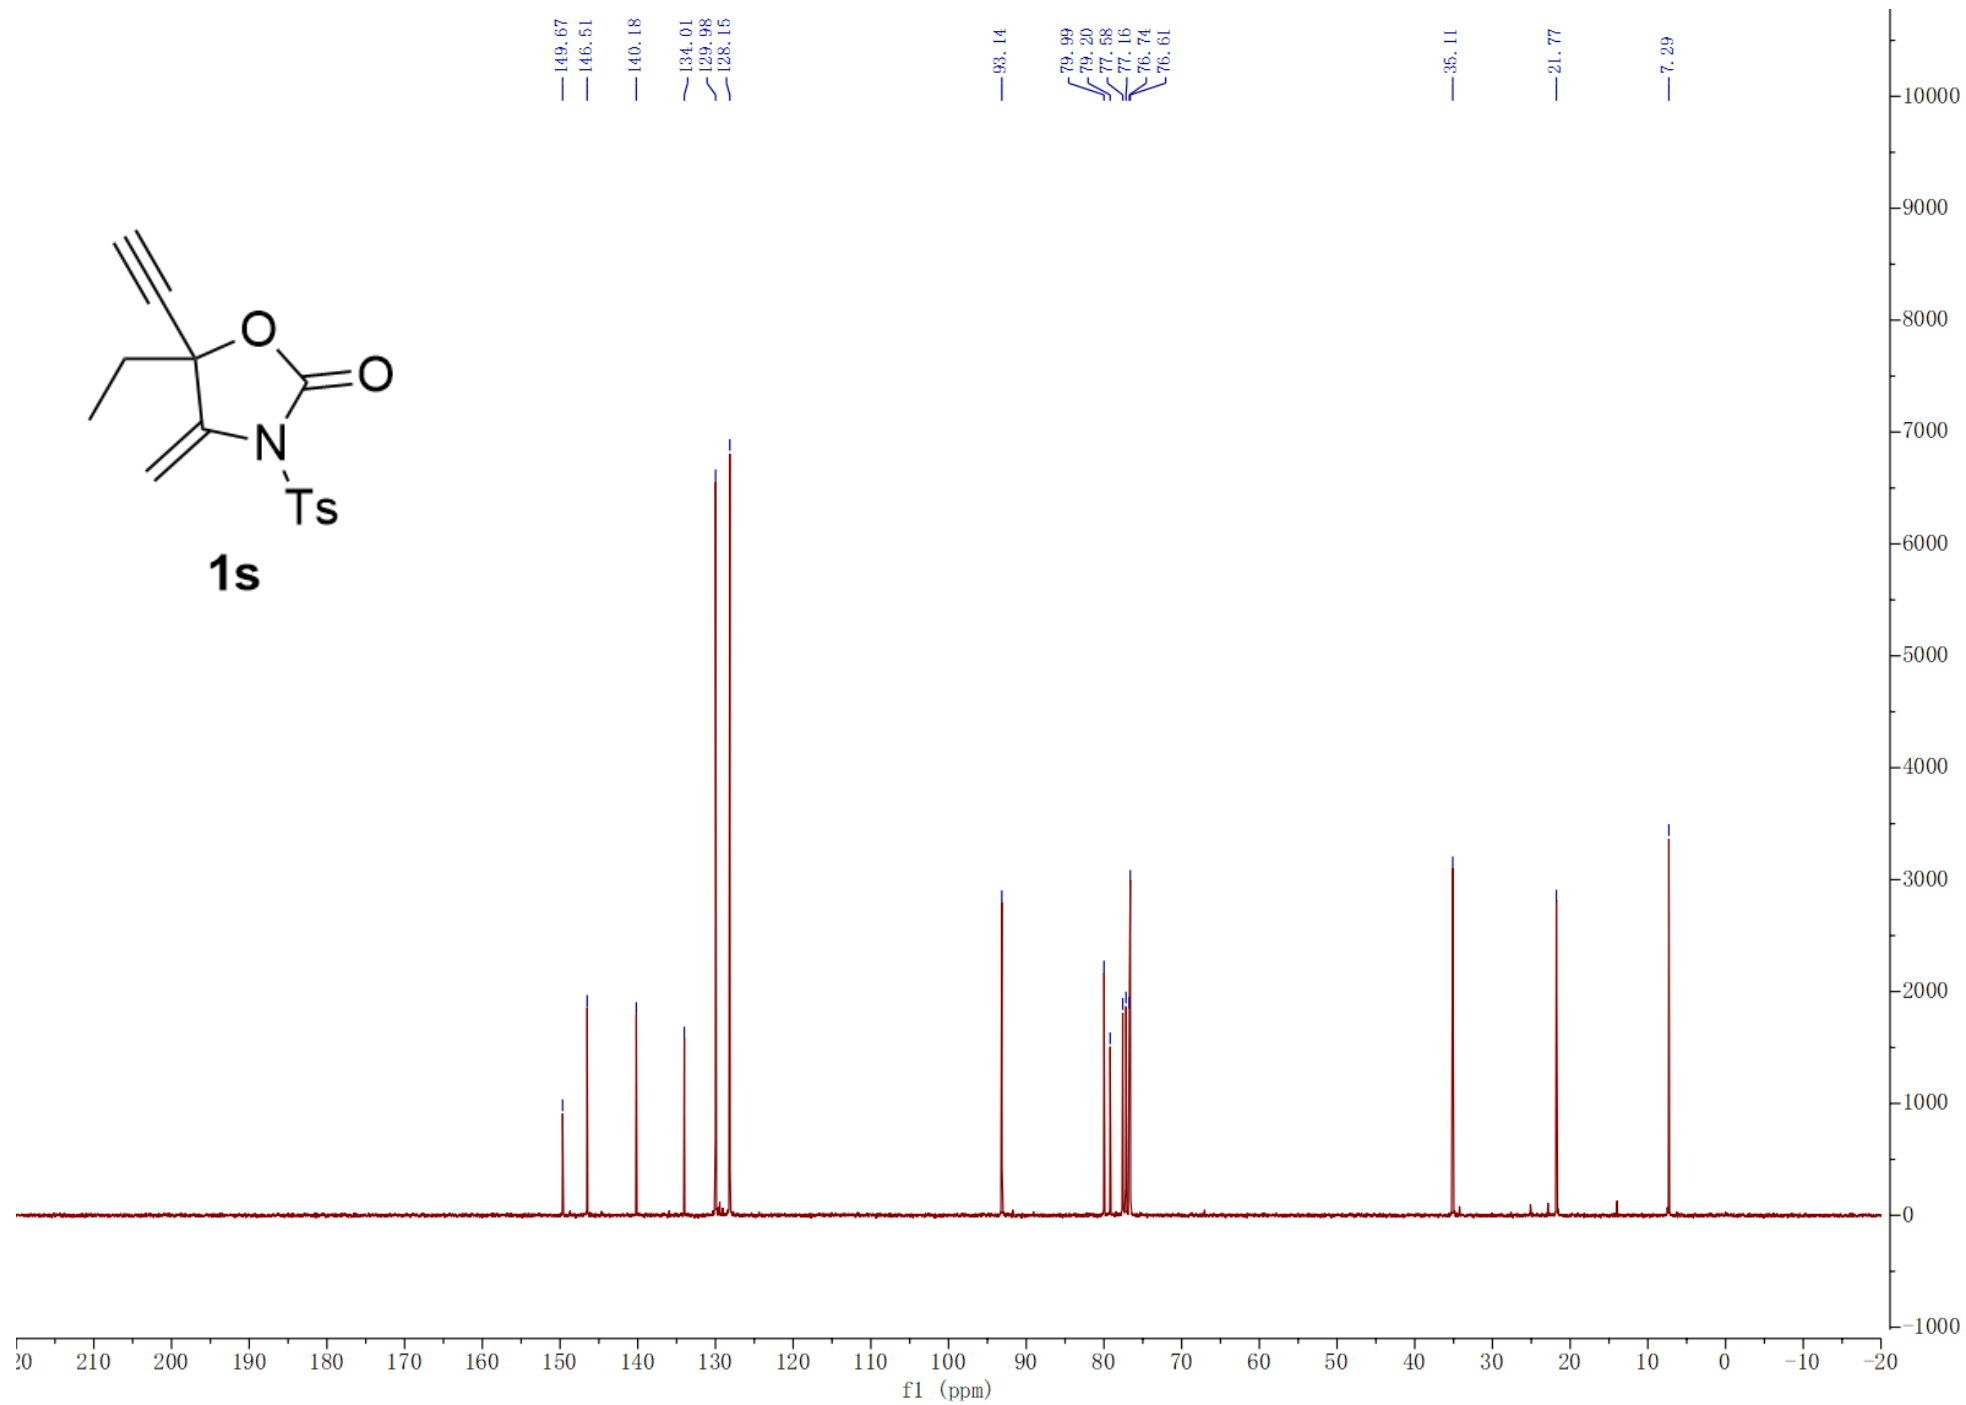

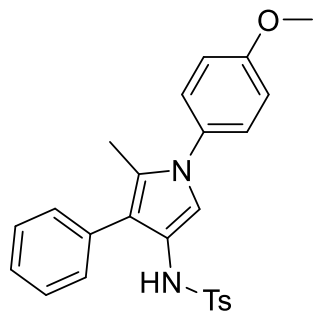

3aa

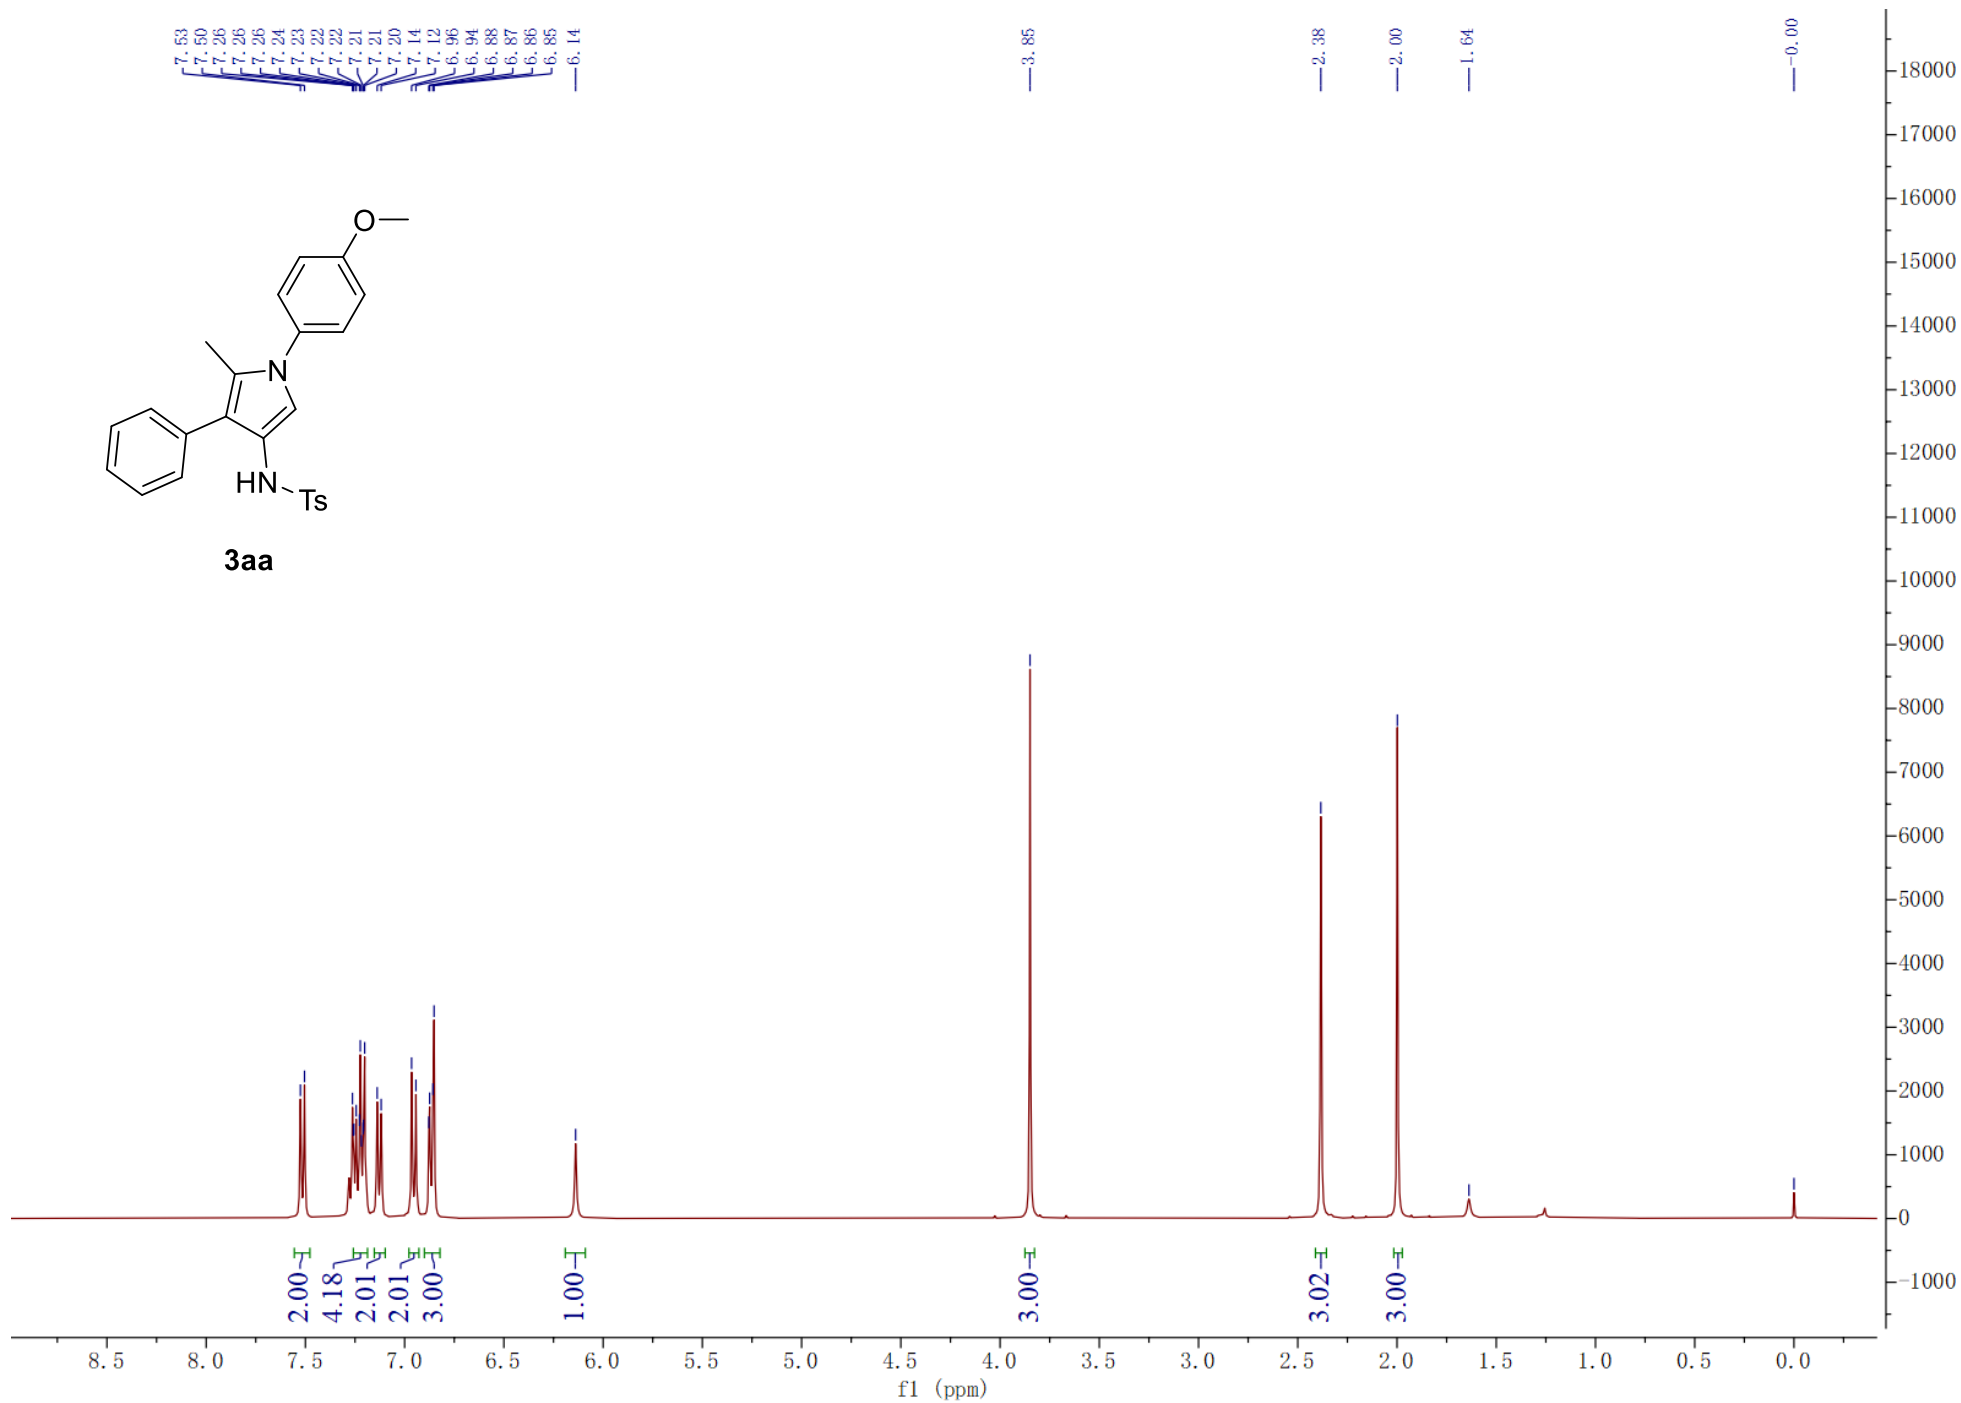

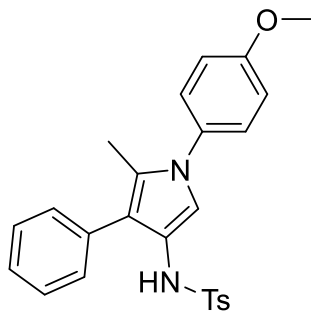

3aa

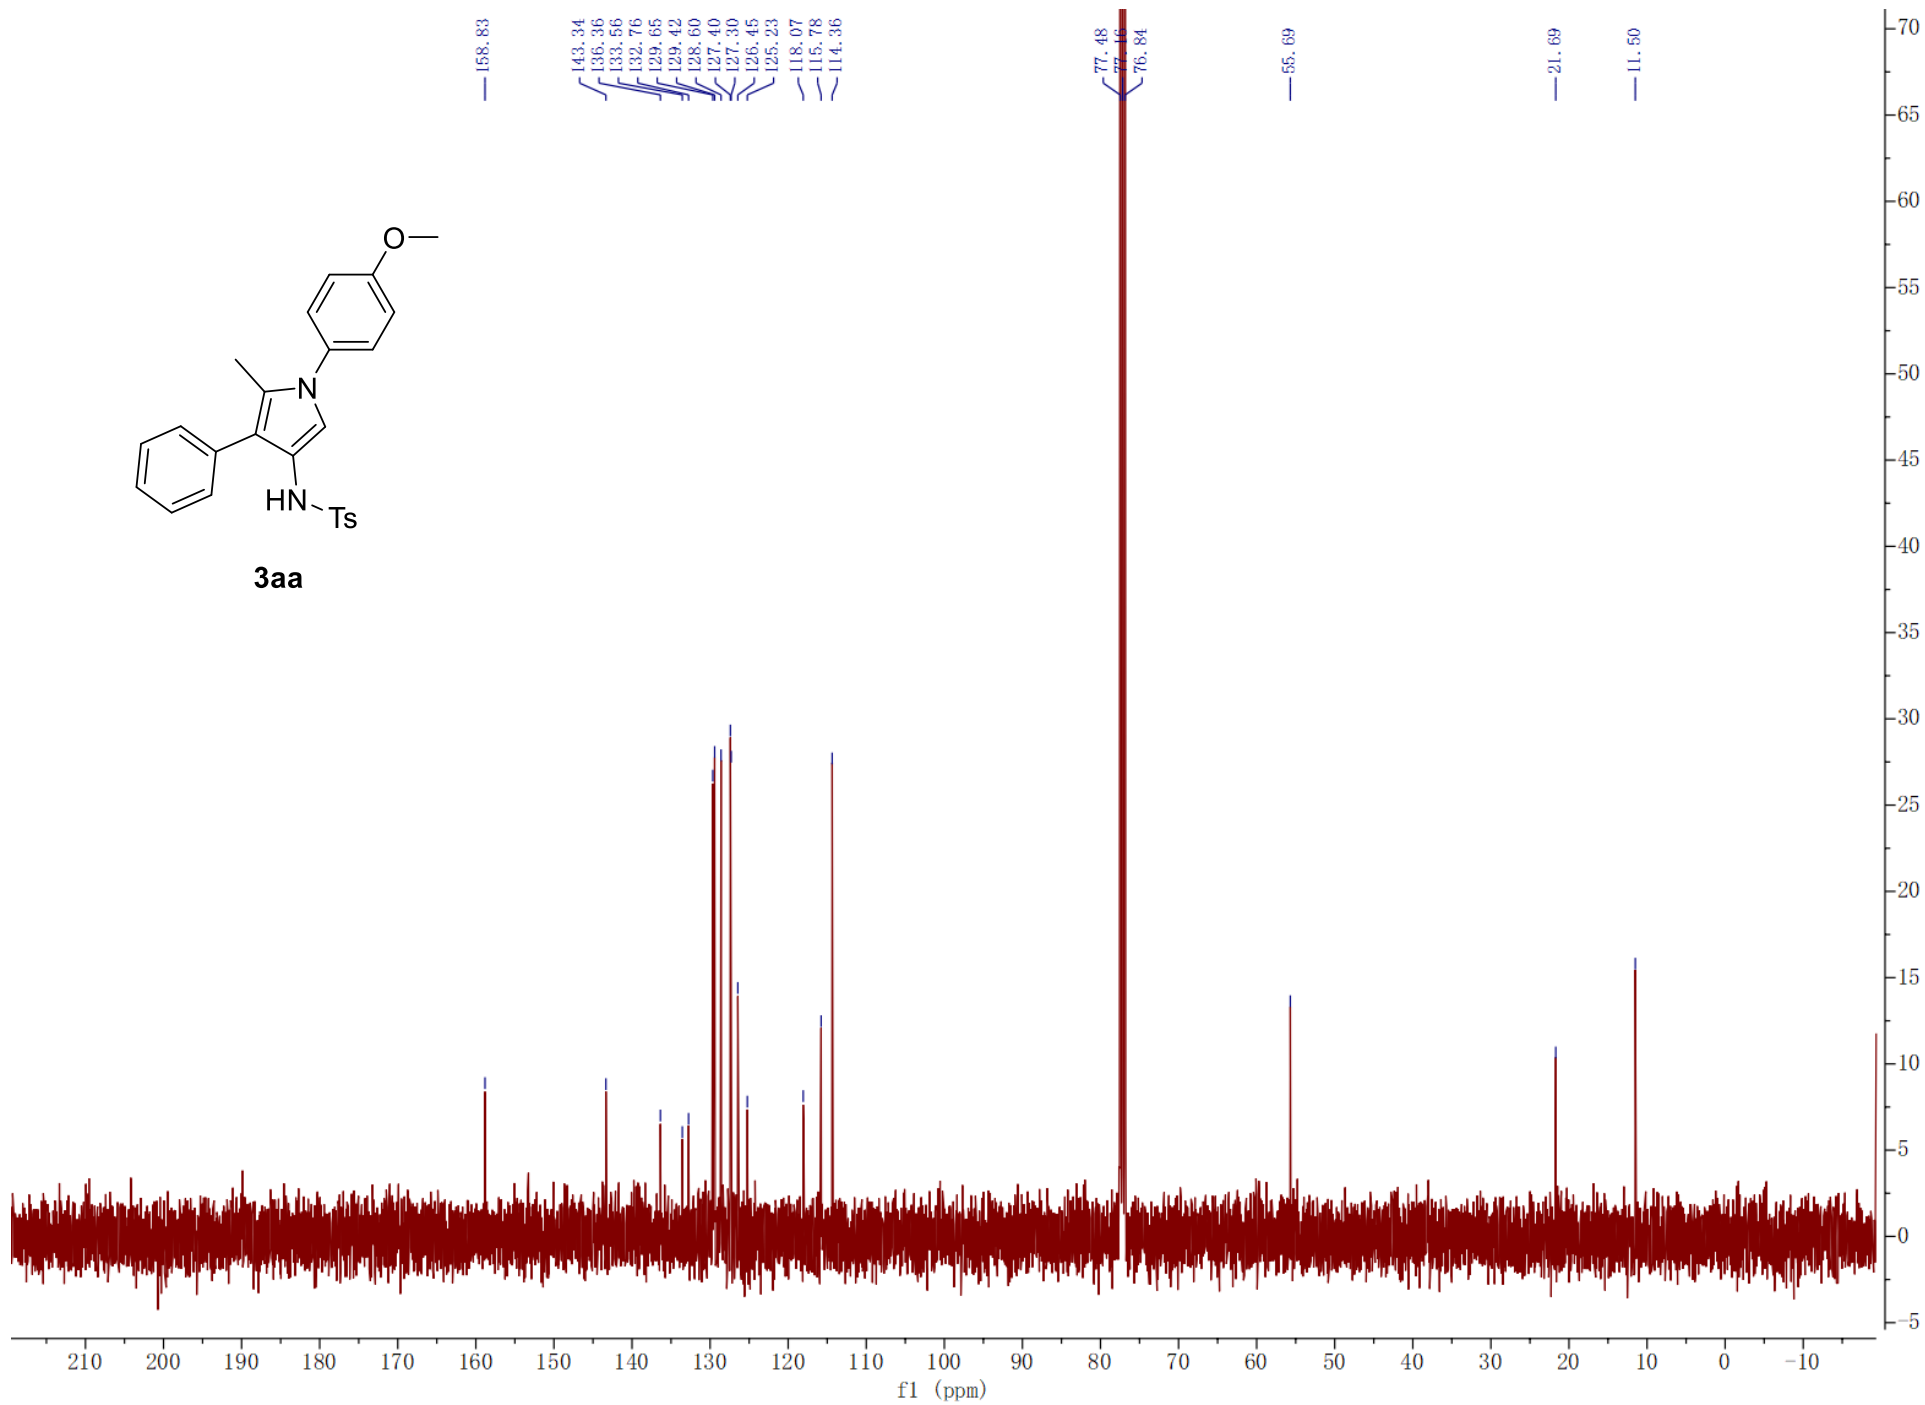

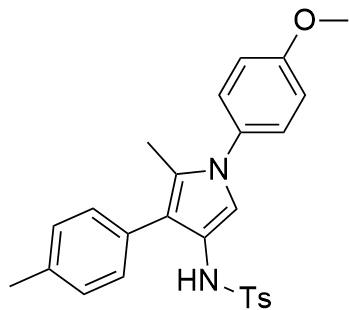

**3ba**

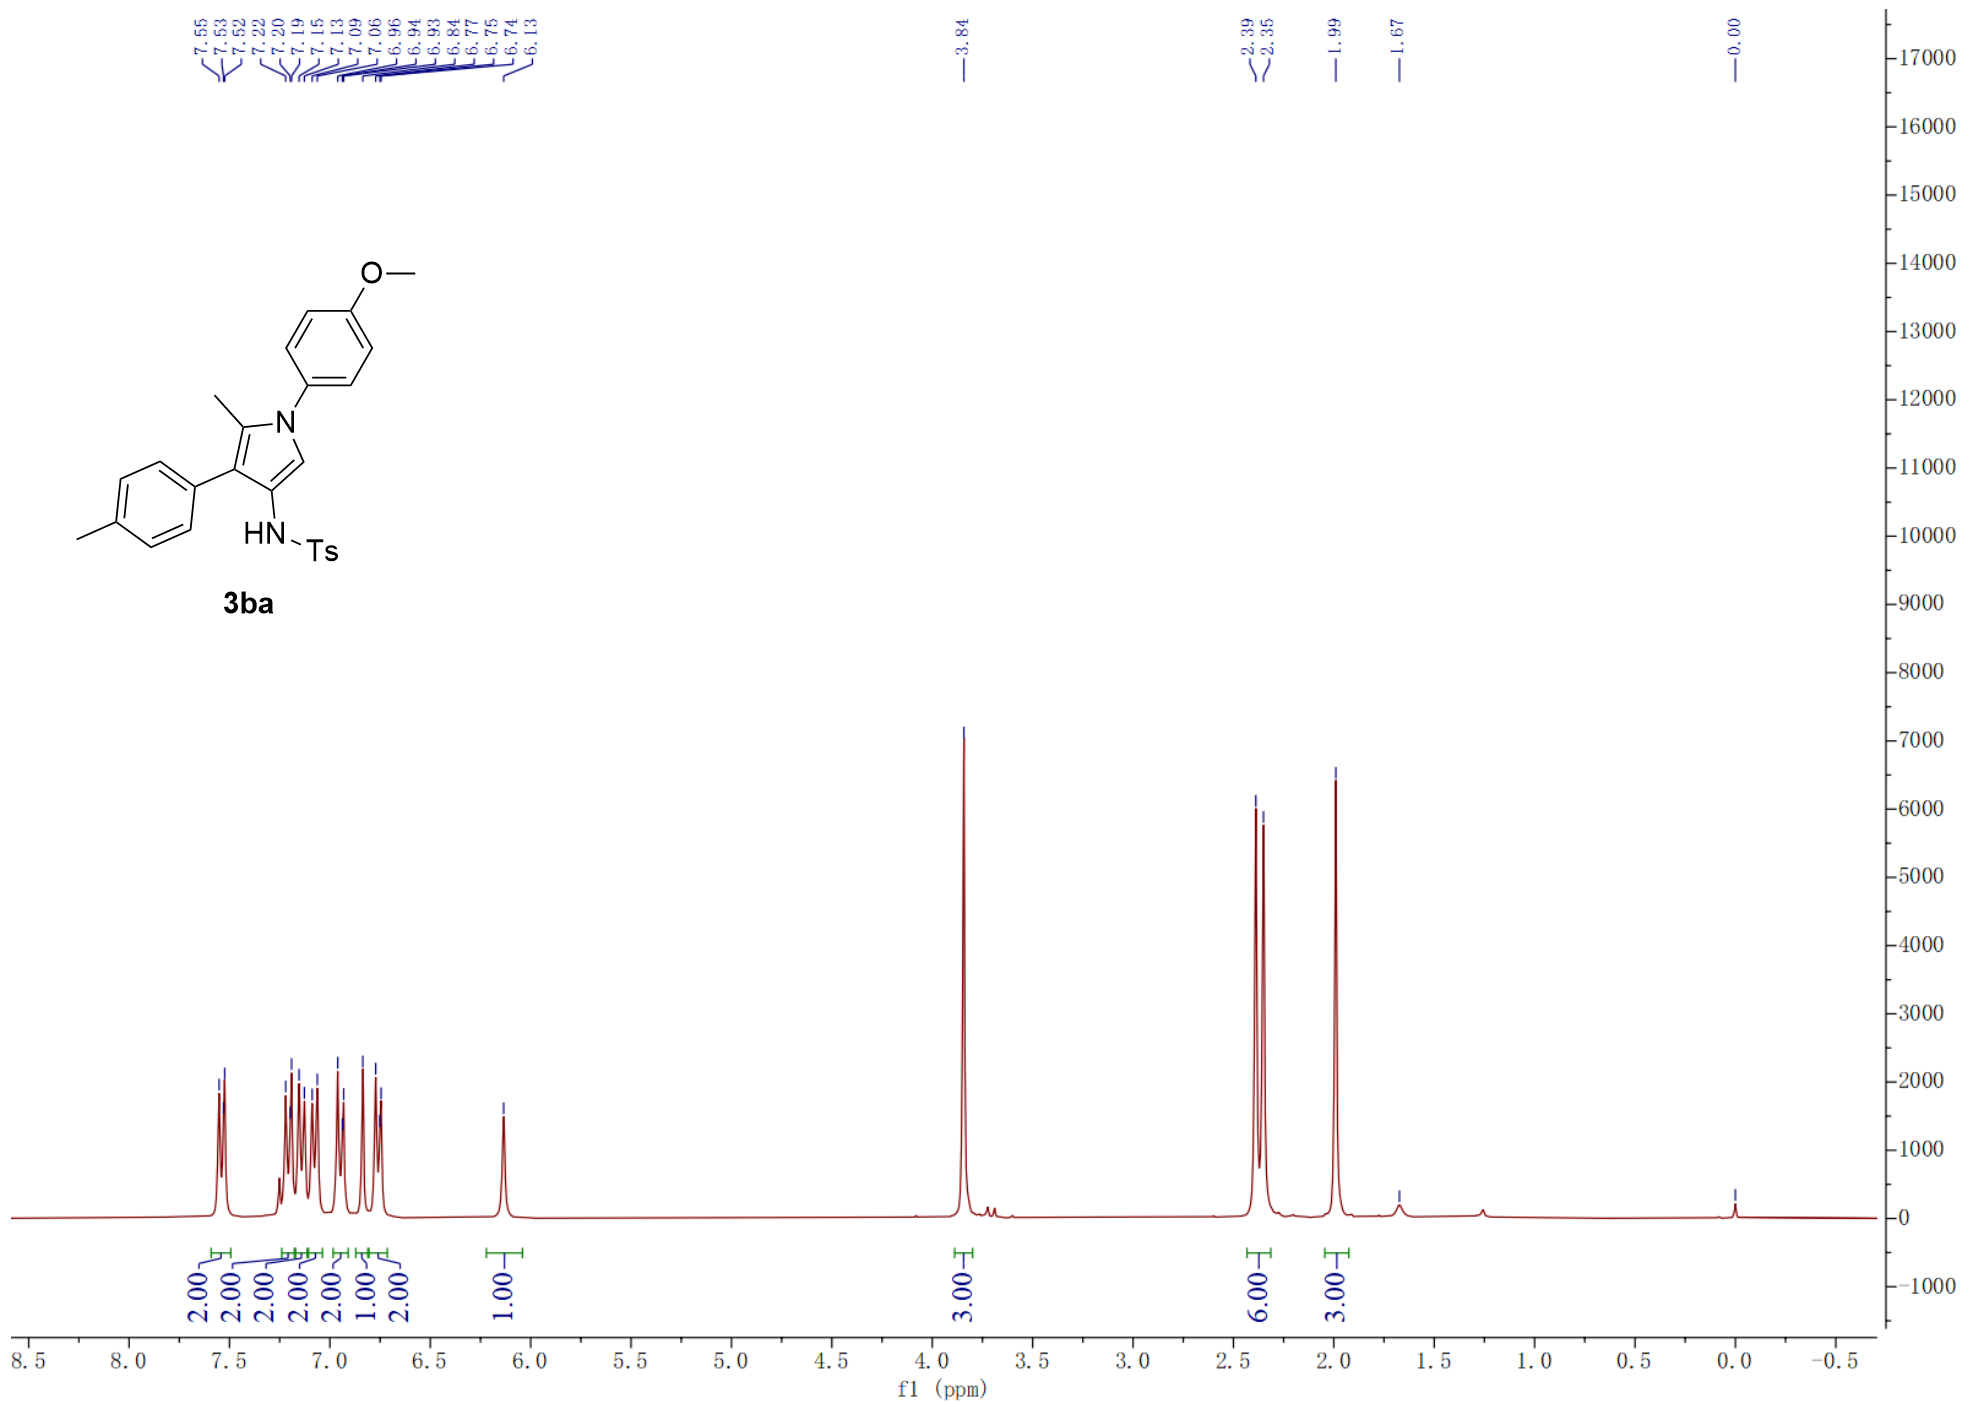

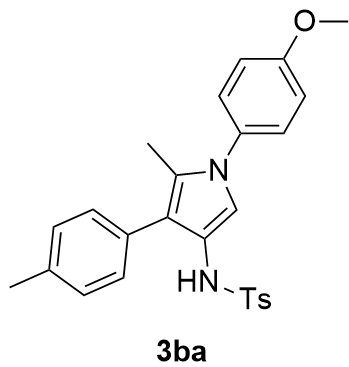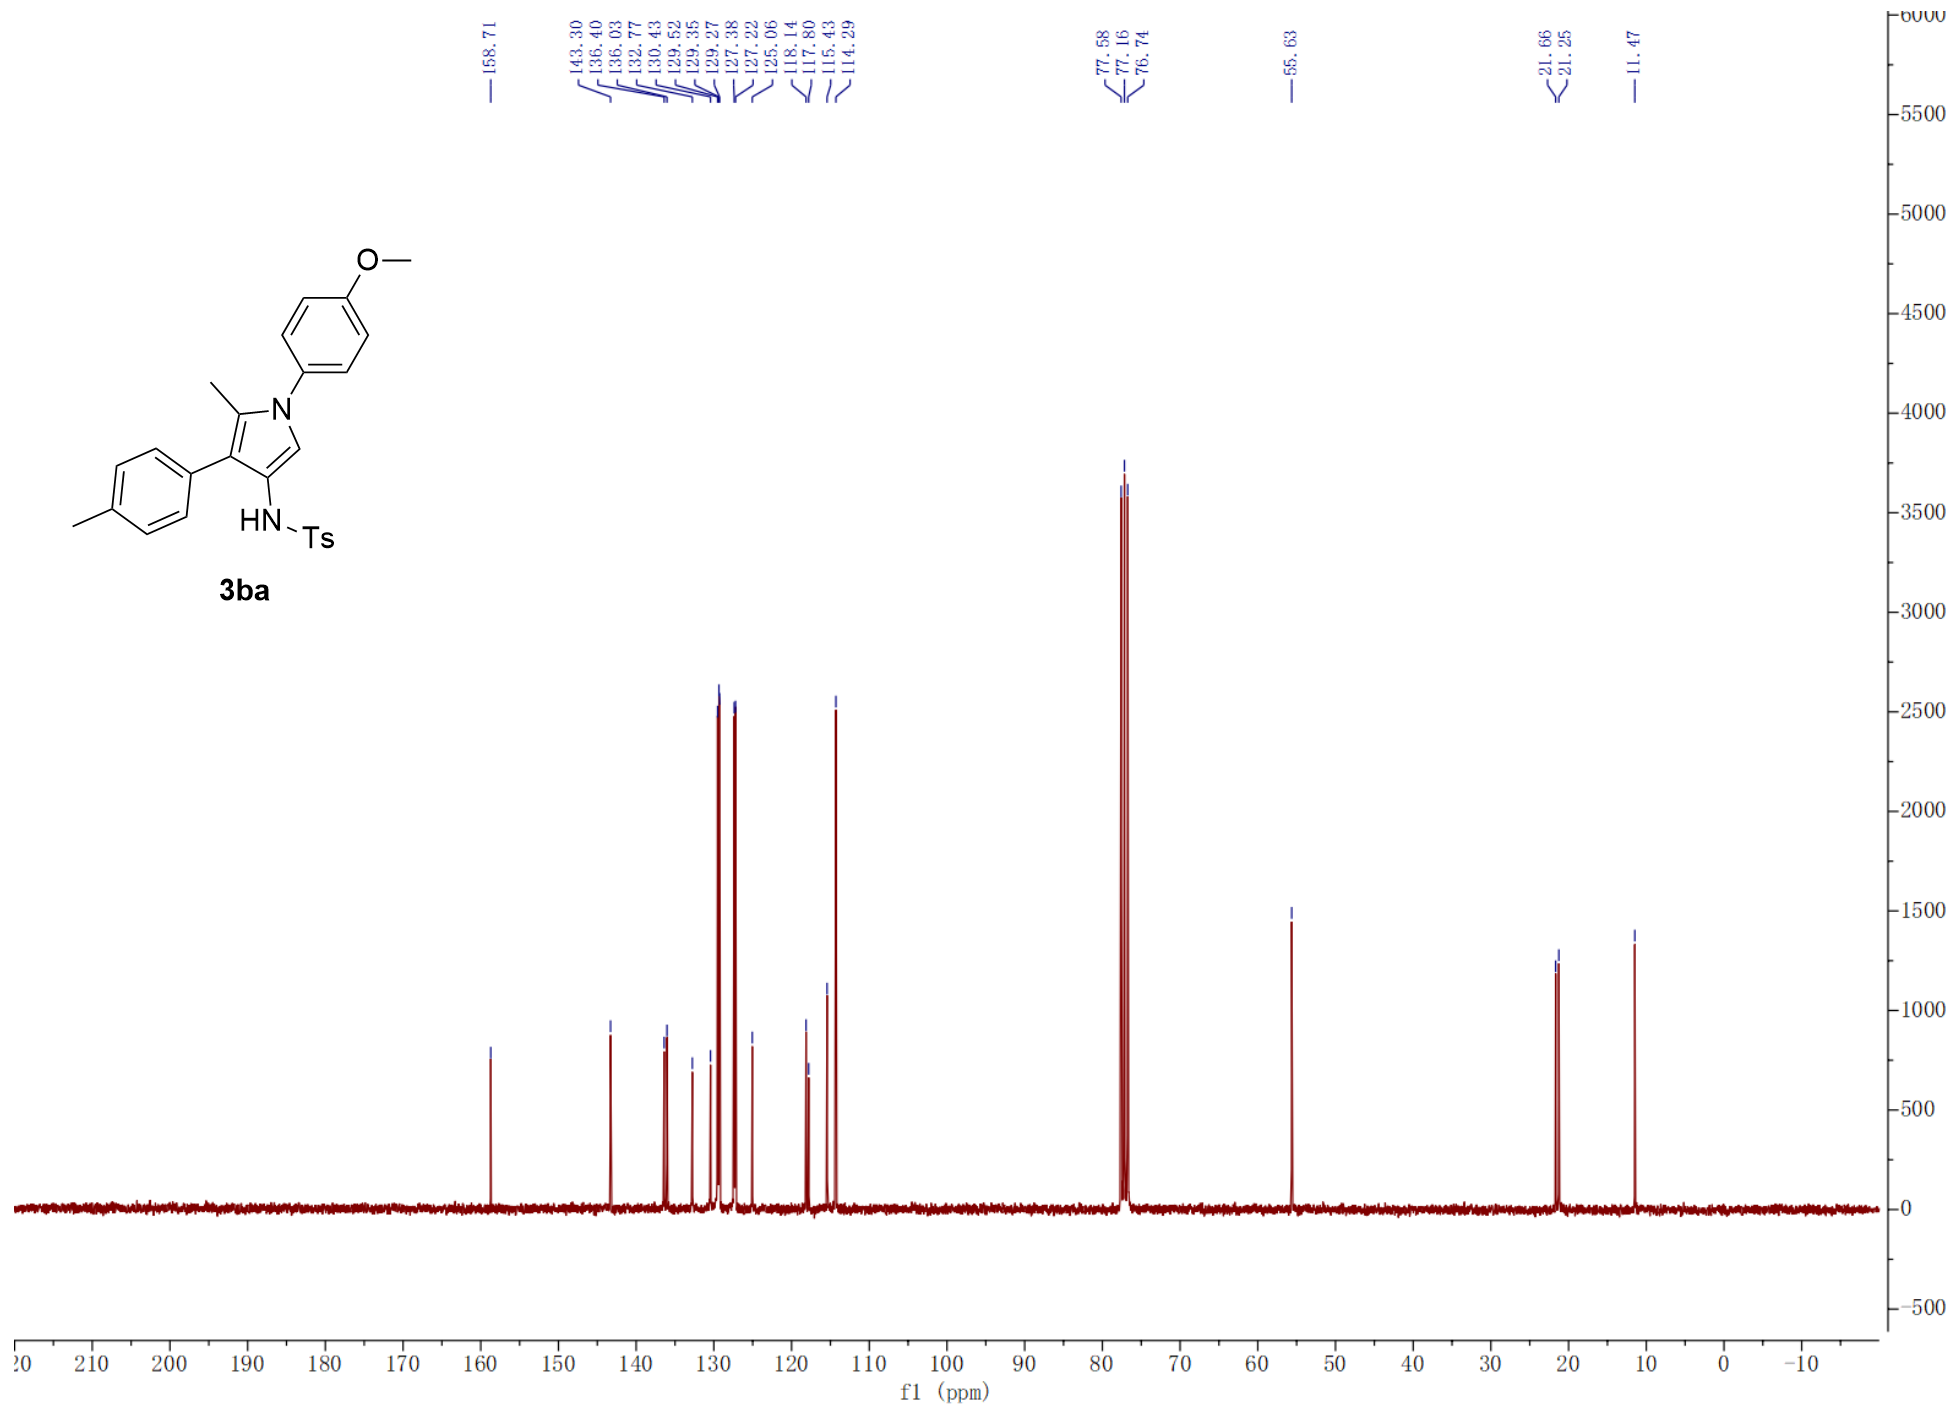

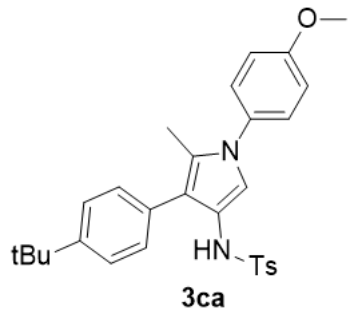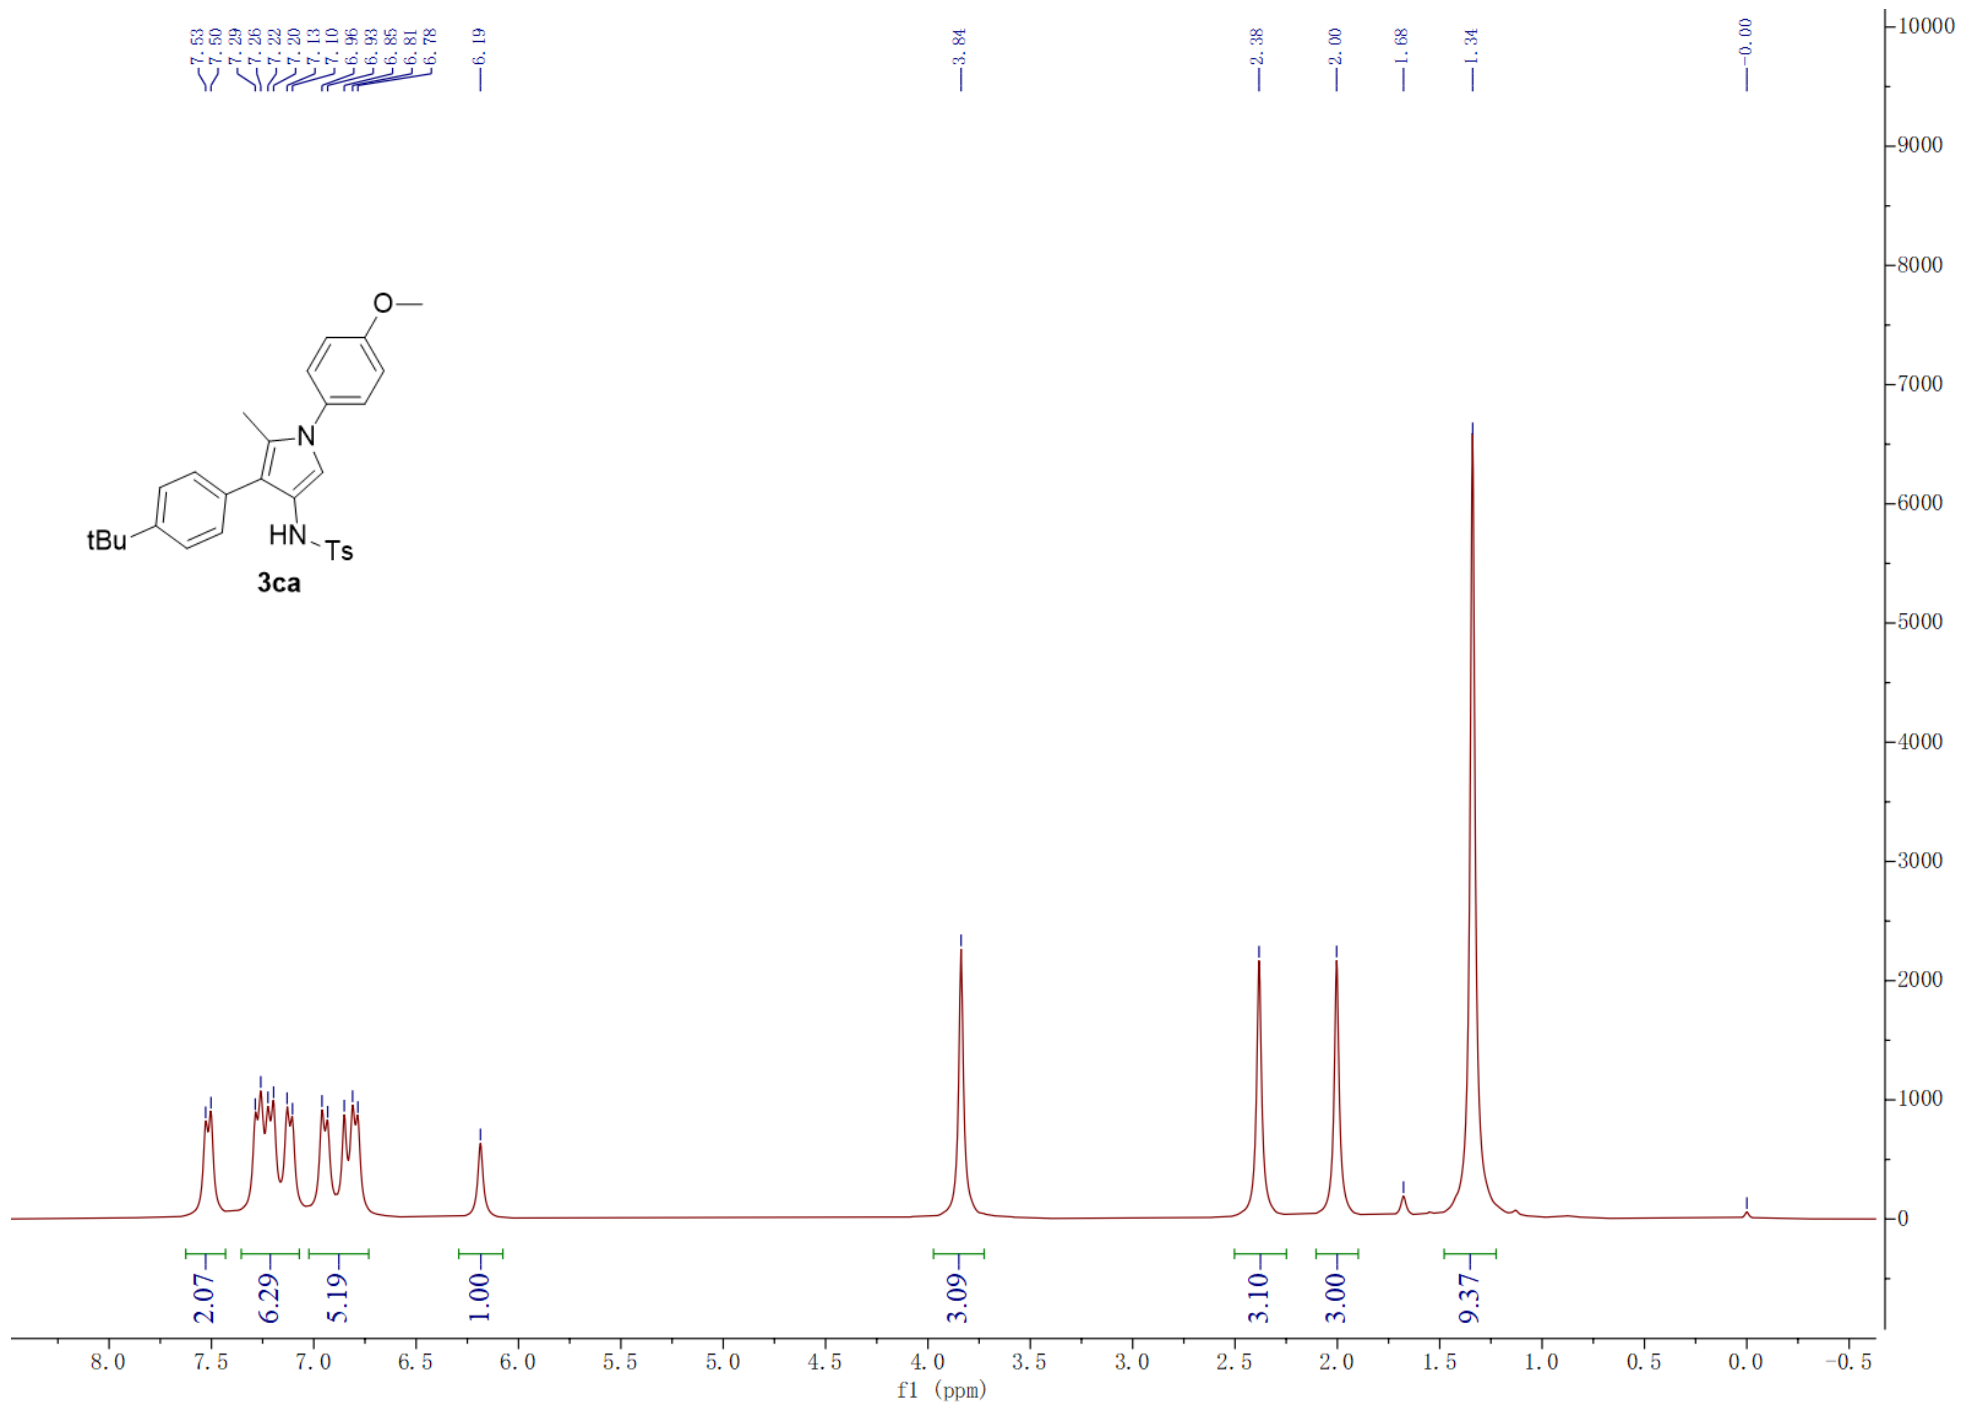



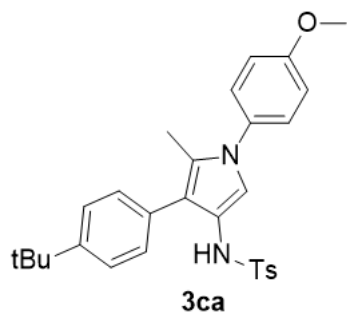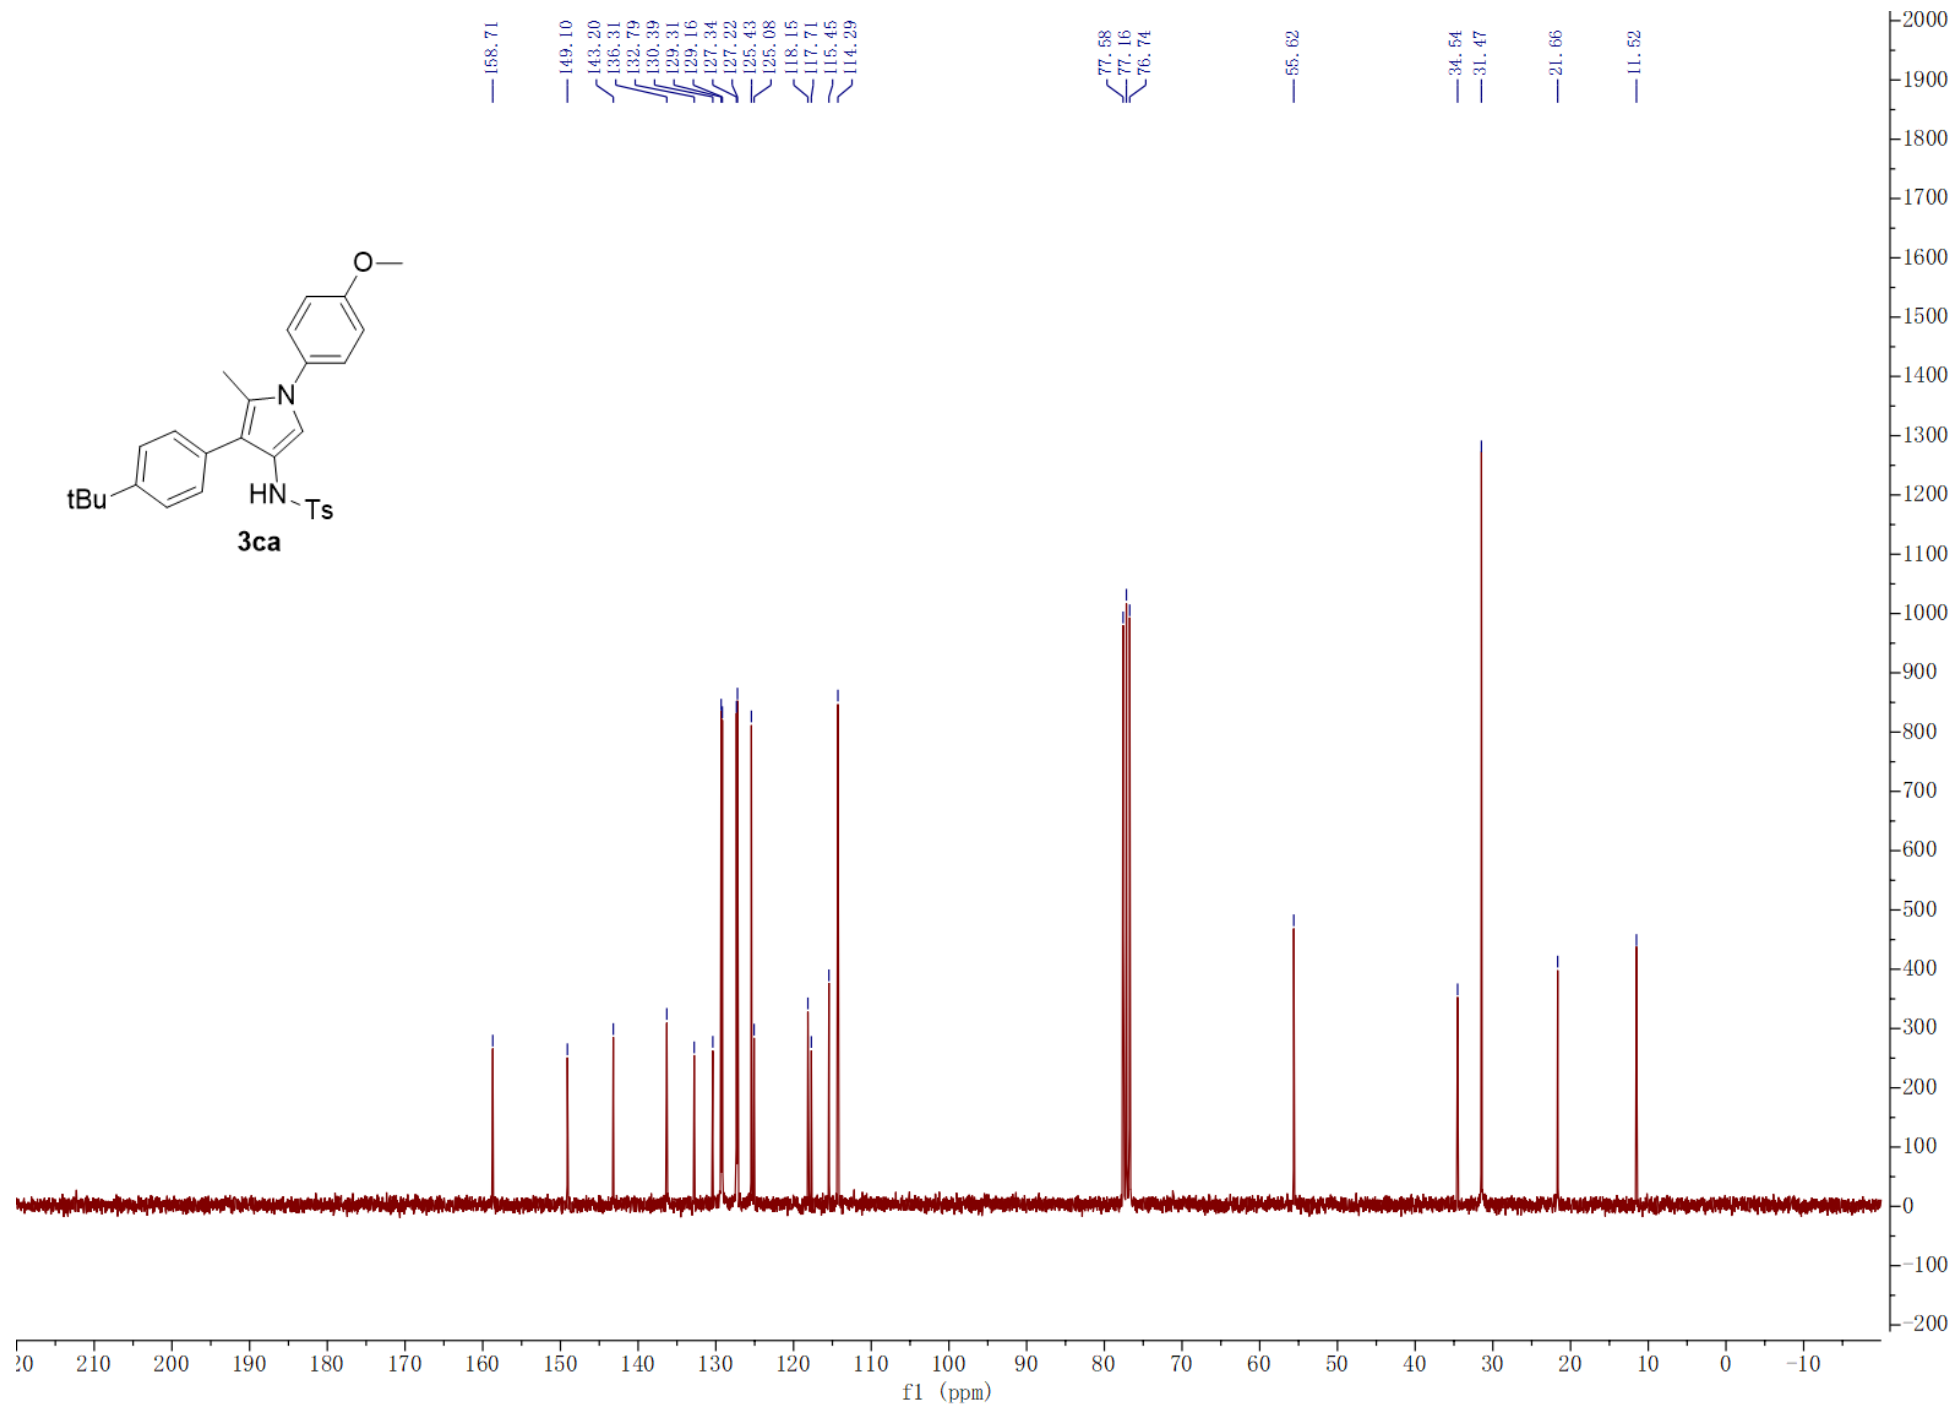

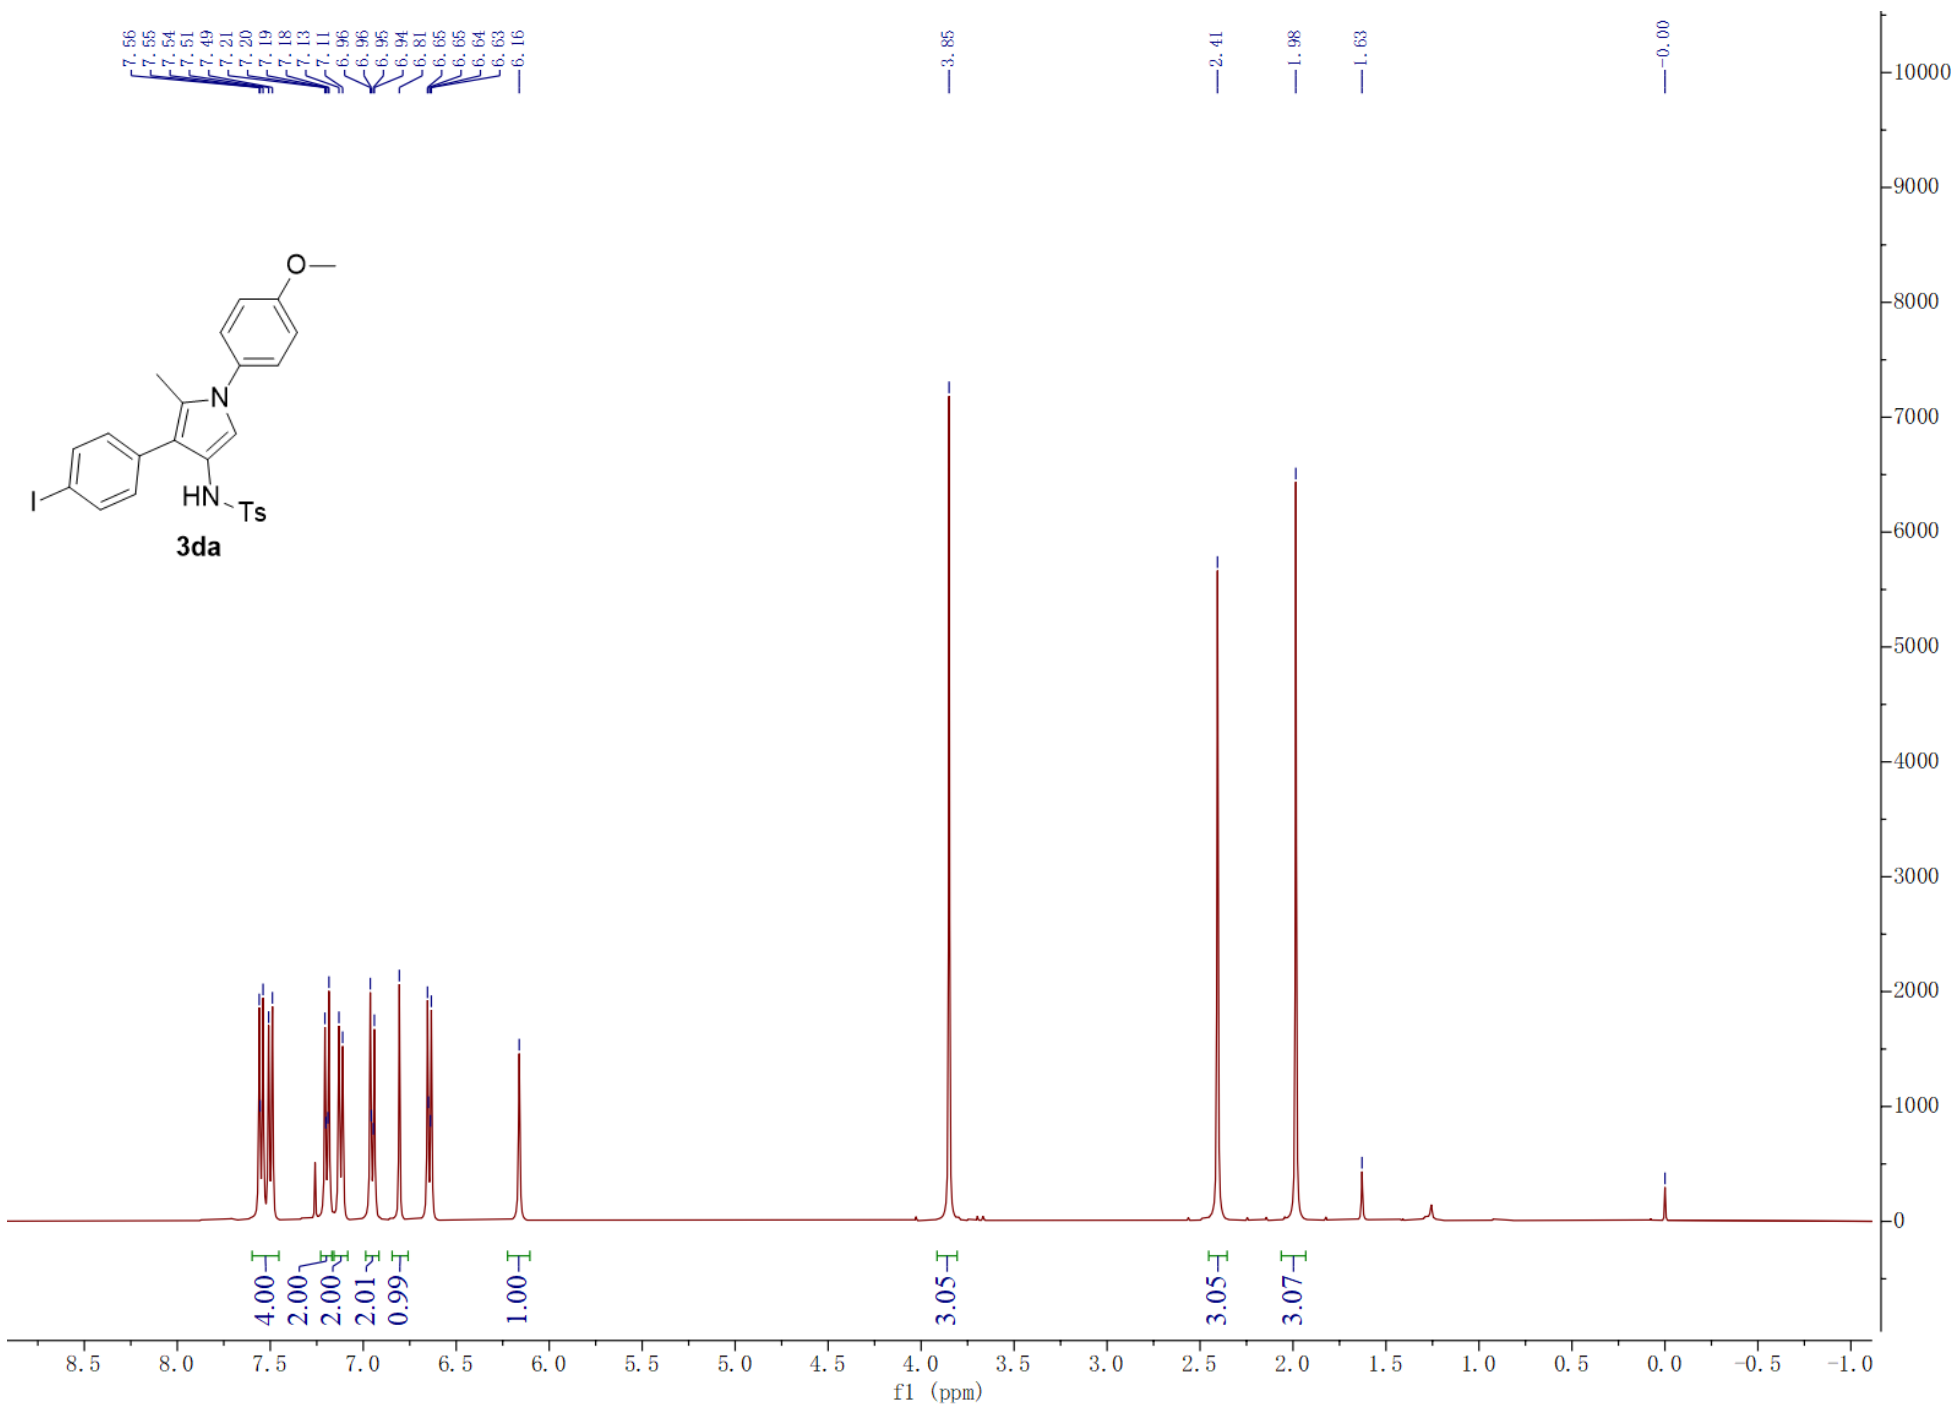

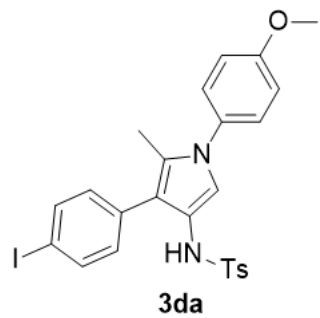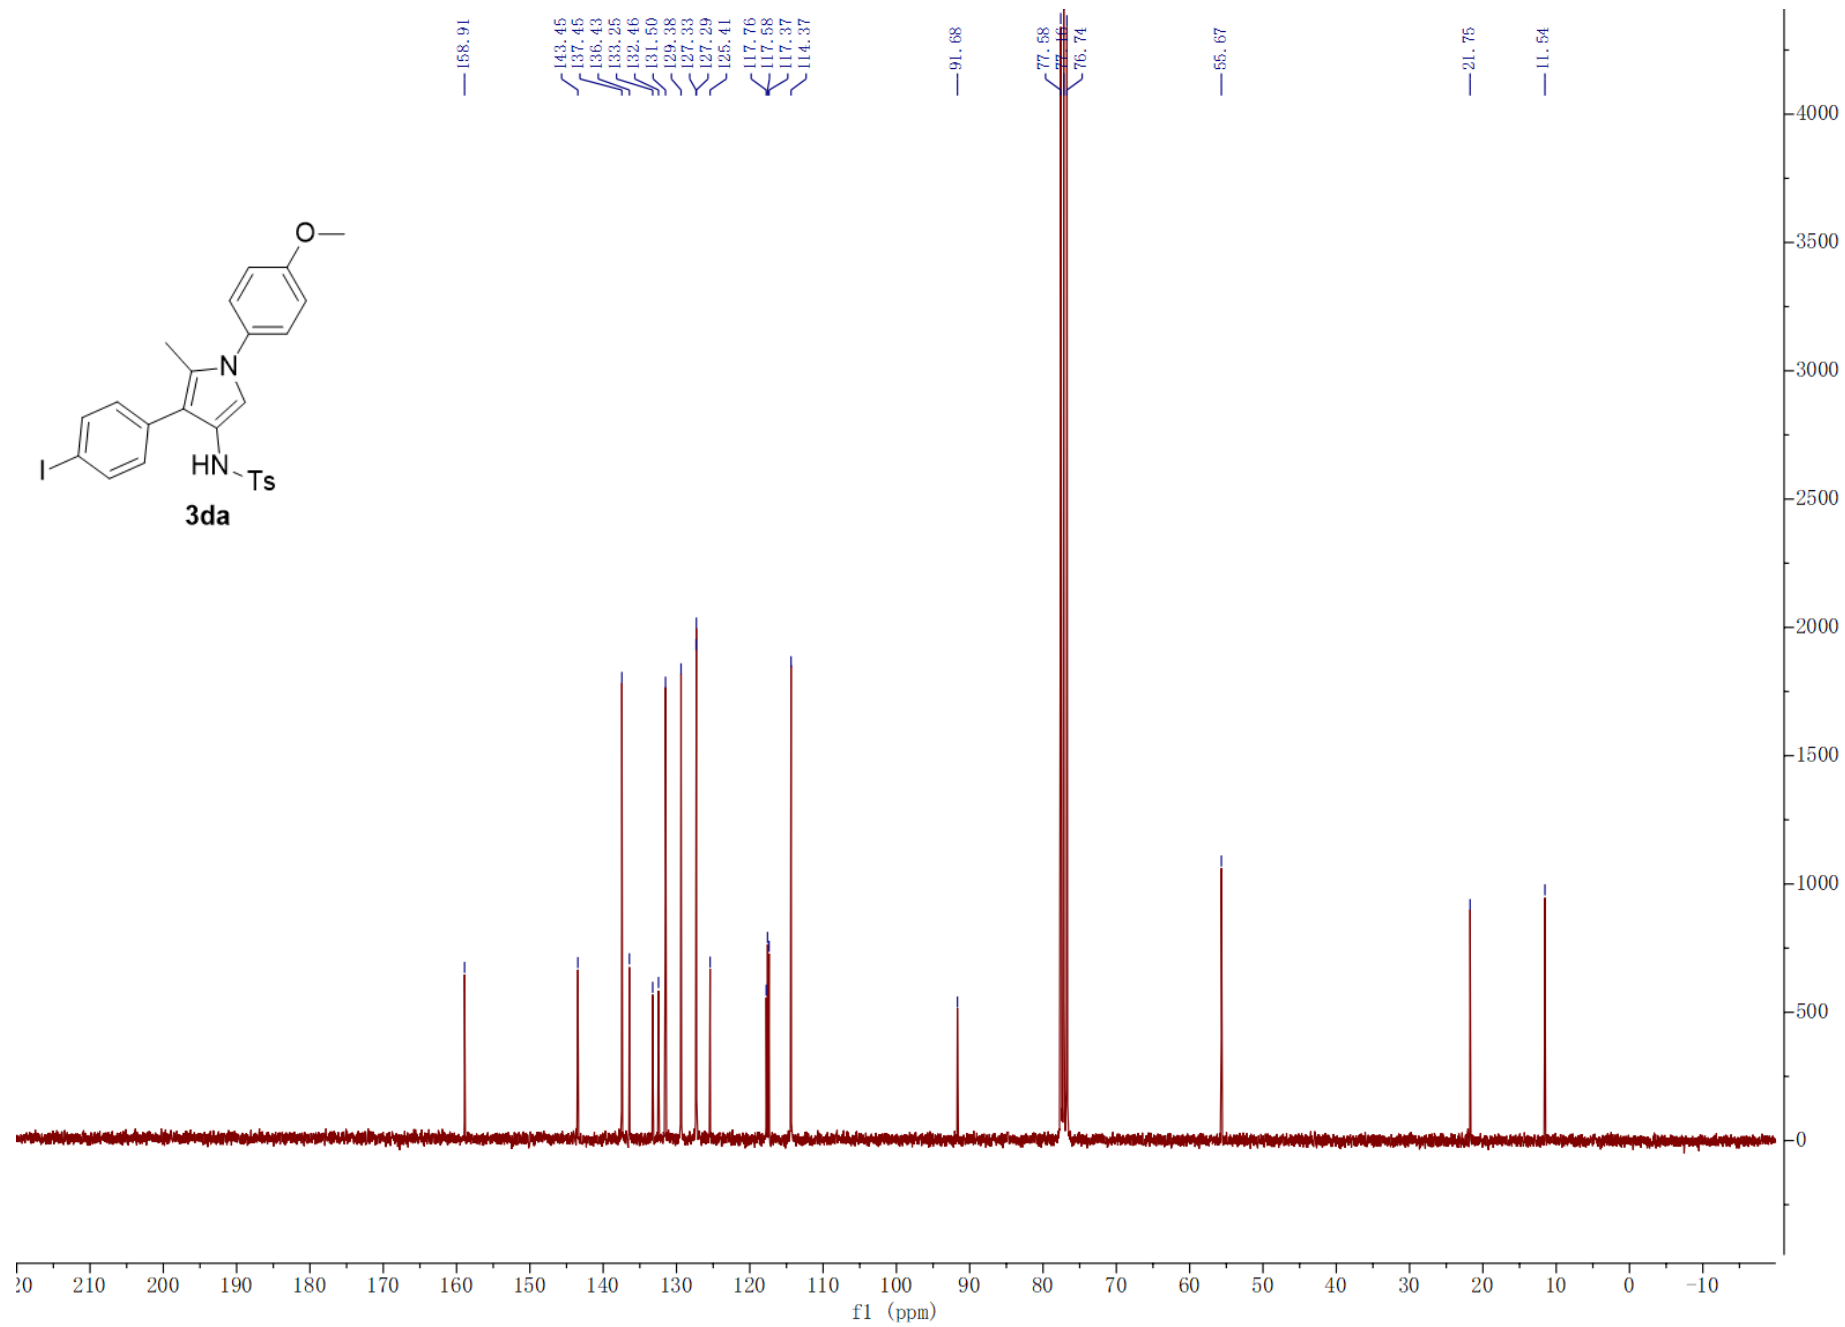

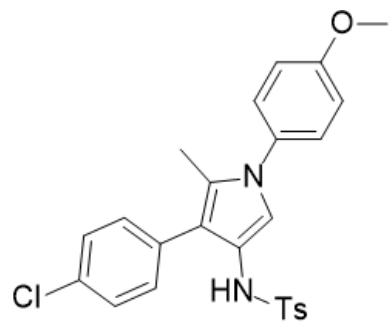

3ea

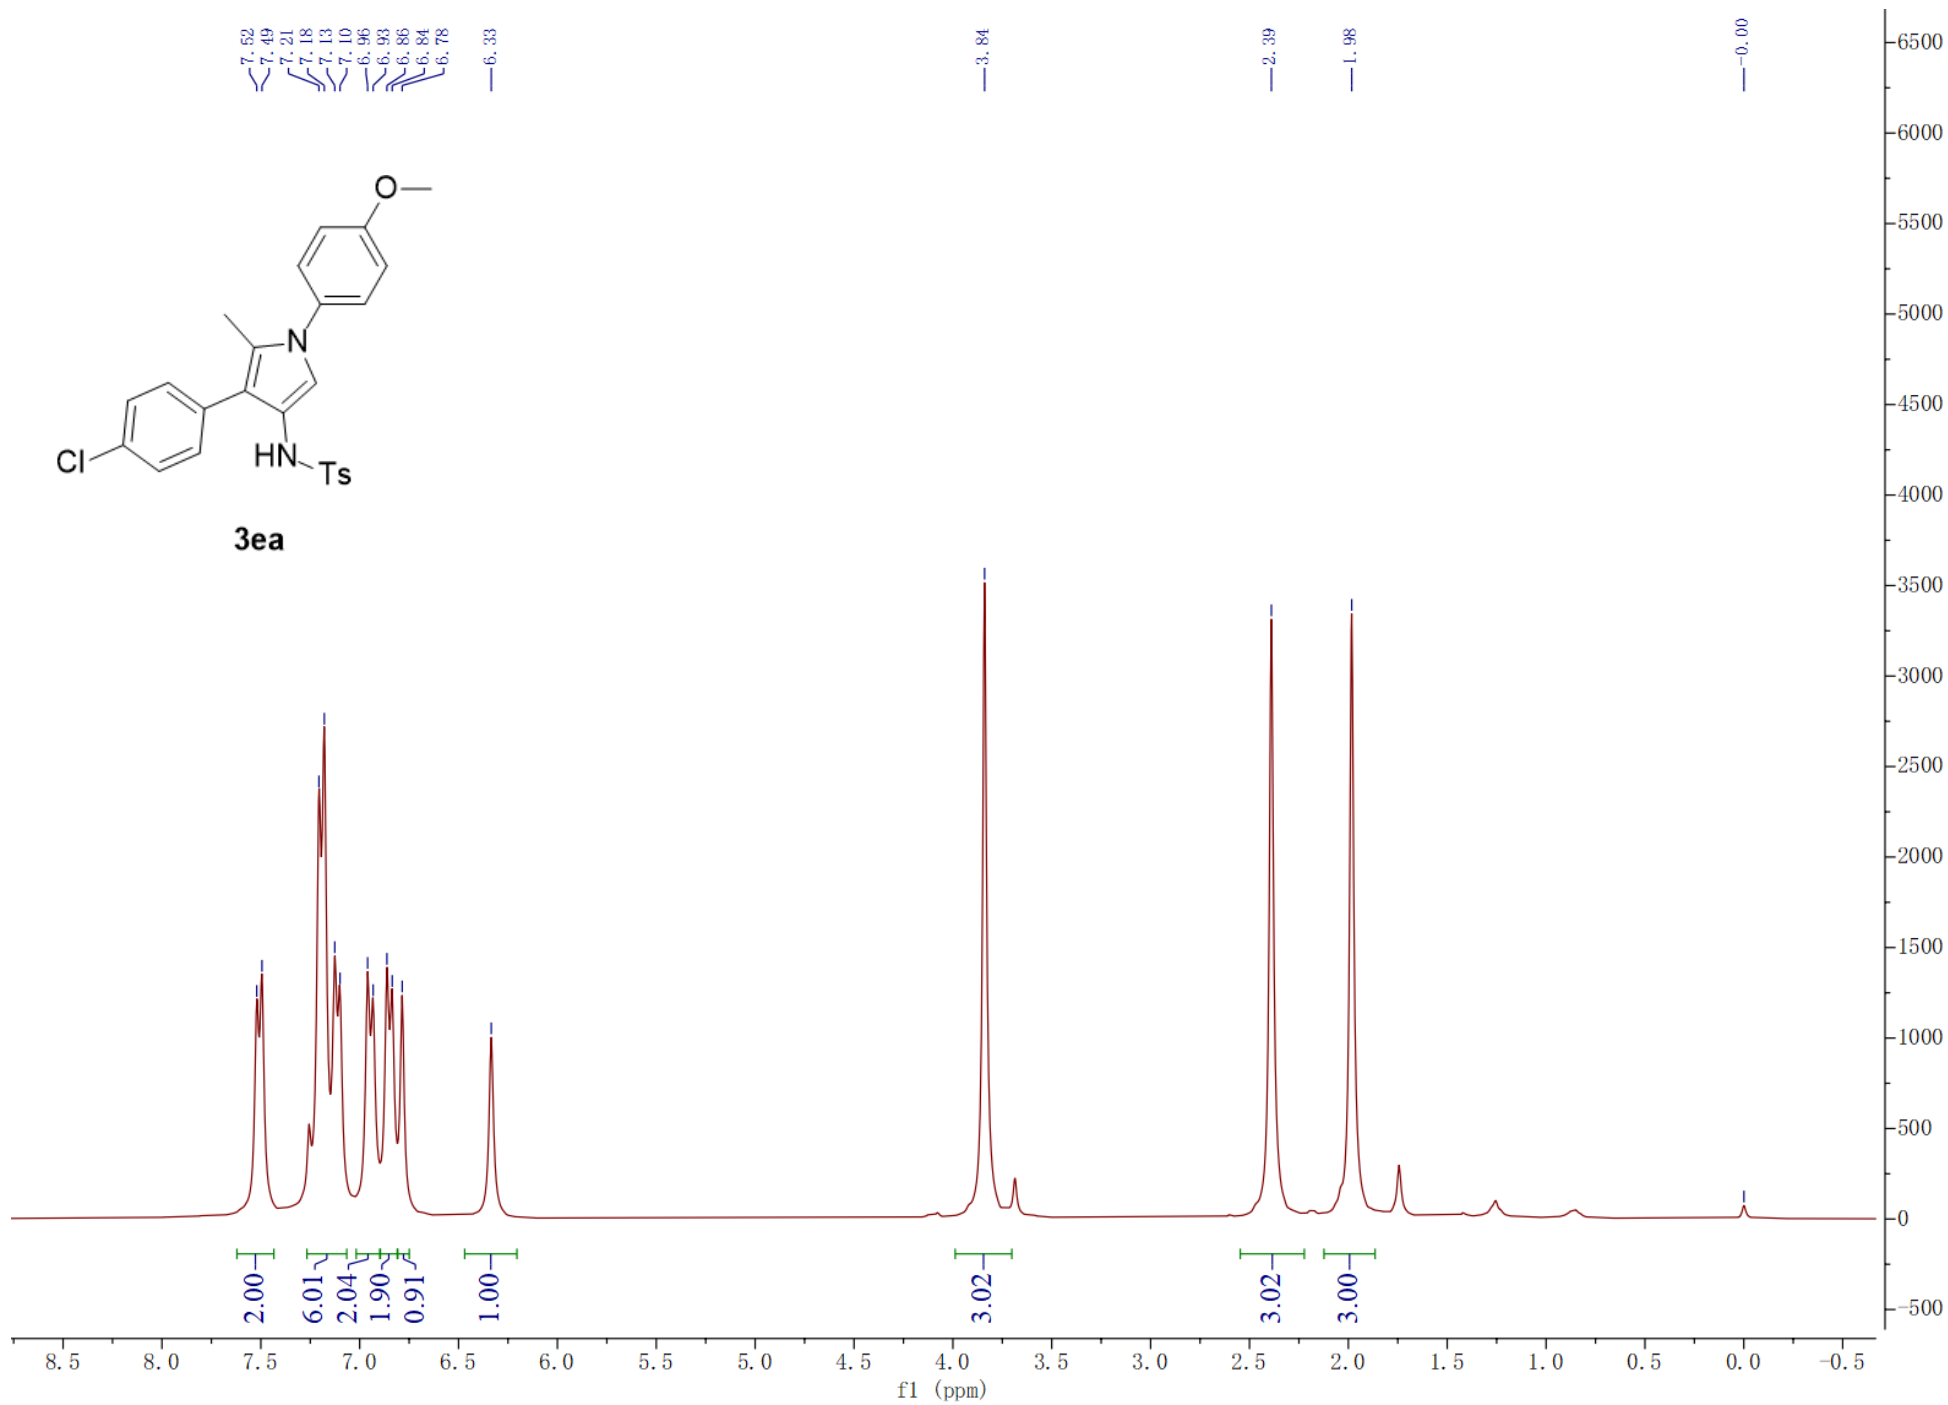

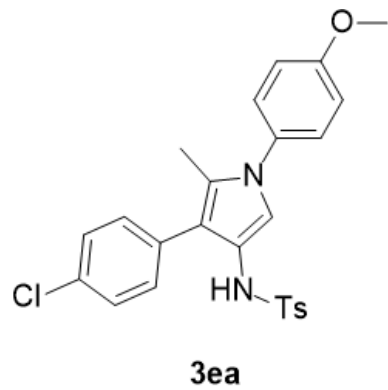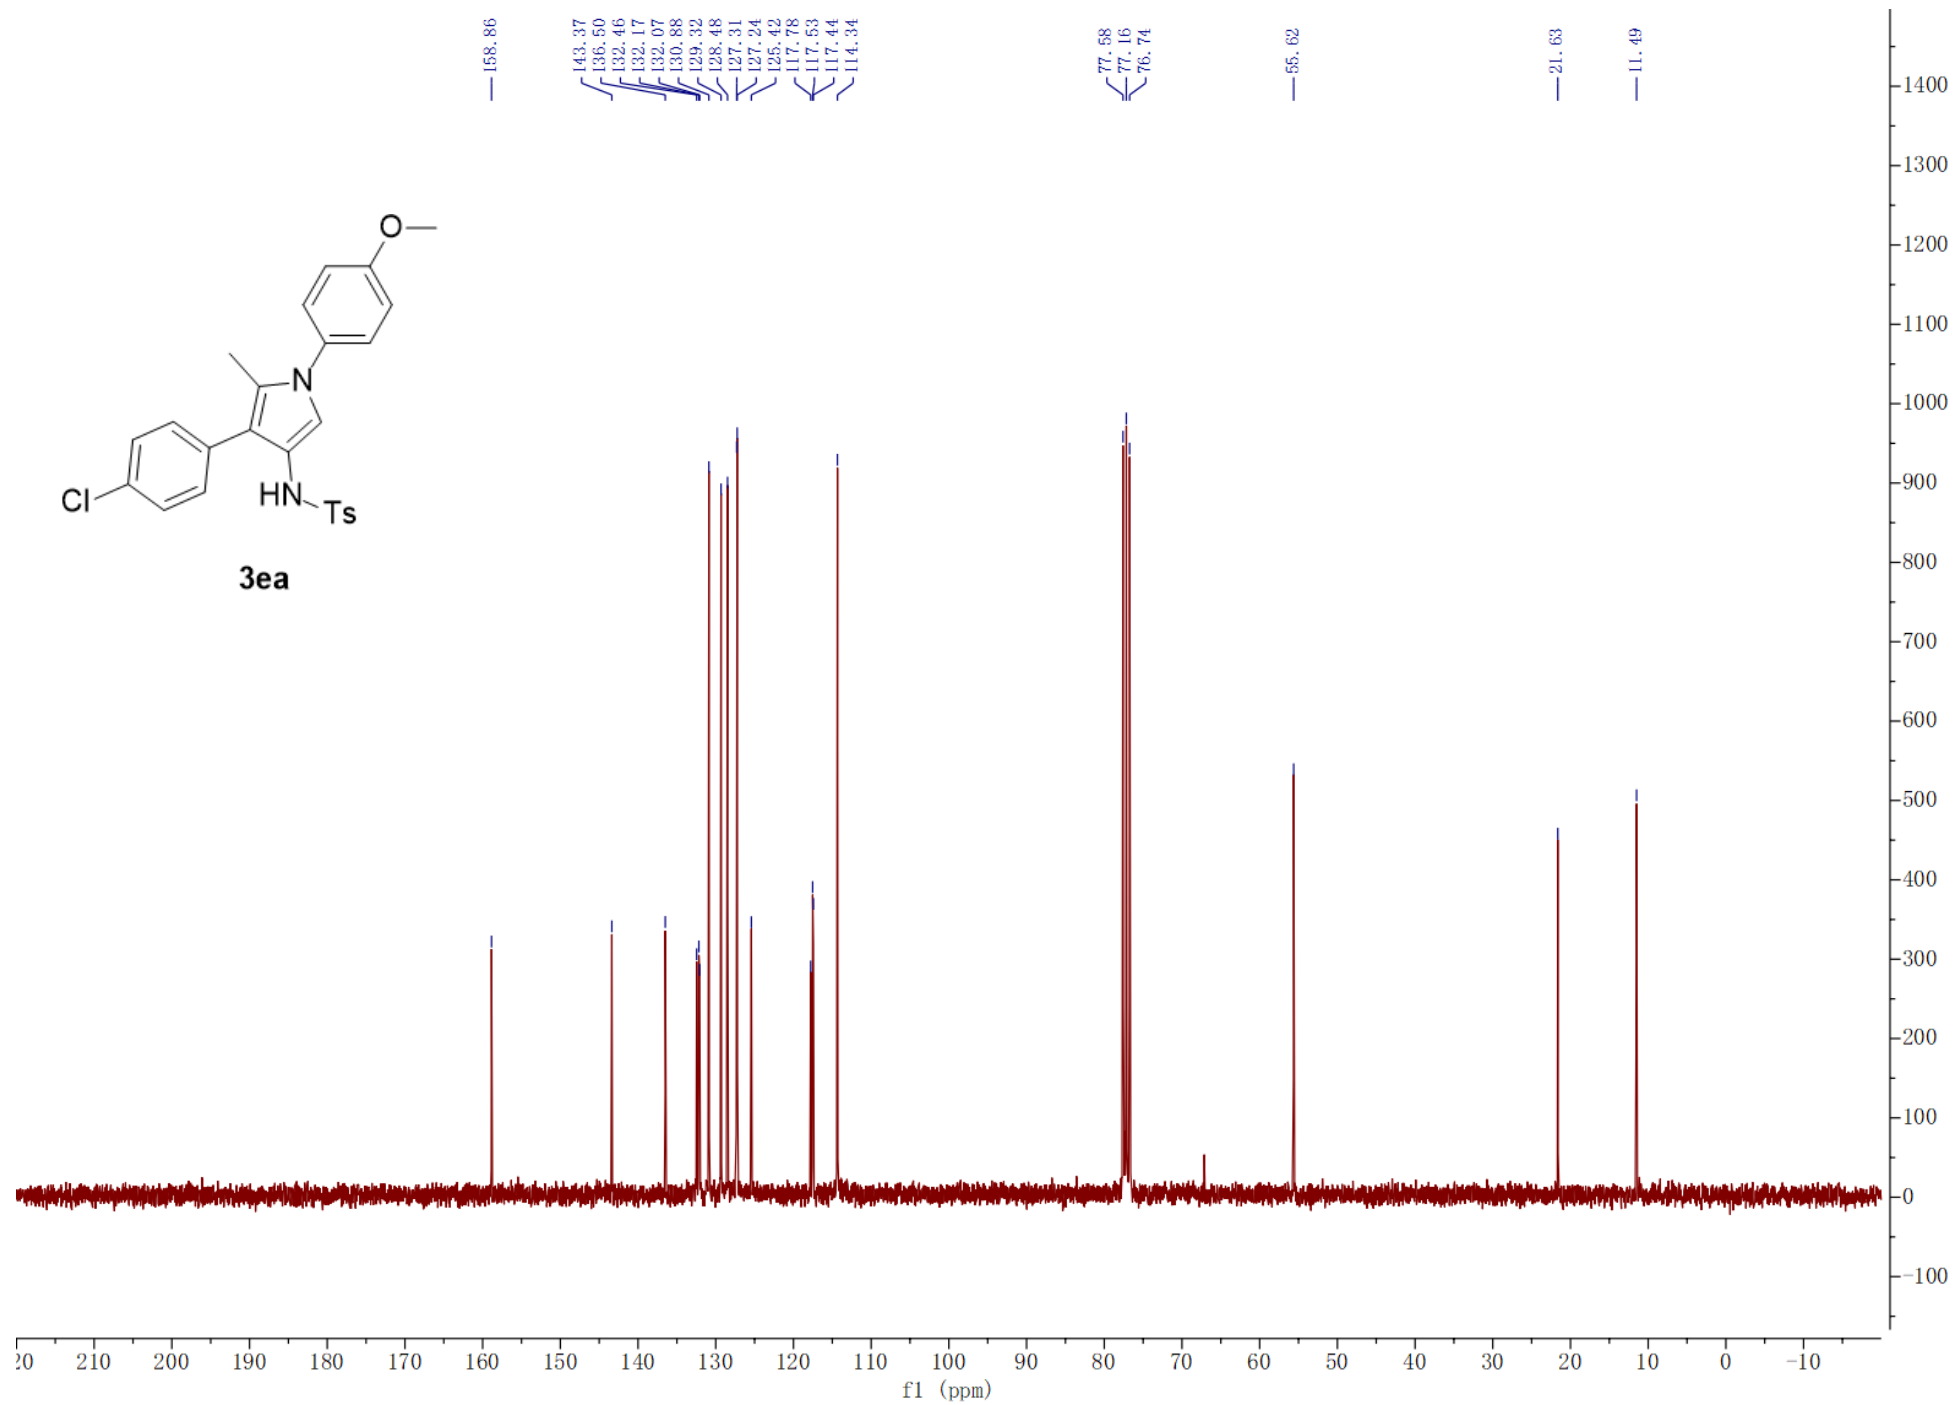

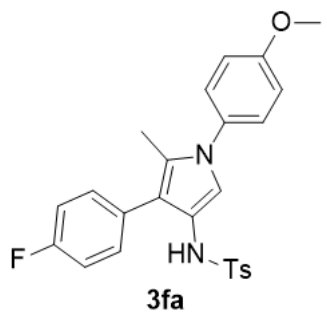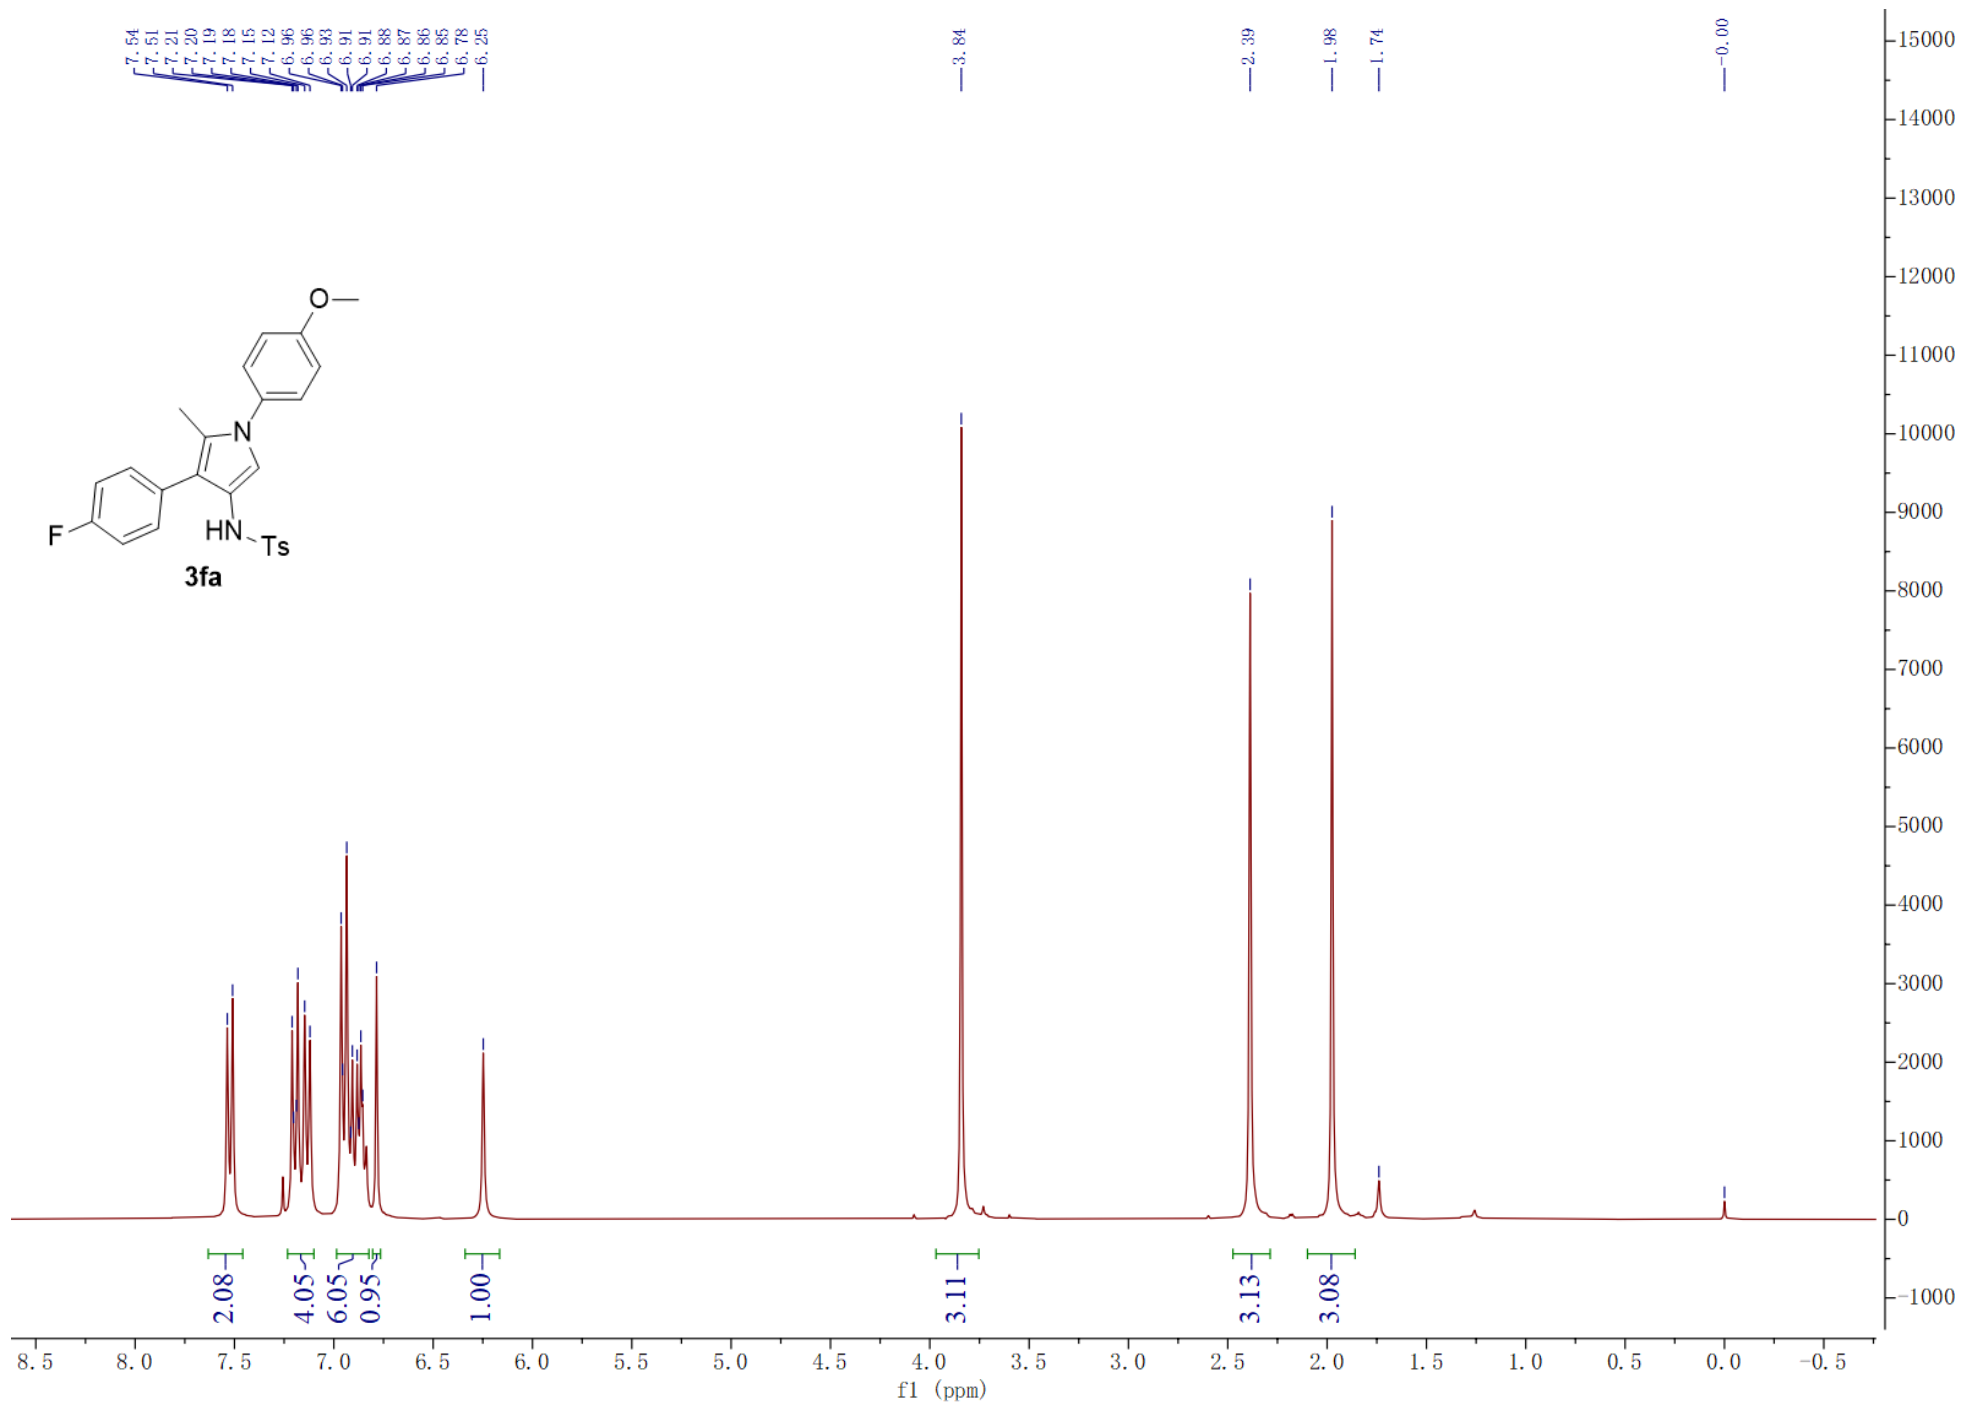

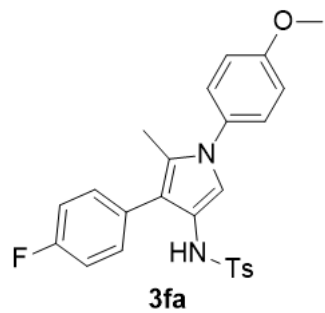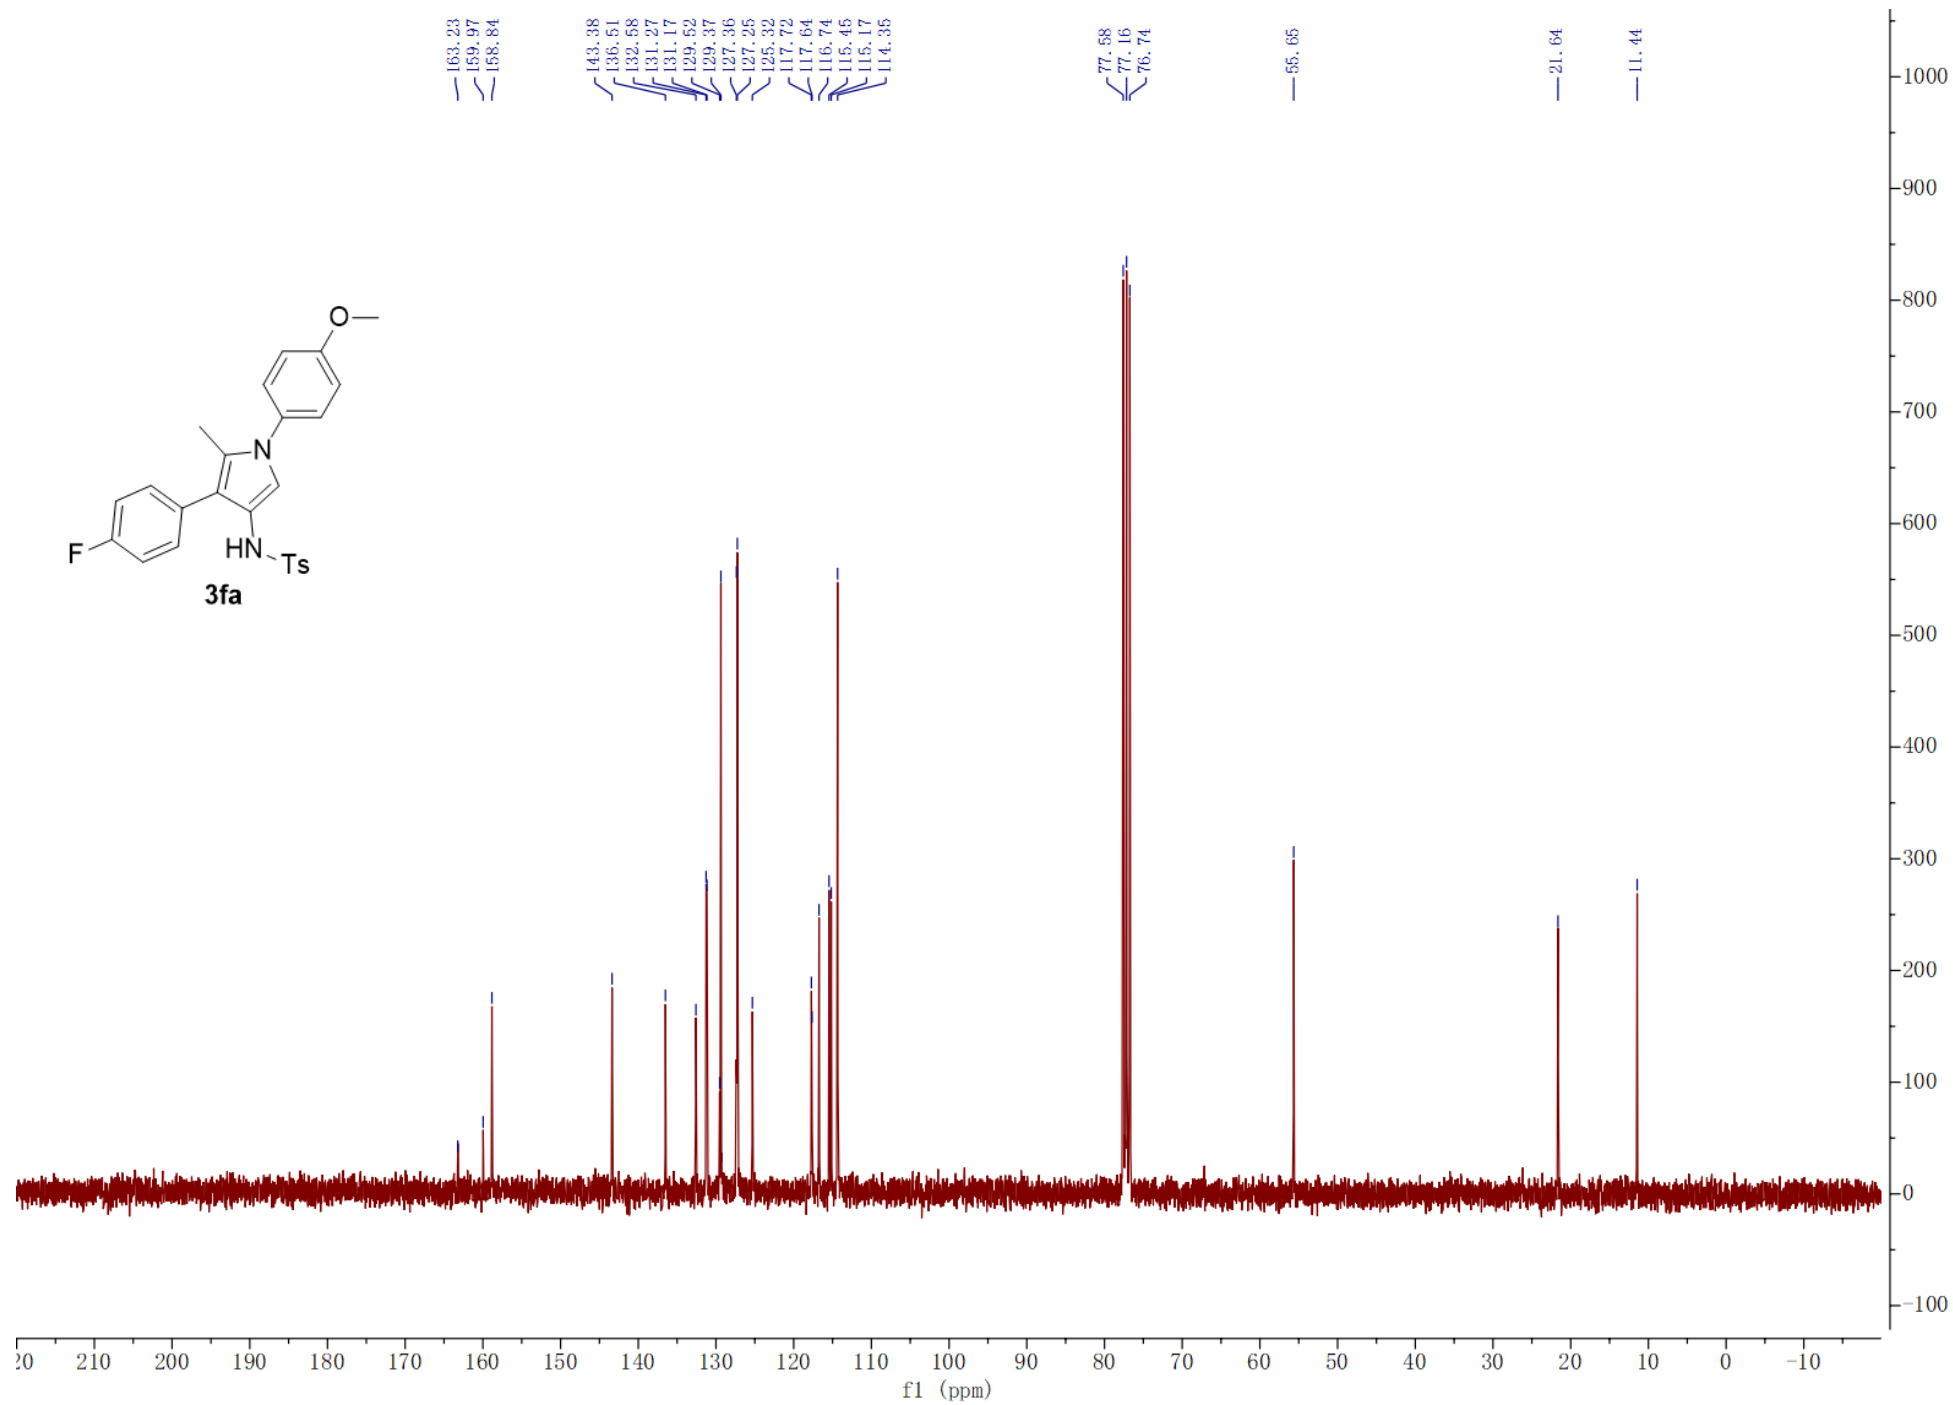

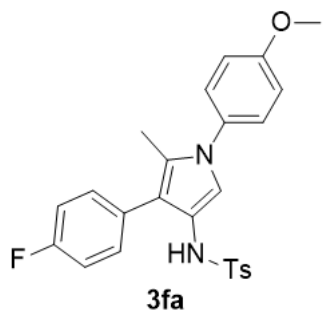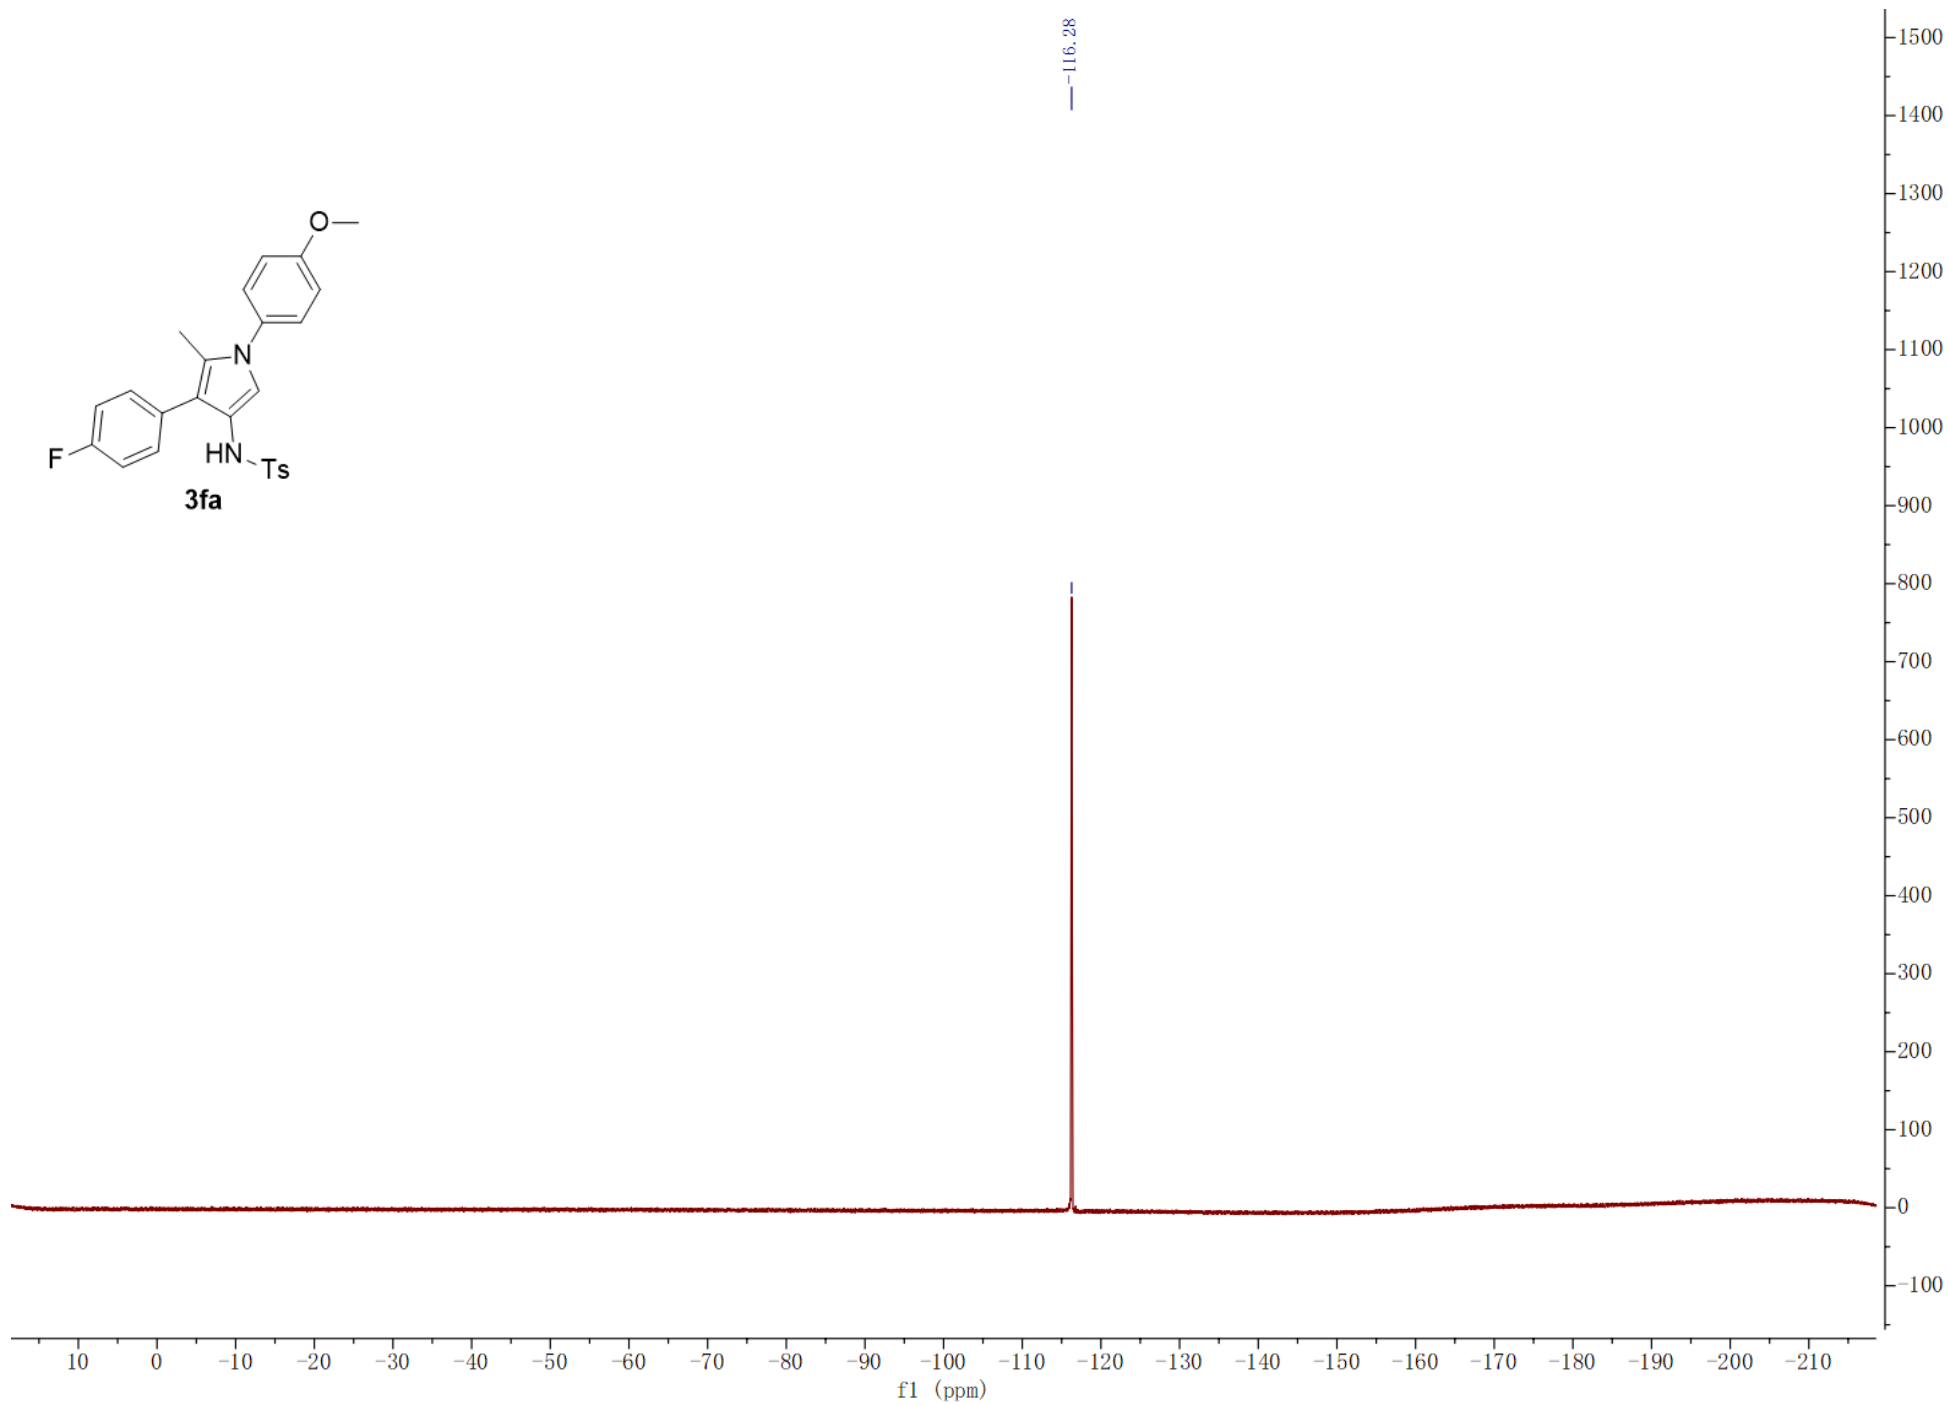



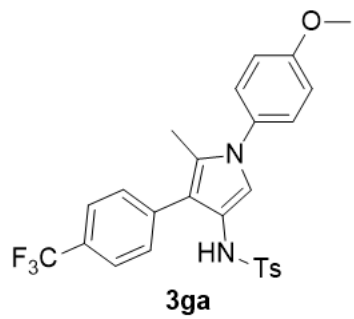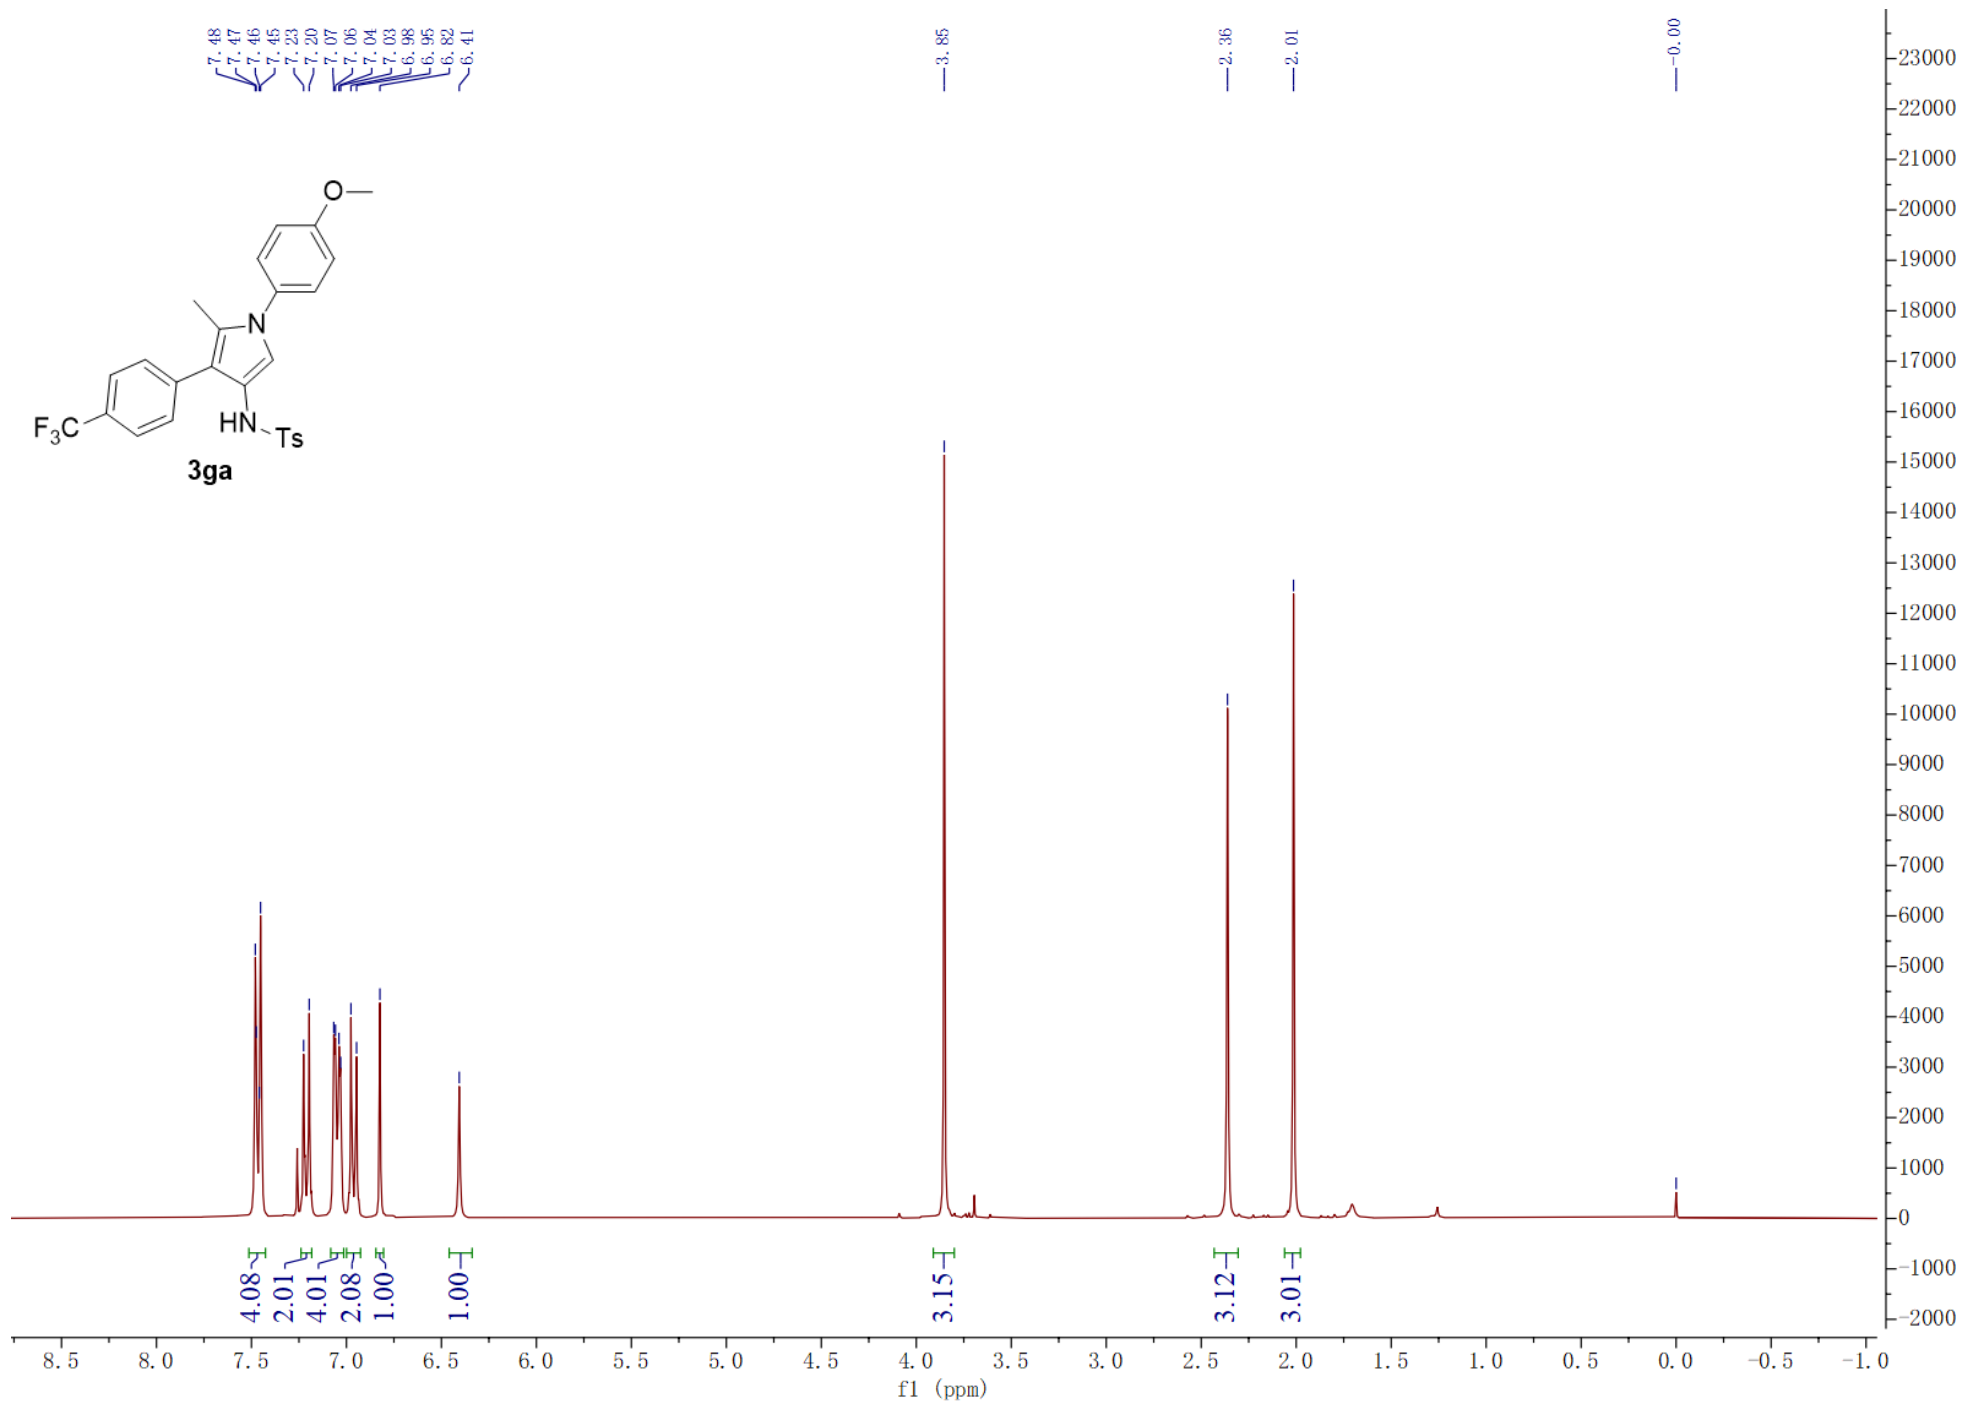

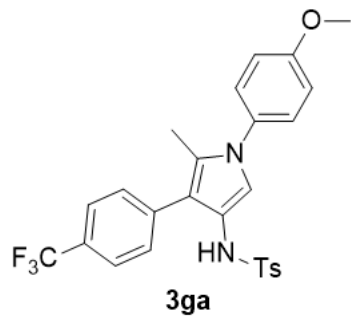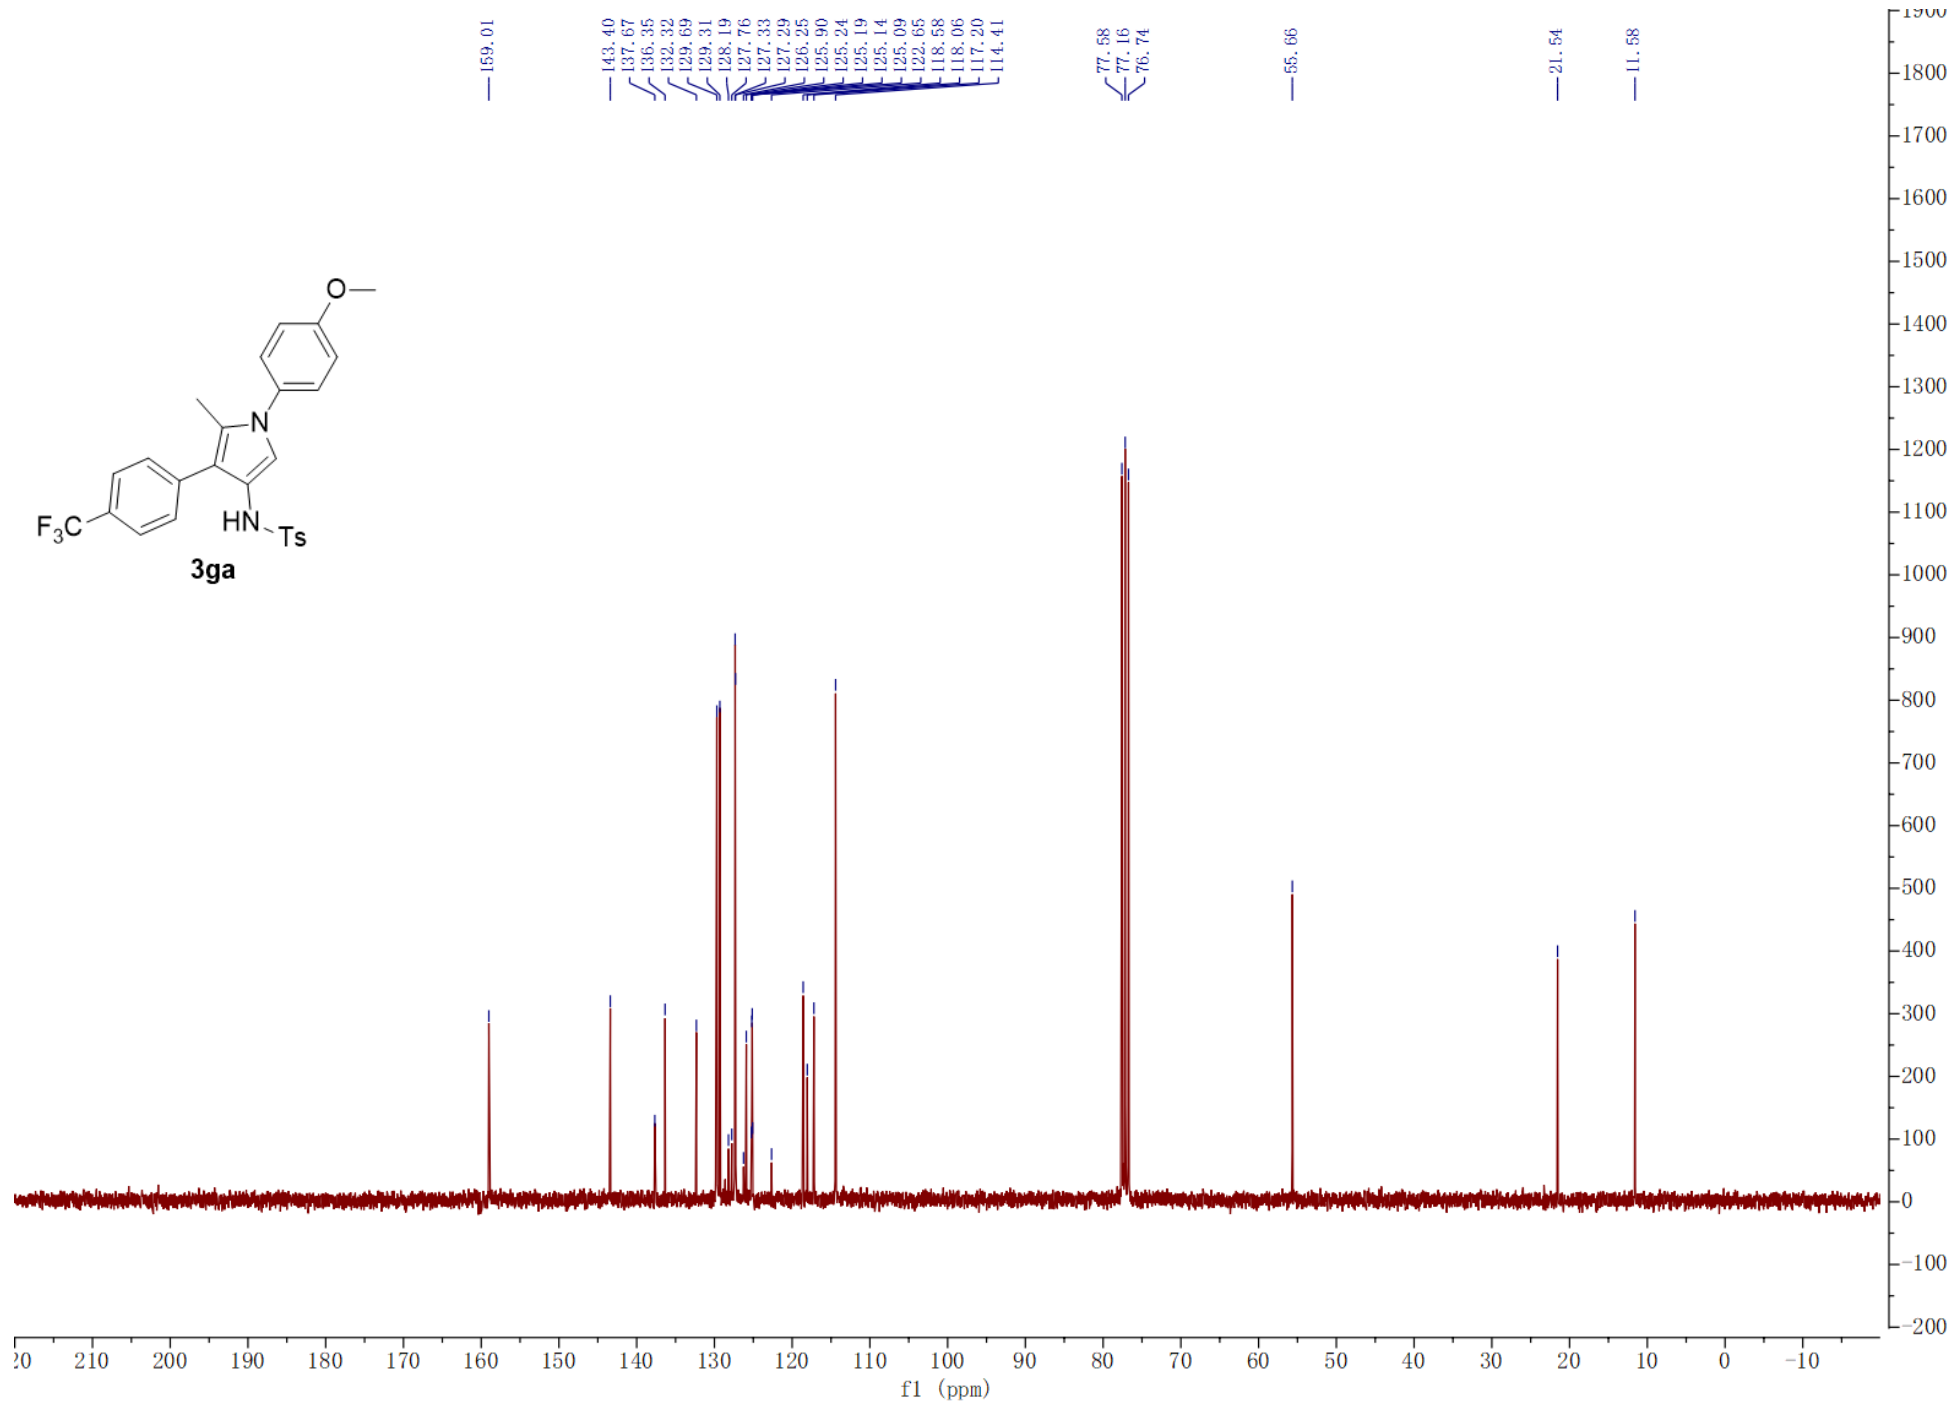

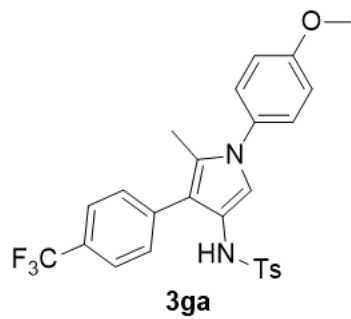

-62.26

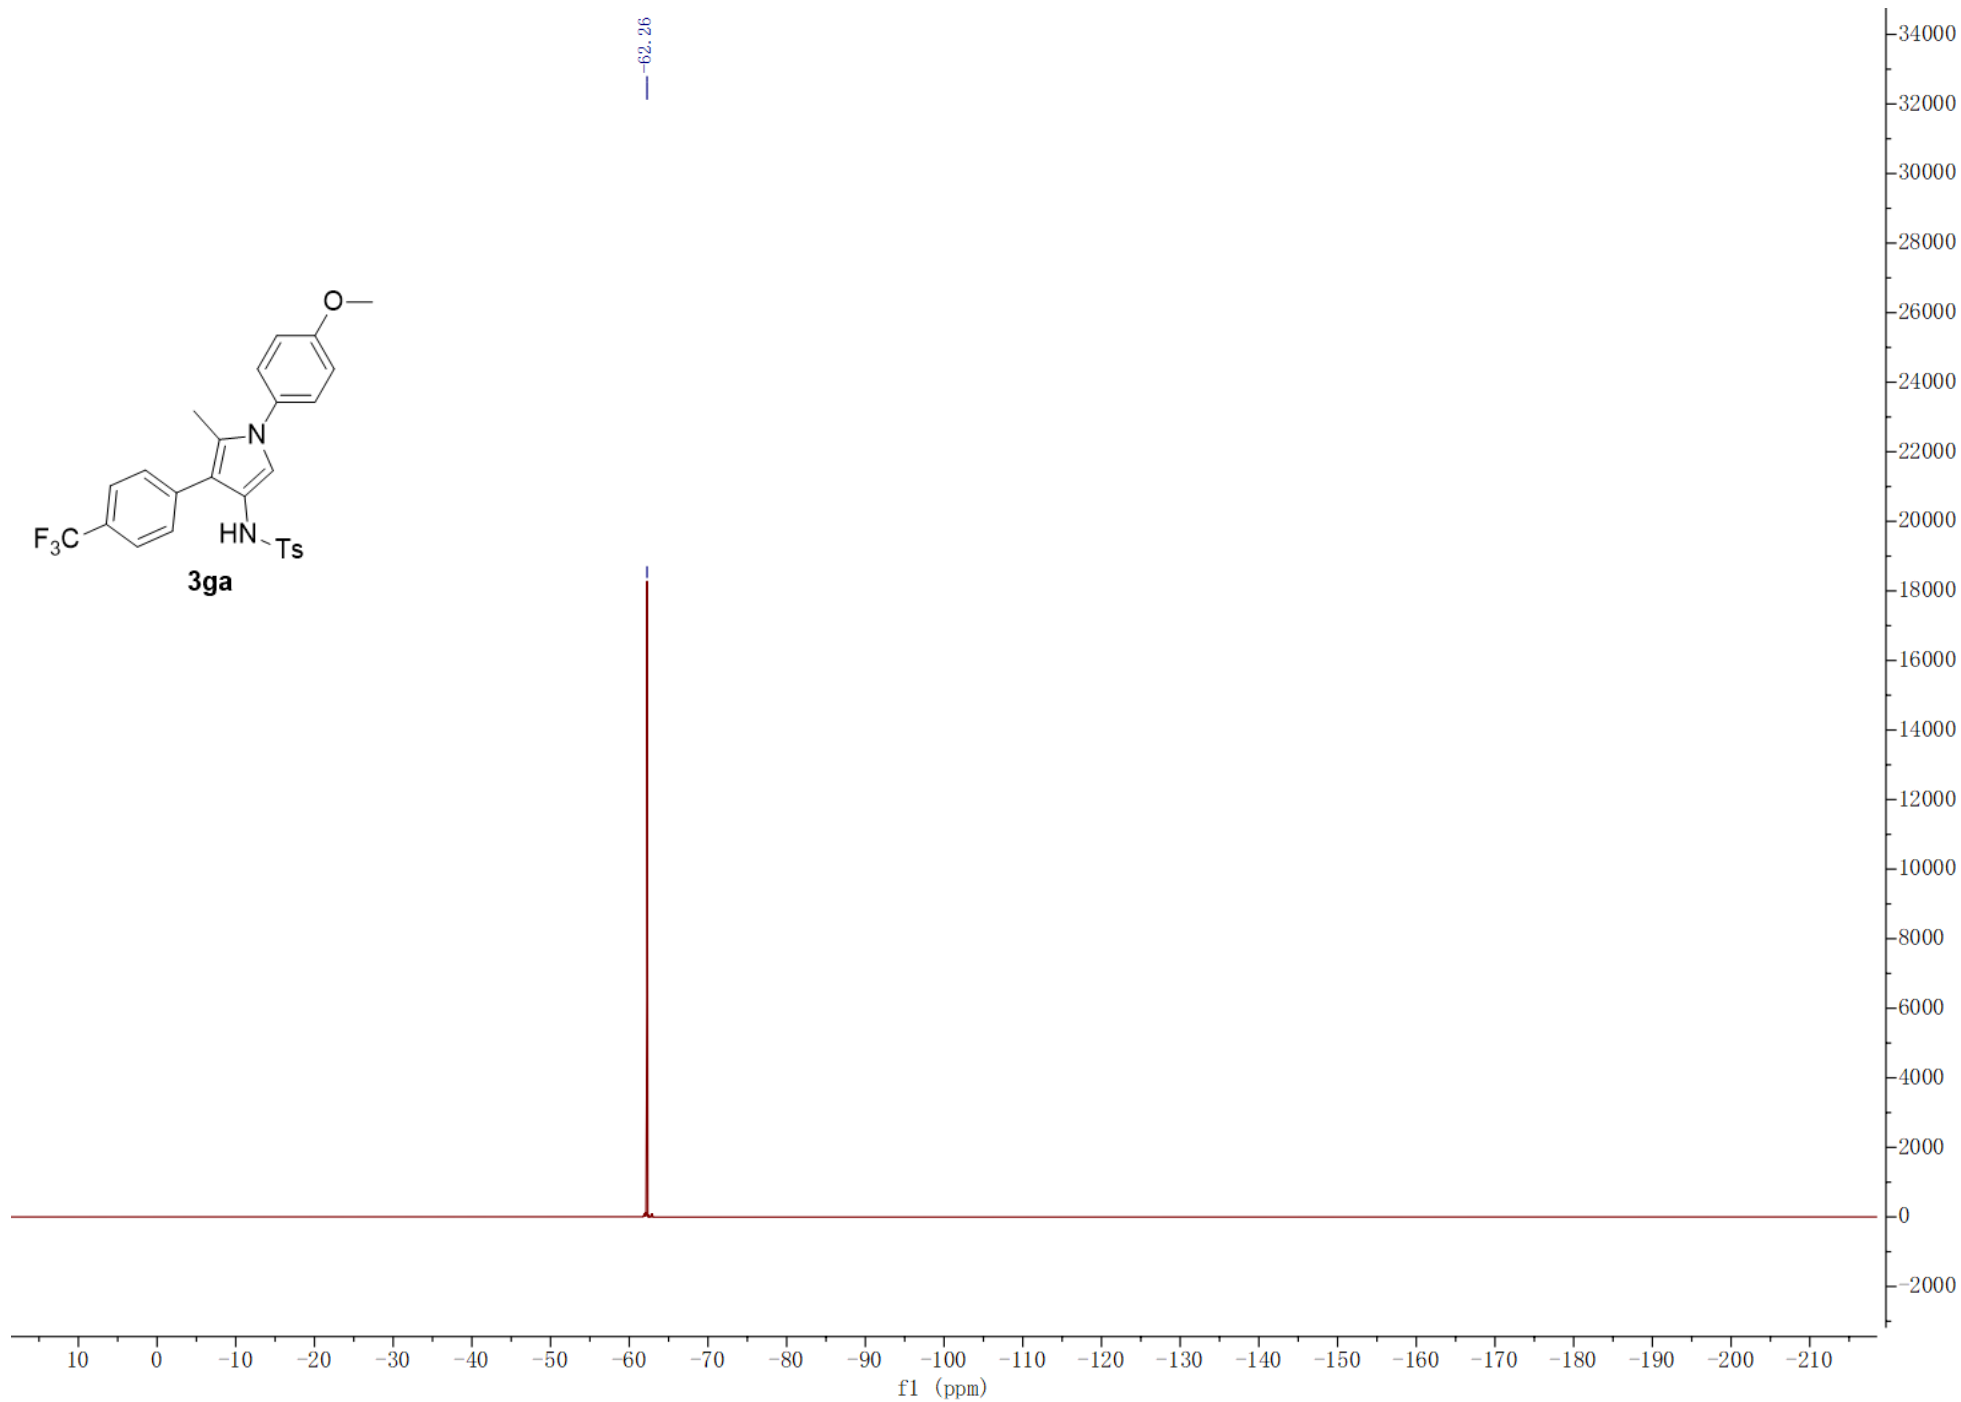

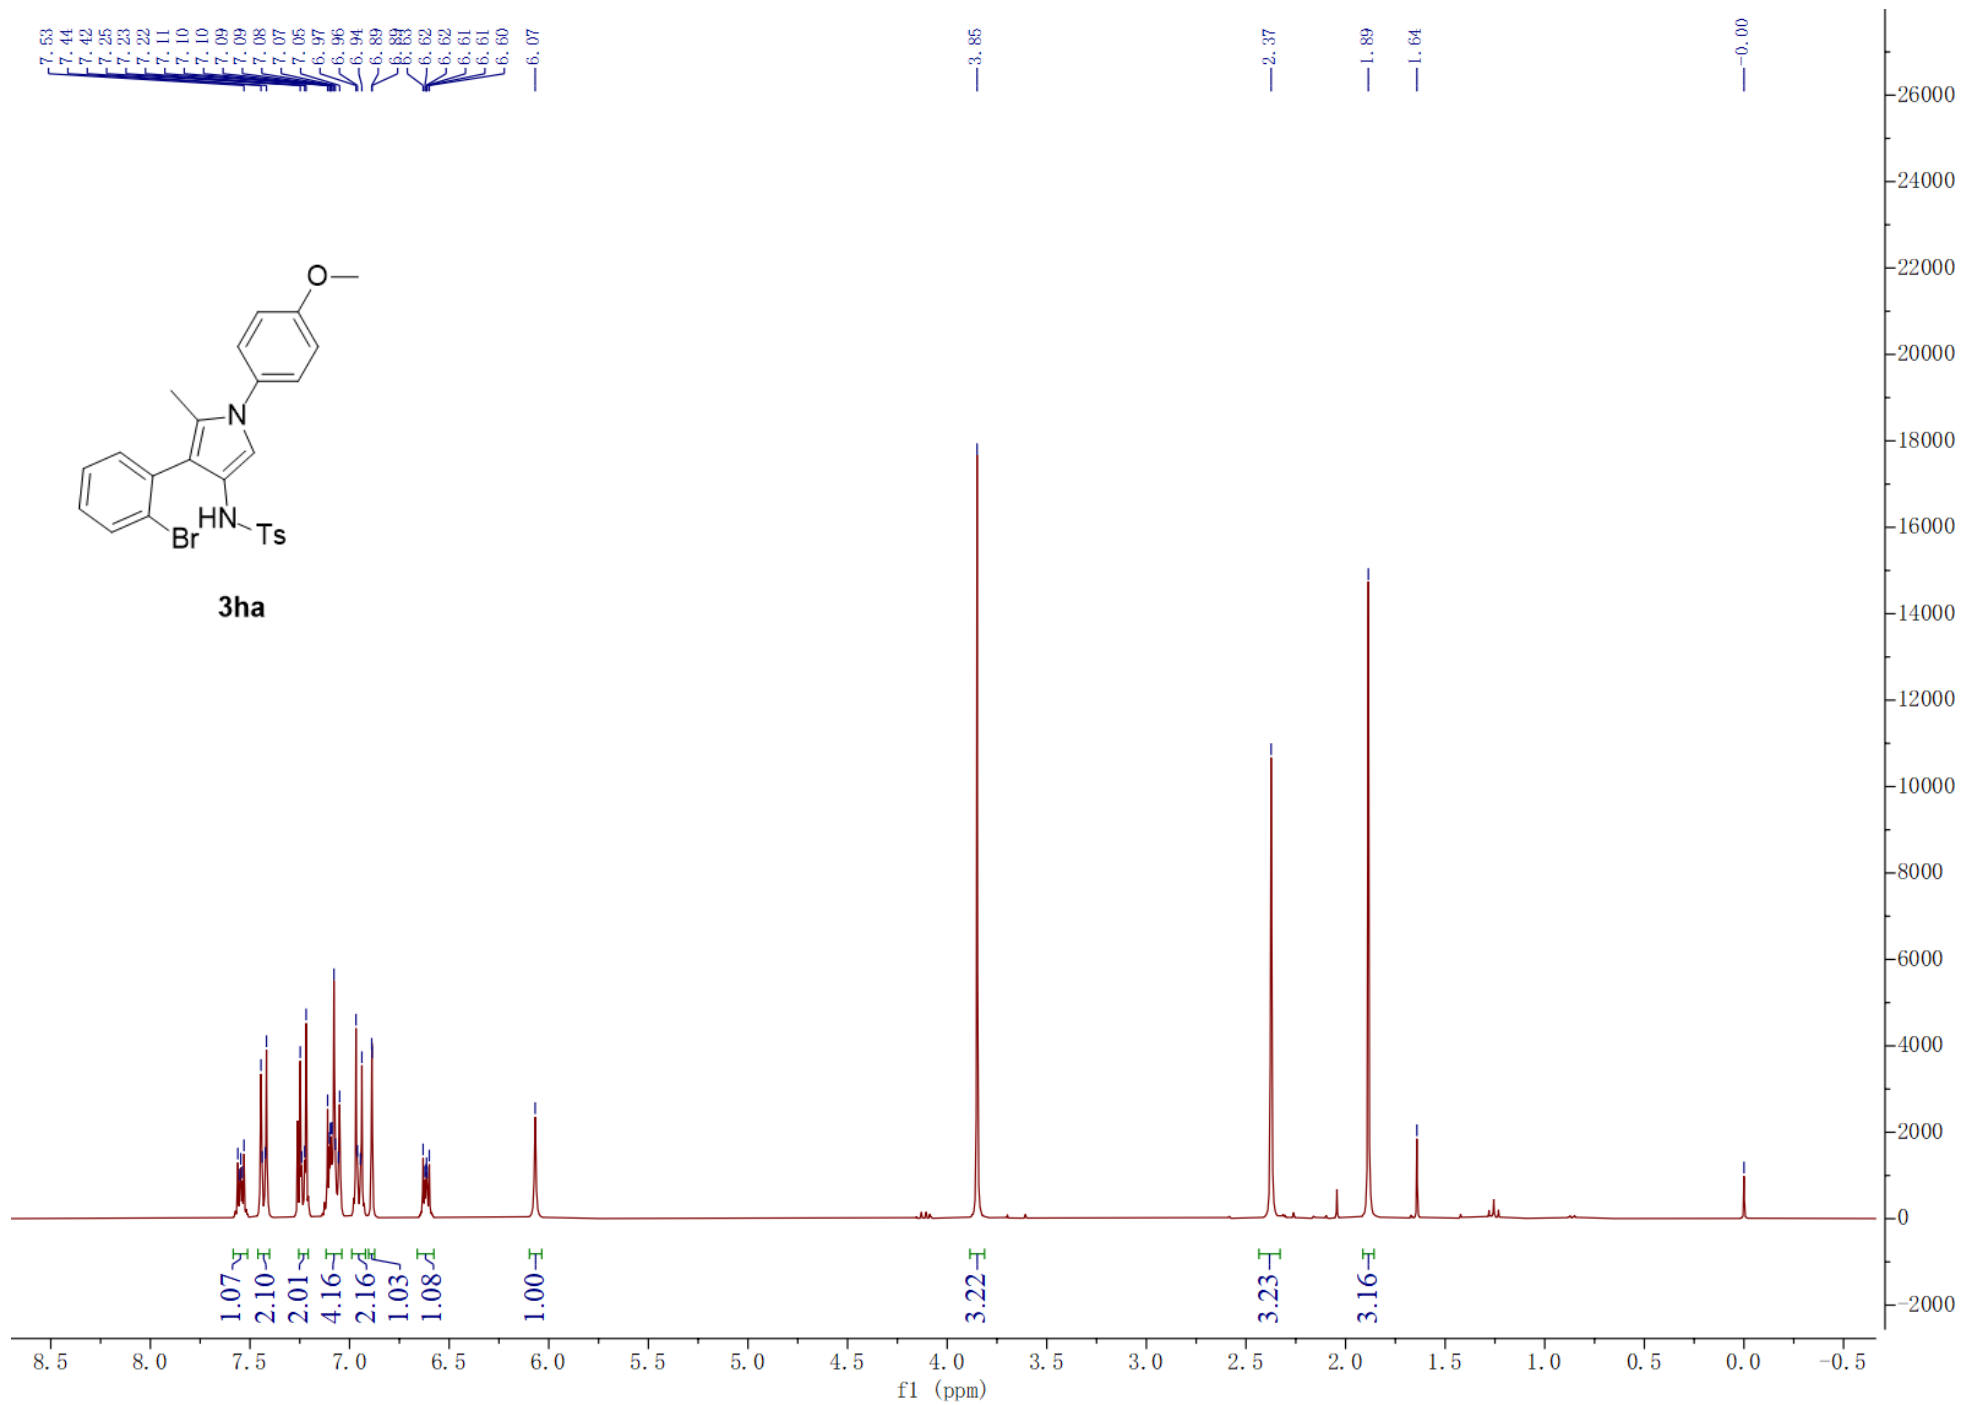

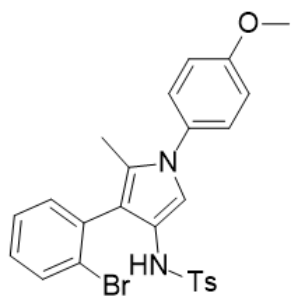

3ha

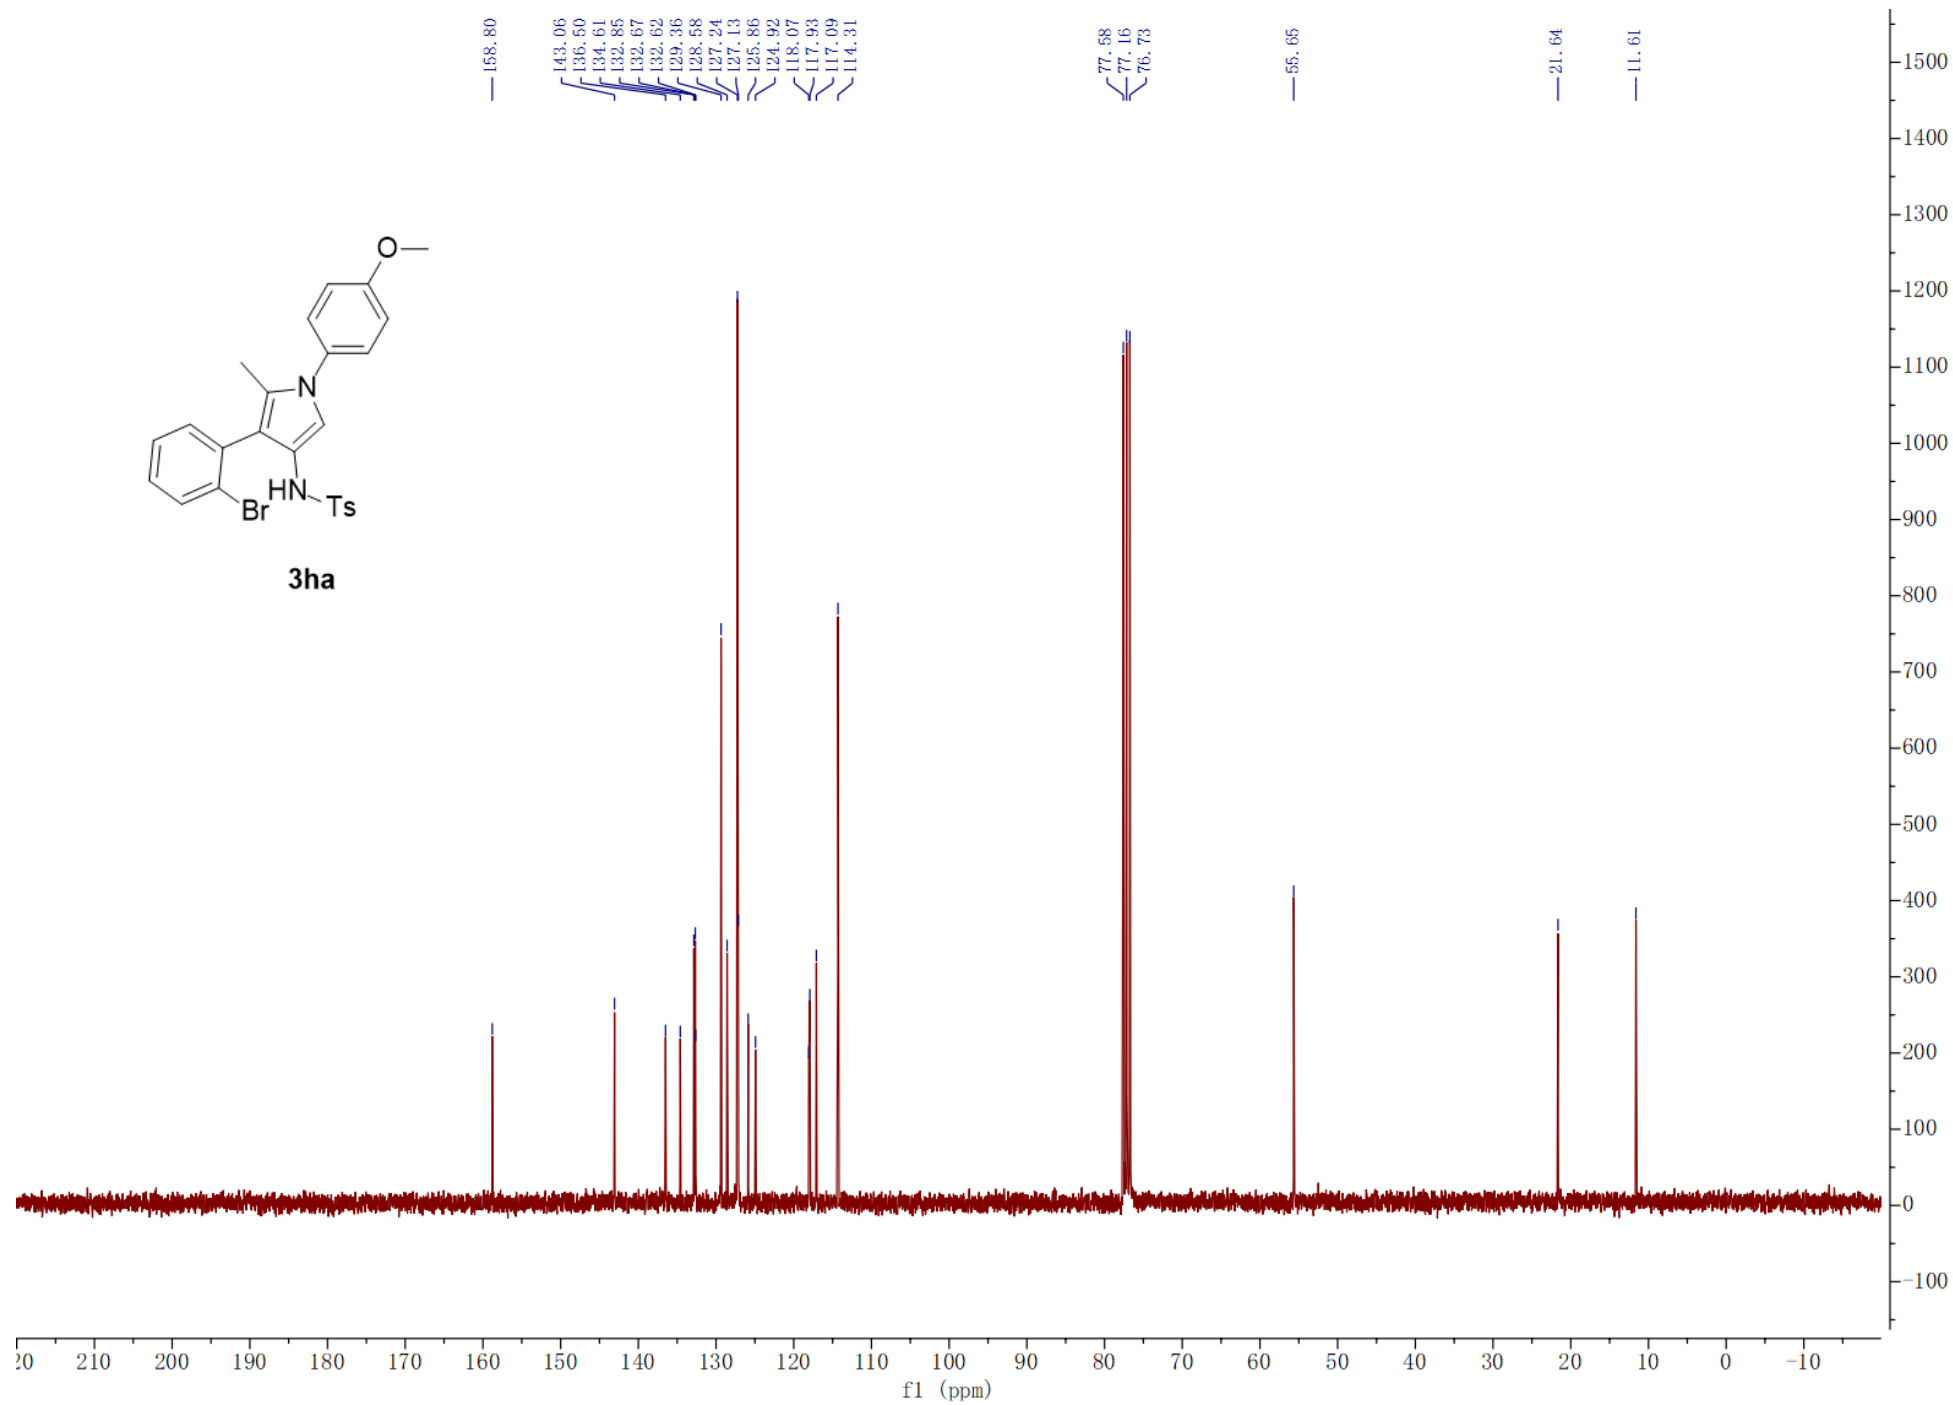

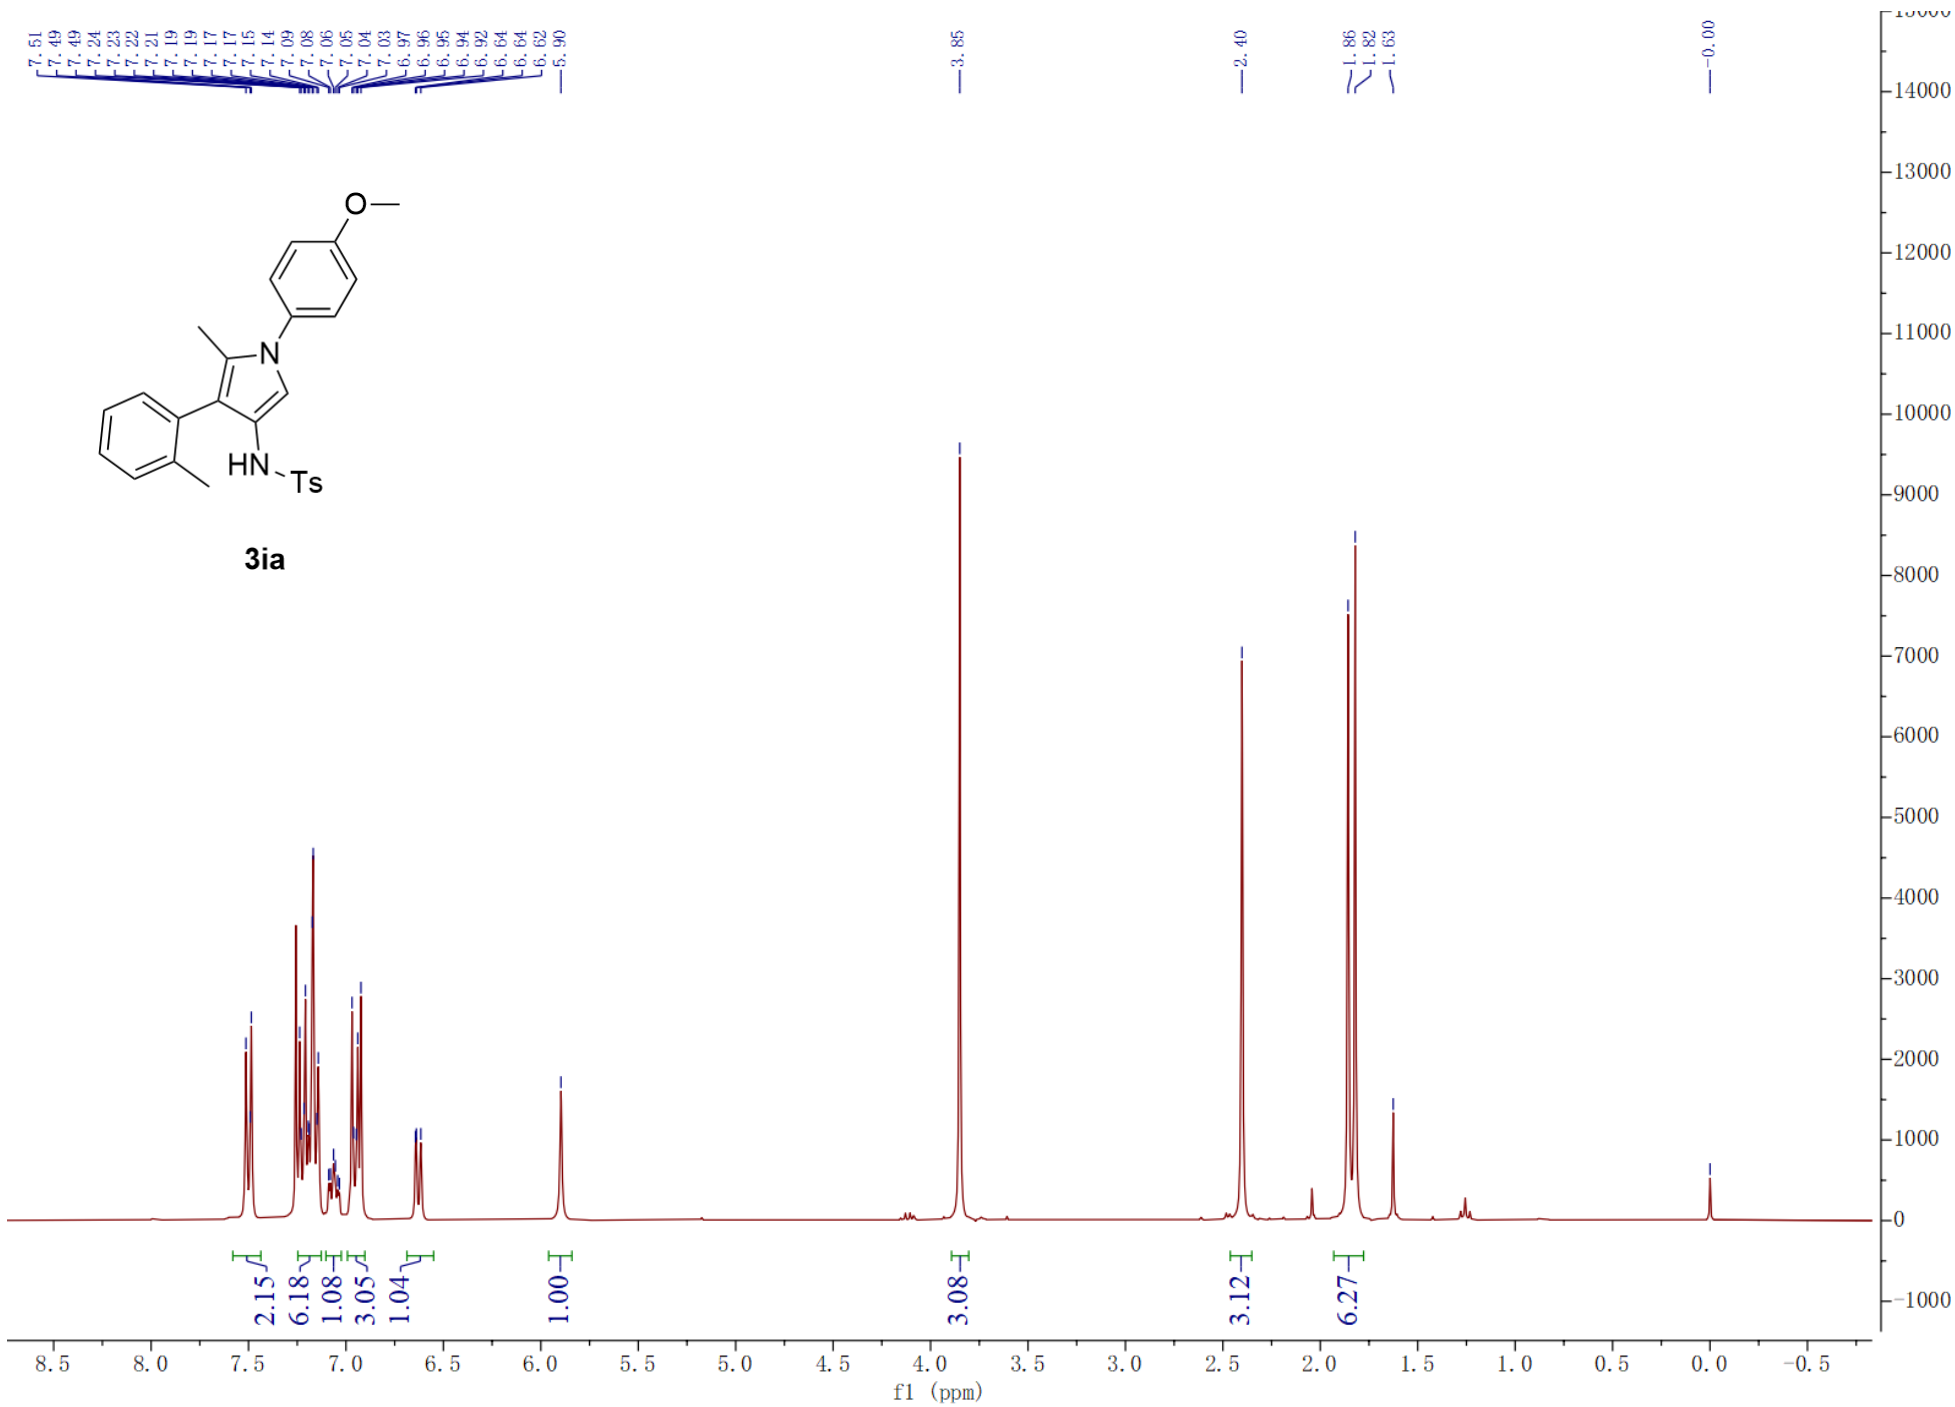

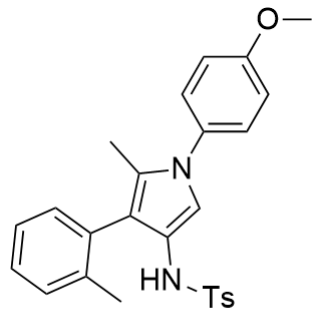

**3ia**

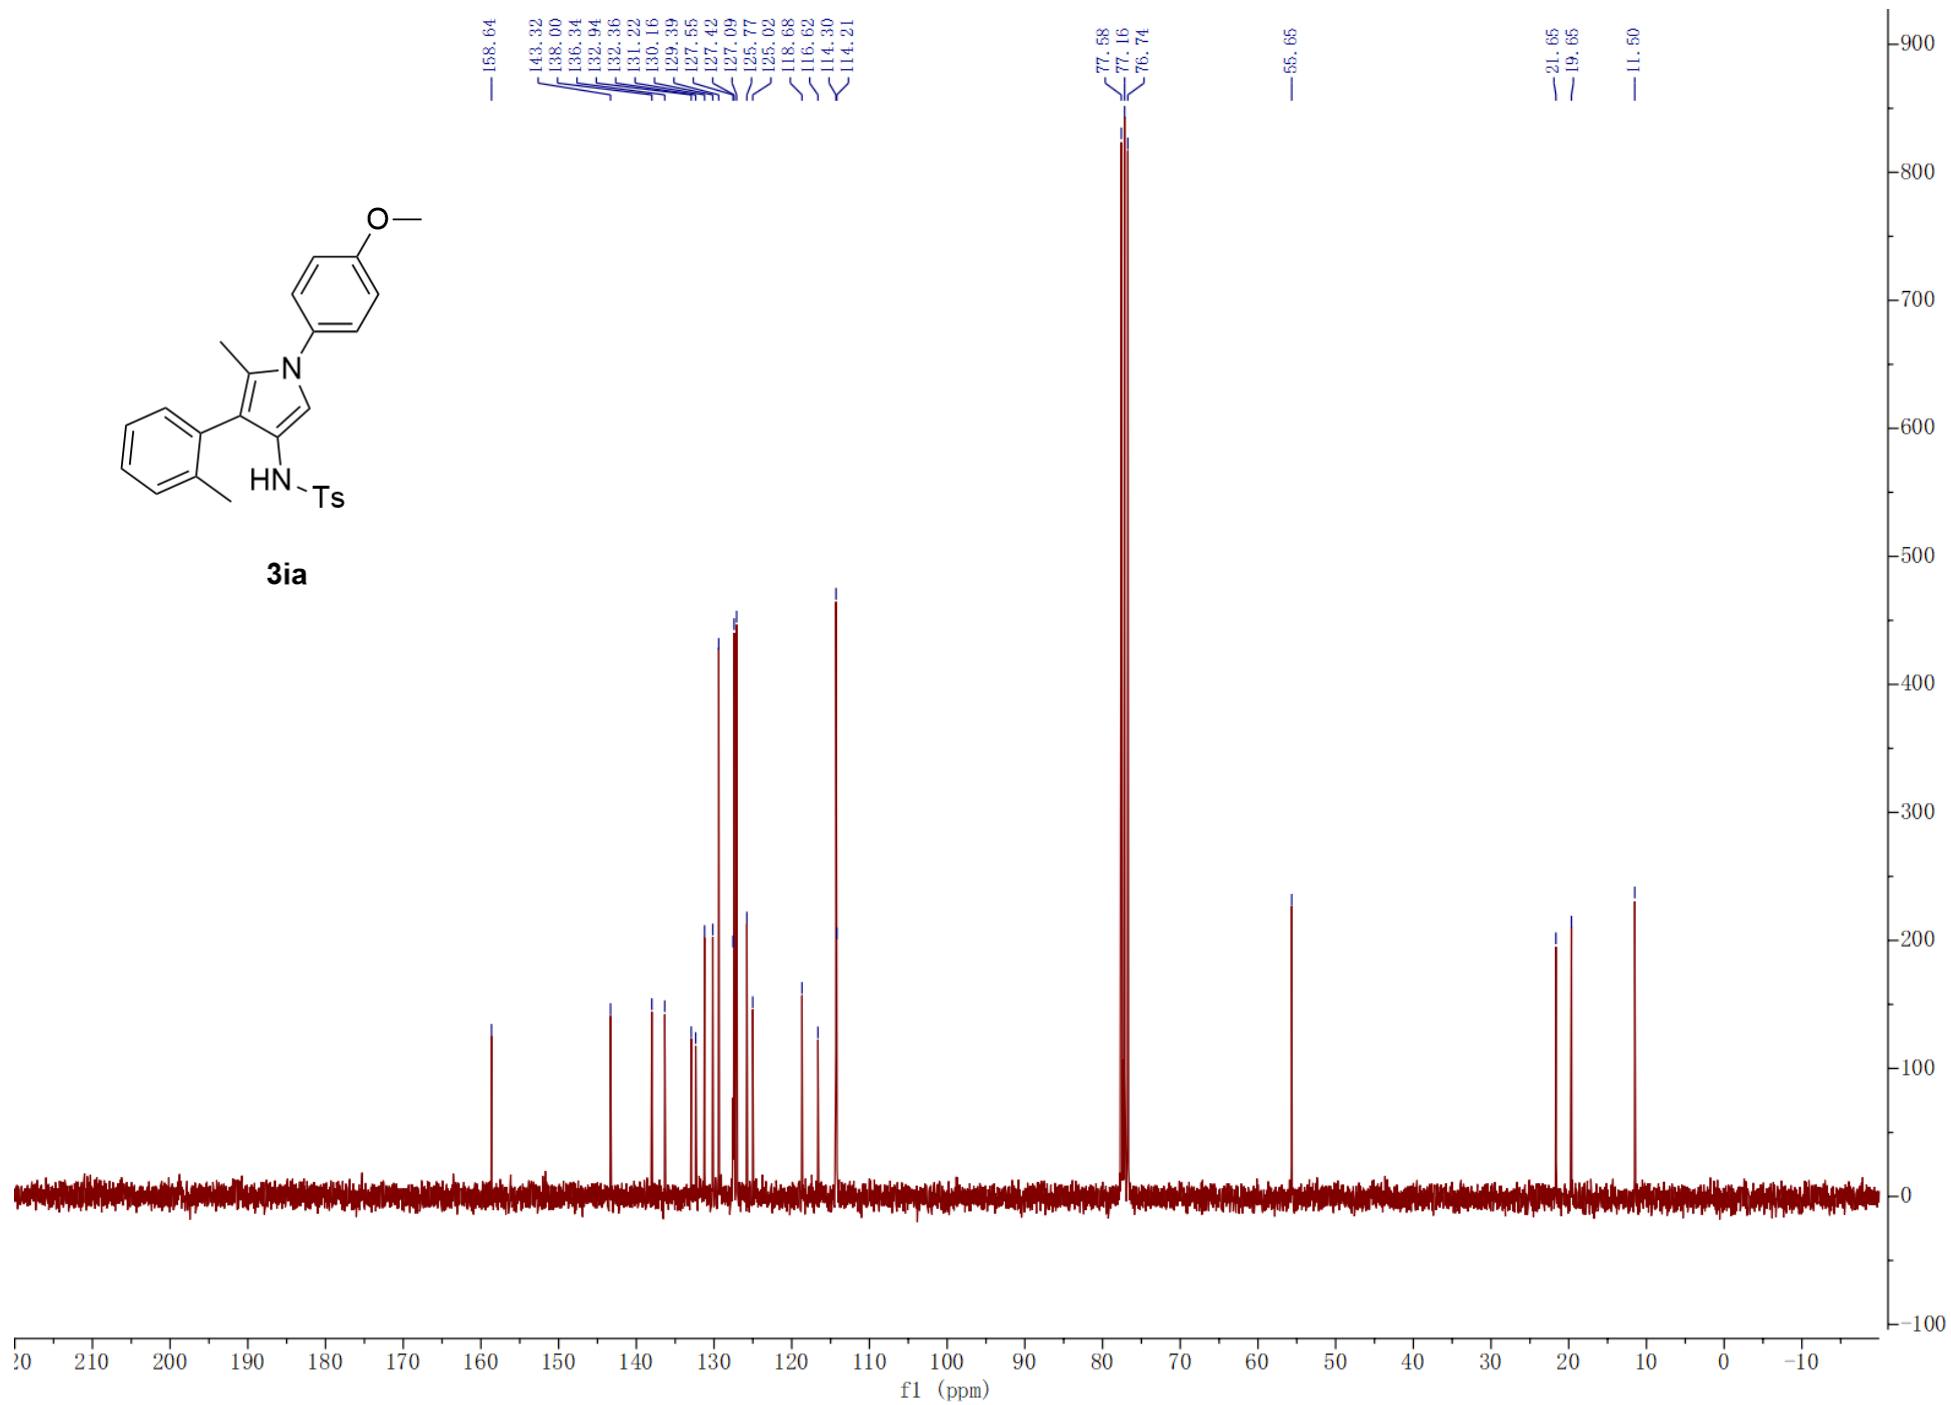

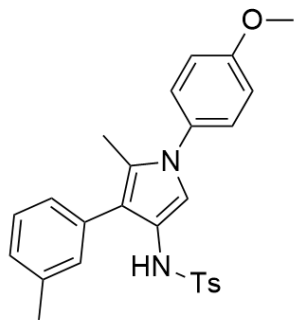

**3ja**

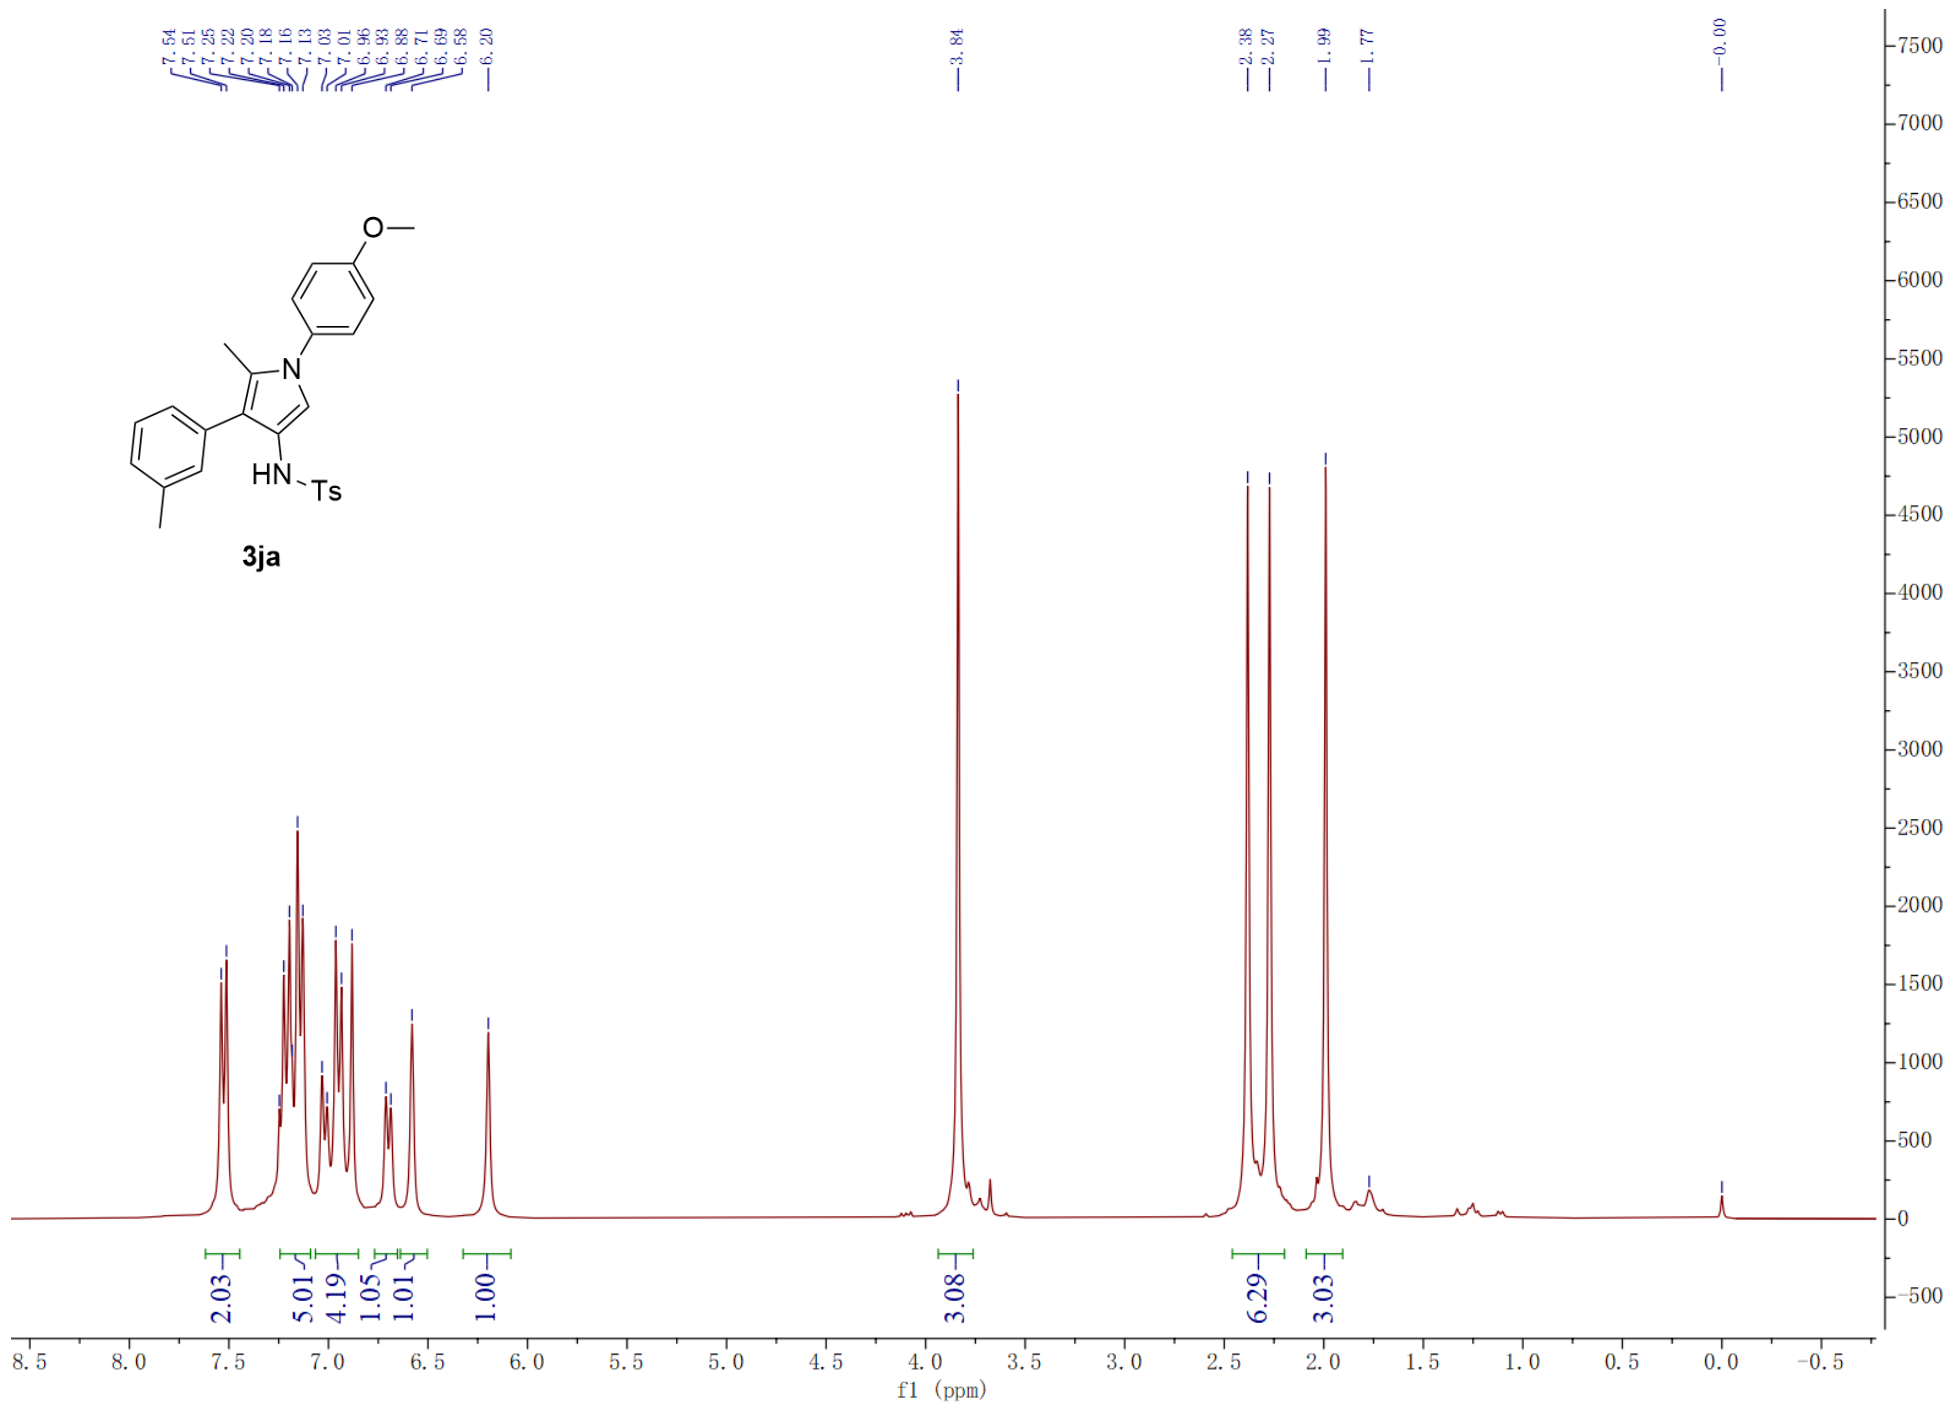



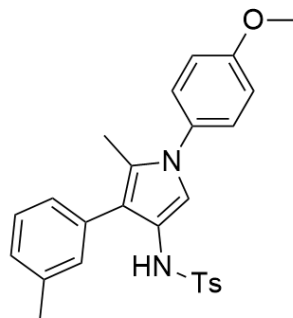

**3ja**

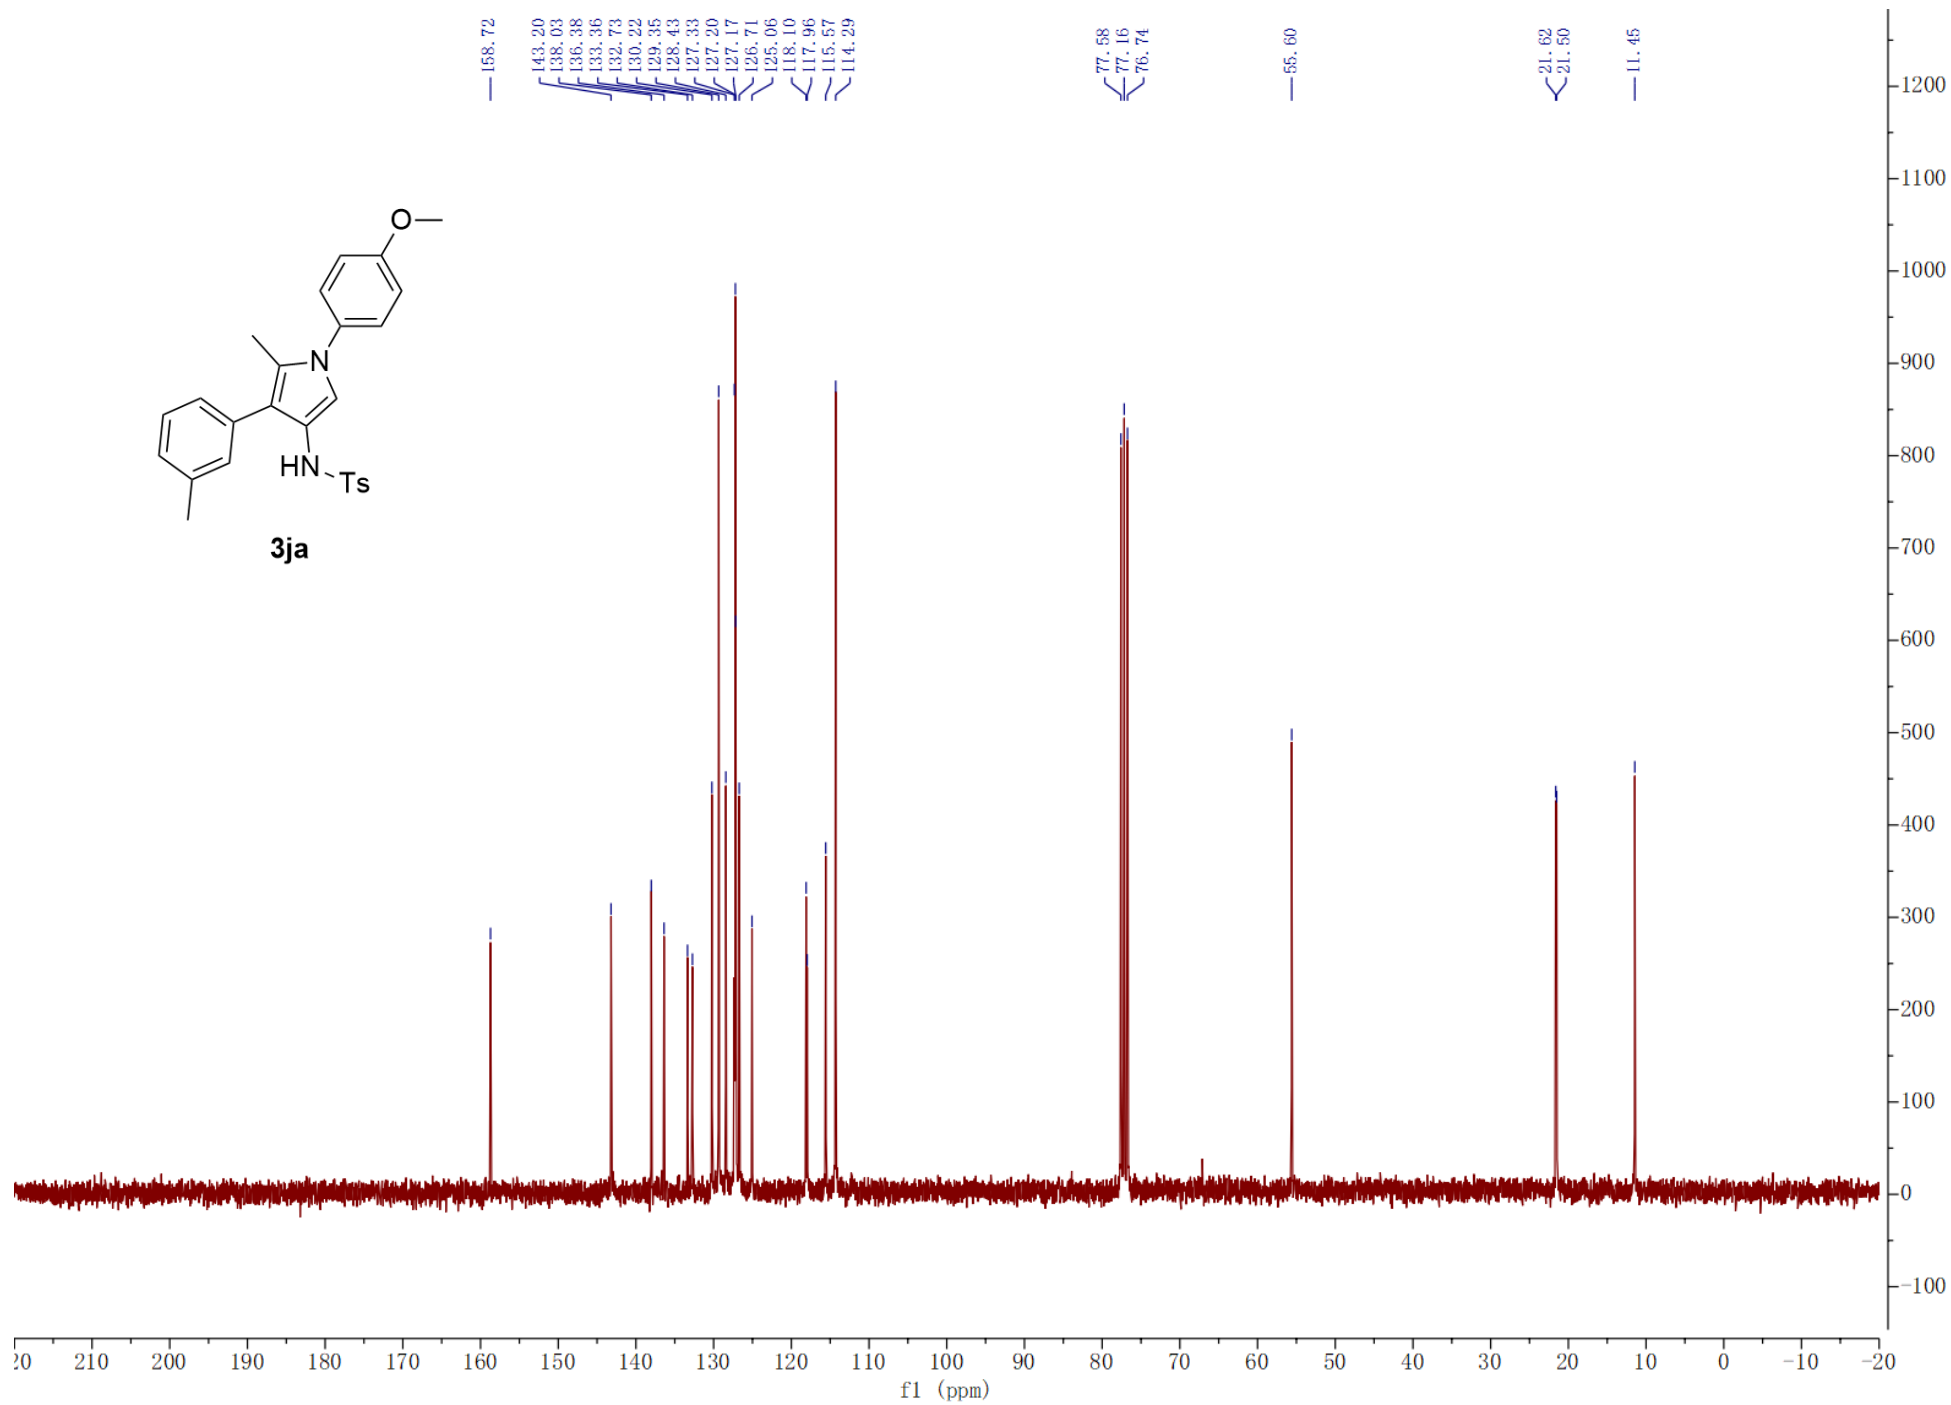

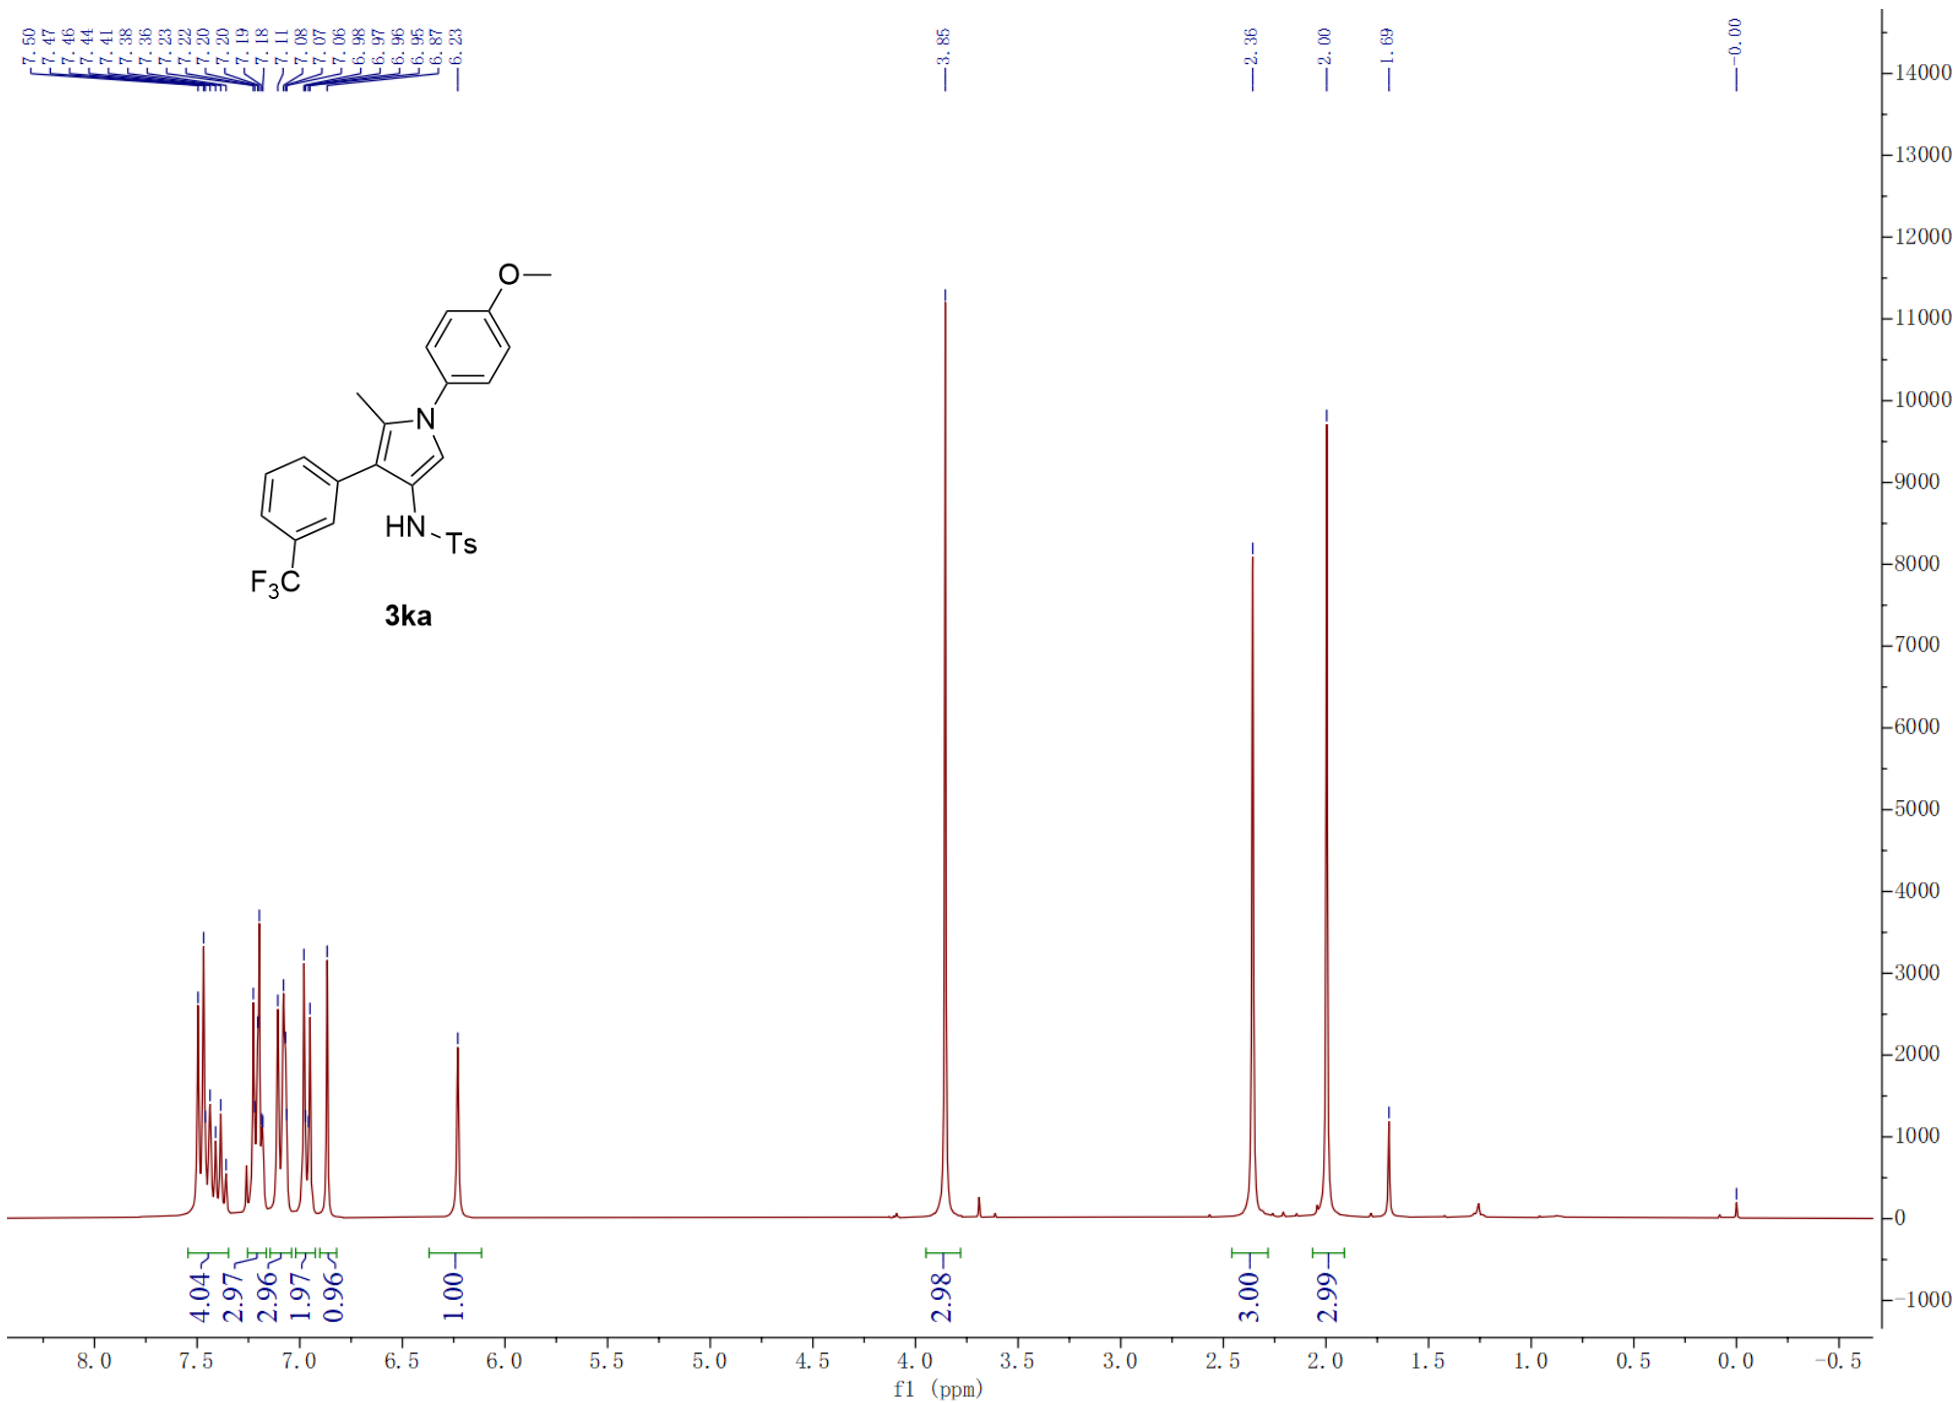

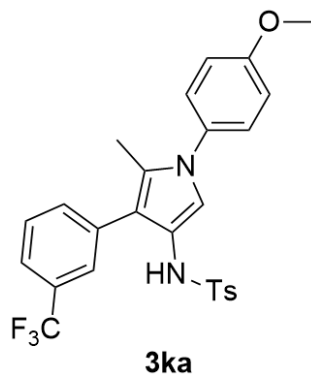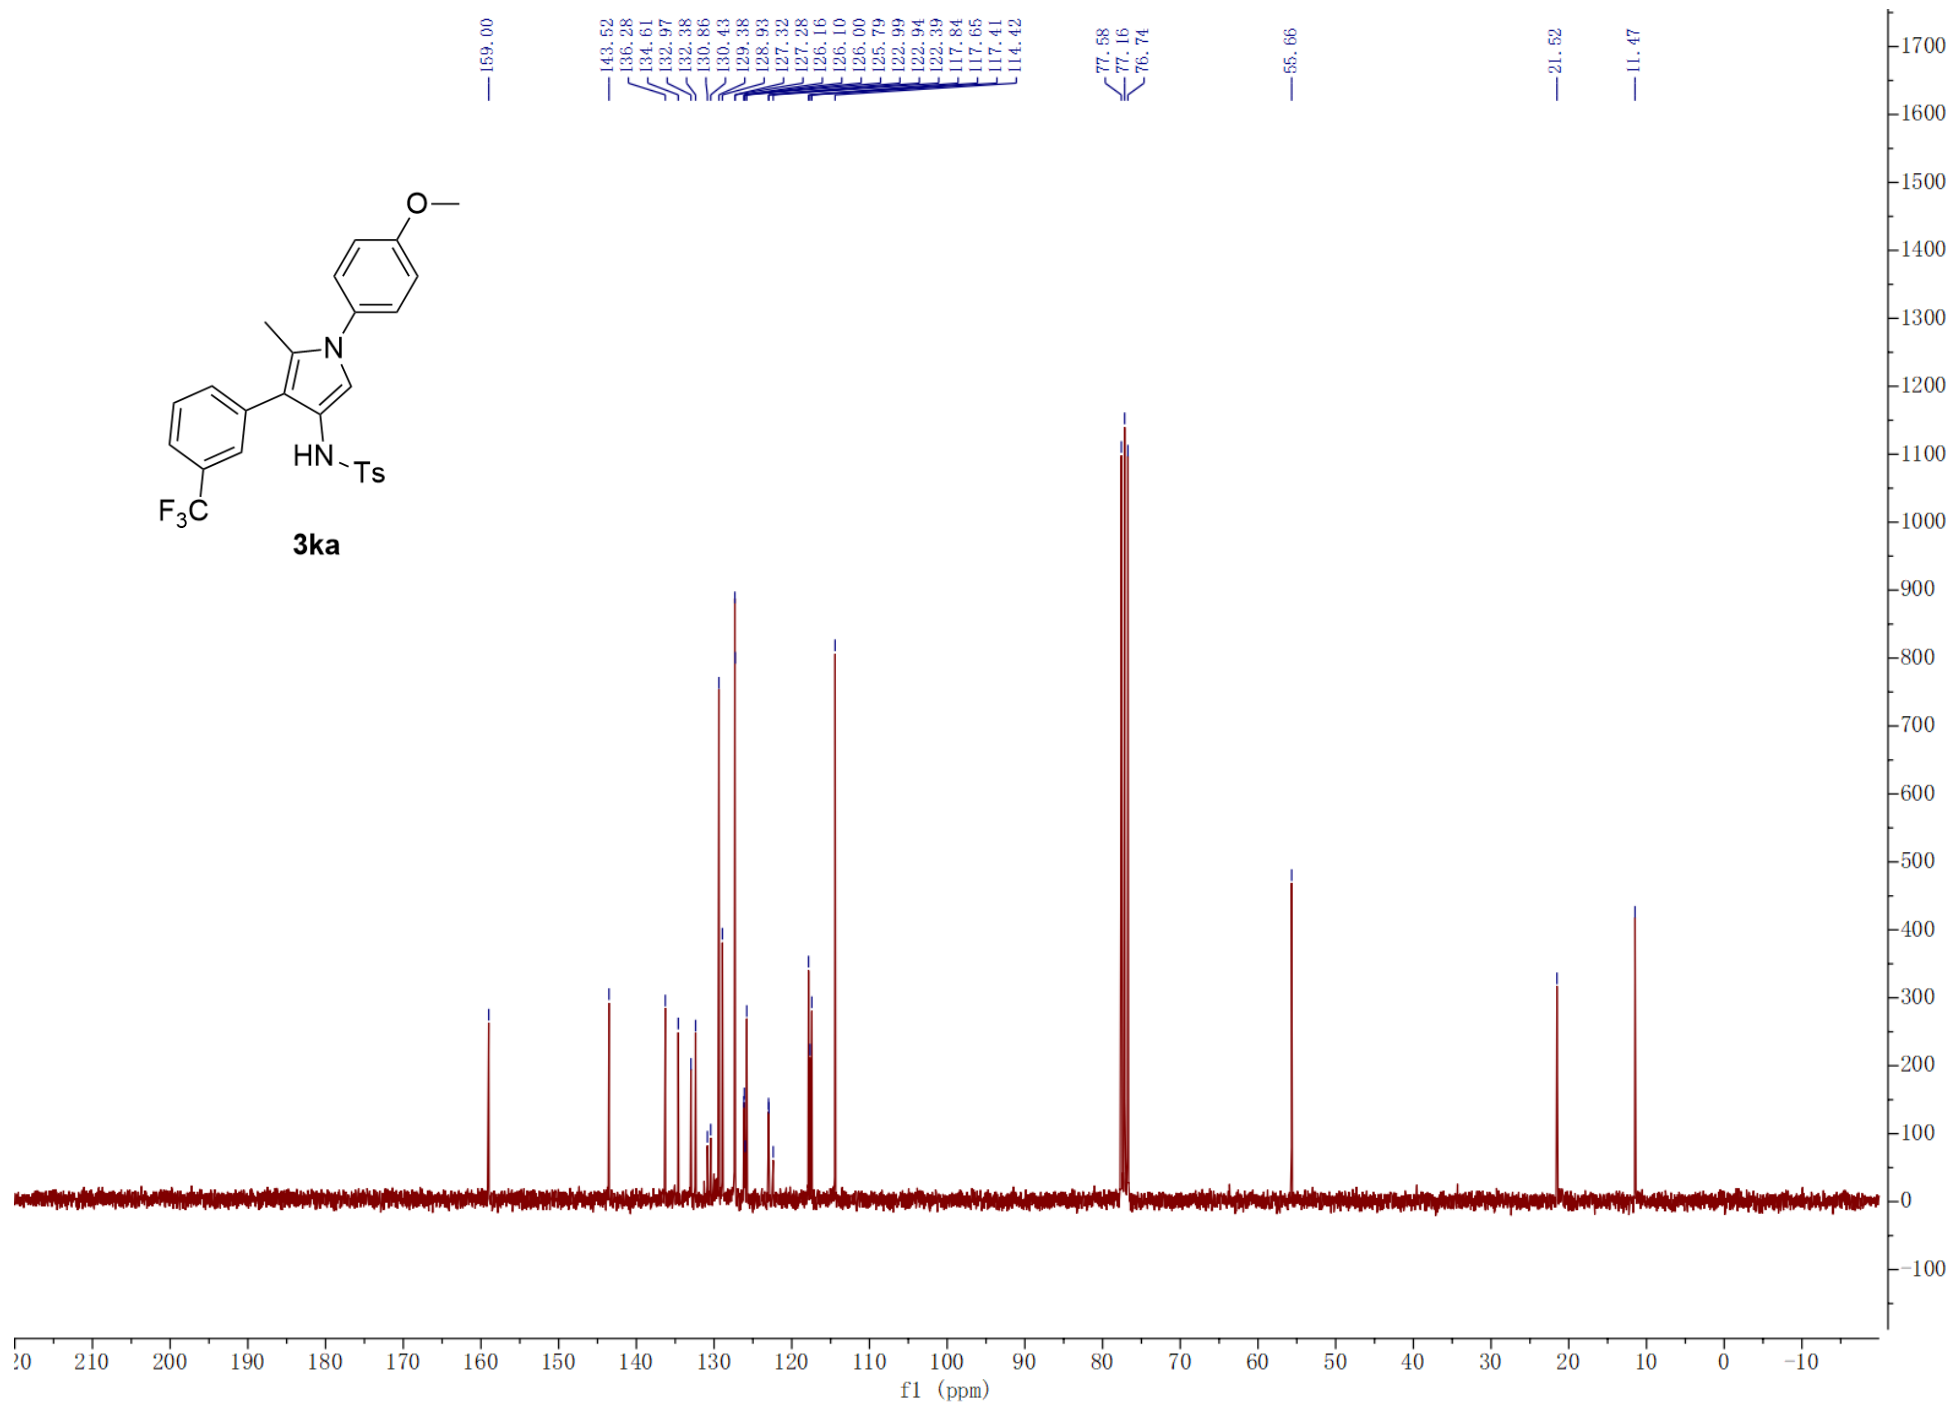

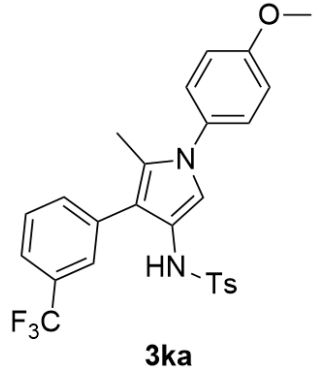

-62.39

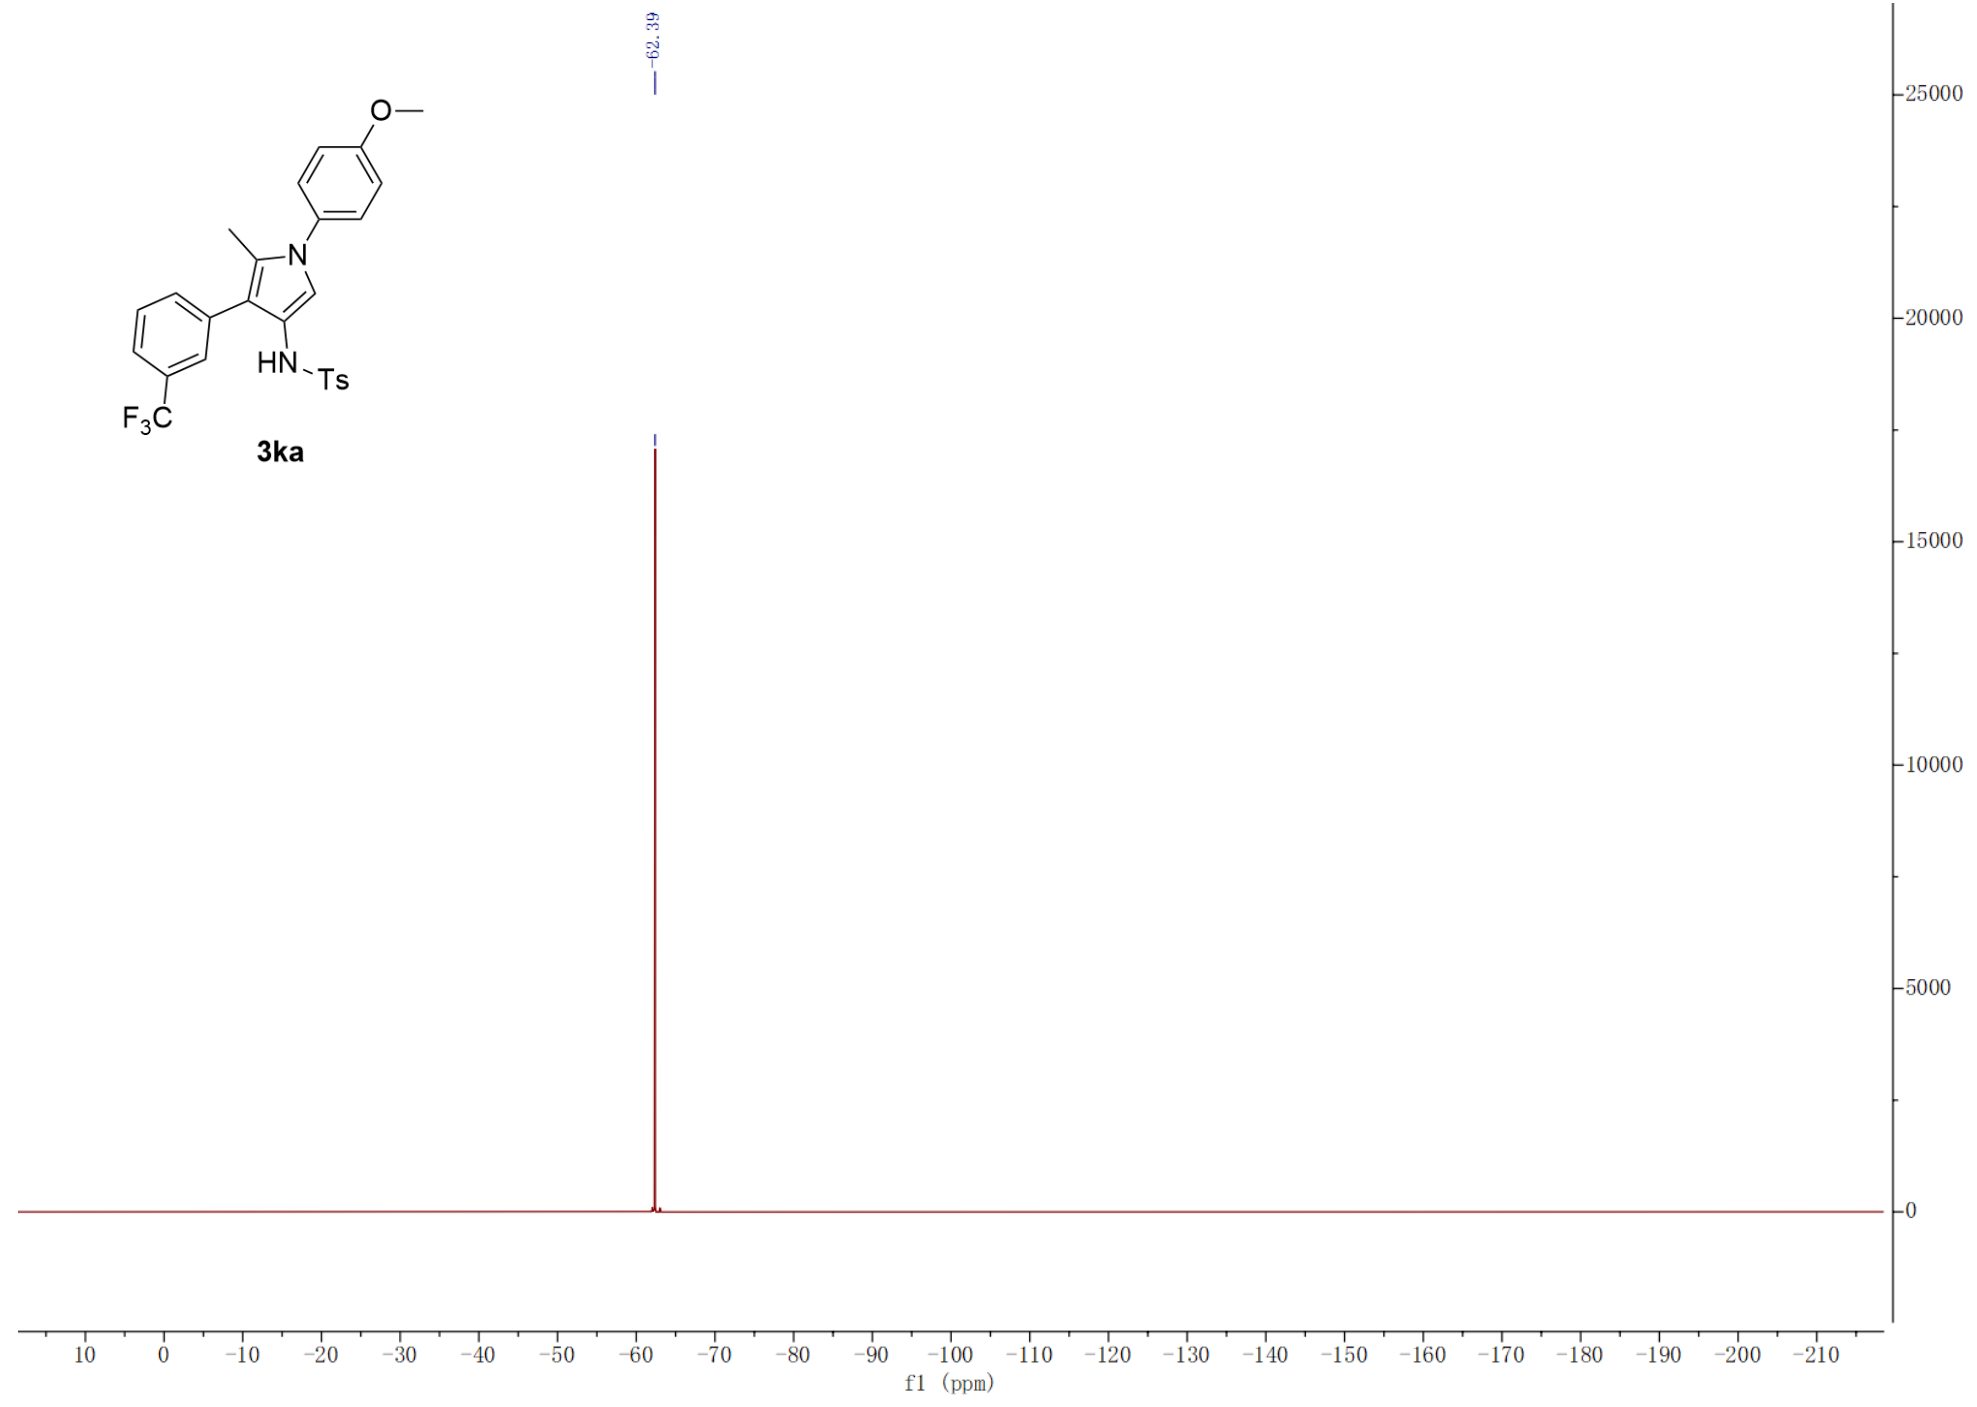

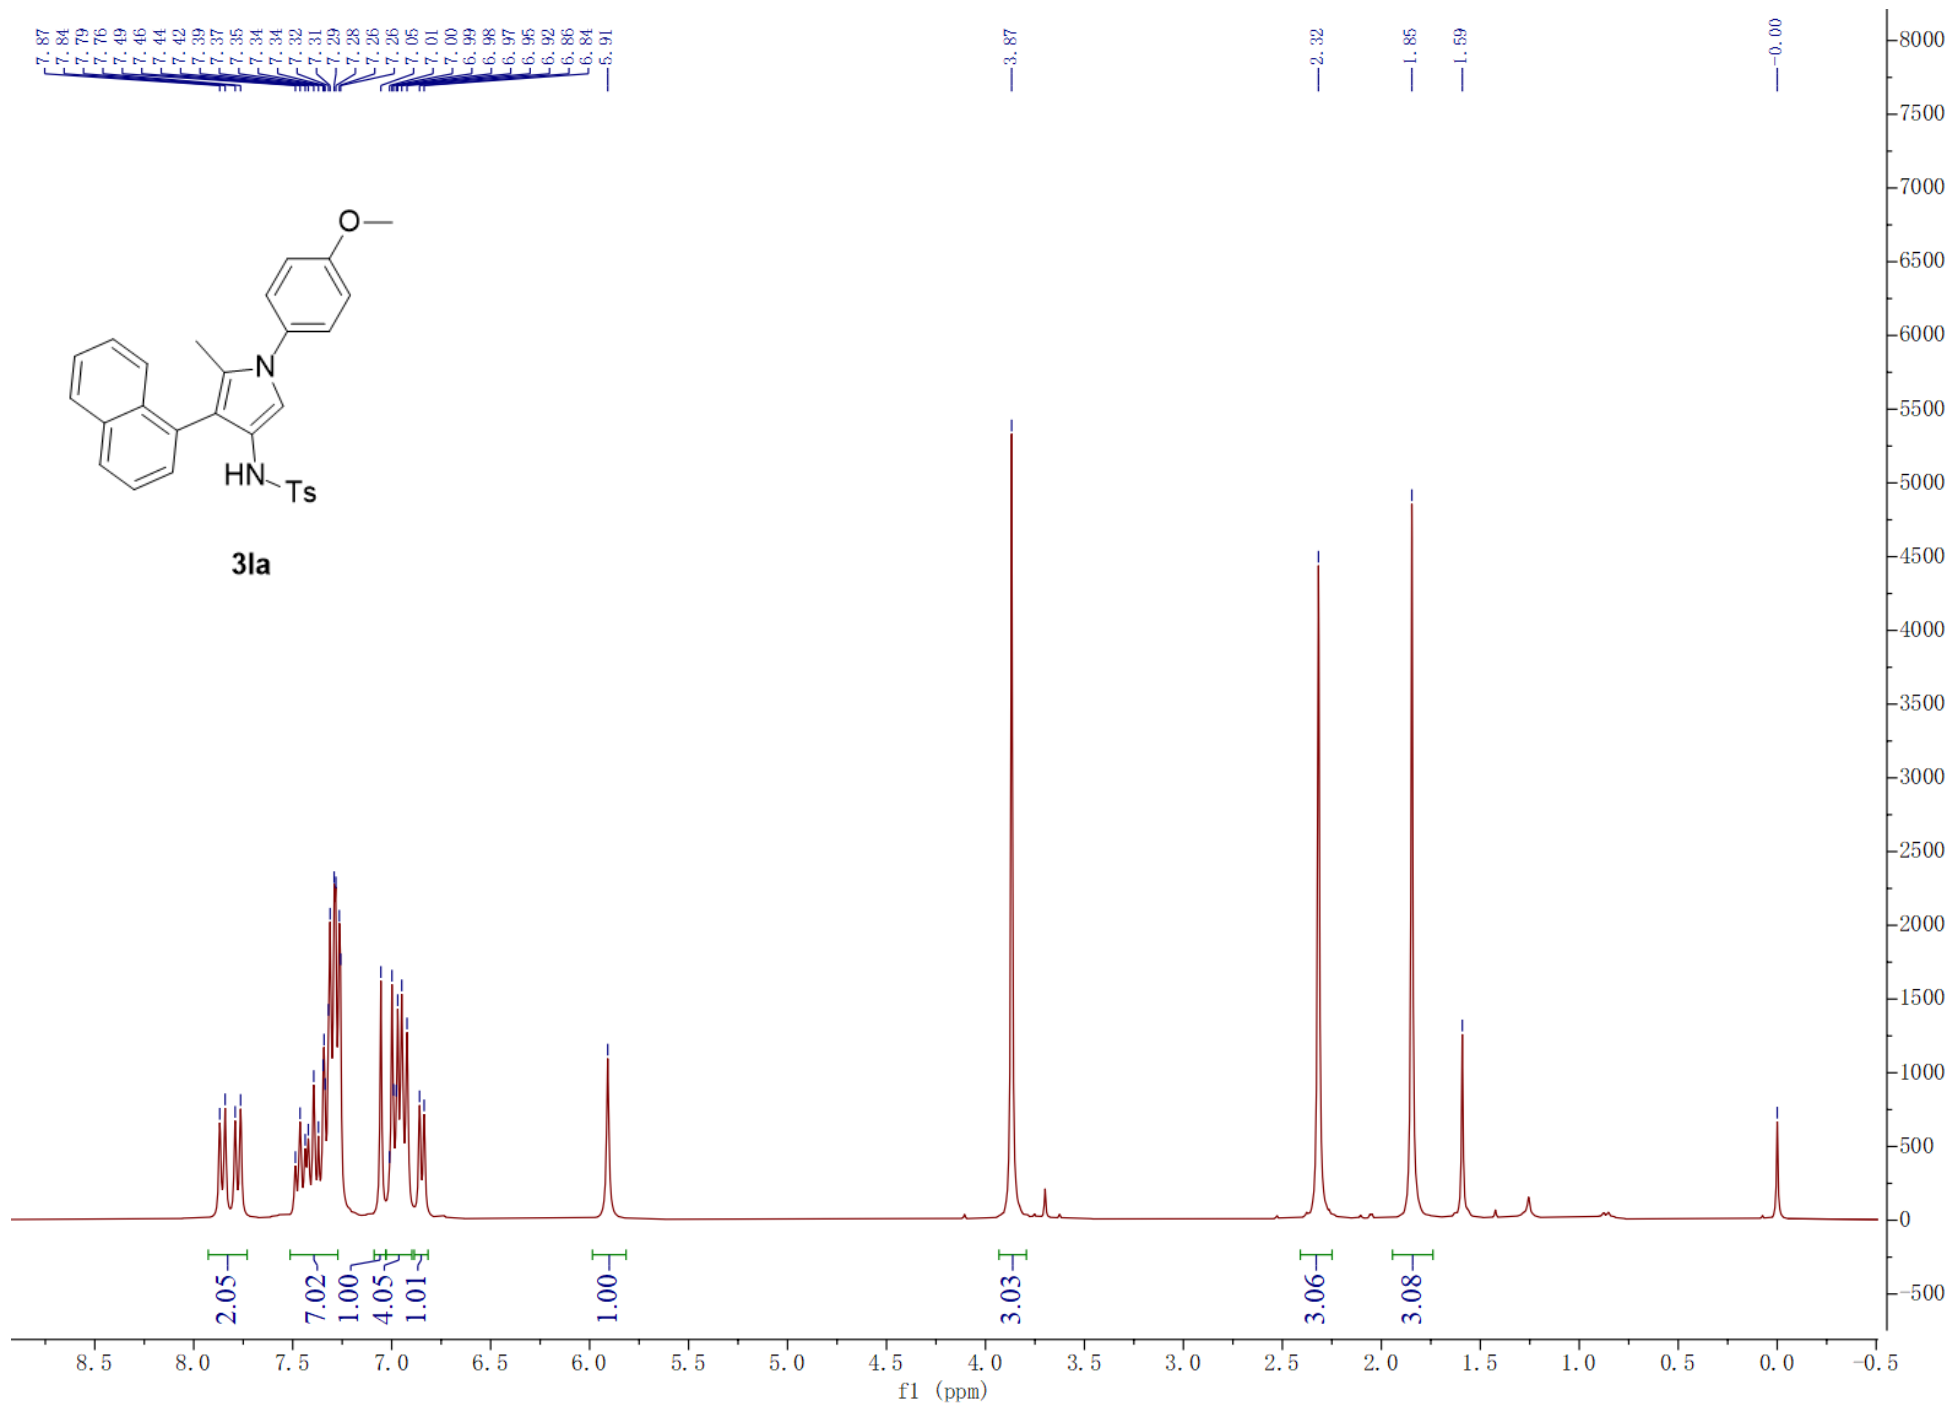

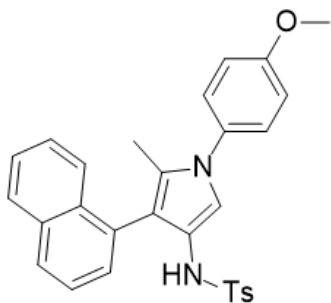

3la

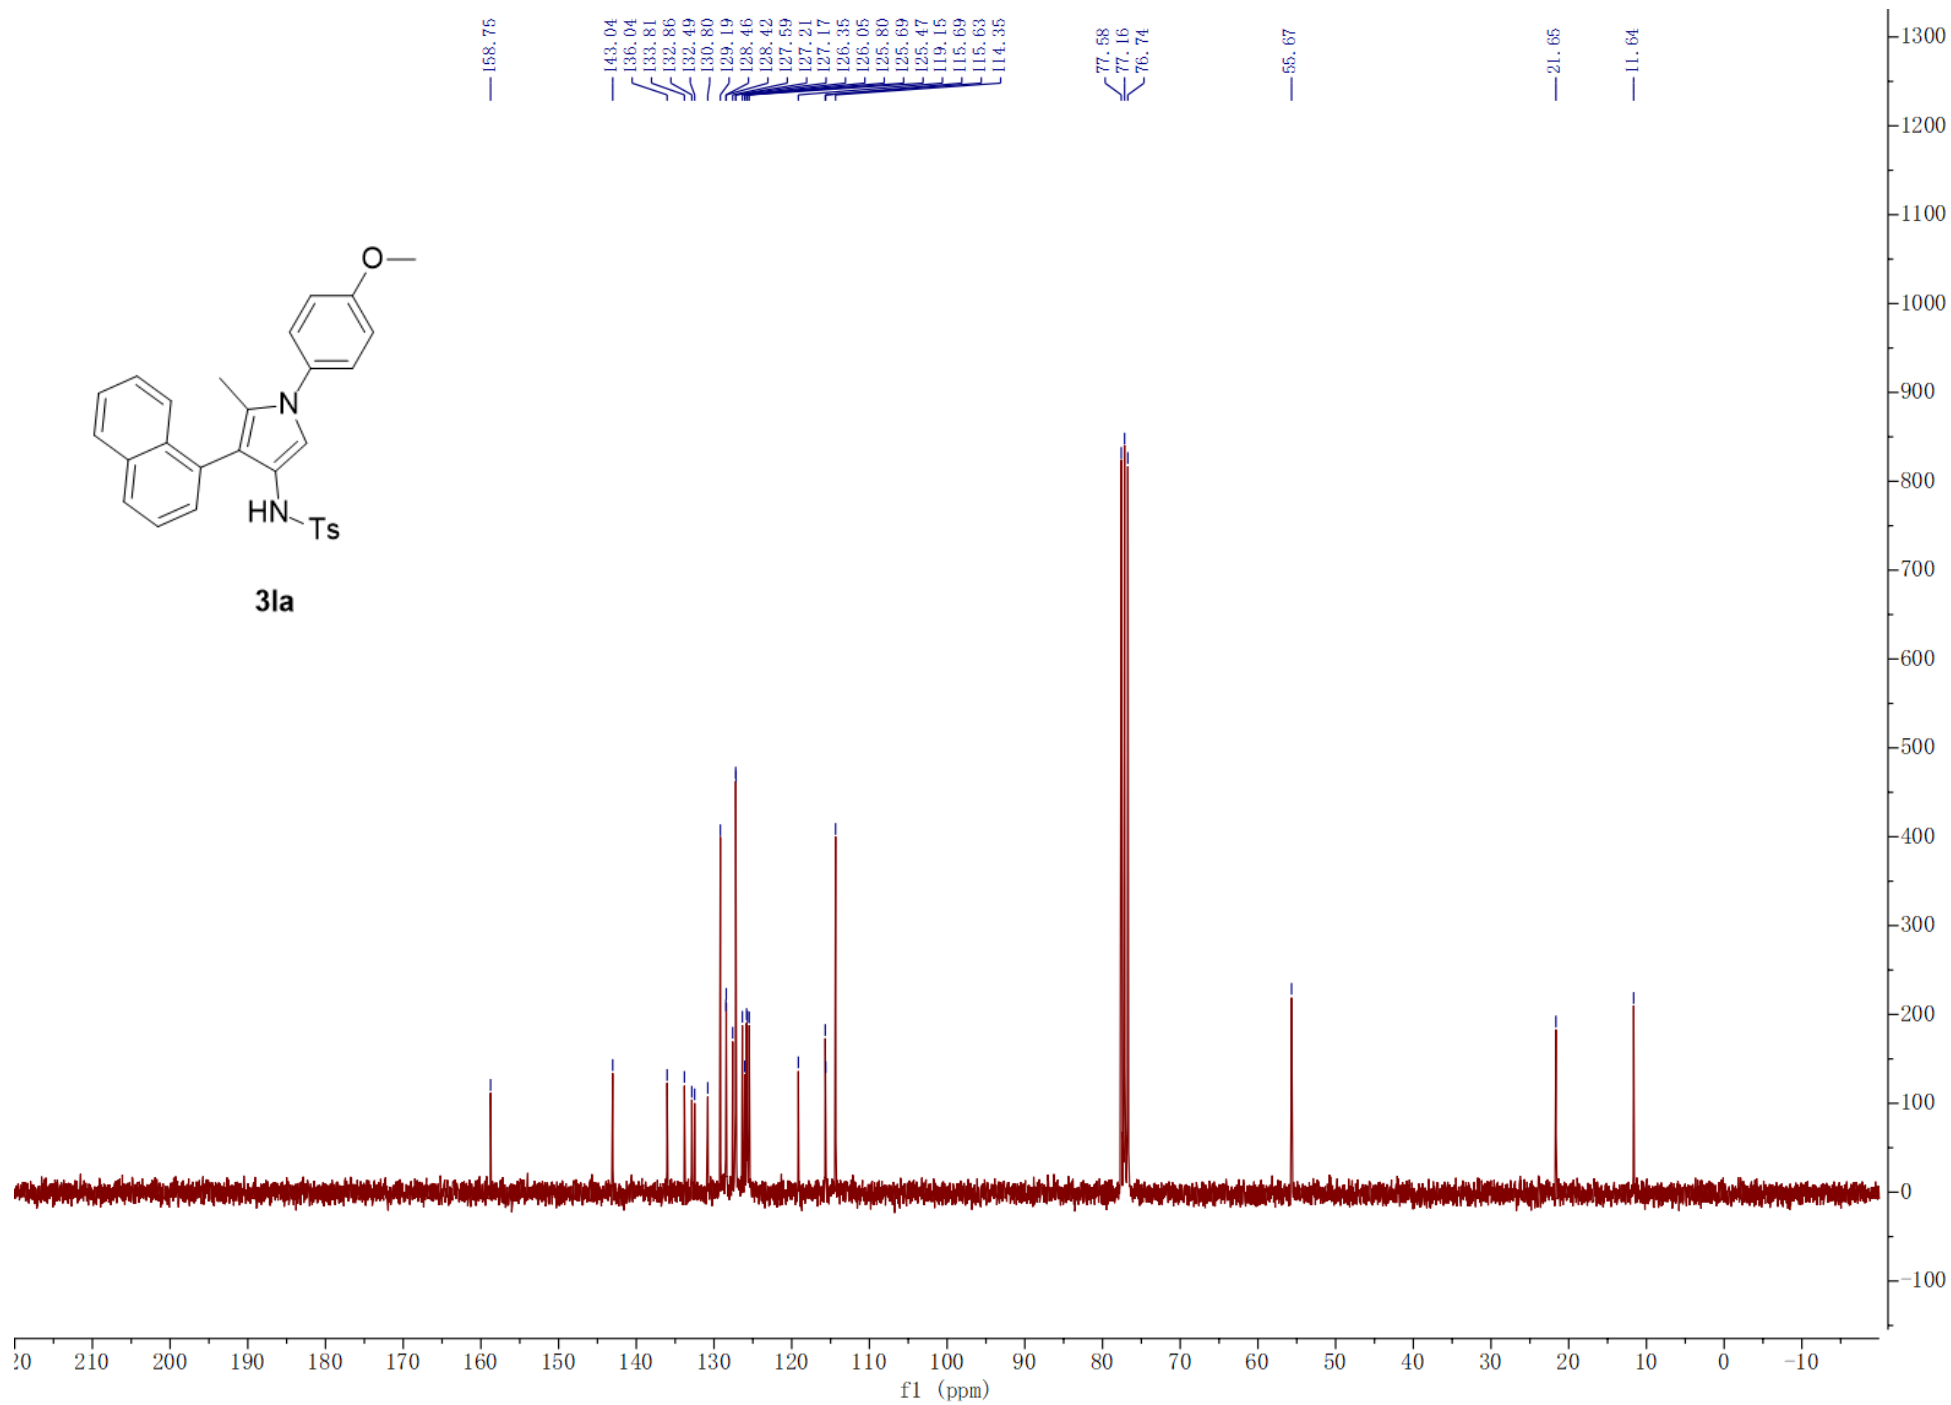

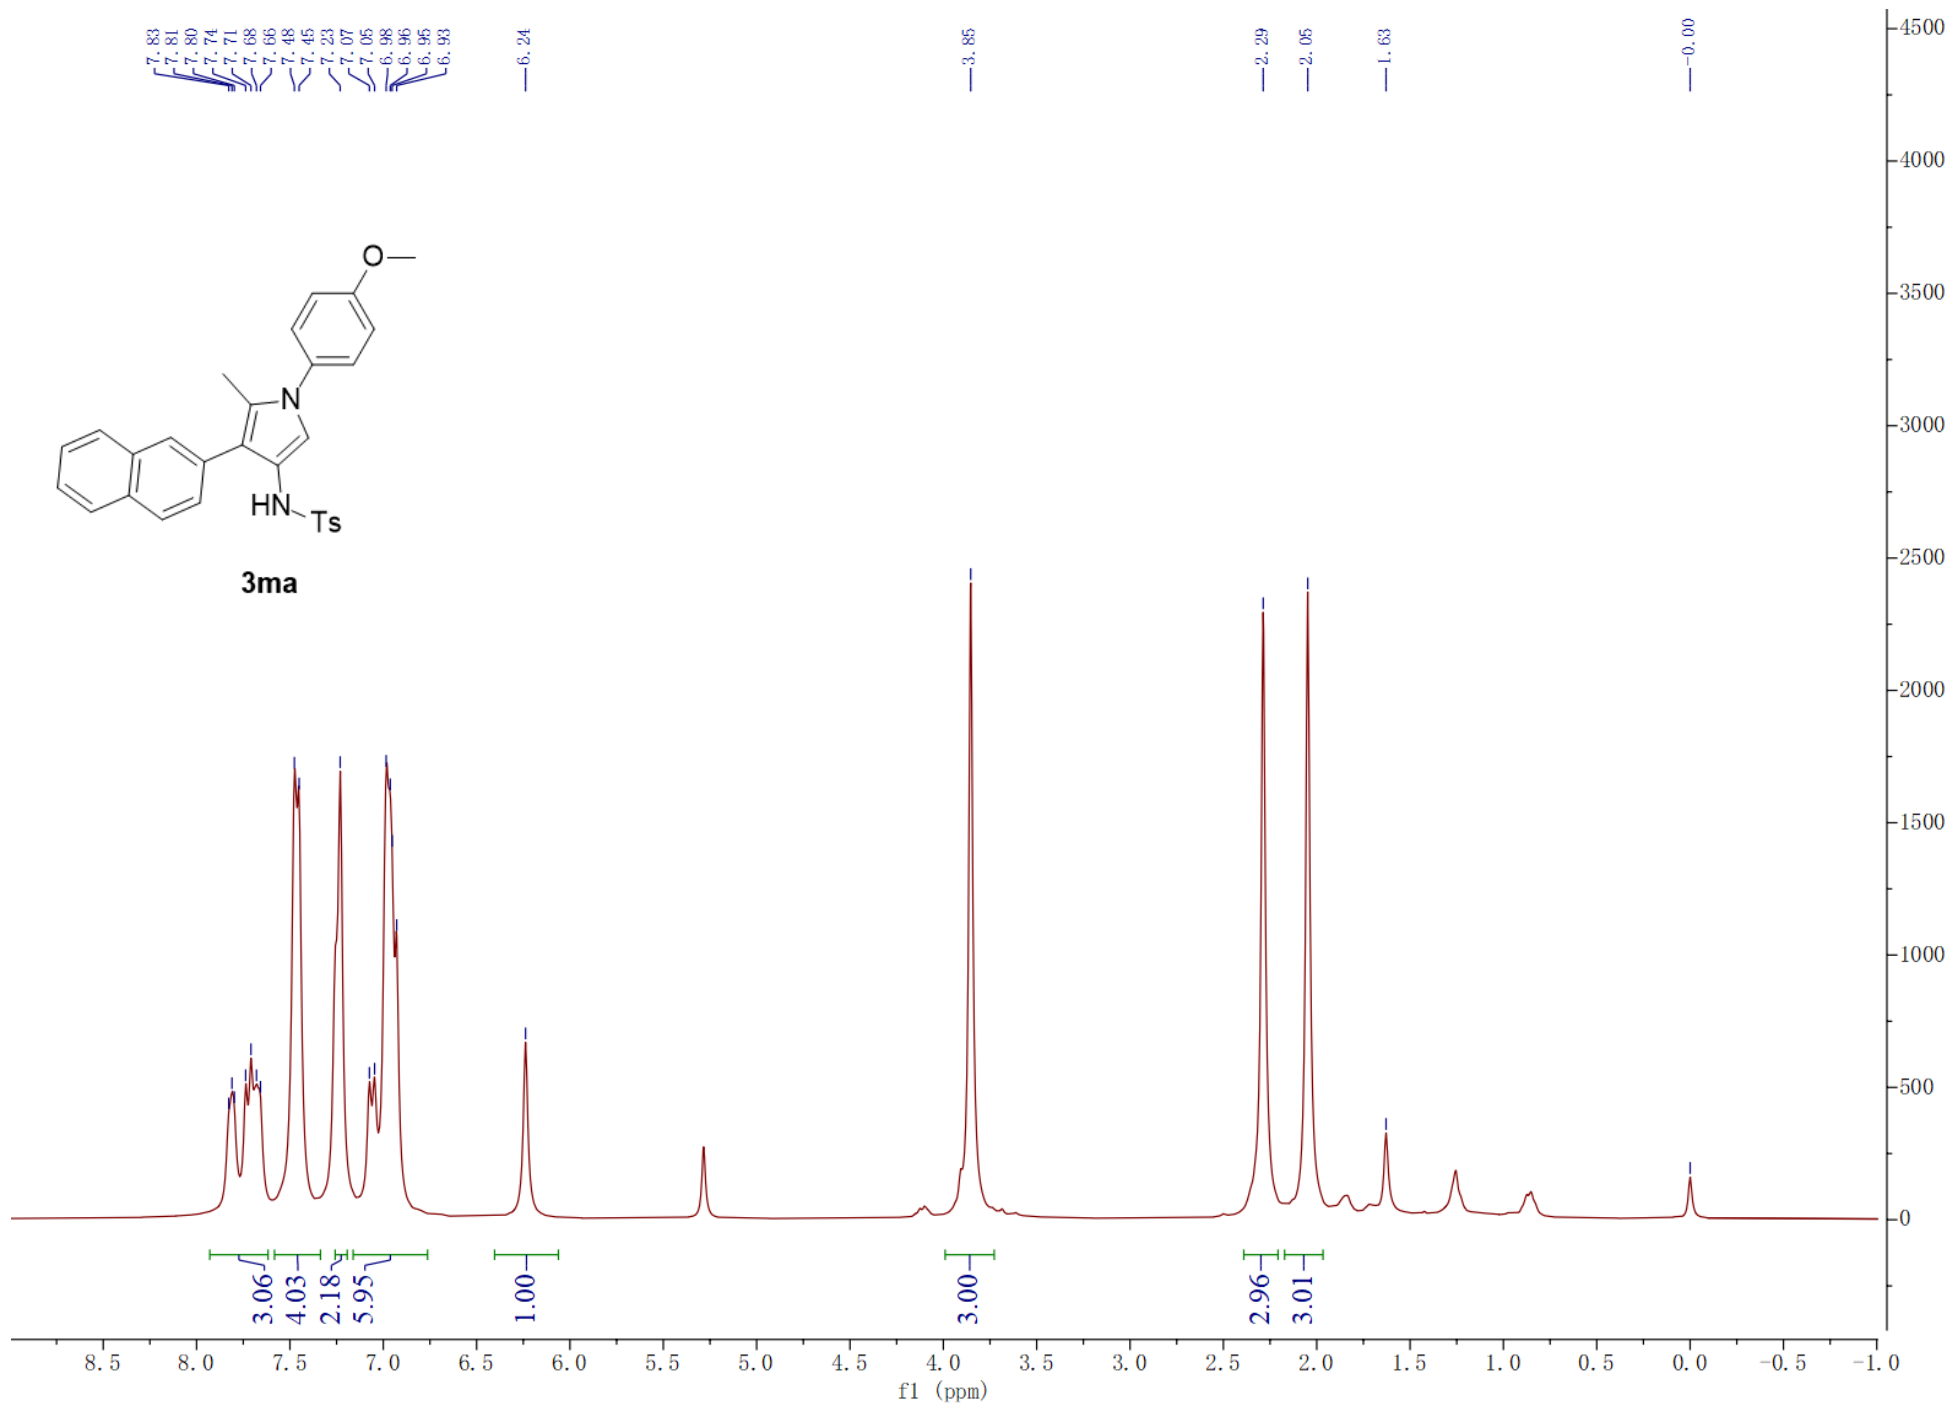

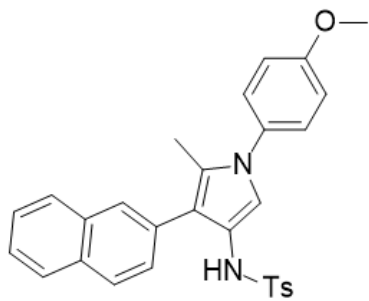

3ma

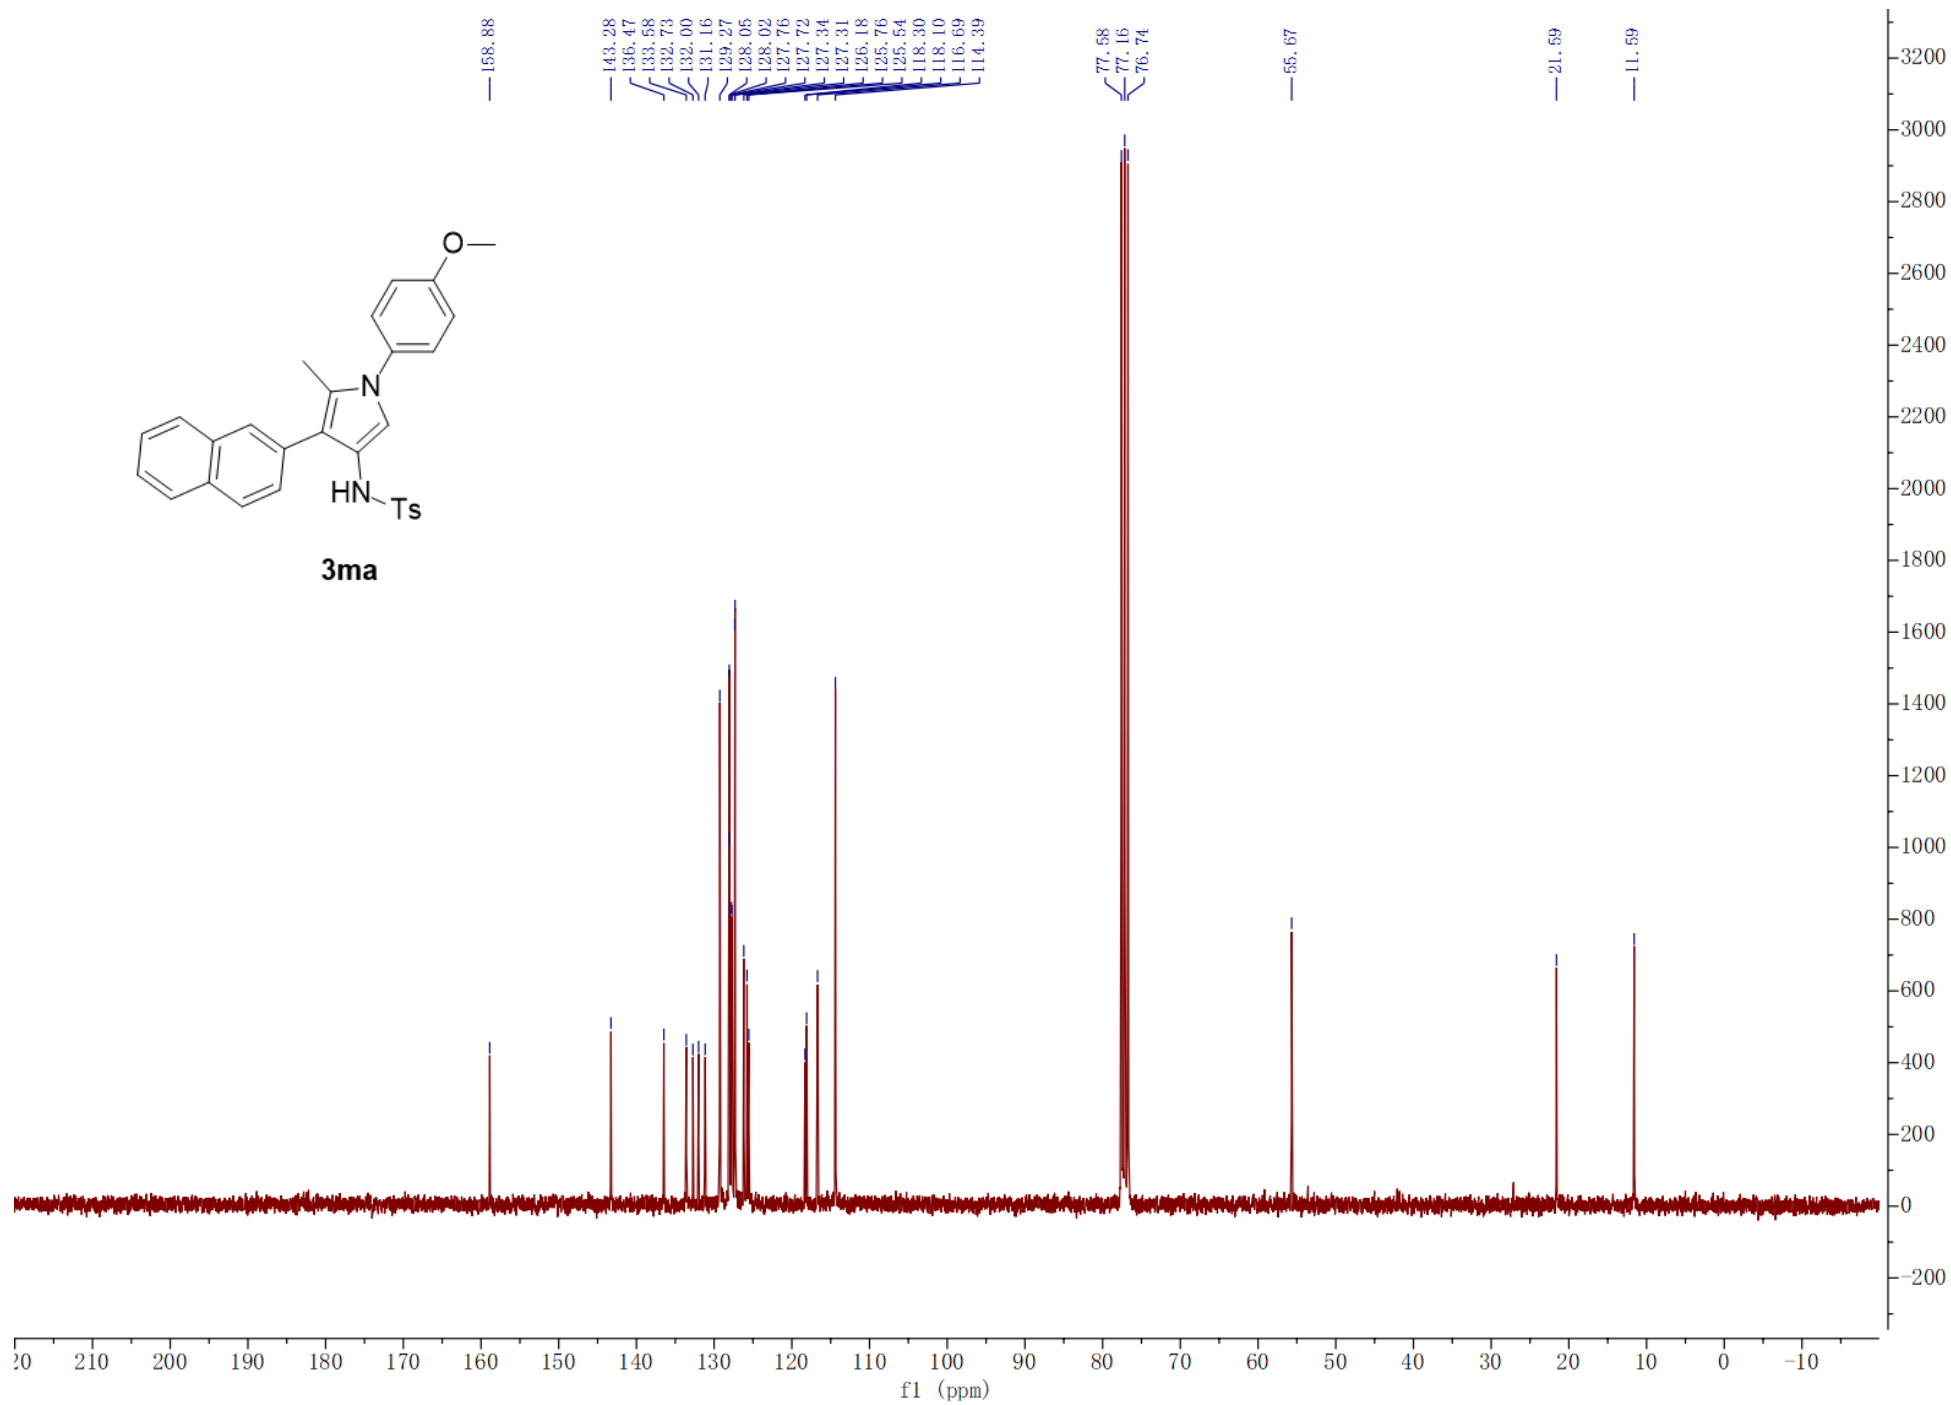



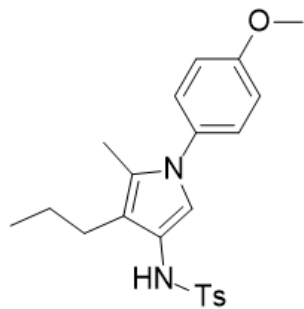

**3na**

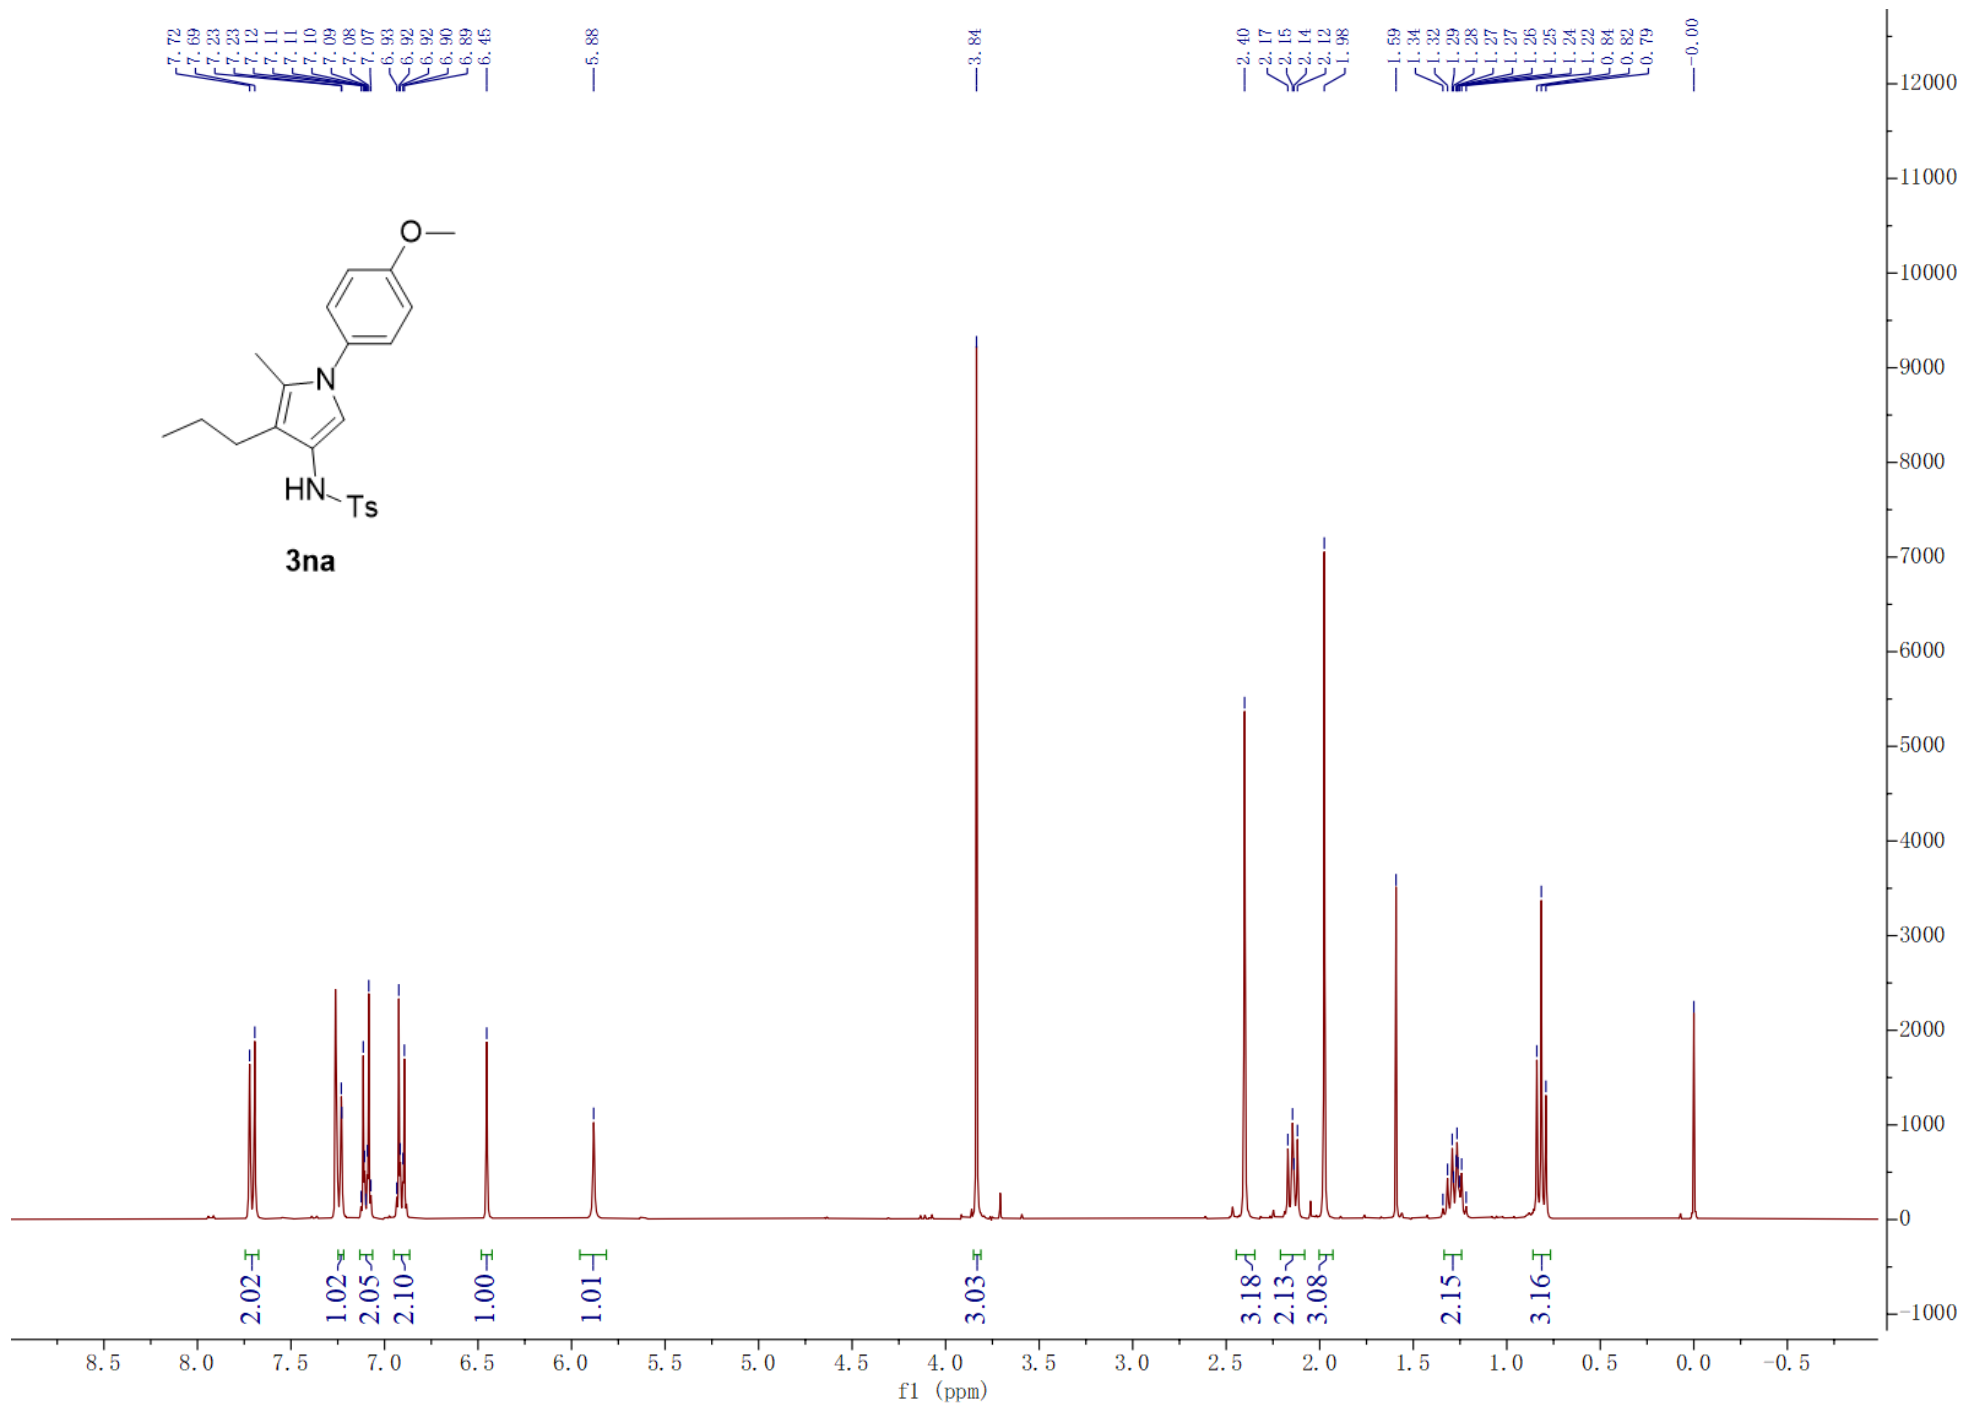

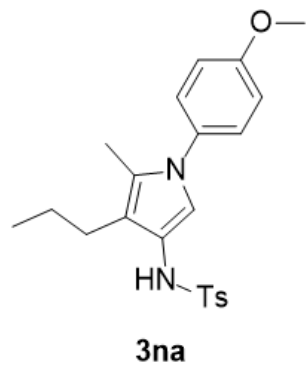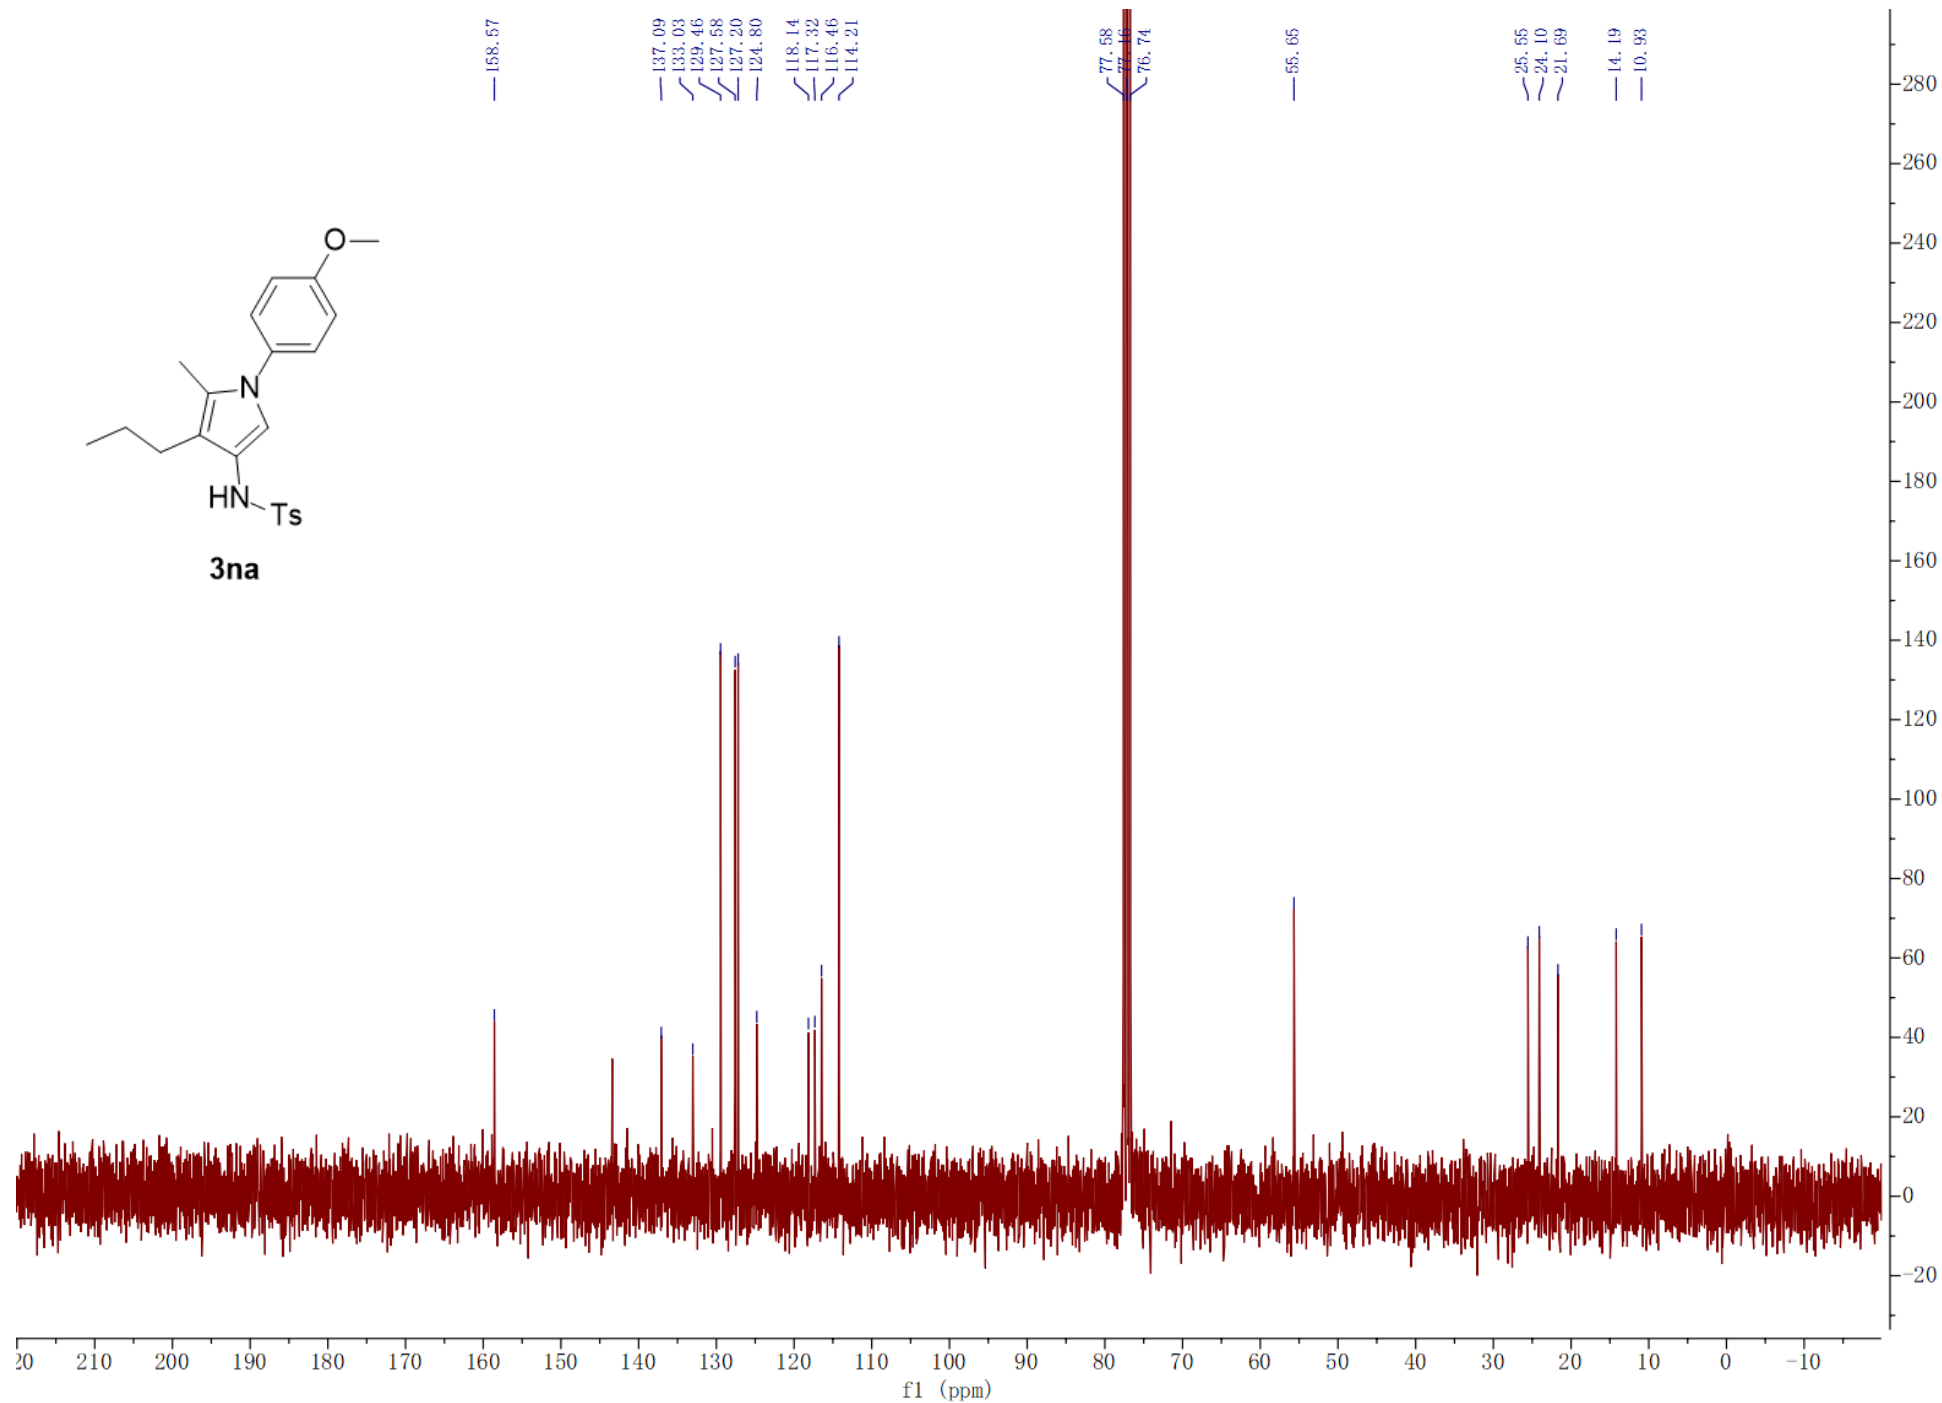

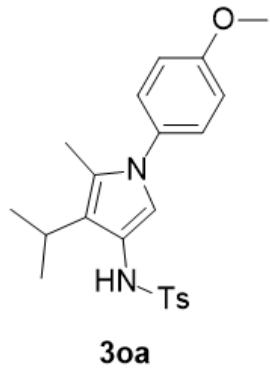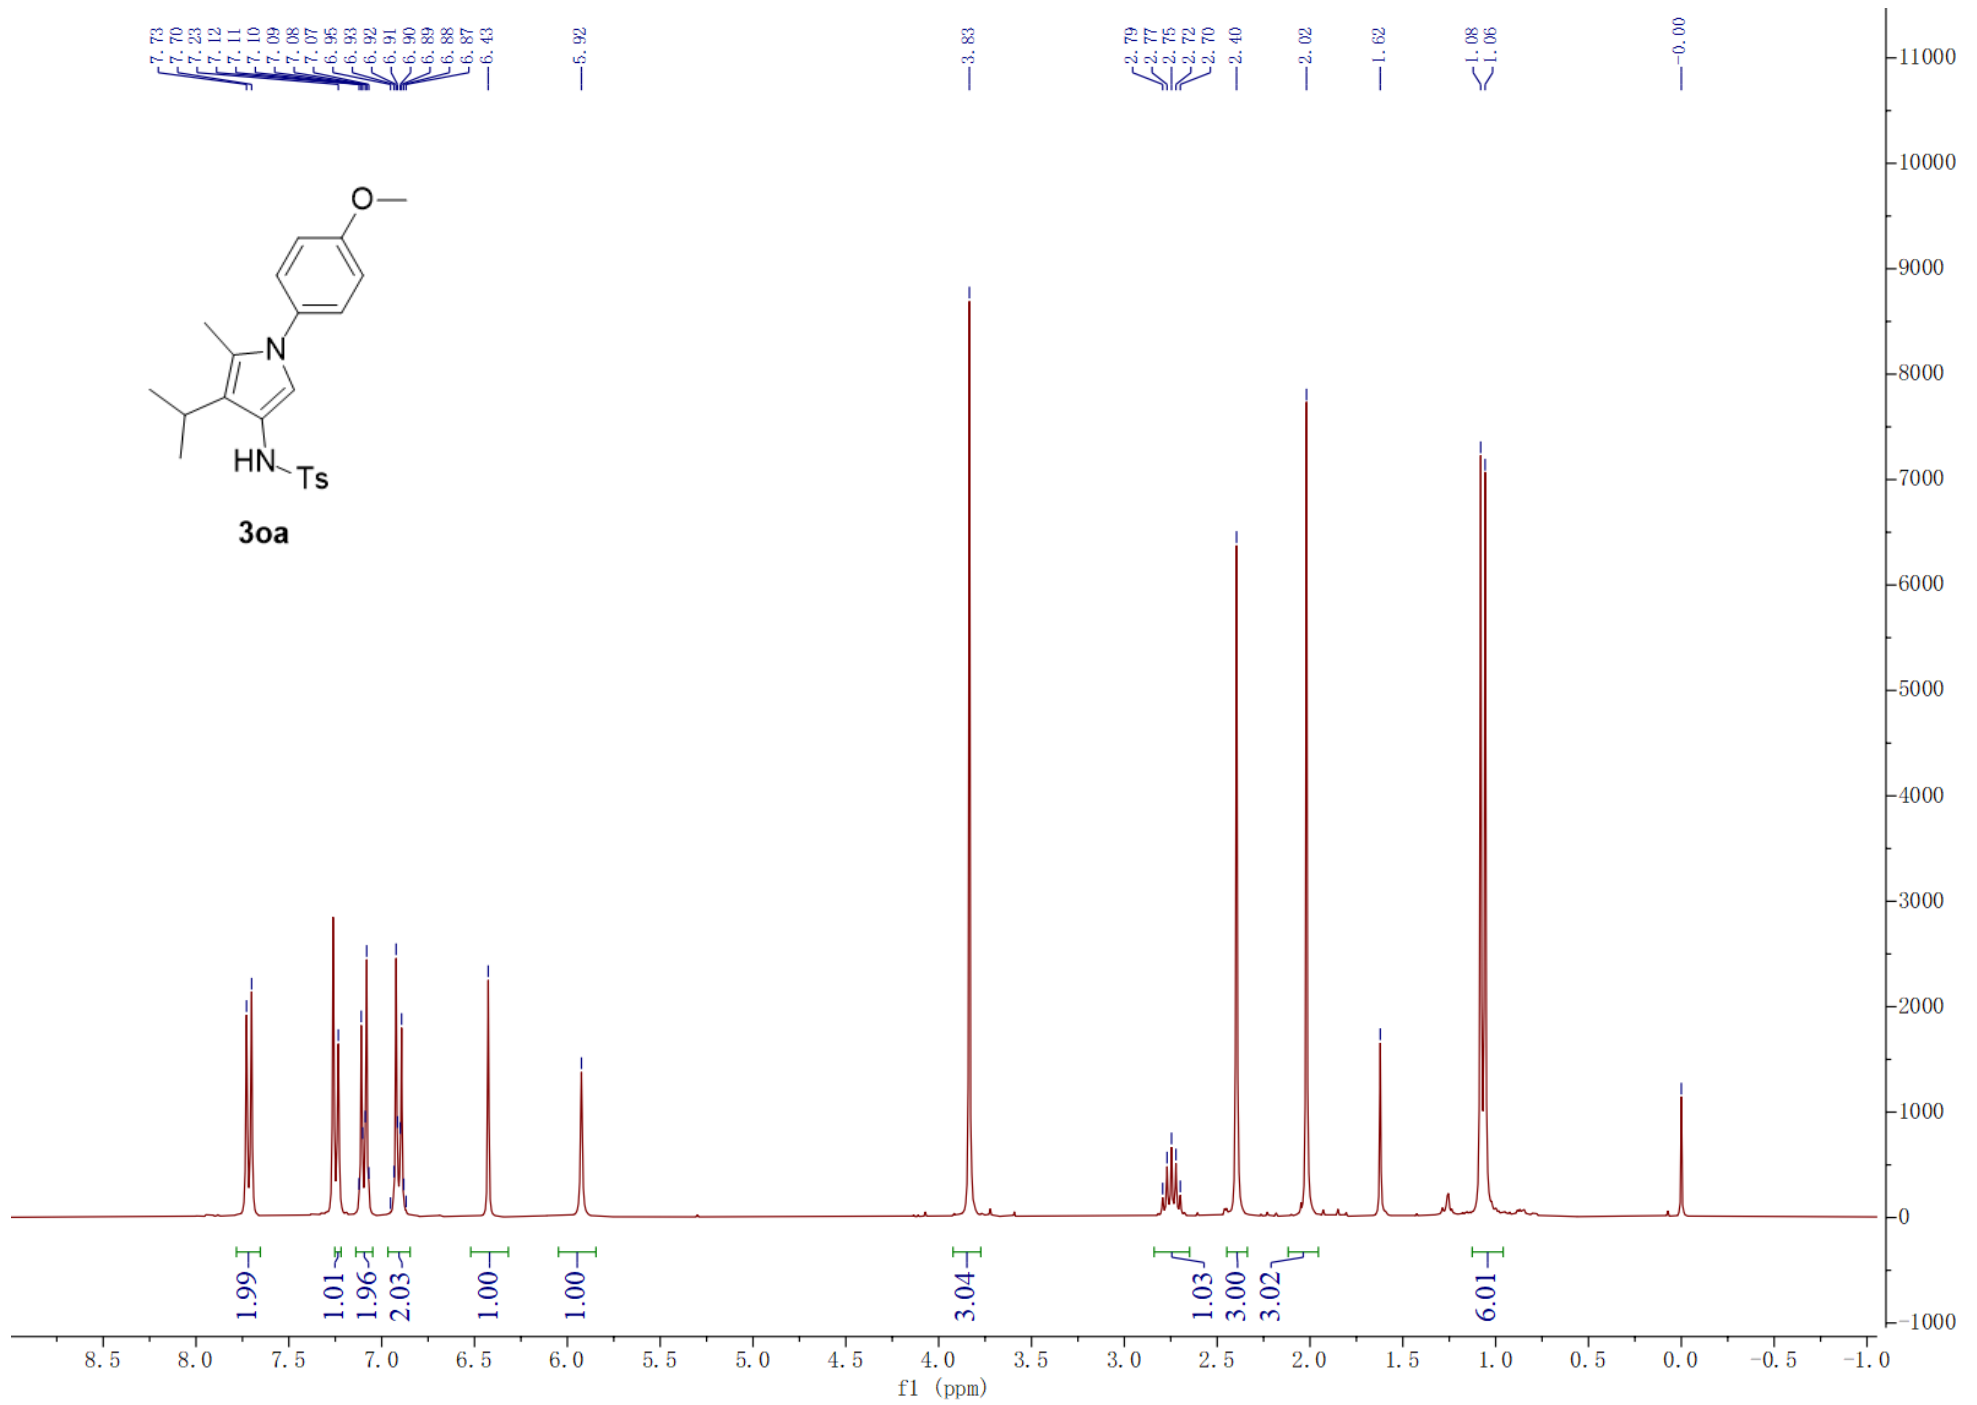

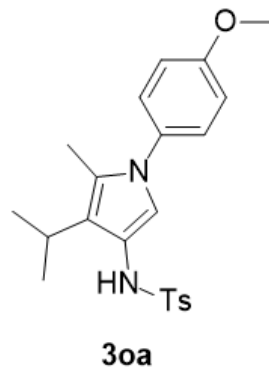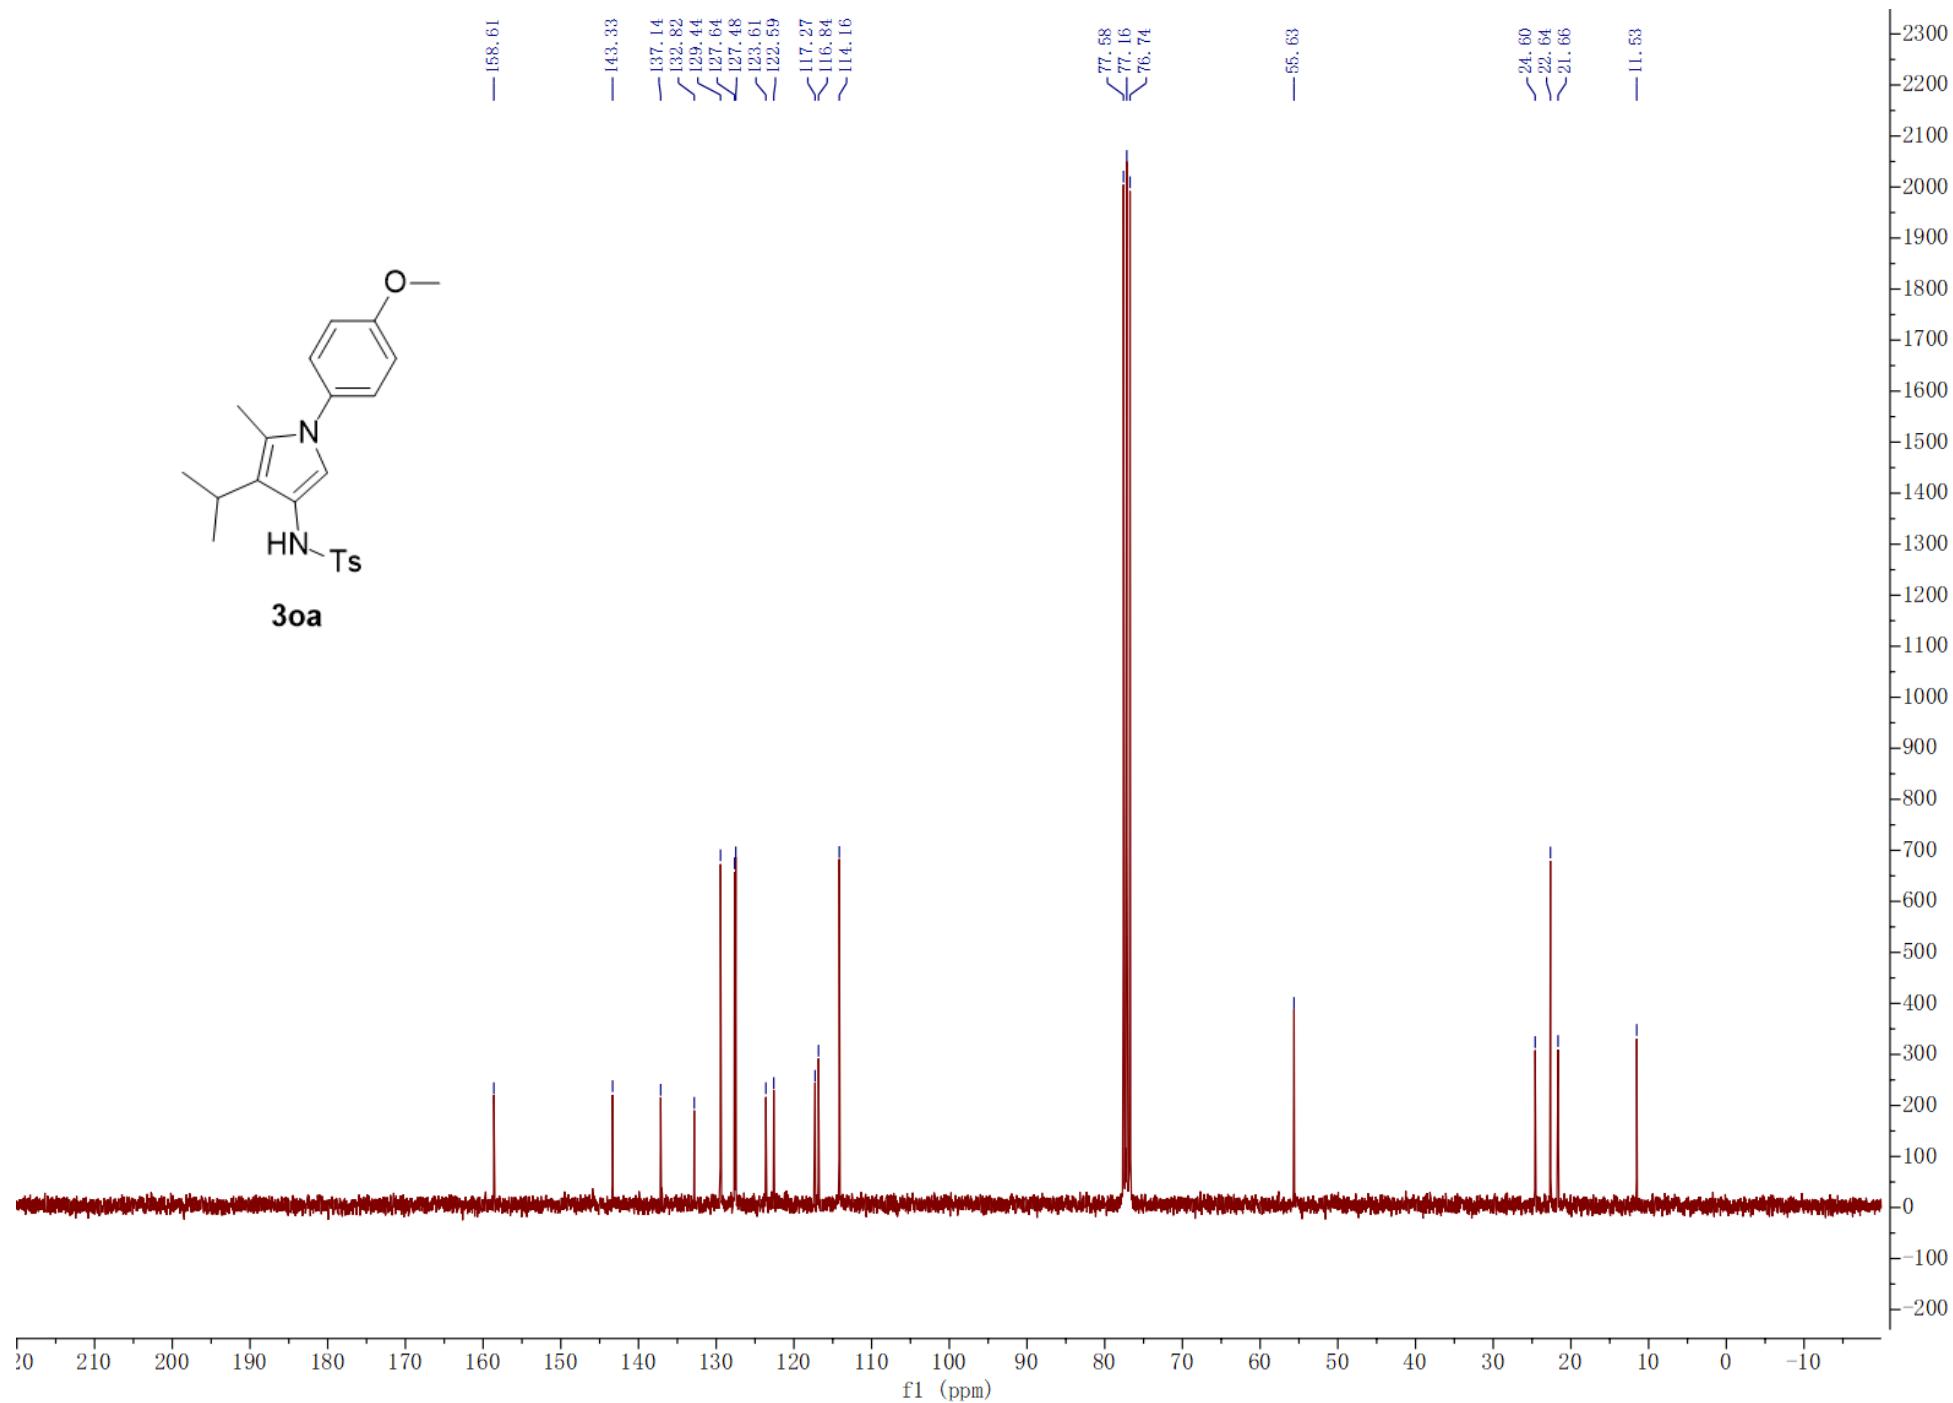

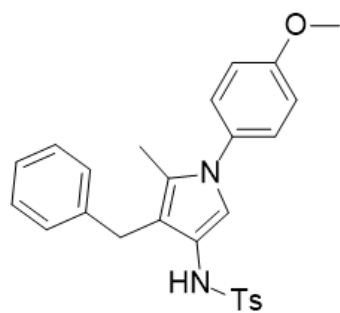

3pa

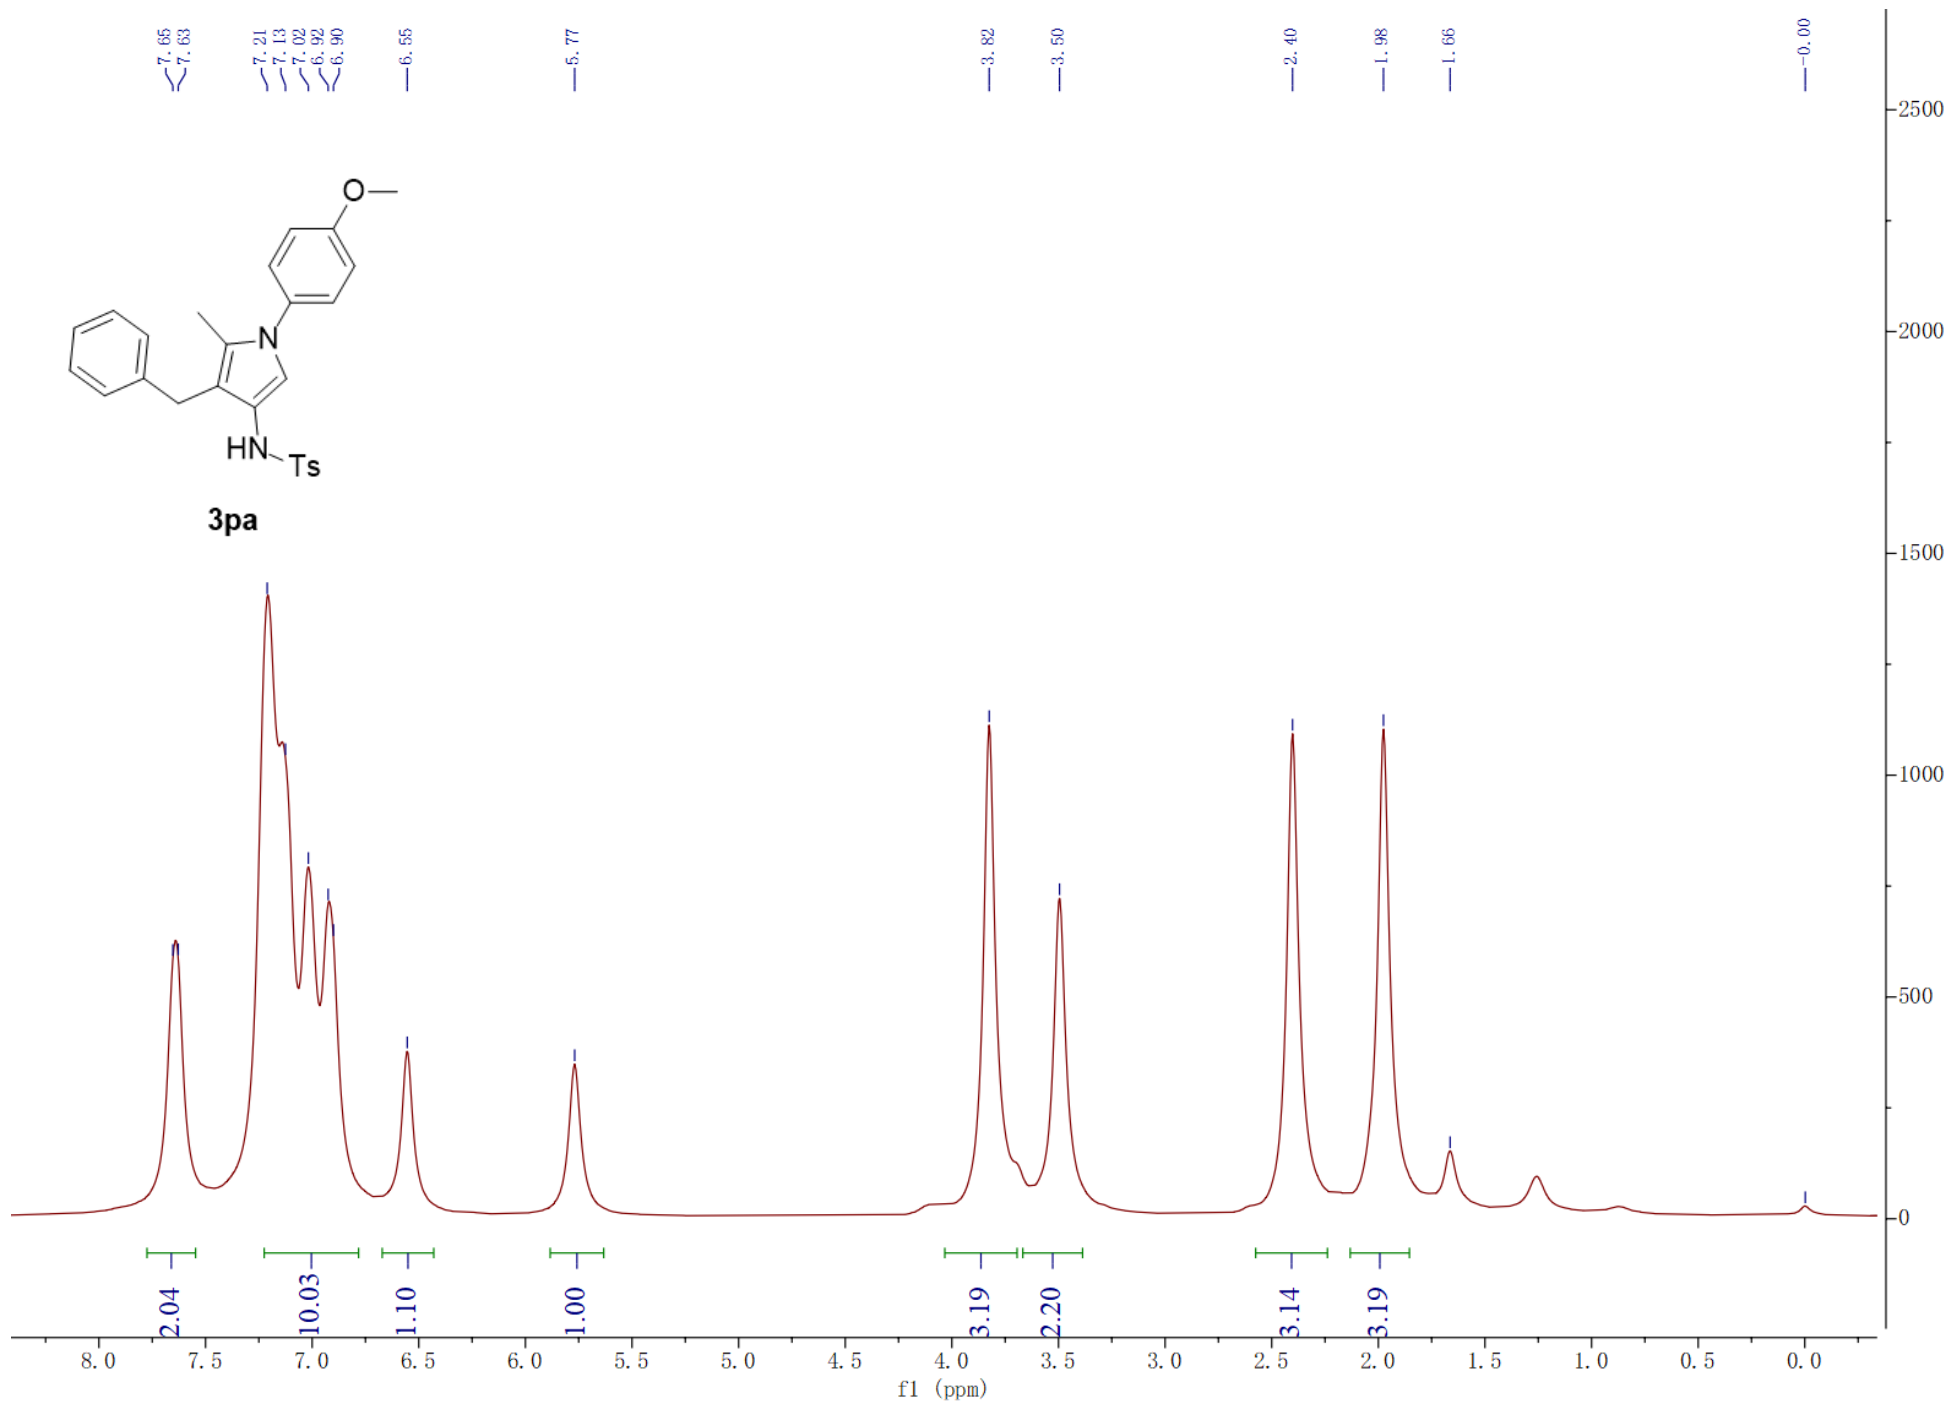

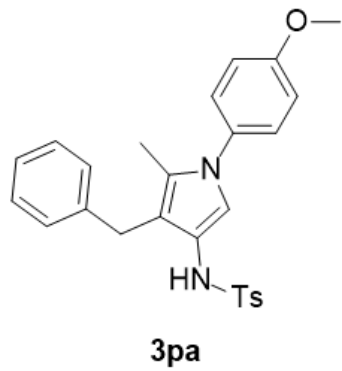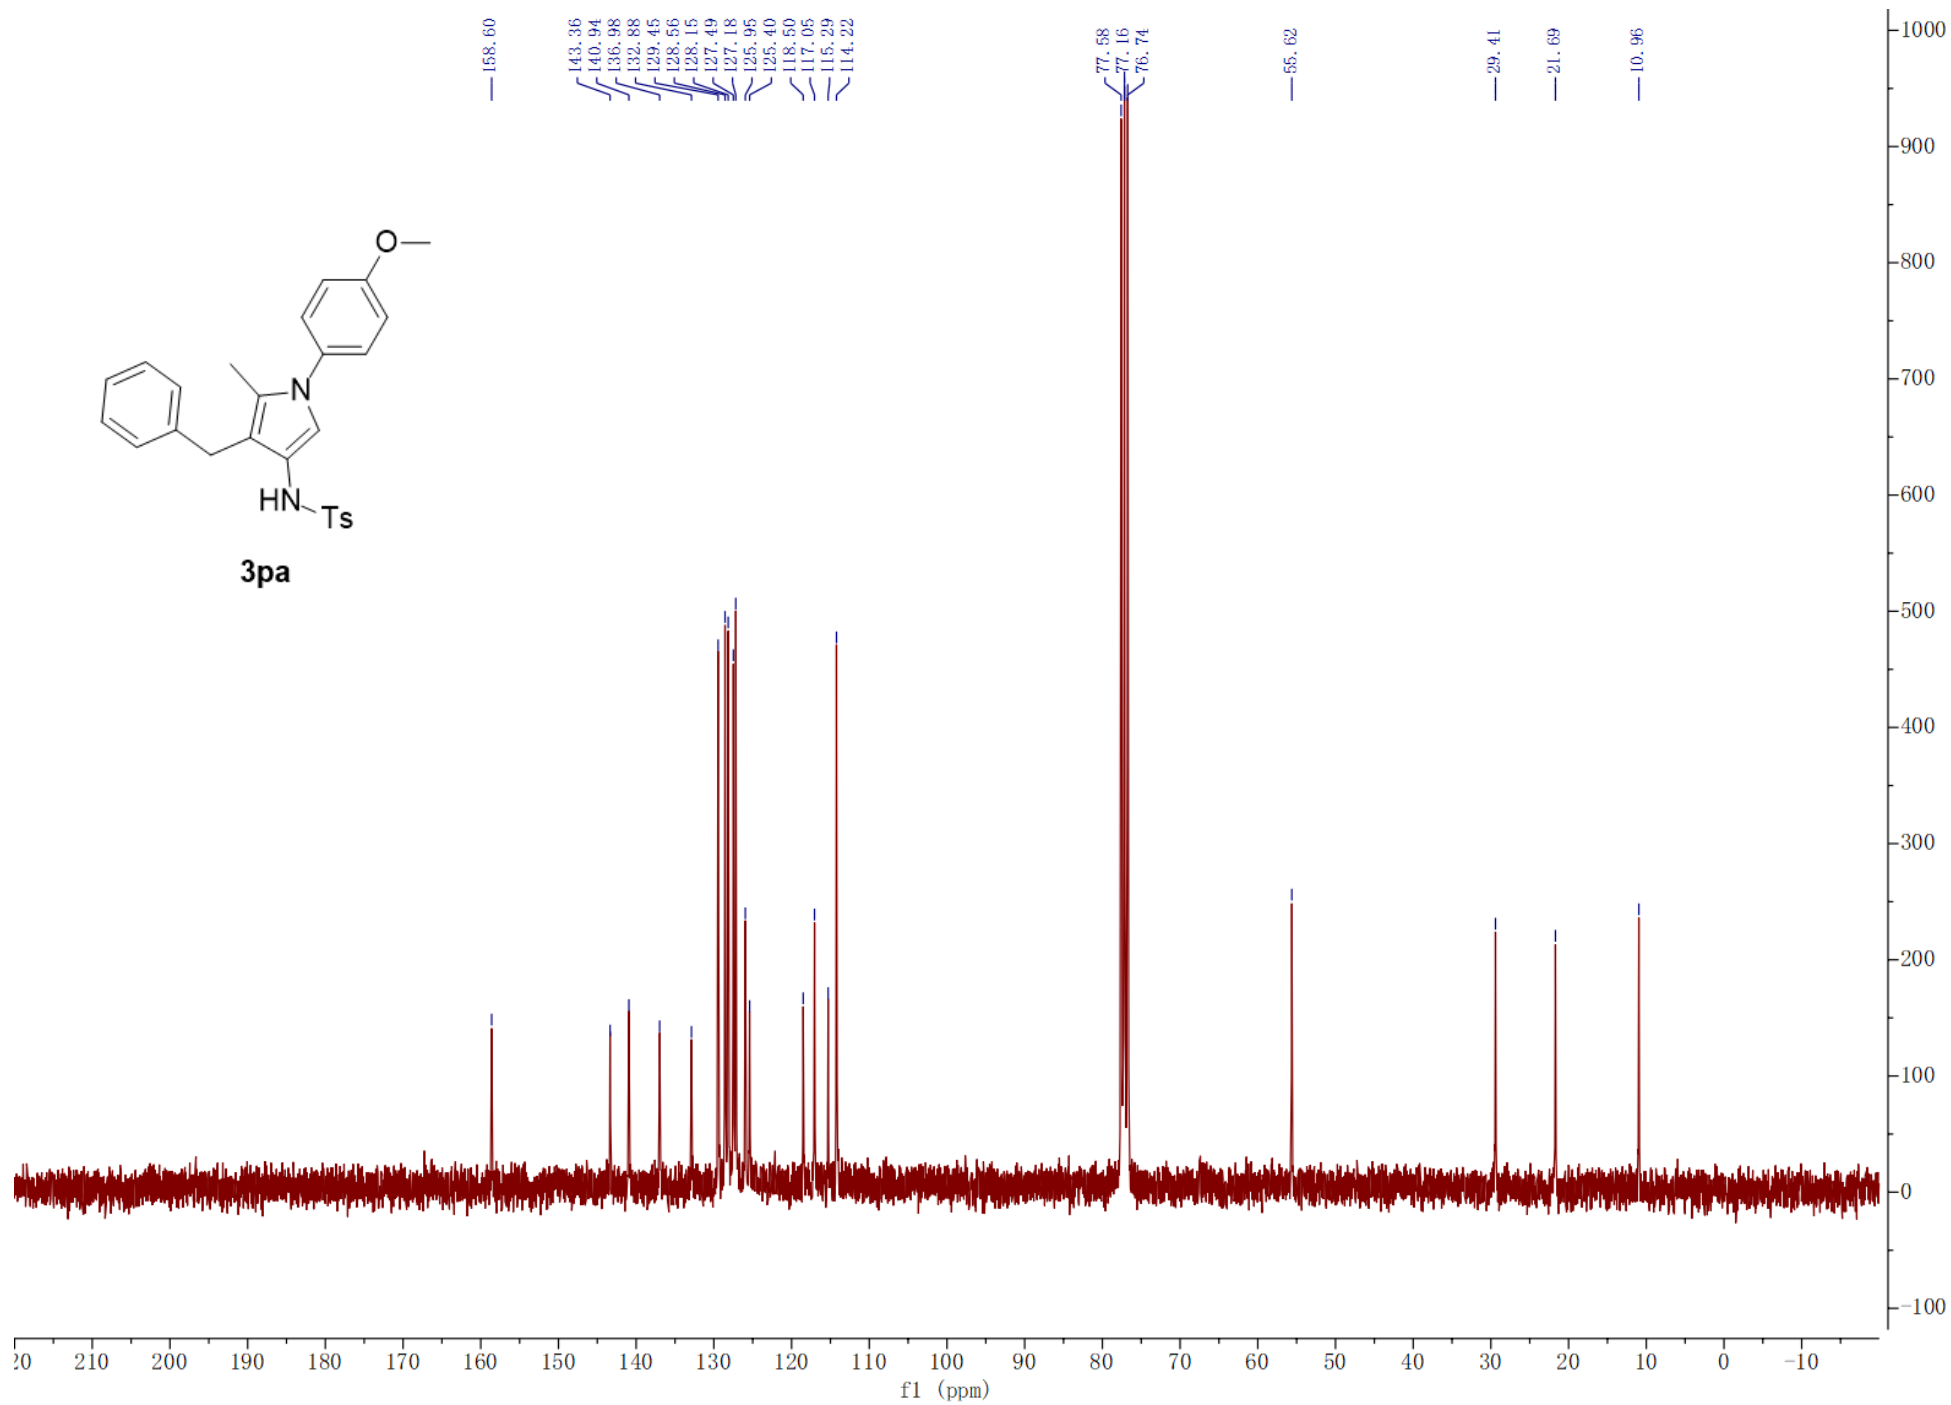

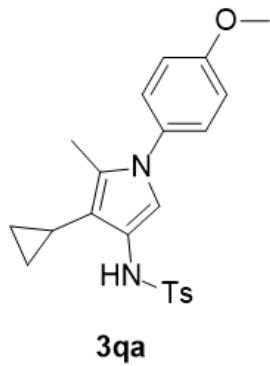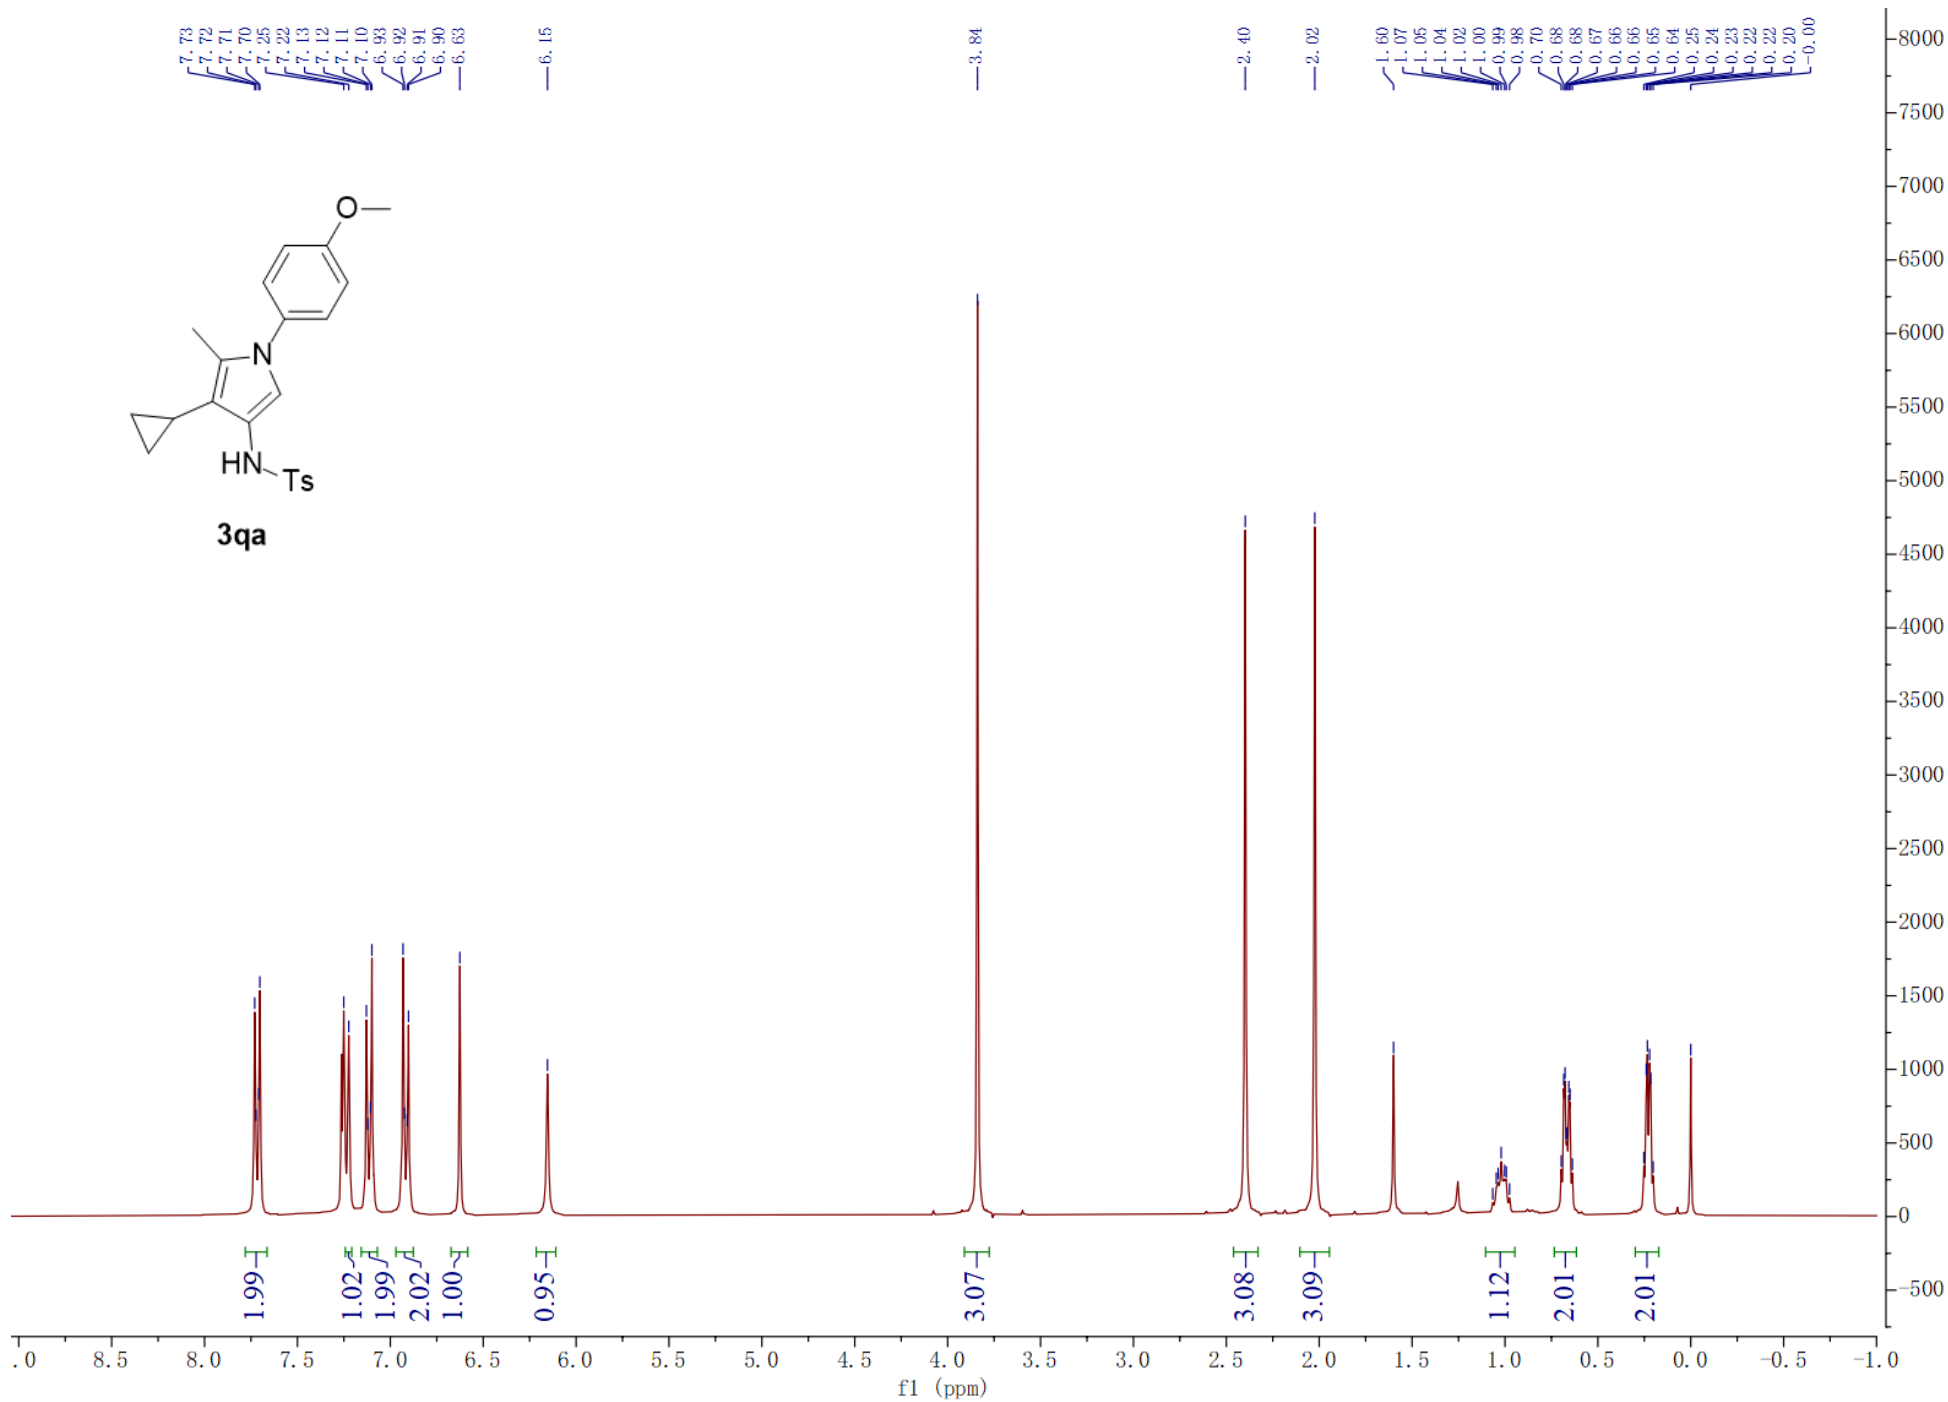

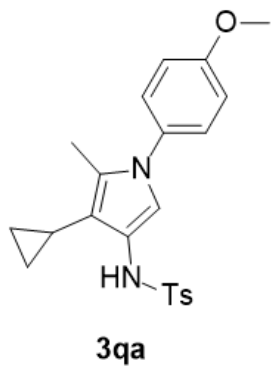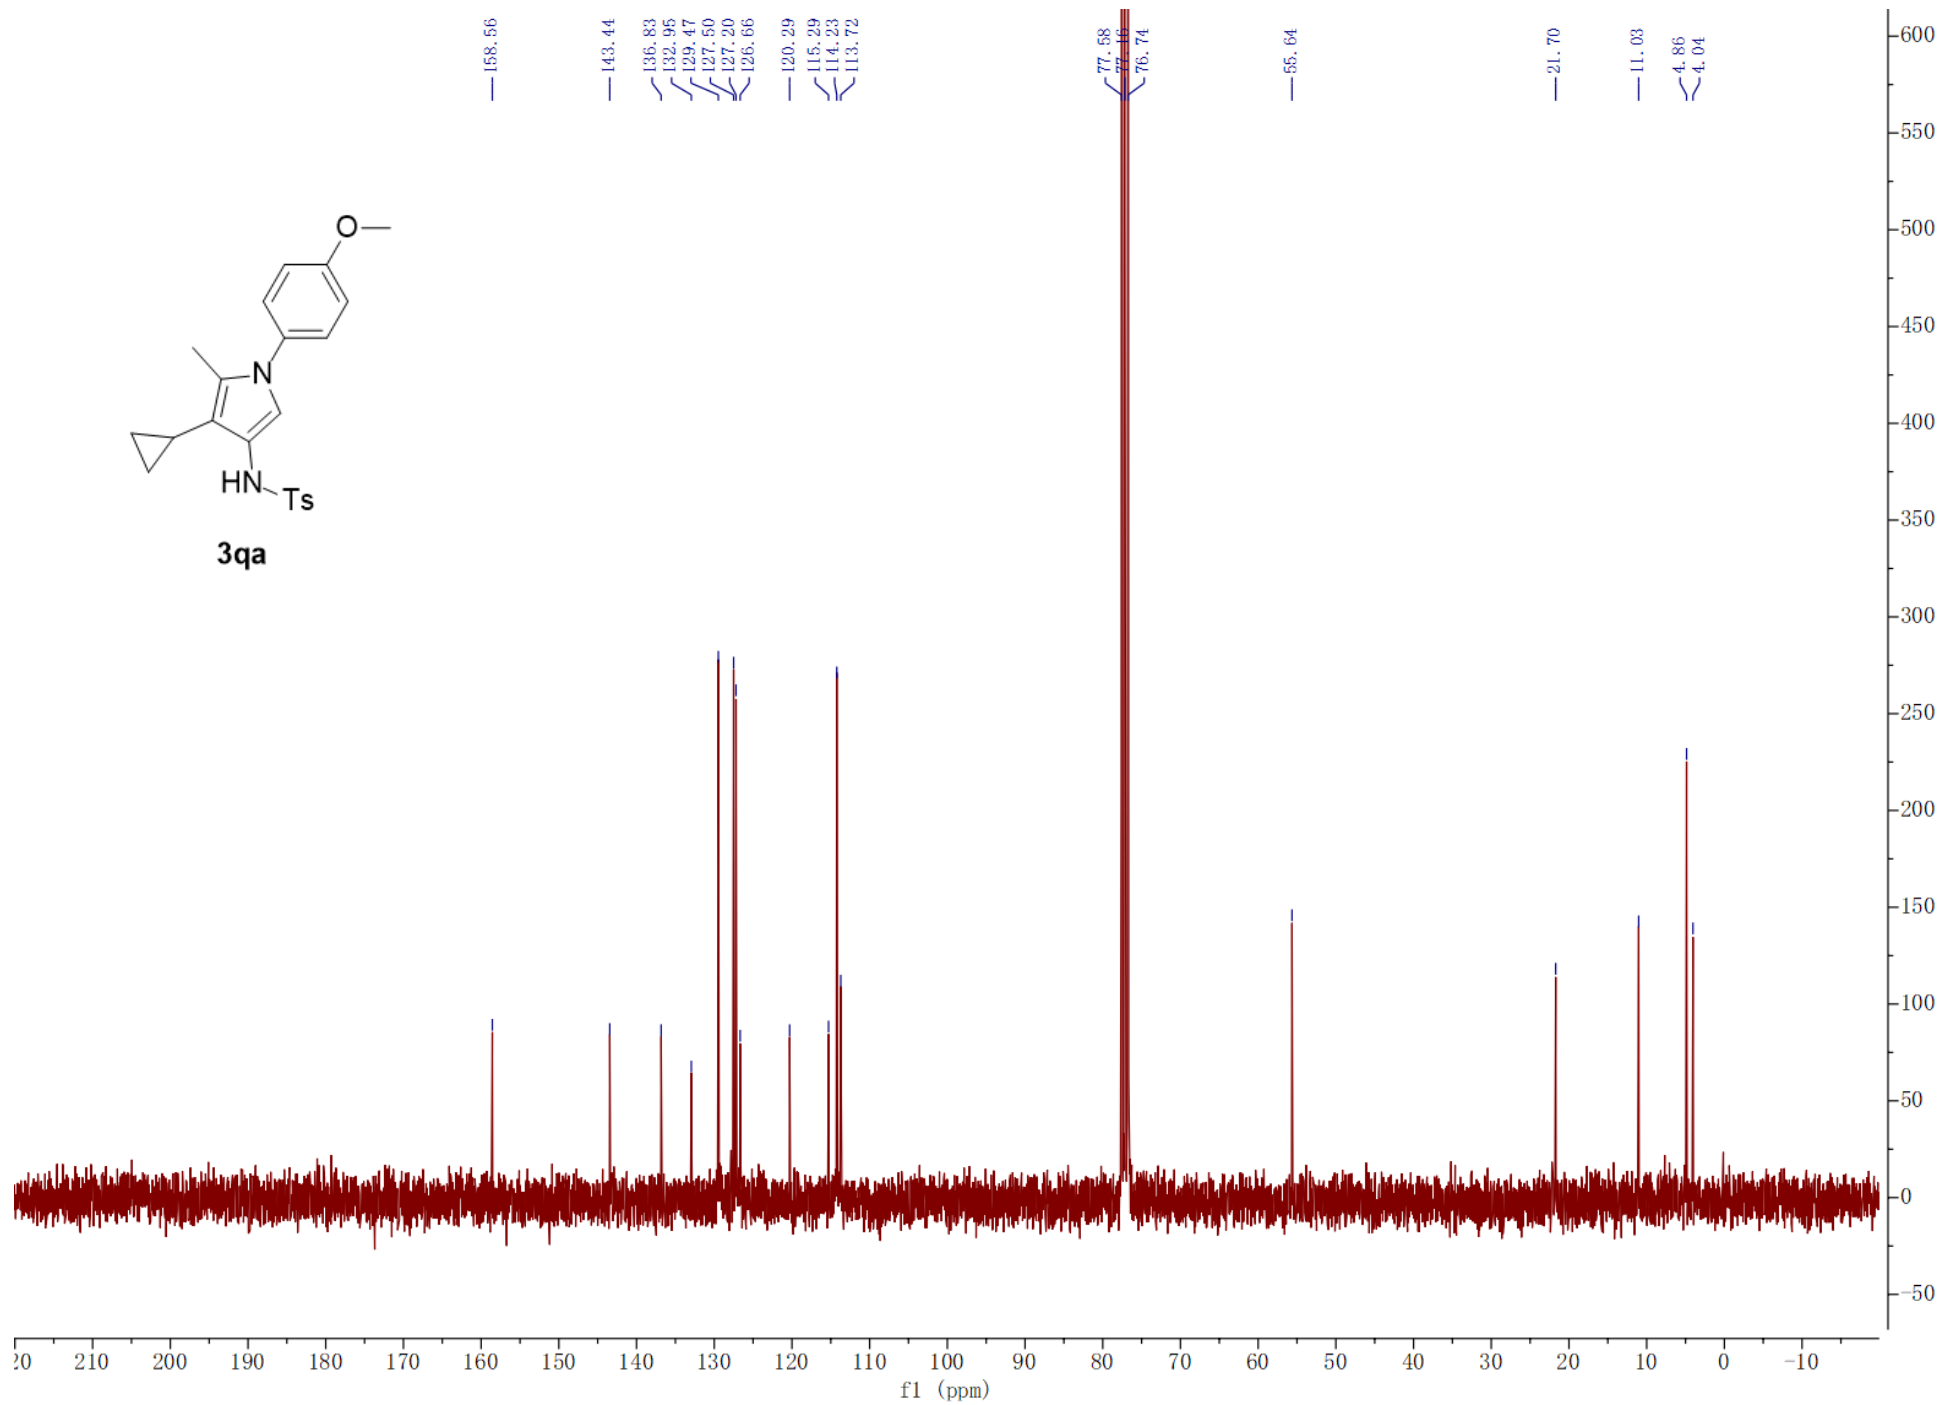



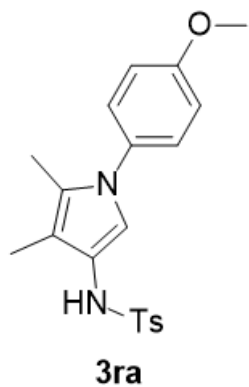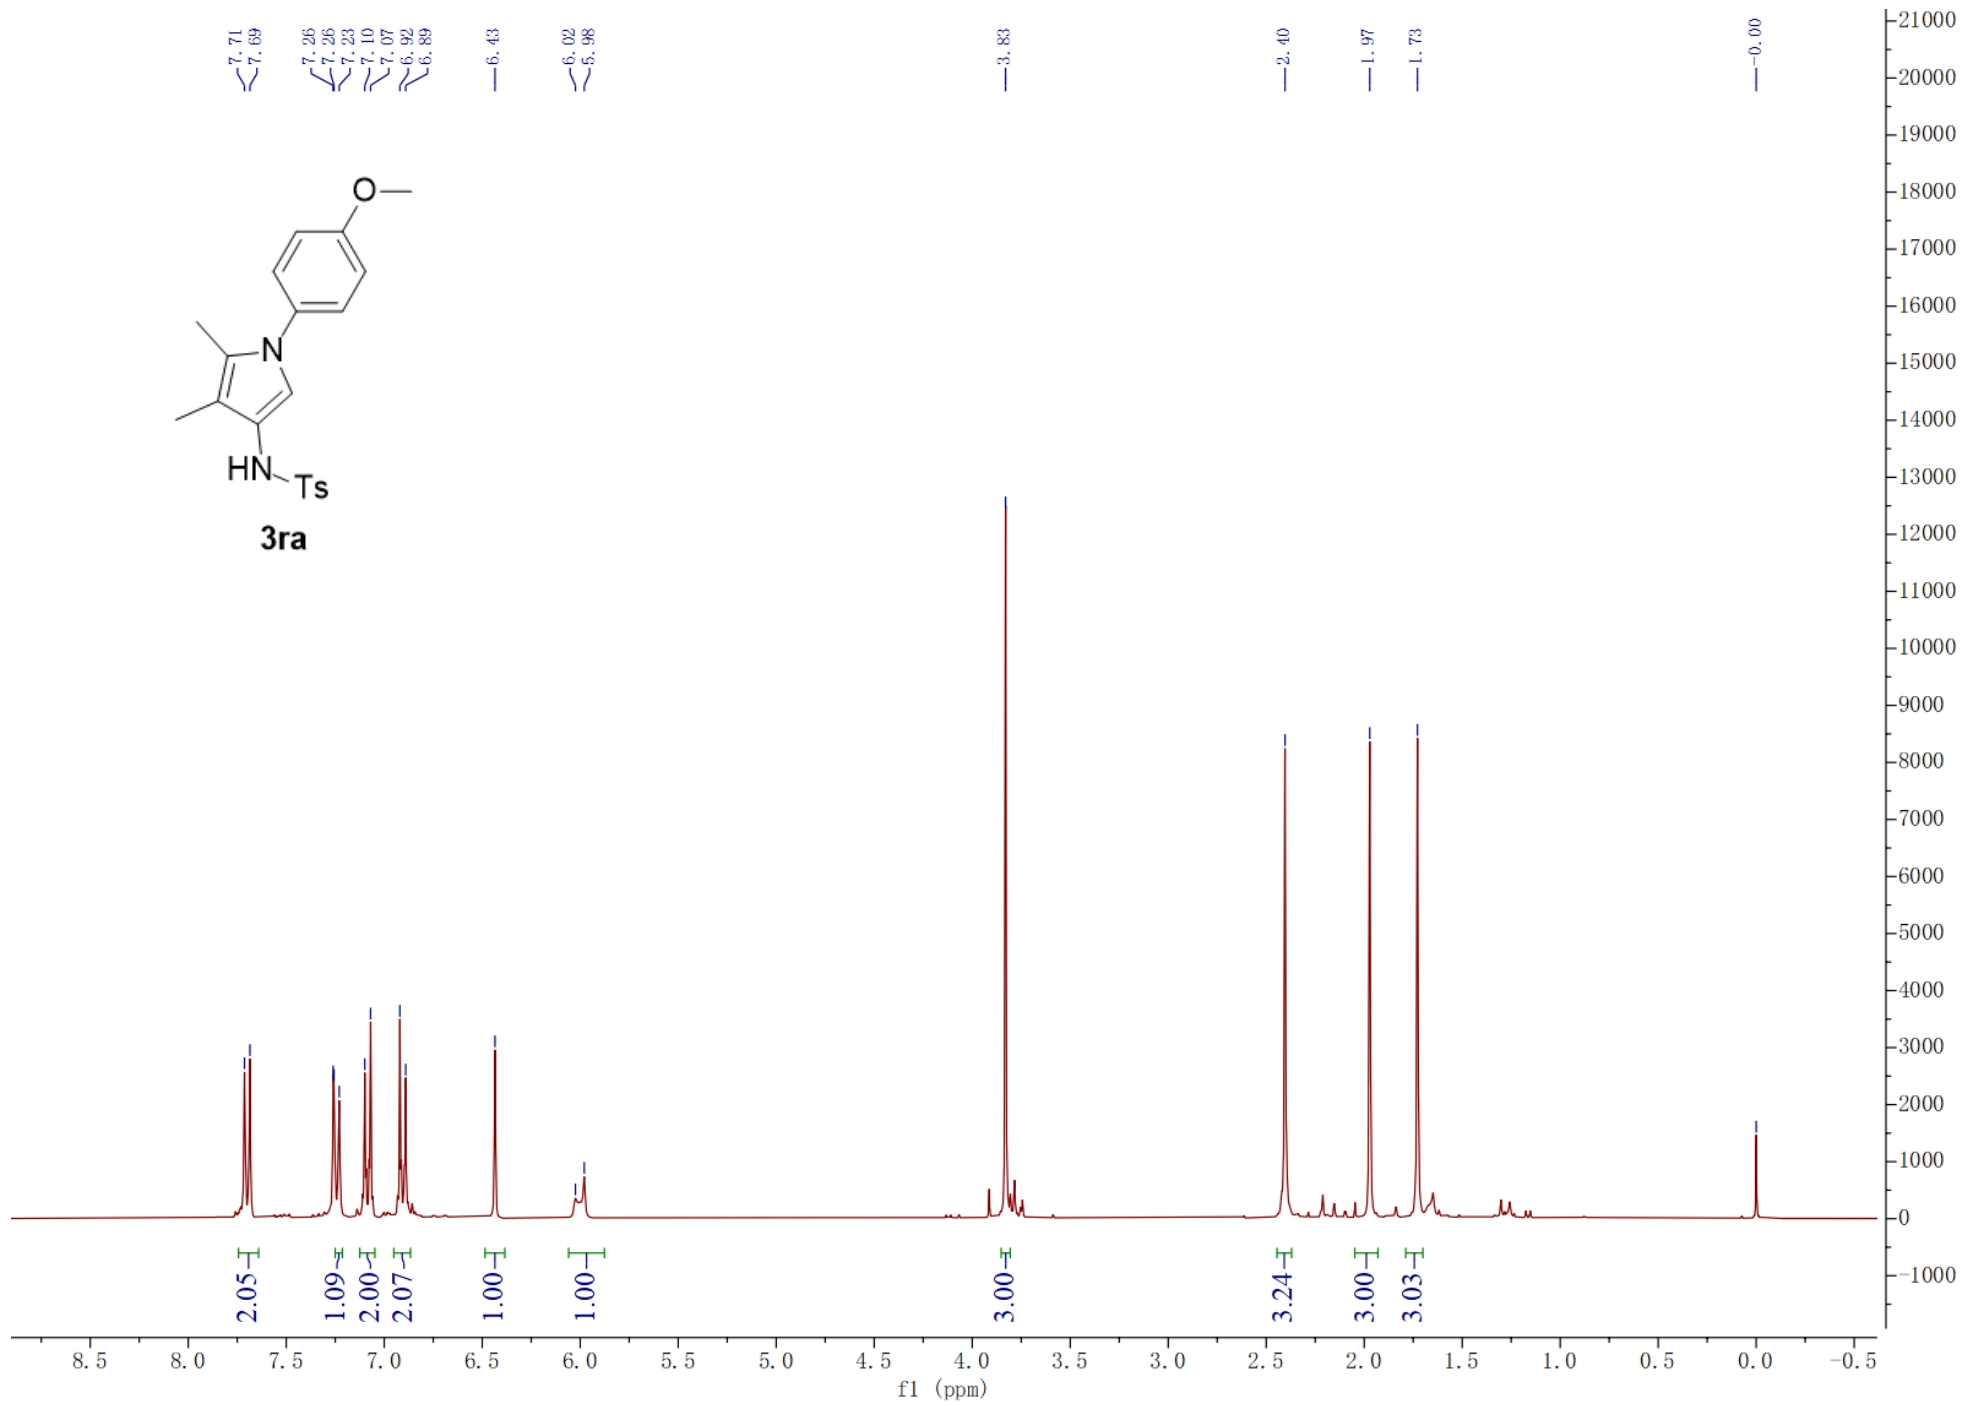

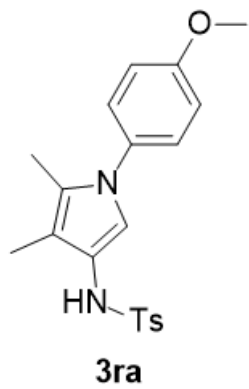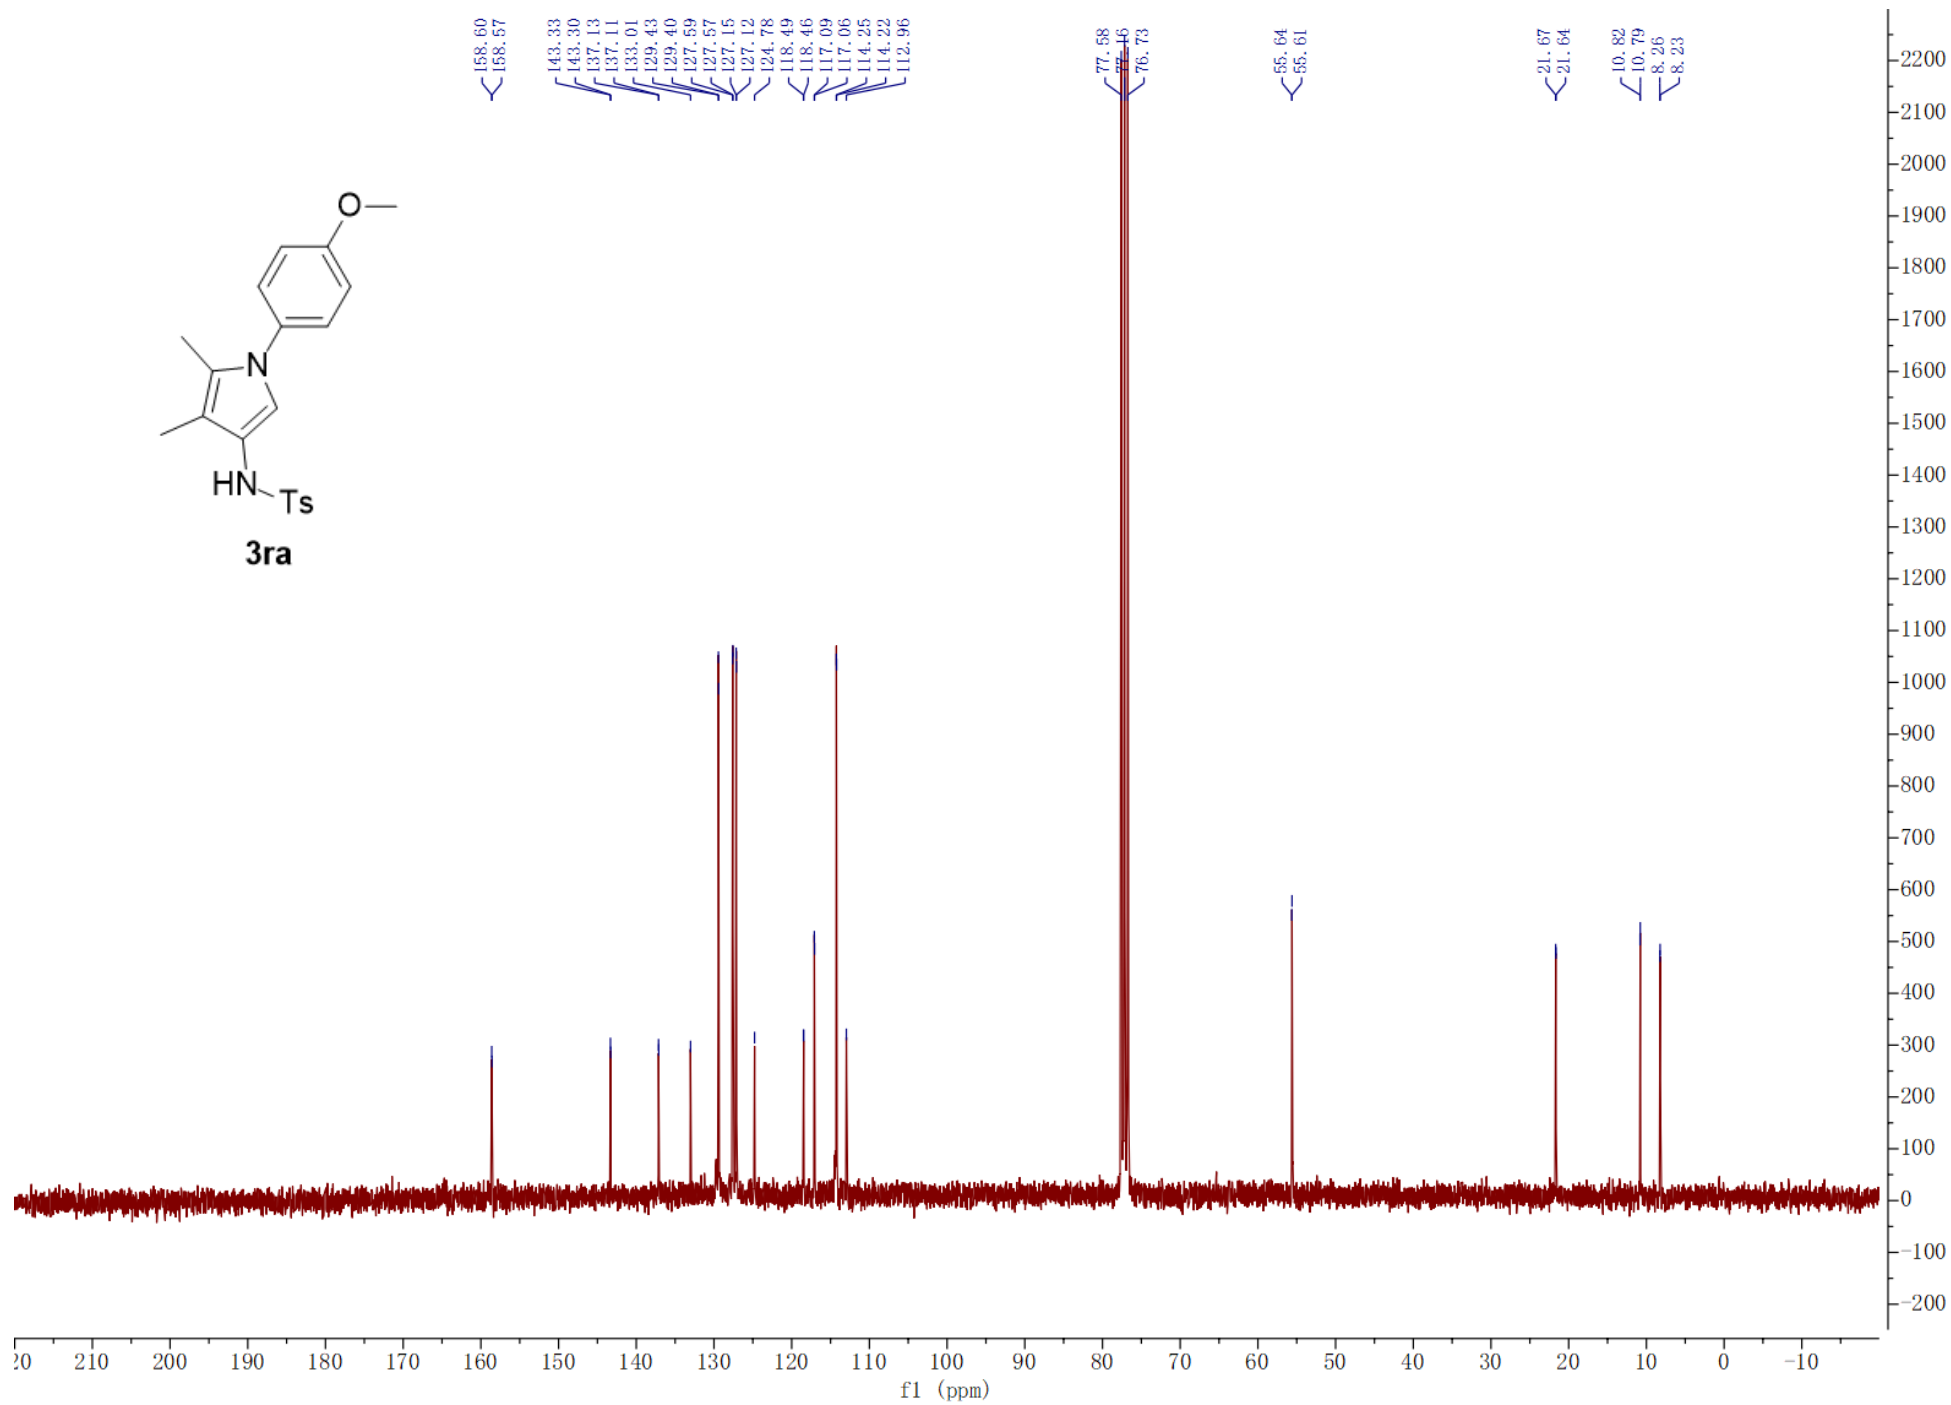

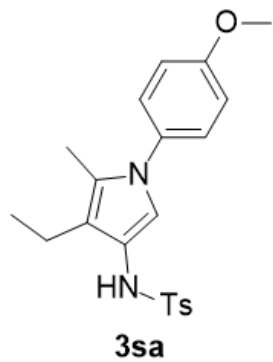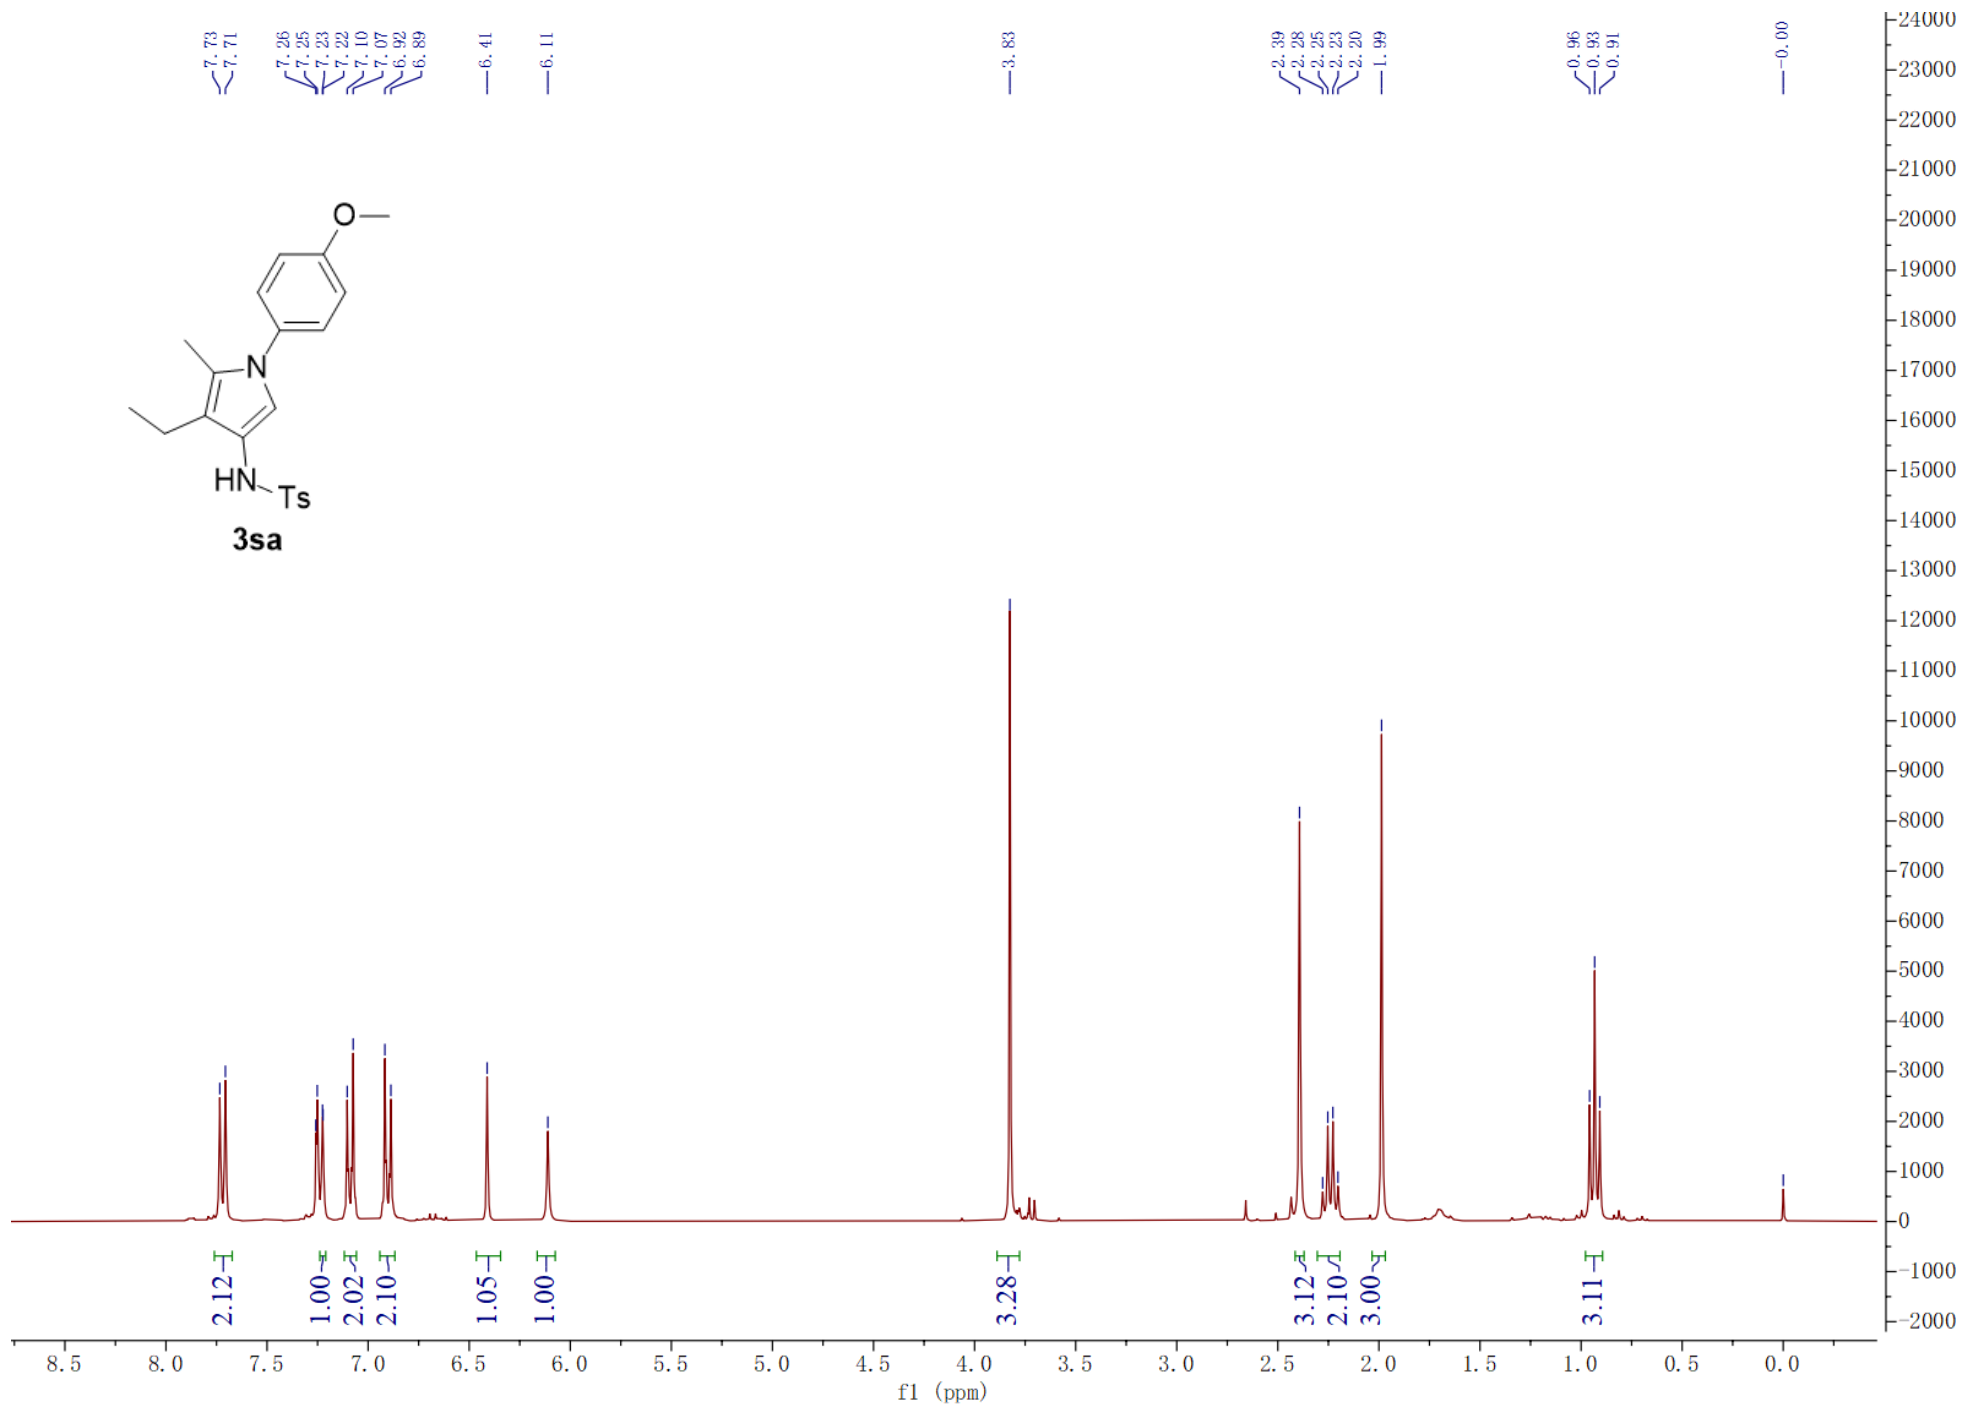

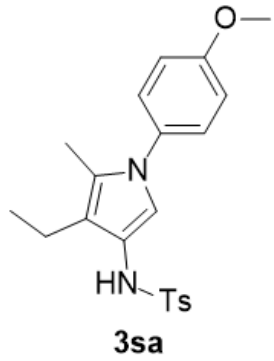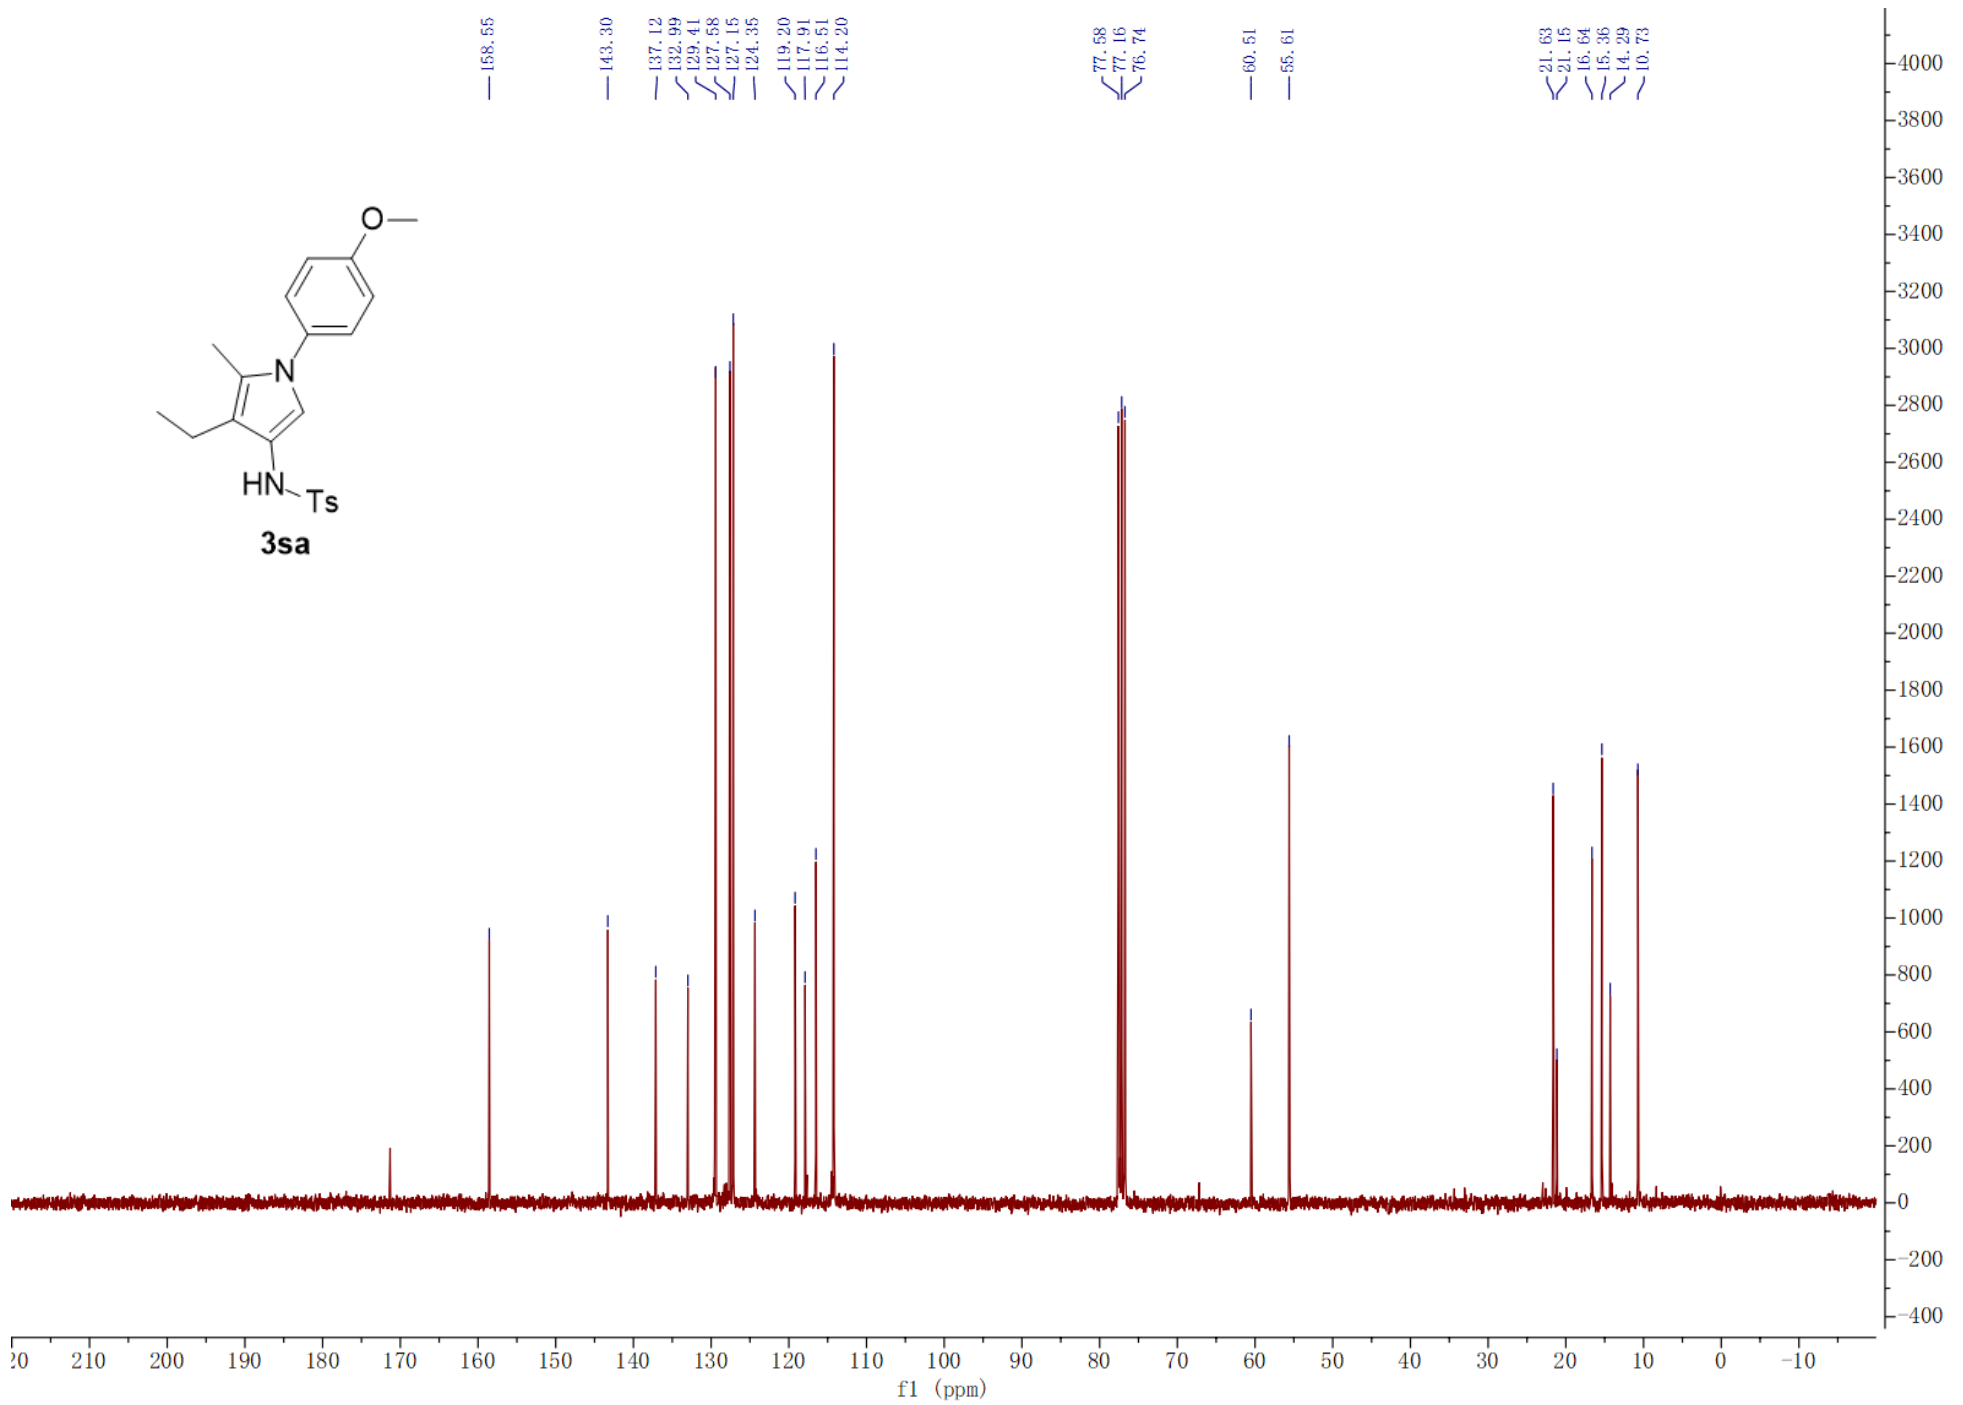

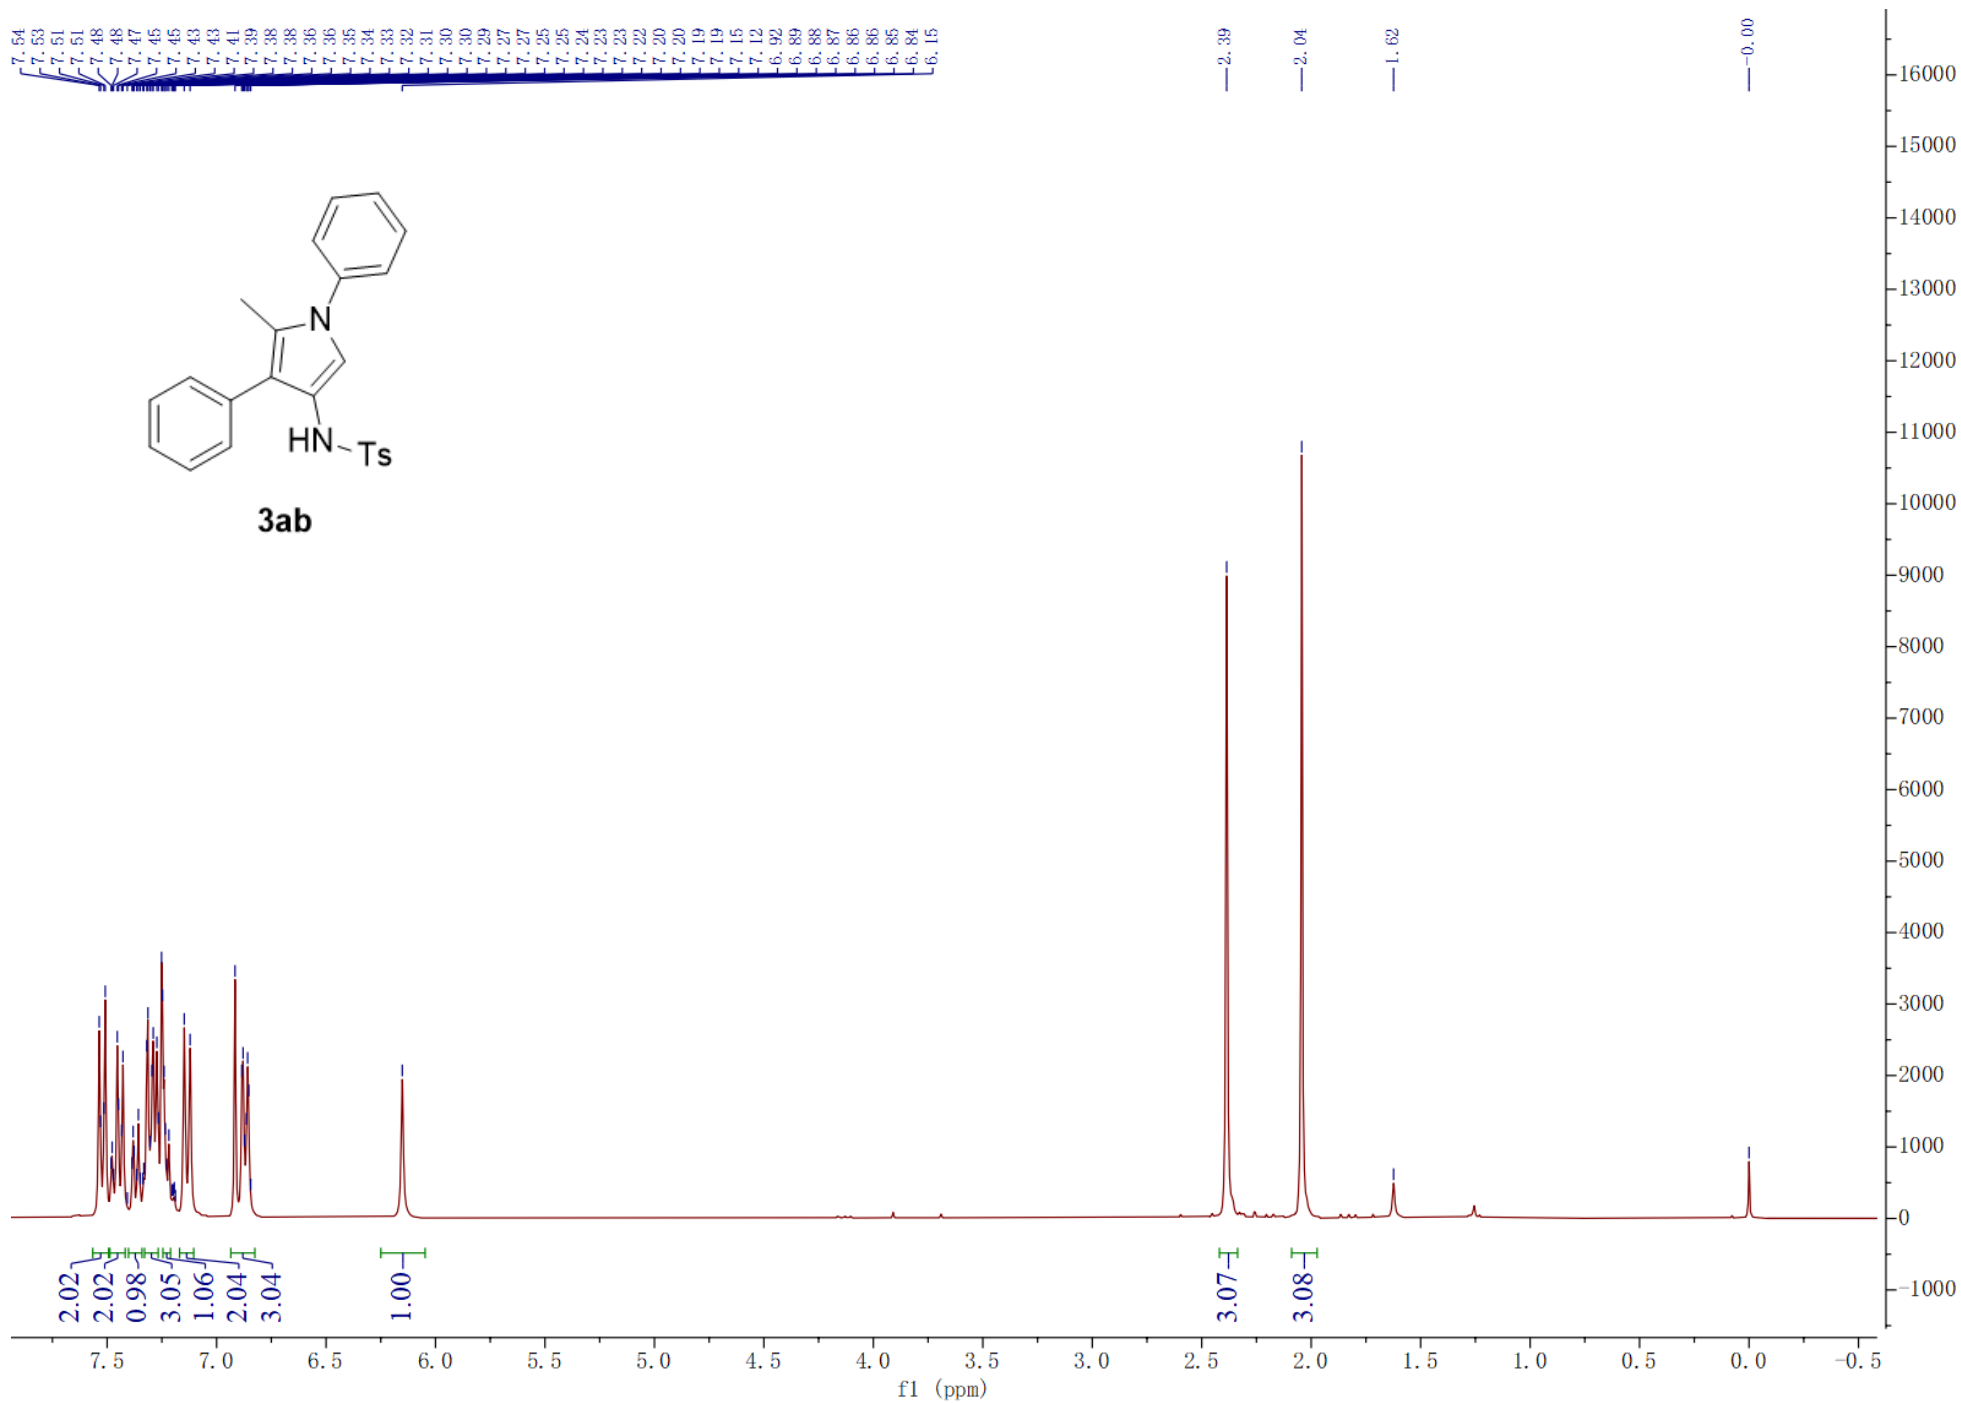

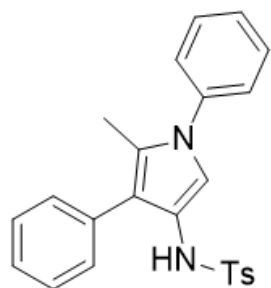

**3ab**

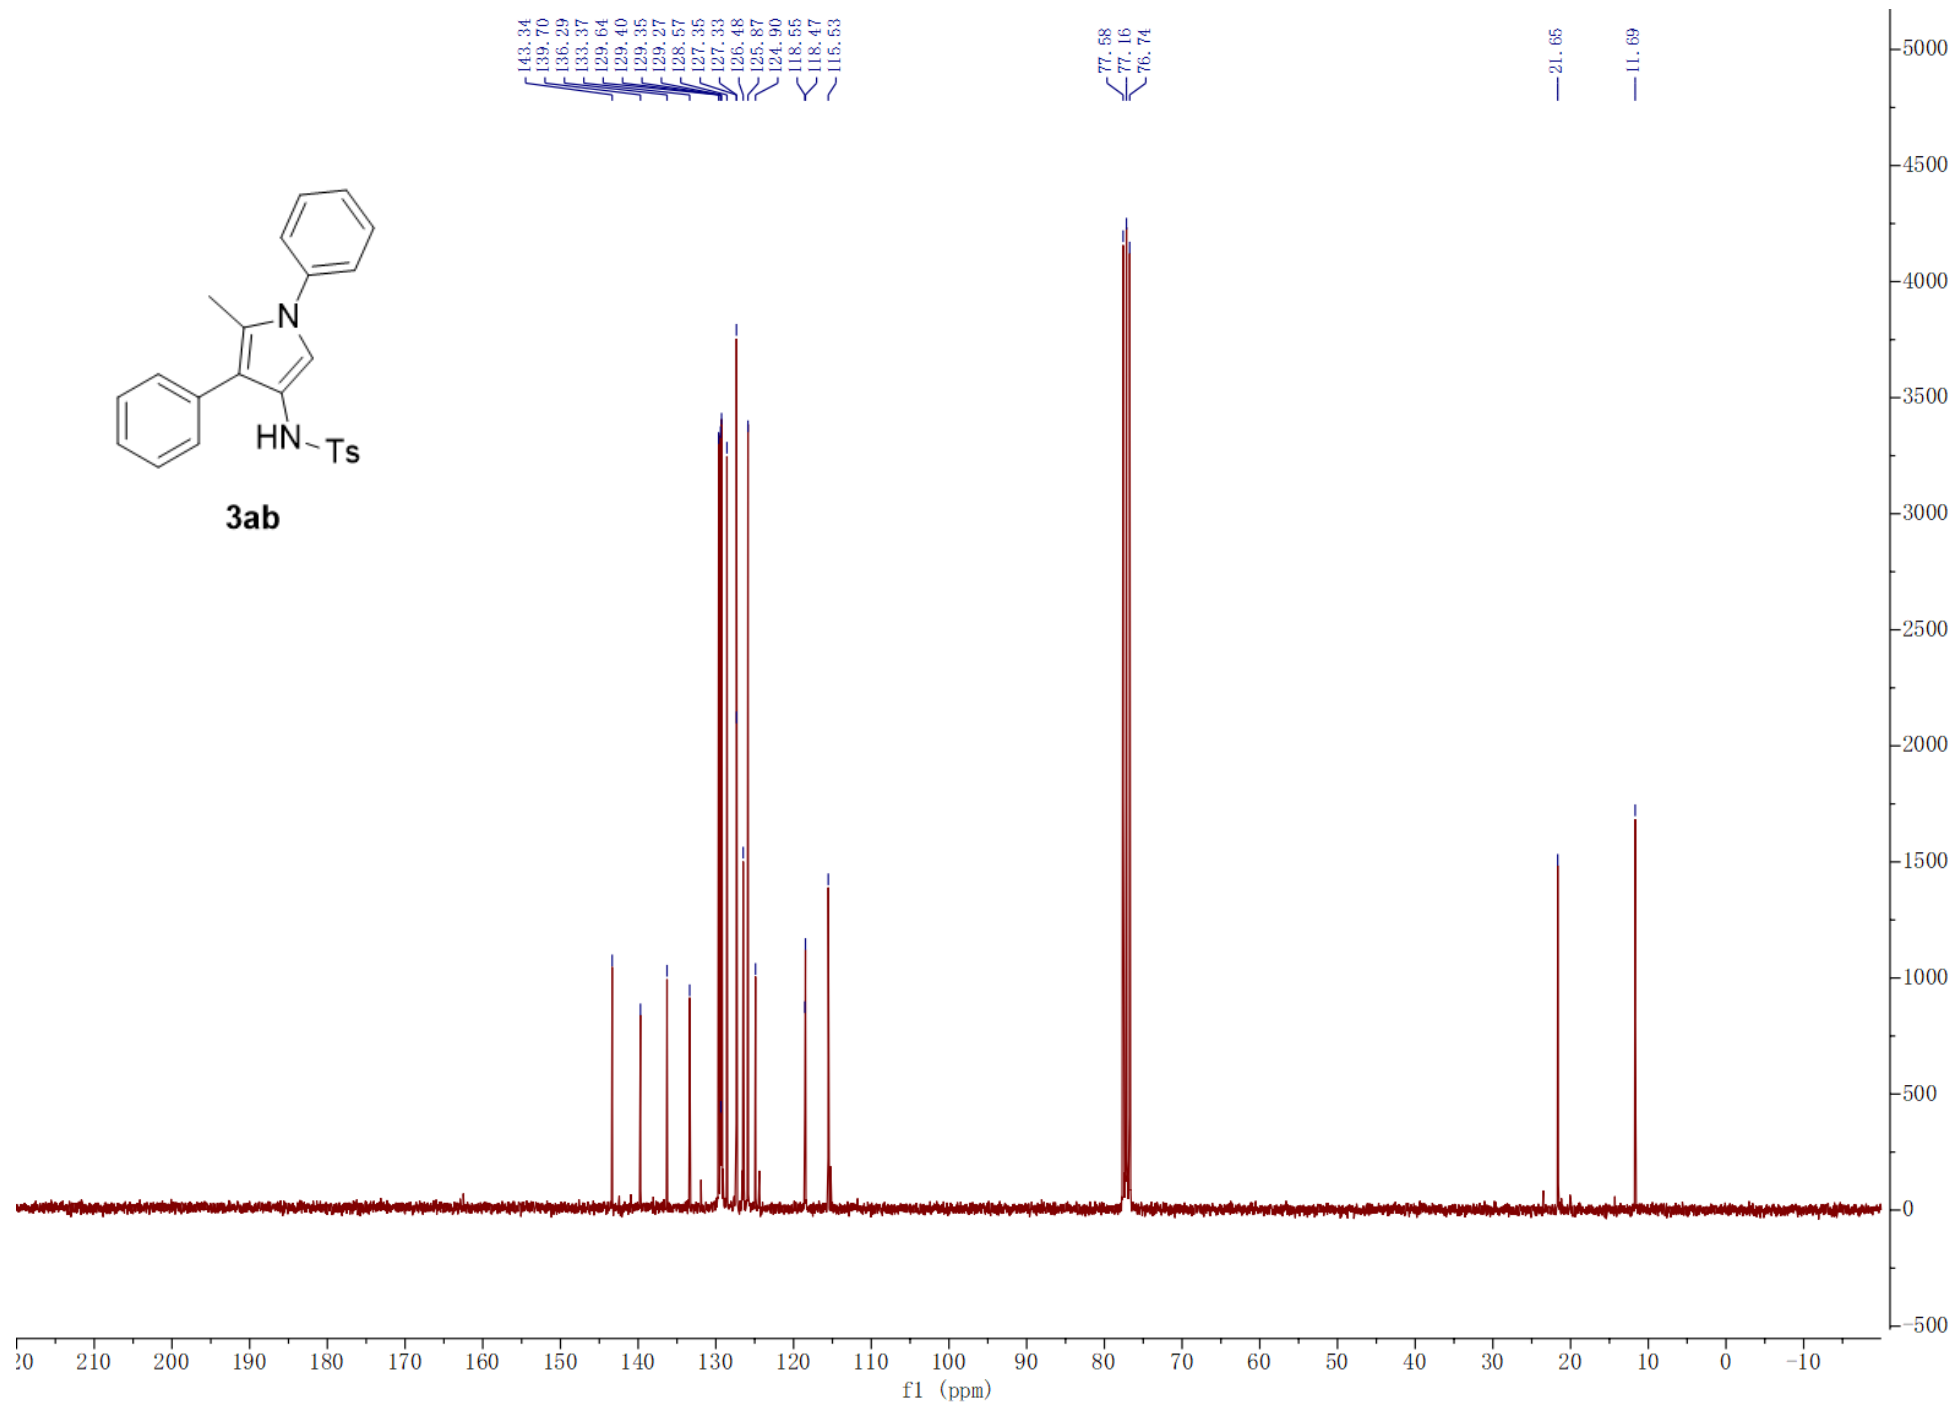

7.53  
7.52  
7.51  
7.49  
7.28  
7.28  
7.27  
7.26  
7.26  
7.25  
7.24  
7.22  
7.21  
7.19  
7.18  
7.17  
7.14  
7.12  
6.88  
6.87  
6.87  
6.86  
6.86  
6.85  
6.11

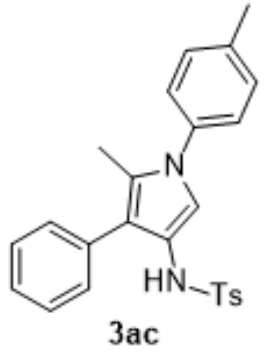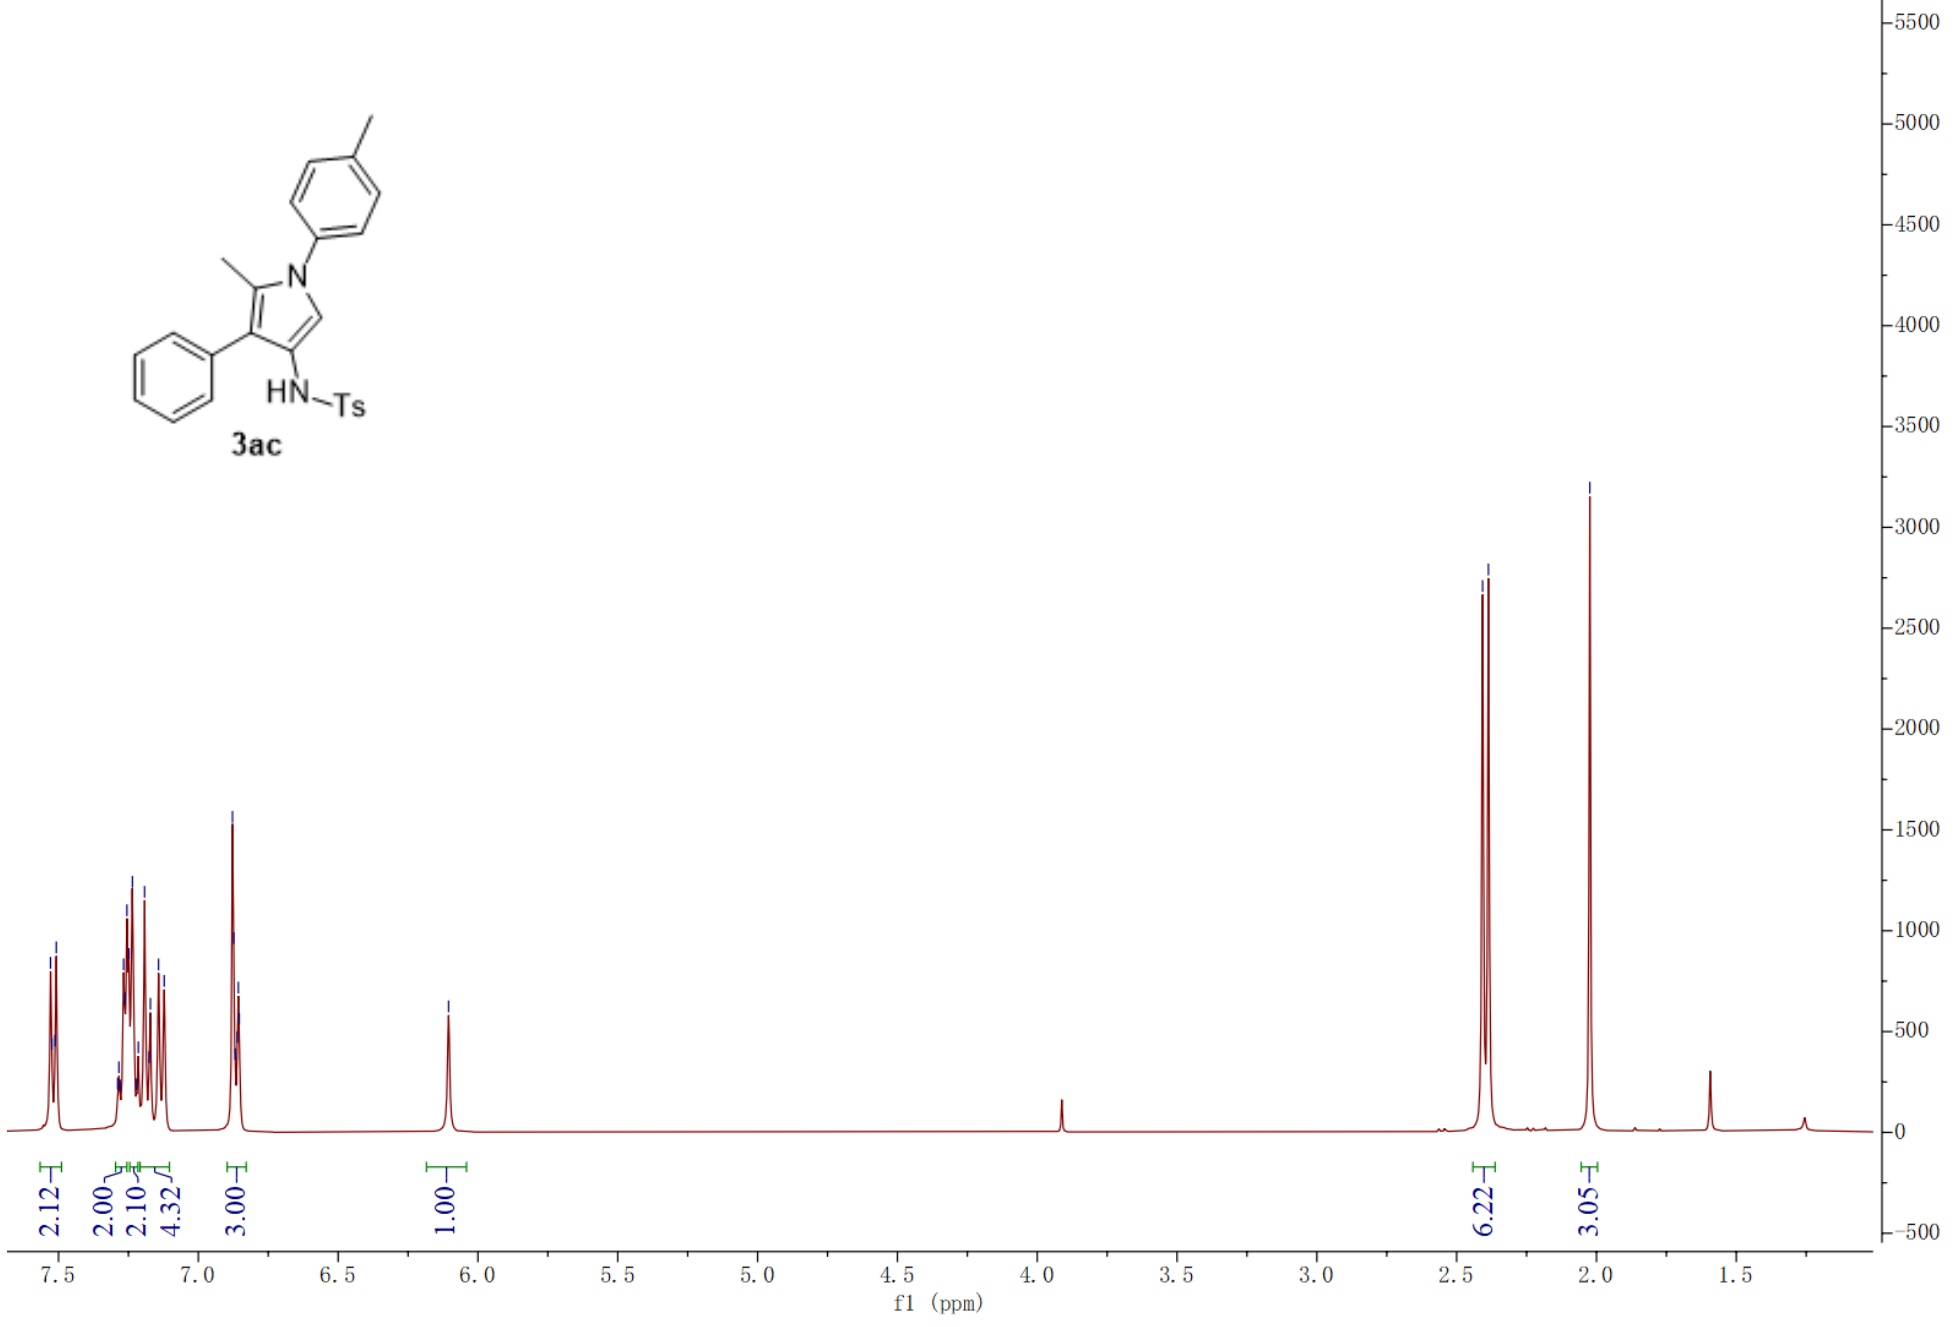

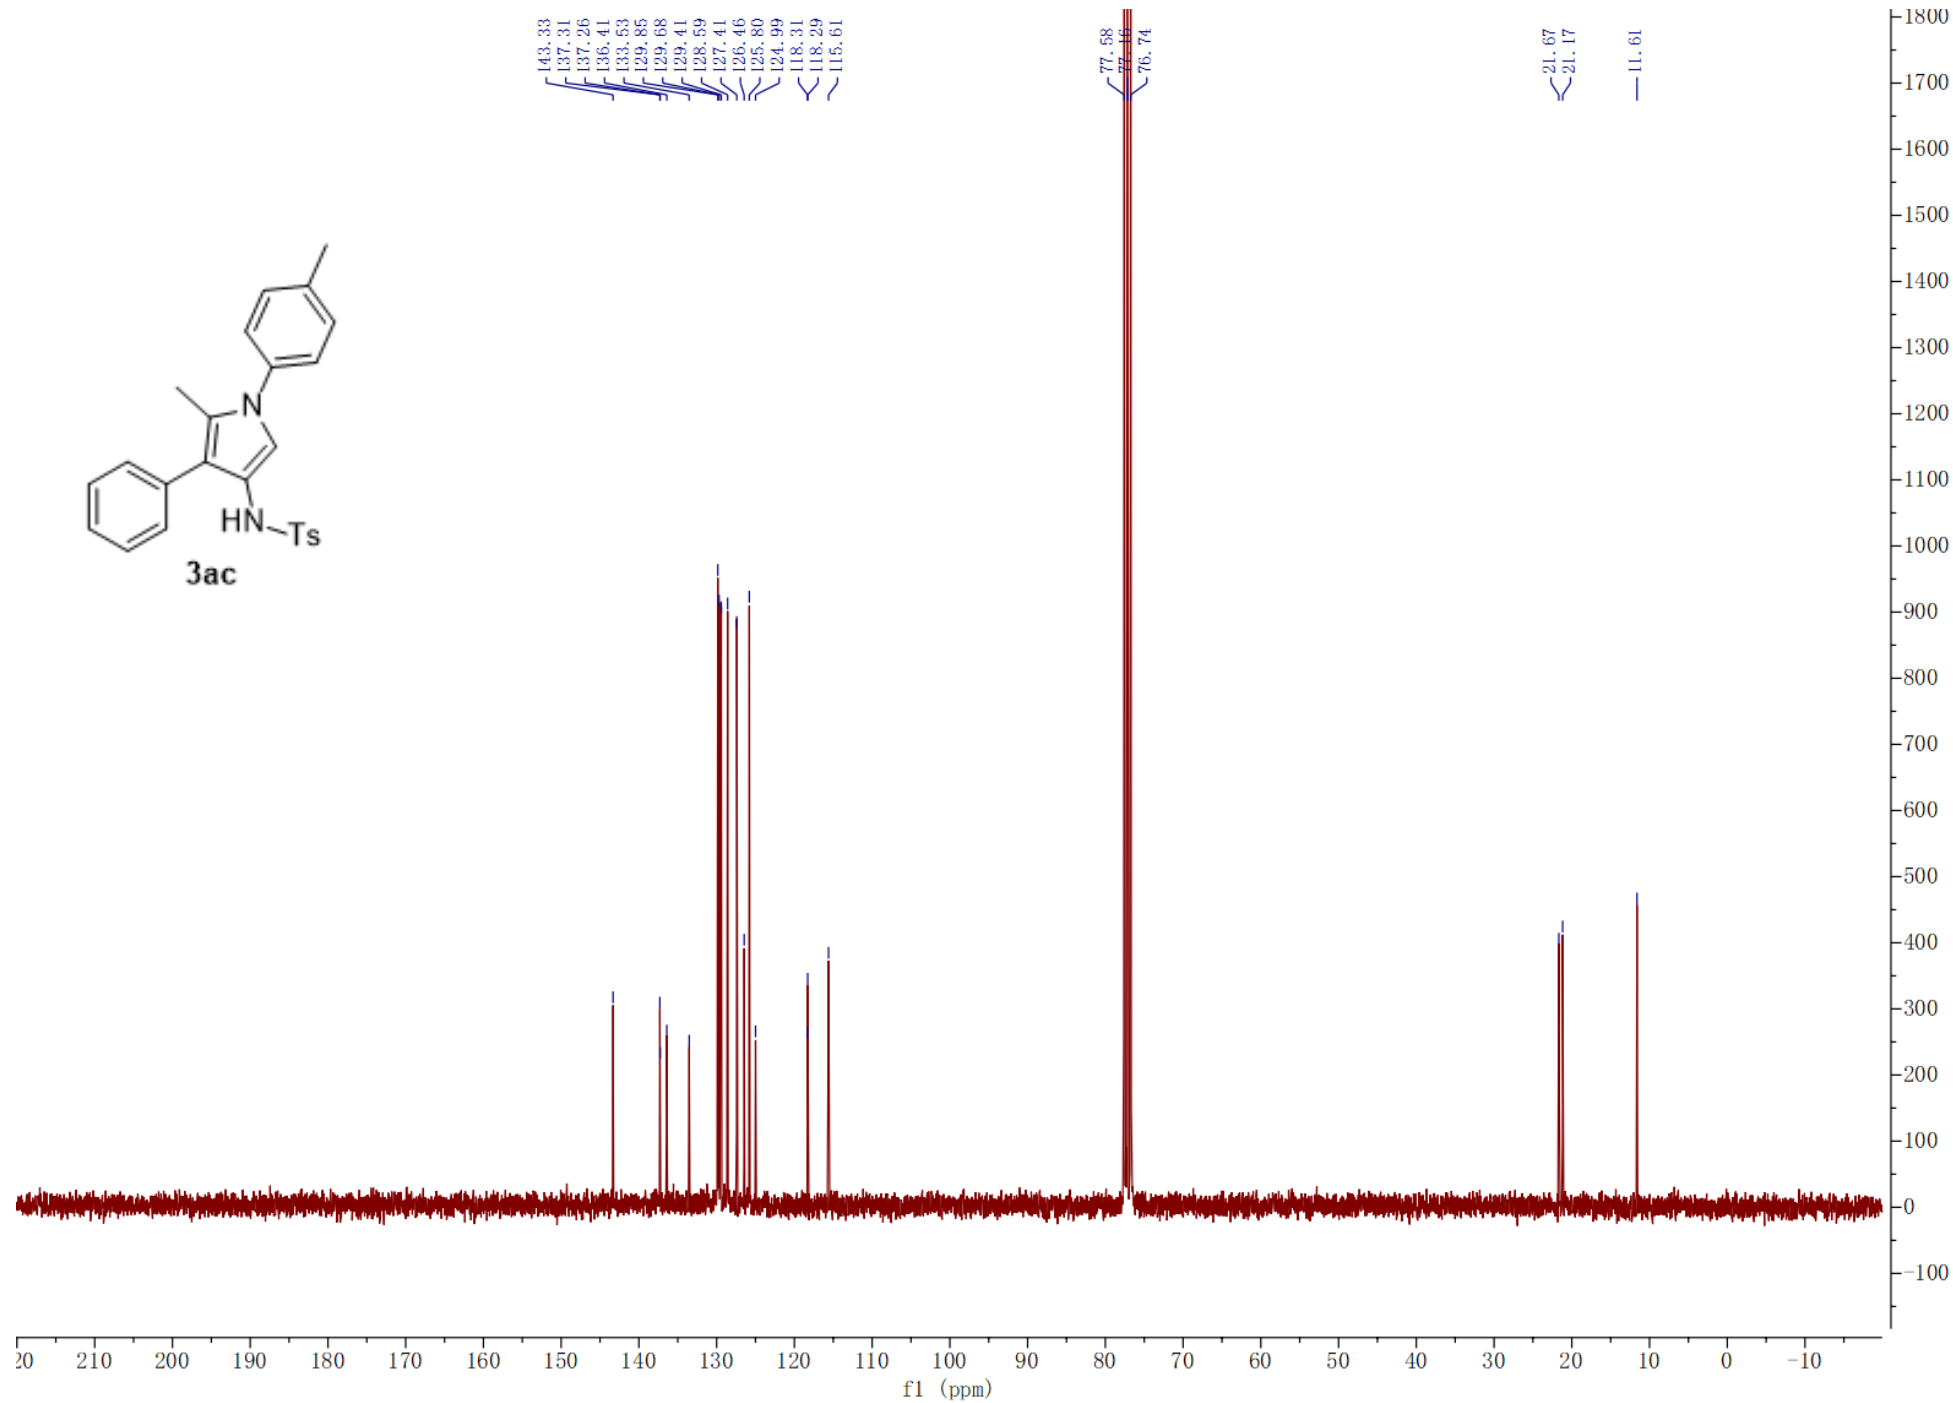



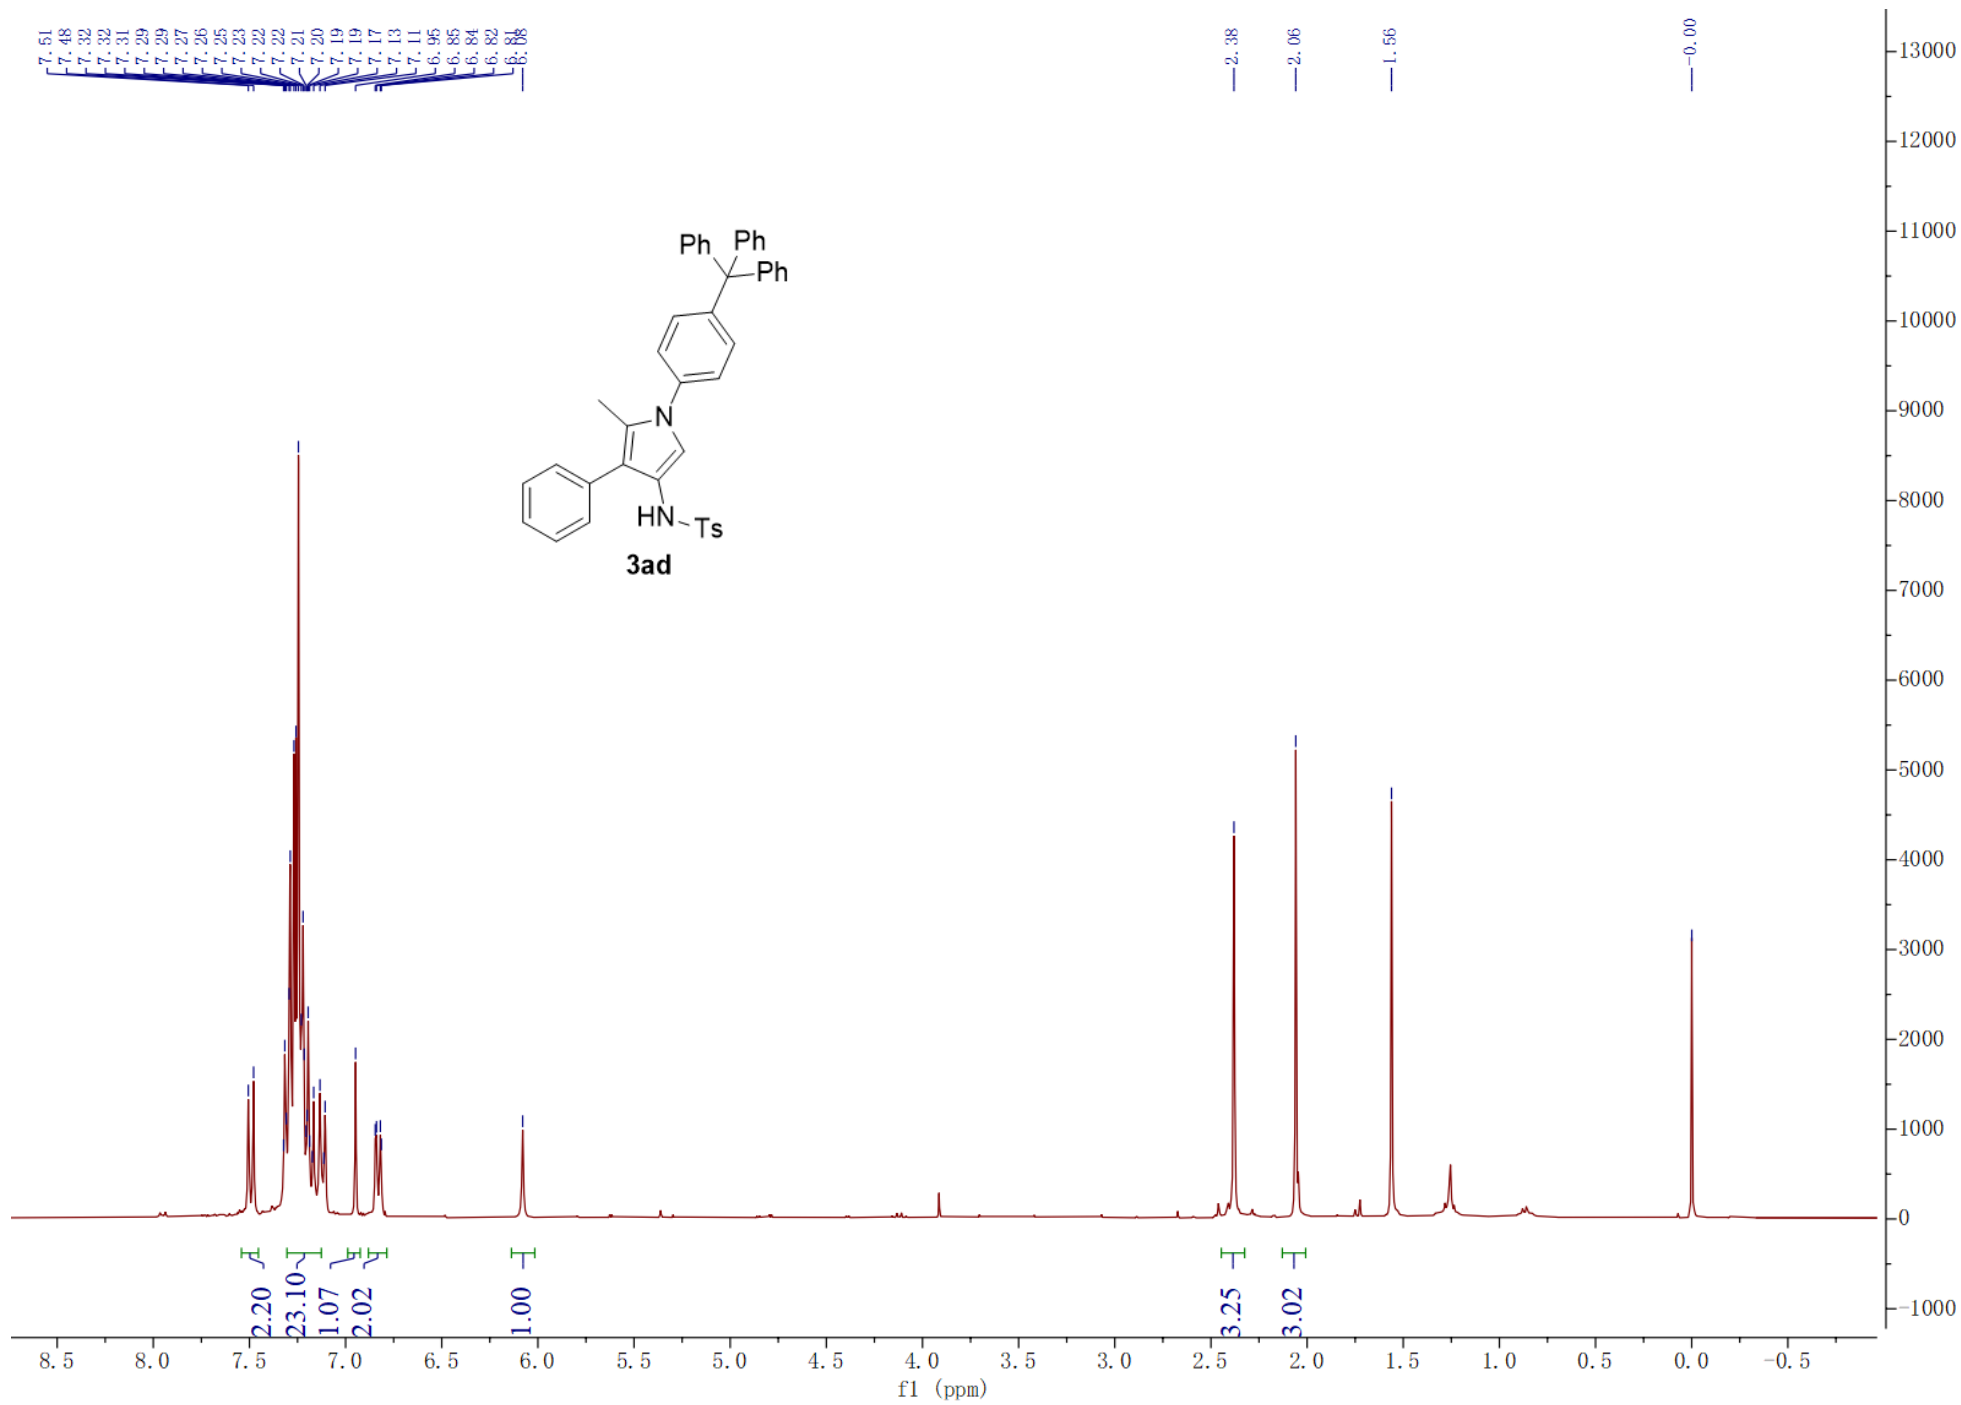

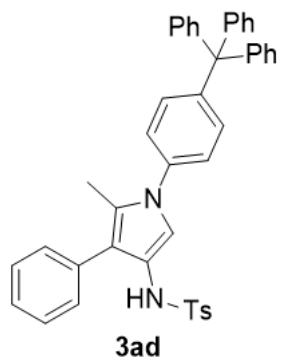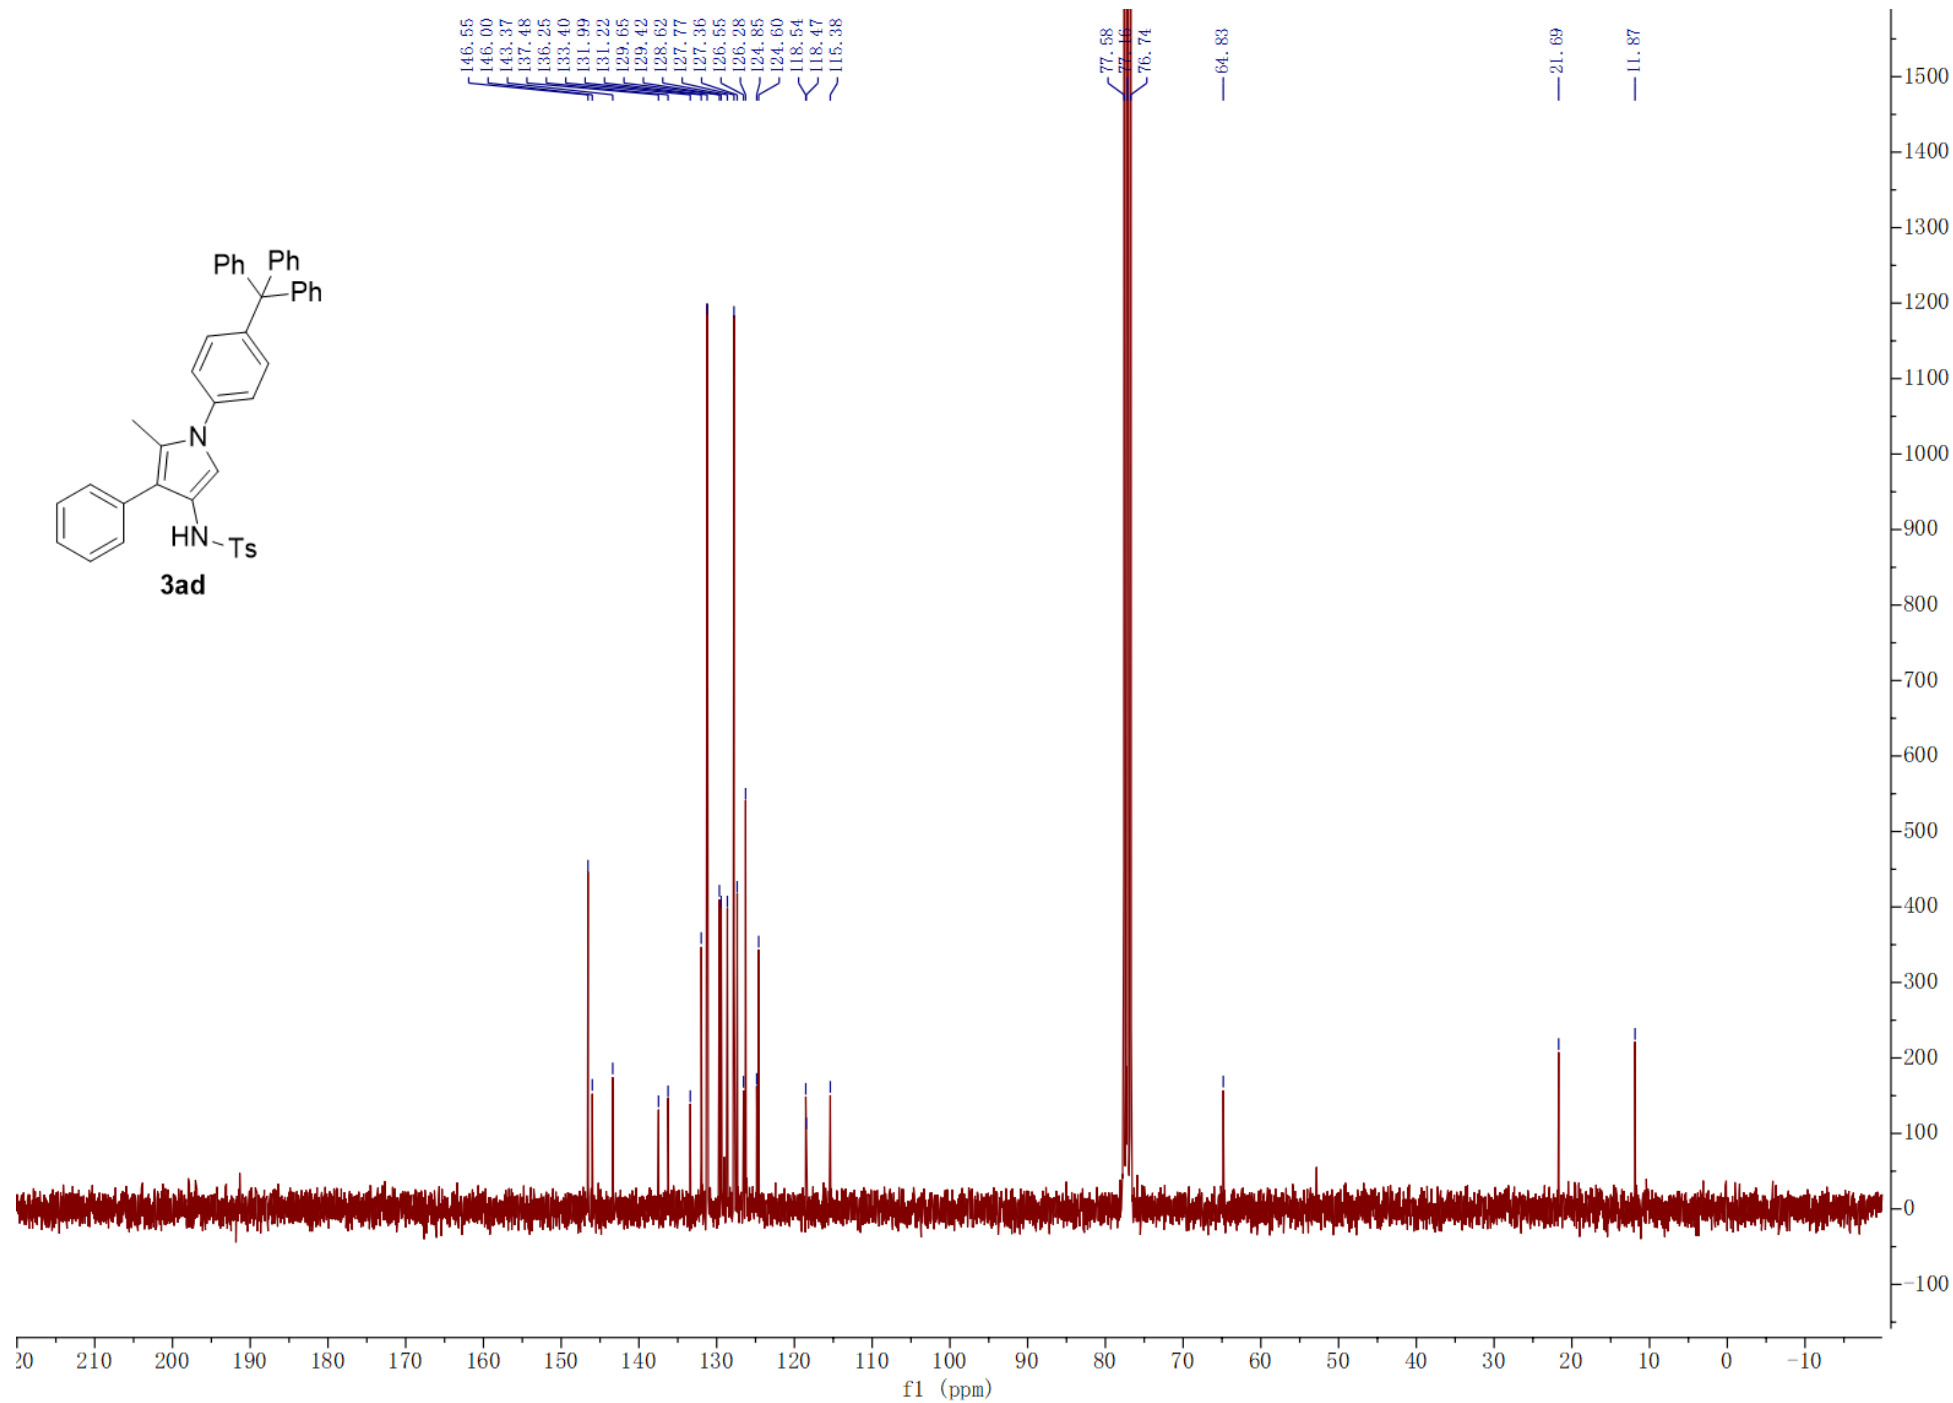

7.53  
7.52  
7.51  
7.50  
7.47  
7.46  
7.45  
7.44  
7.42  
7.41  
7.39  
7.37  
7.27  
7.26  
7.25  
7.24  
7.23  
7.23  
7.22  
7.21  
7.21  
7.20  
7.14  
7.11  
7.04  
7.04  
7.02  
7.01  
6.87  
6.87  
6.86  
6.85  
6.84  
6.11

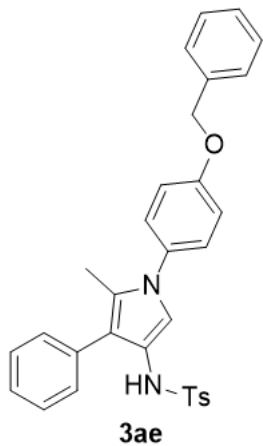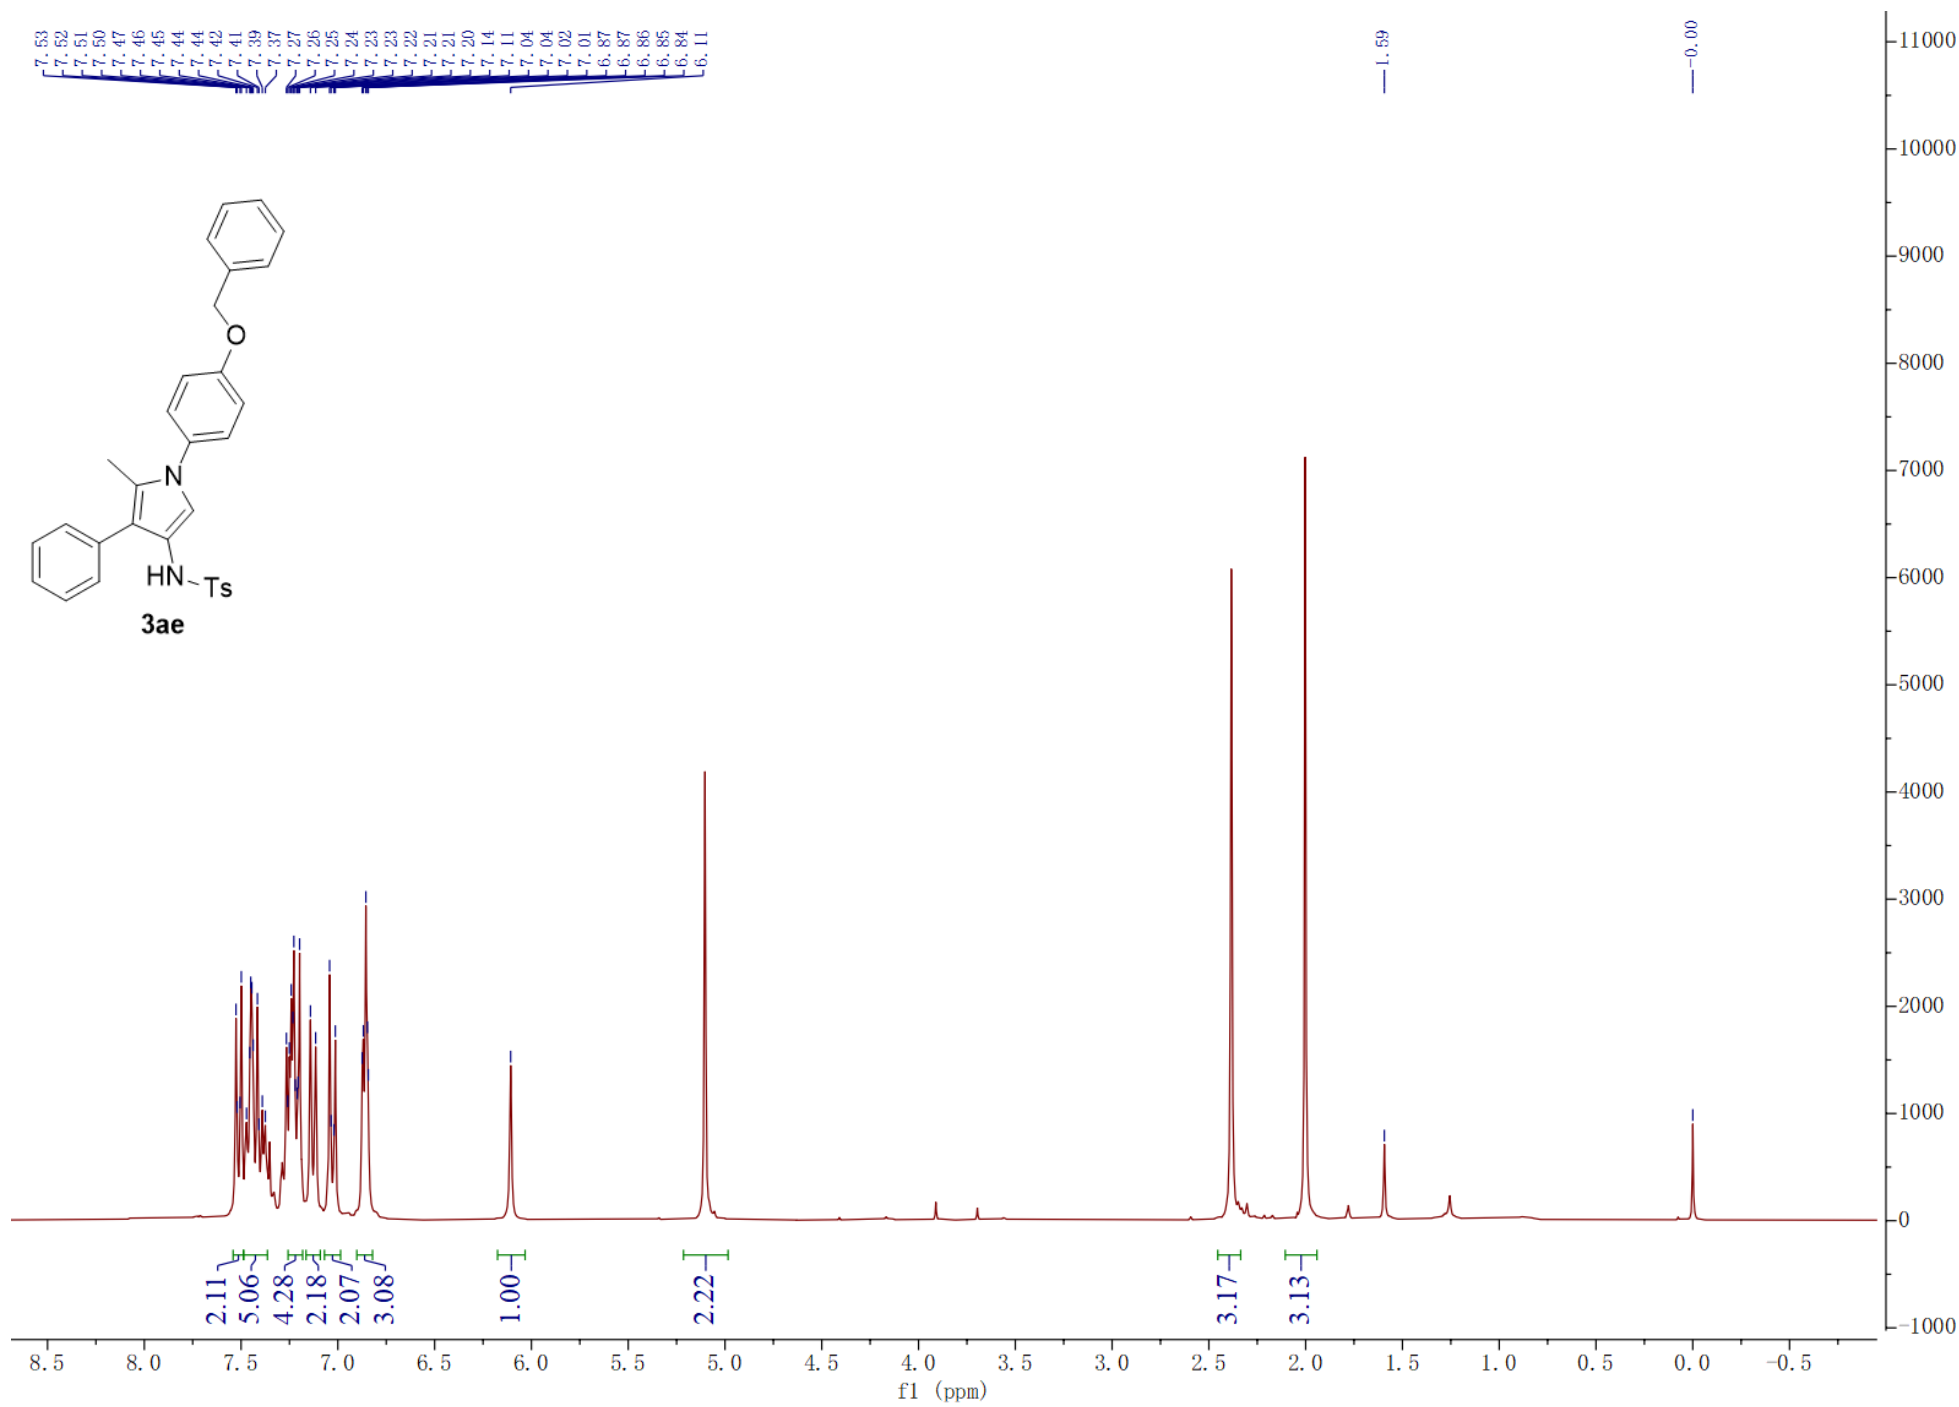

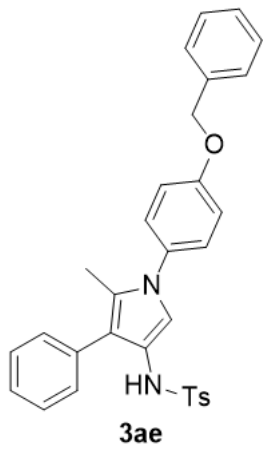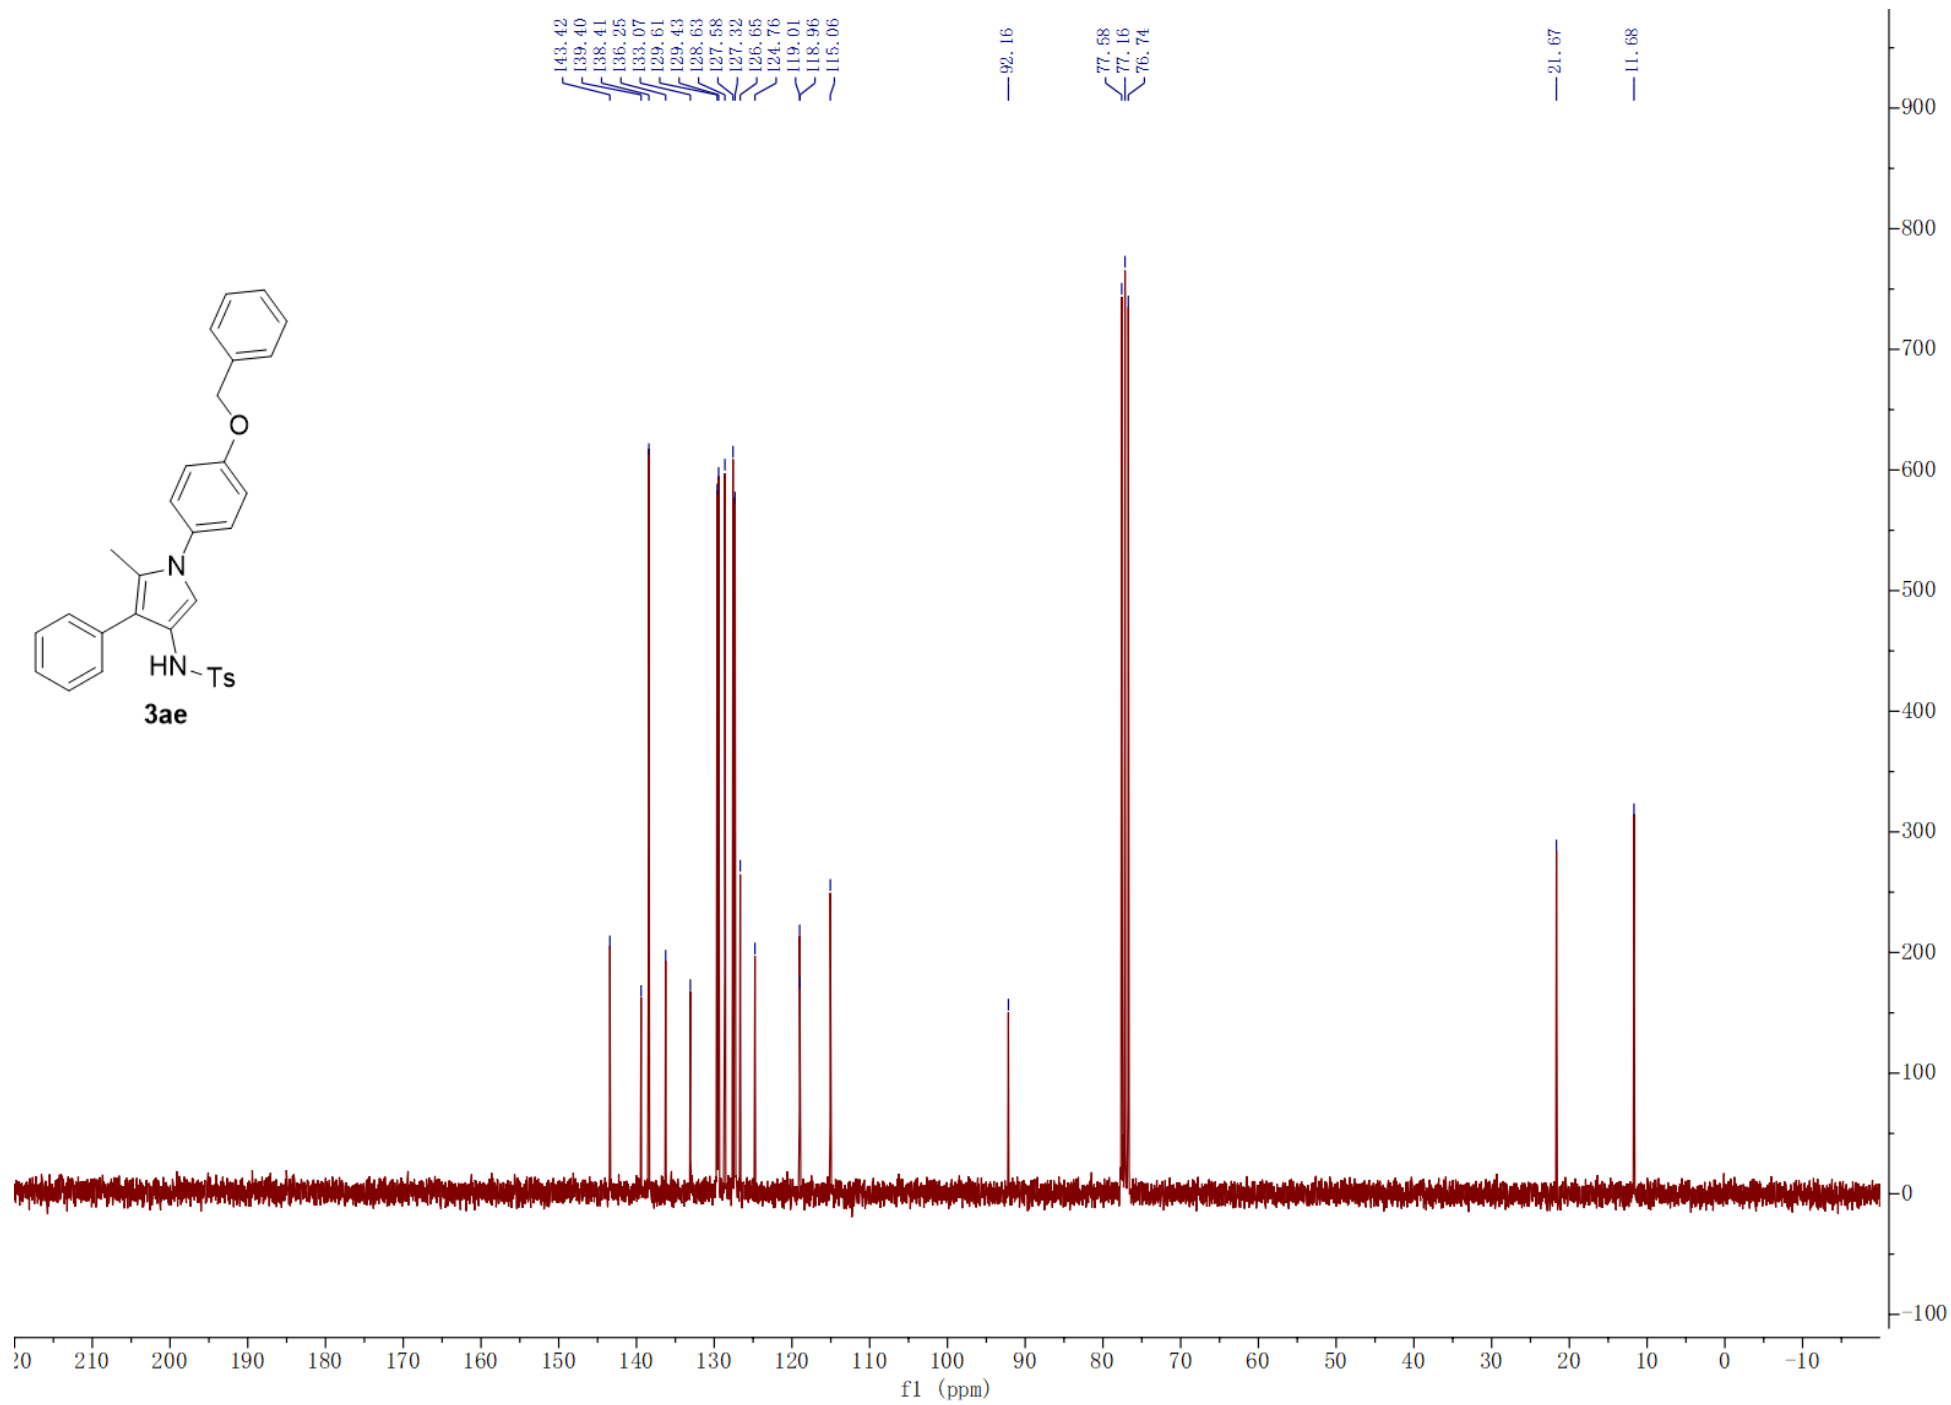

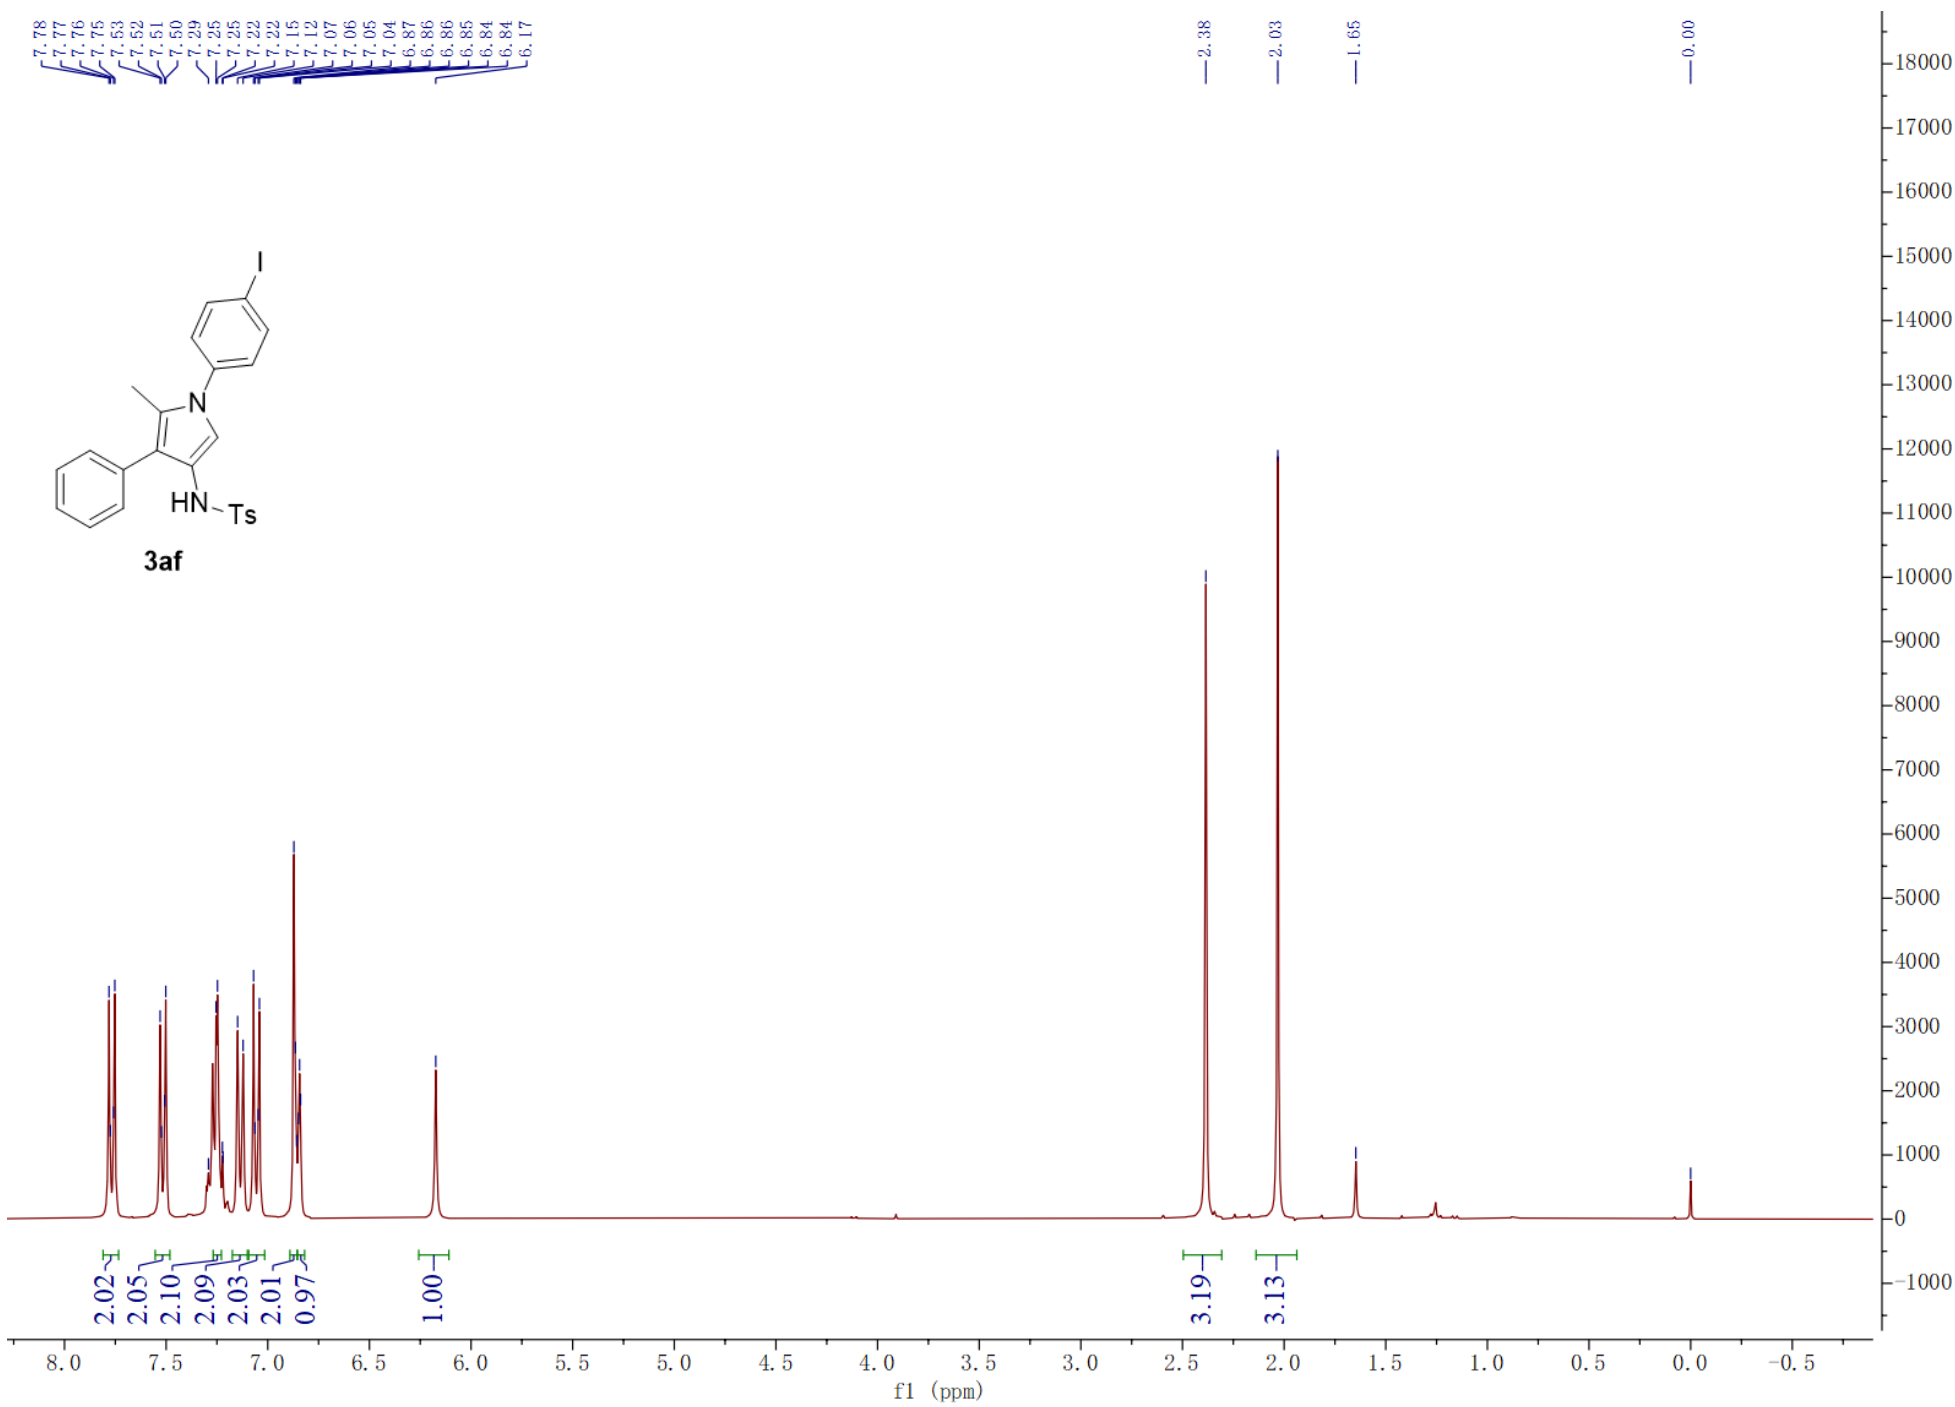

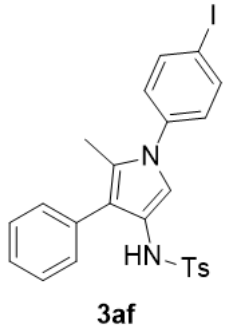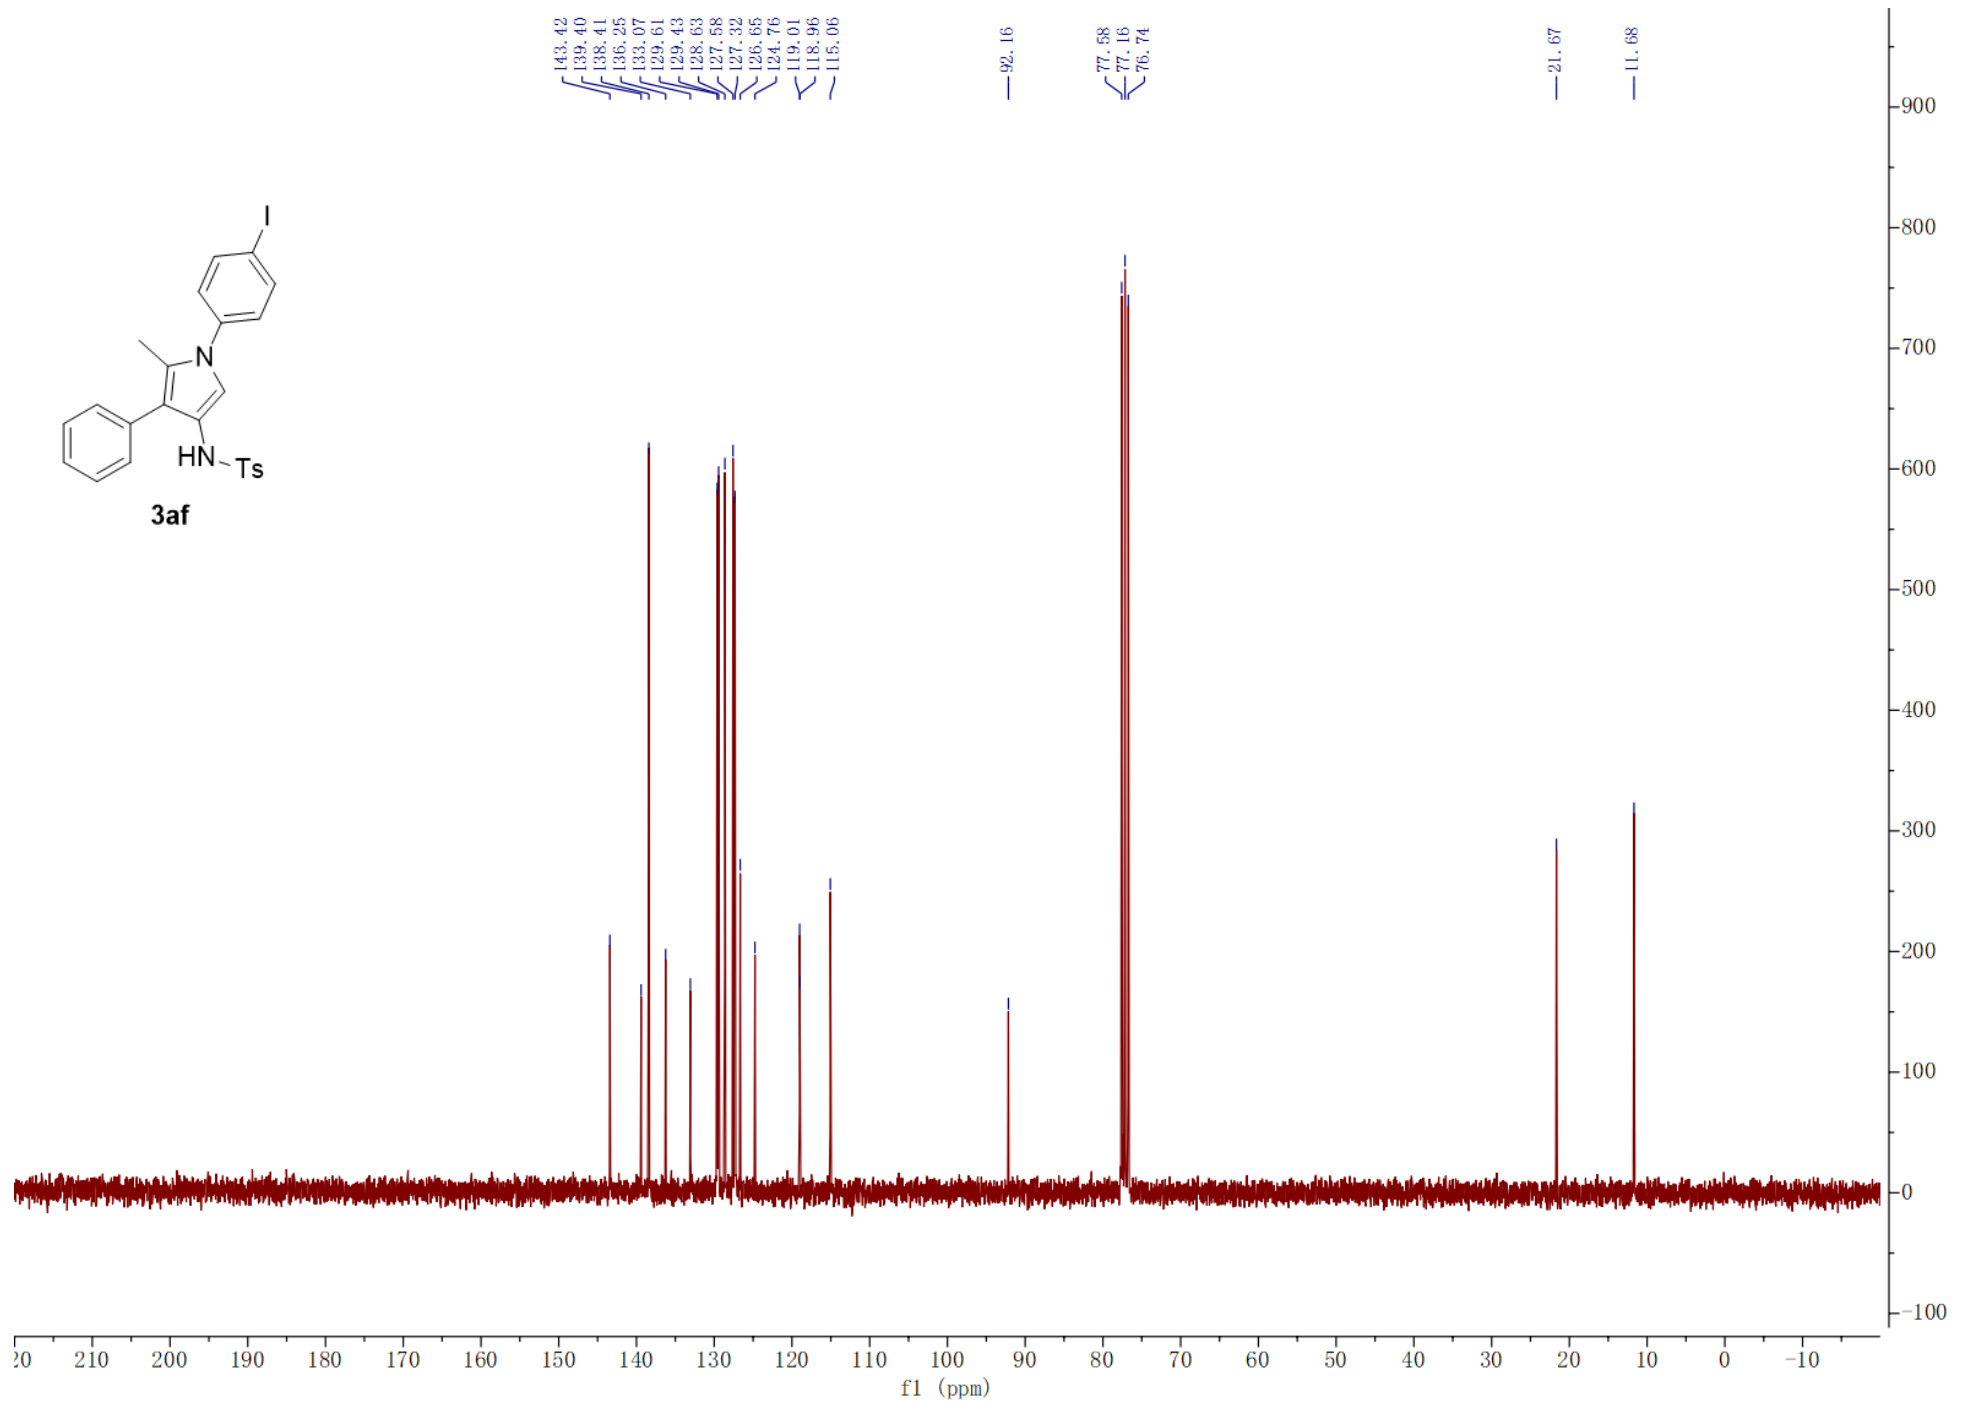

7.59  
7.57  
7.56  
7.53  
7.52  
7.51  
7.50  
7.30  
7.29  
7.27  
7.27  
7.26  
7.25  
7.24  
7.24  
7.24  
7.23  
7.21  
7.20  
7.19  
7.18  
7.17  
7.15  
7.13  
6.88  
6.87  
6.86  
6.86  
6.85  
6.84  
6.84  
6.15

2.39  
2.03  
1.63  
-0.00

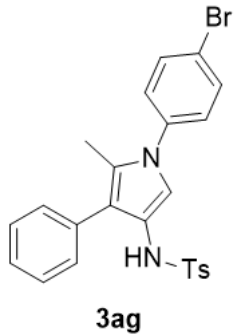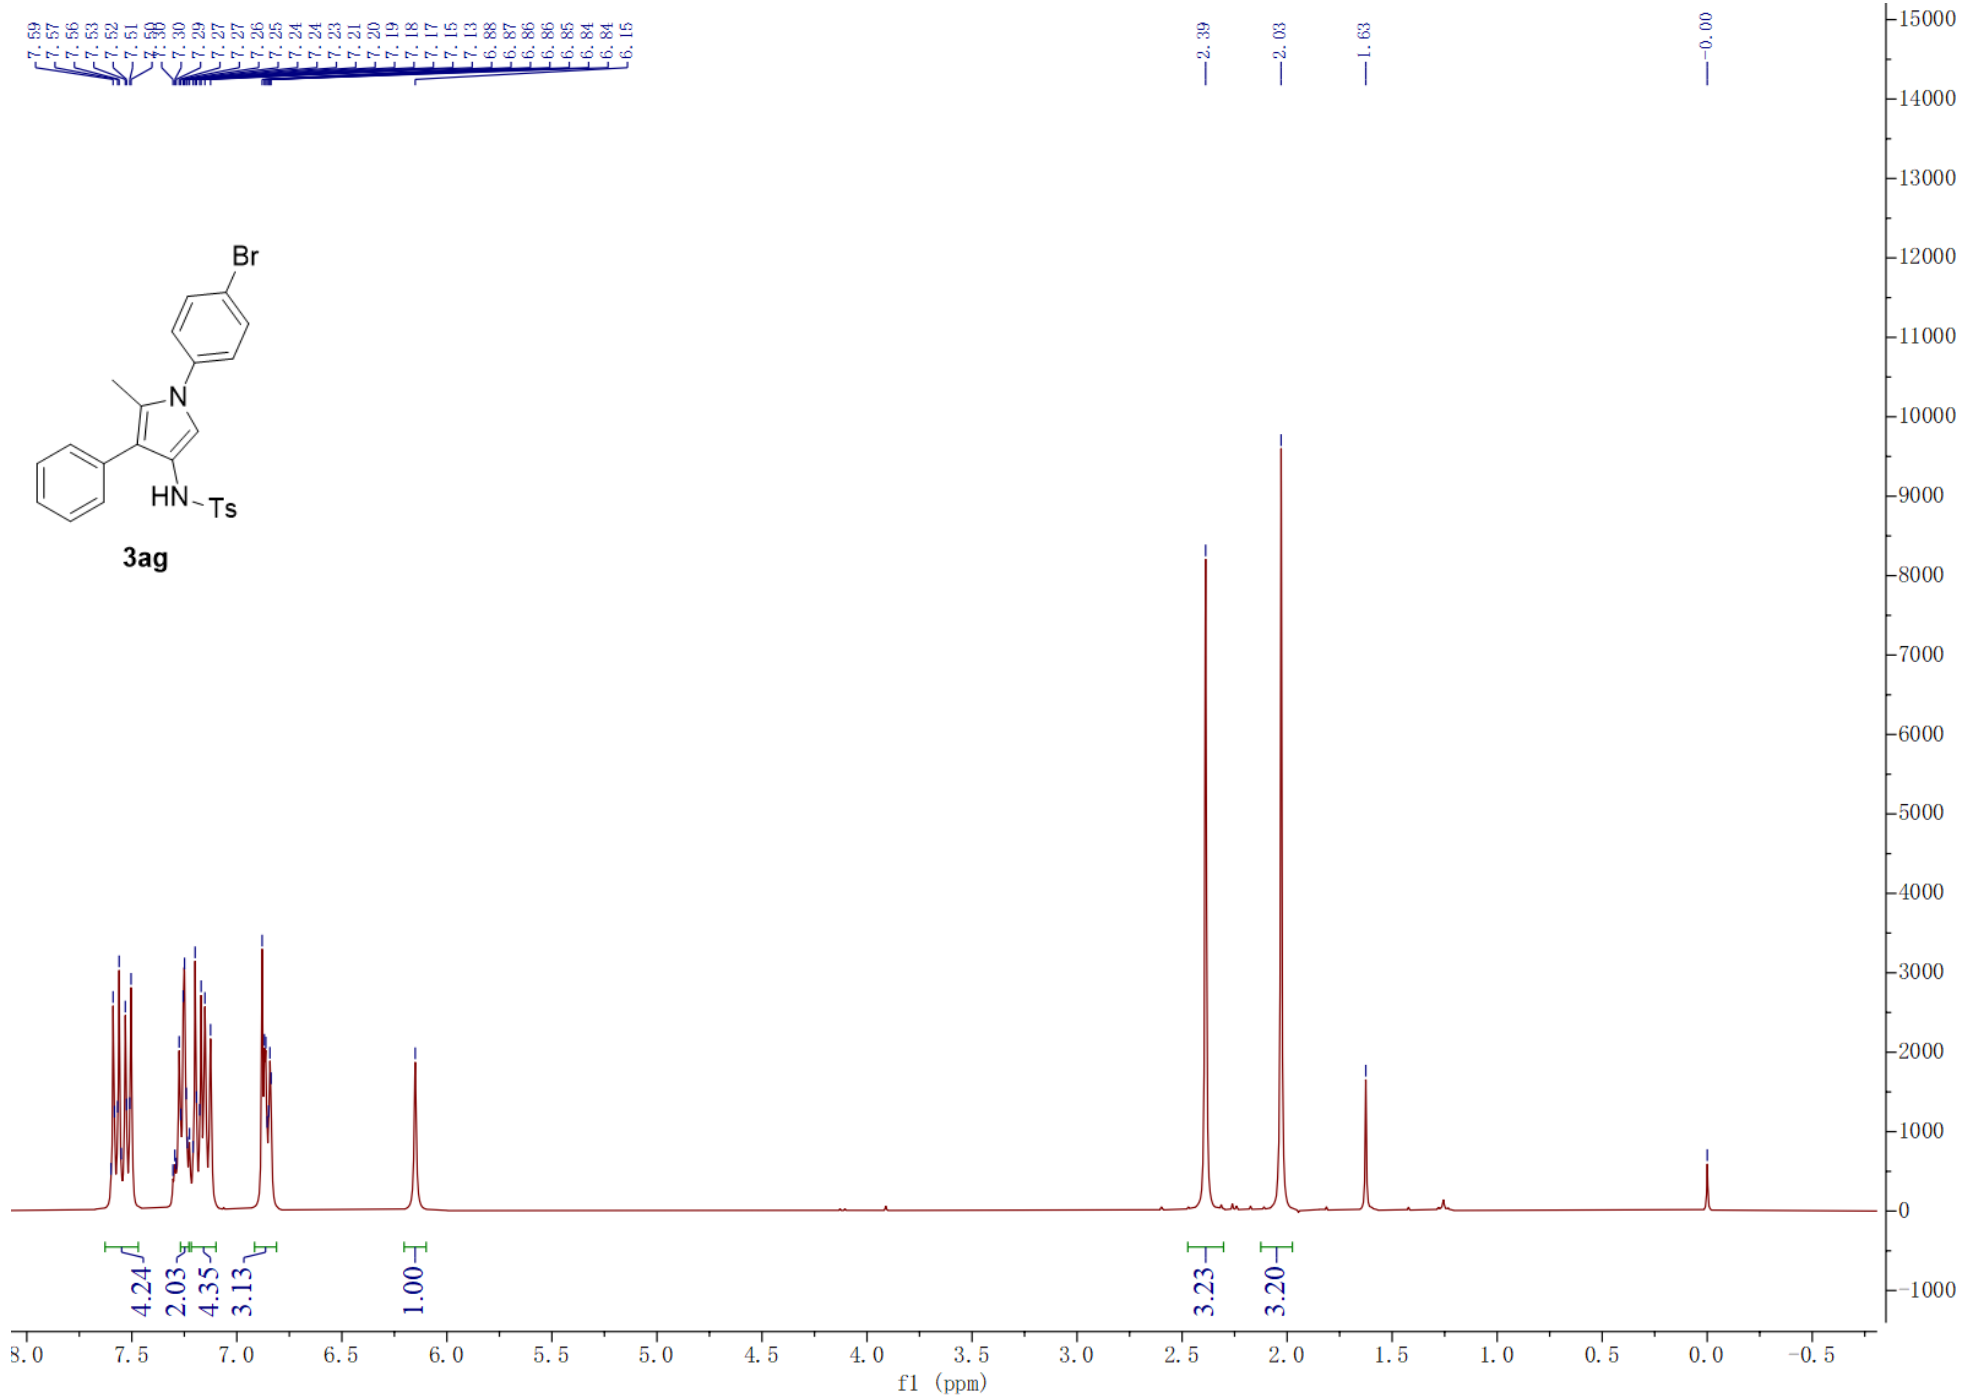

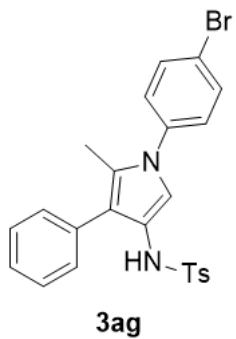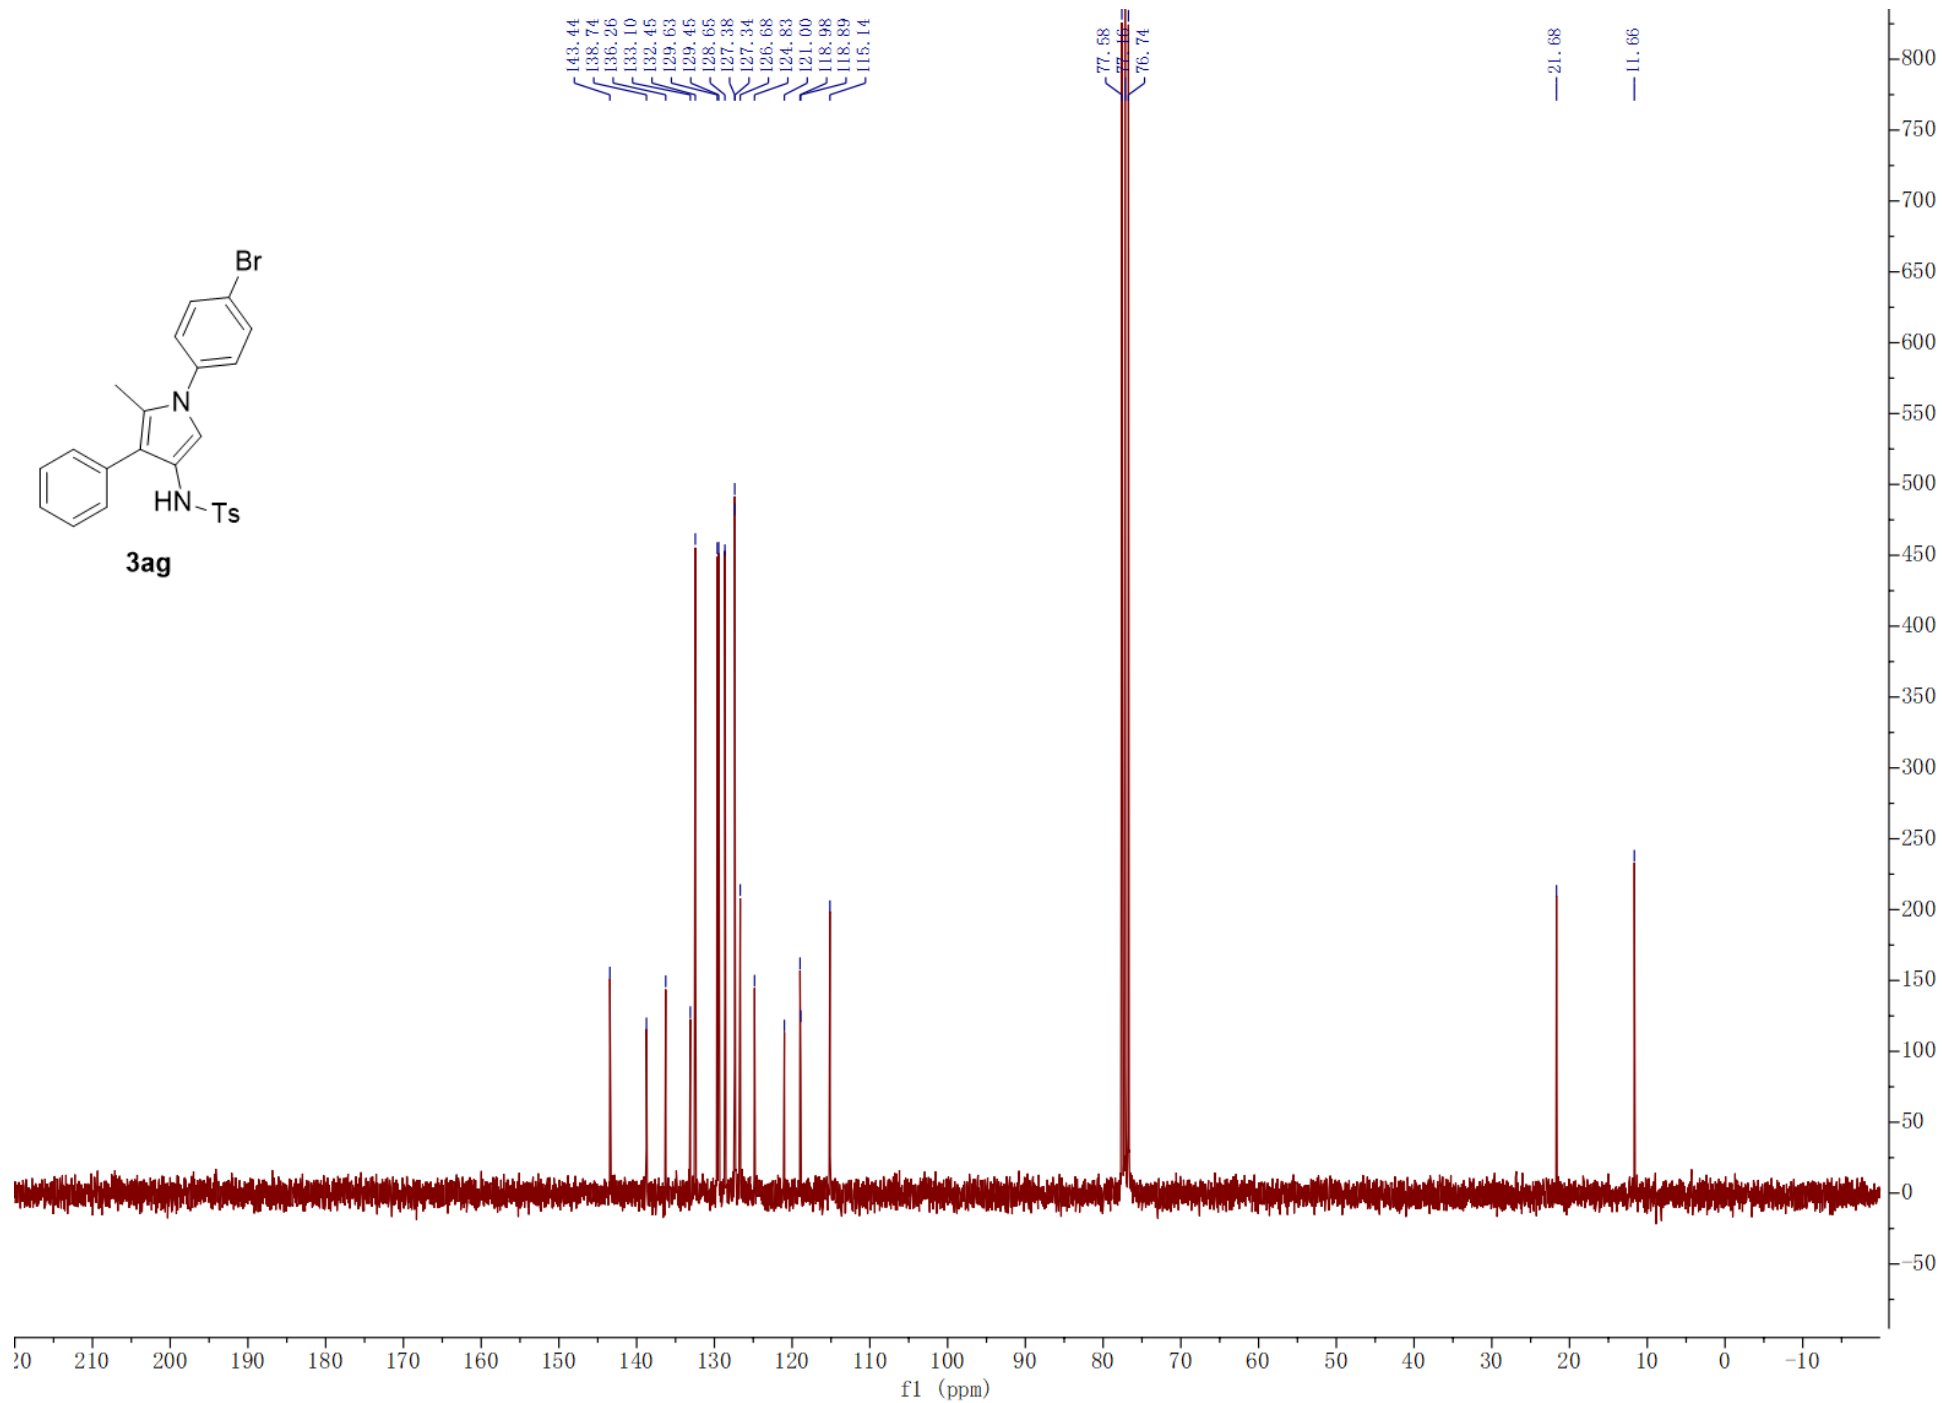



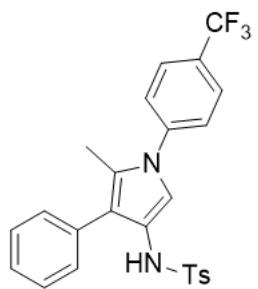

3ah

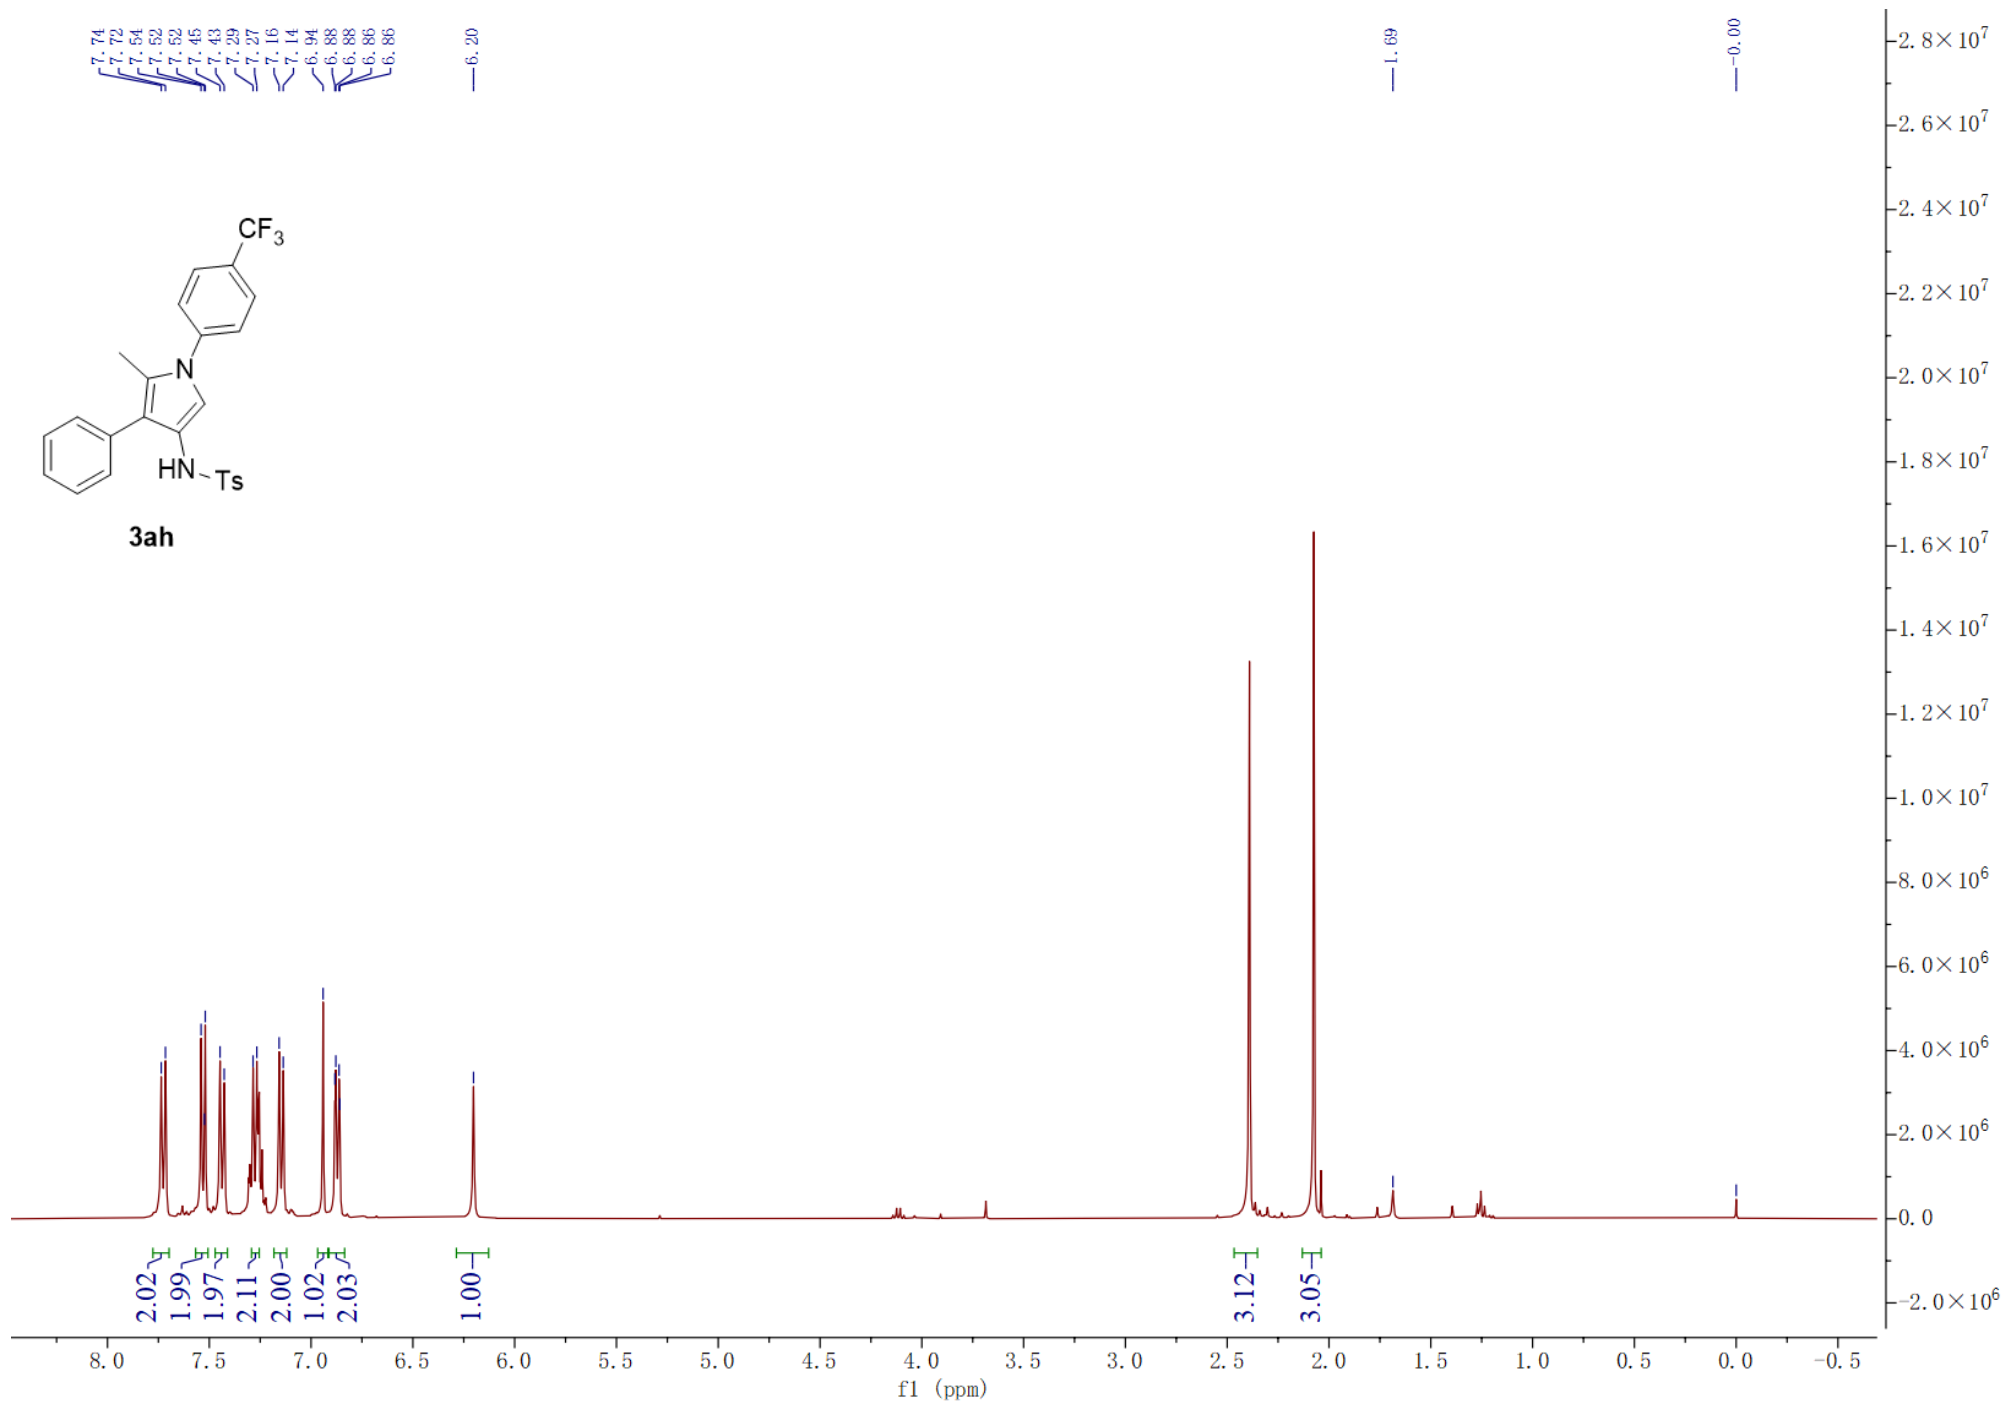

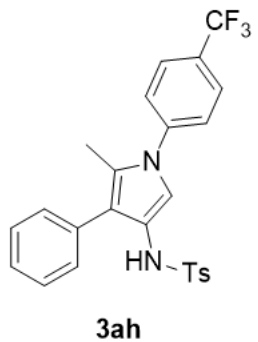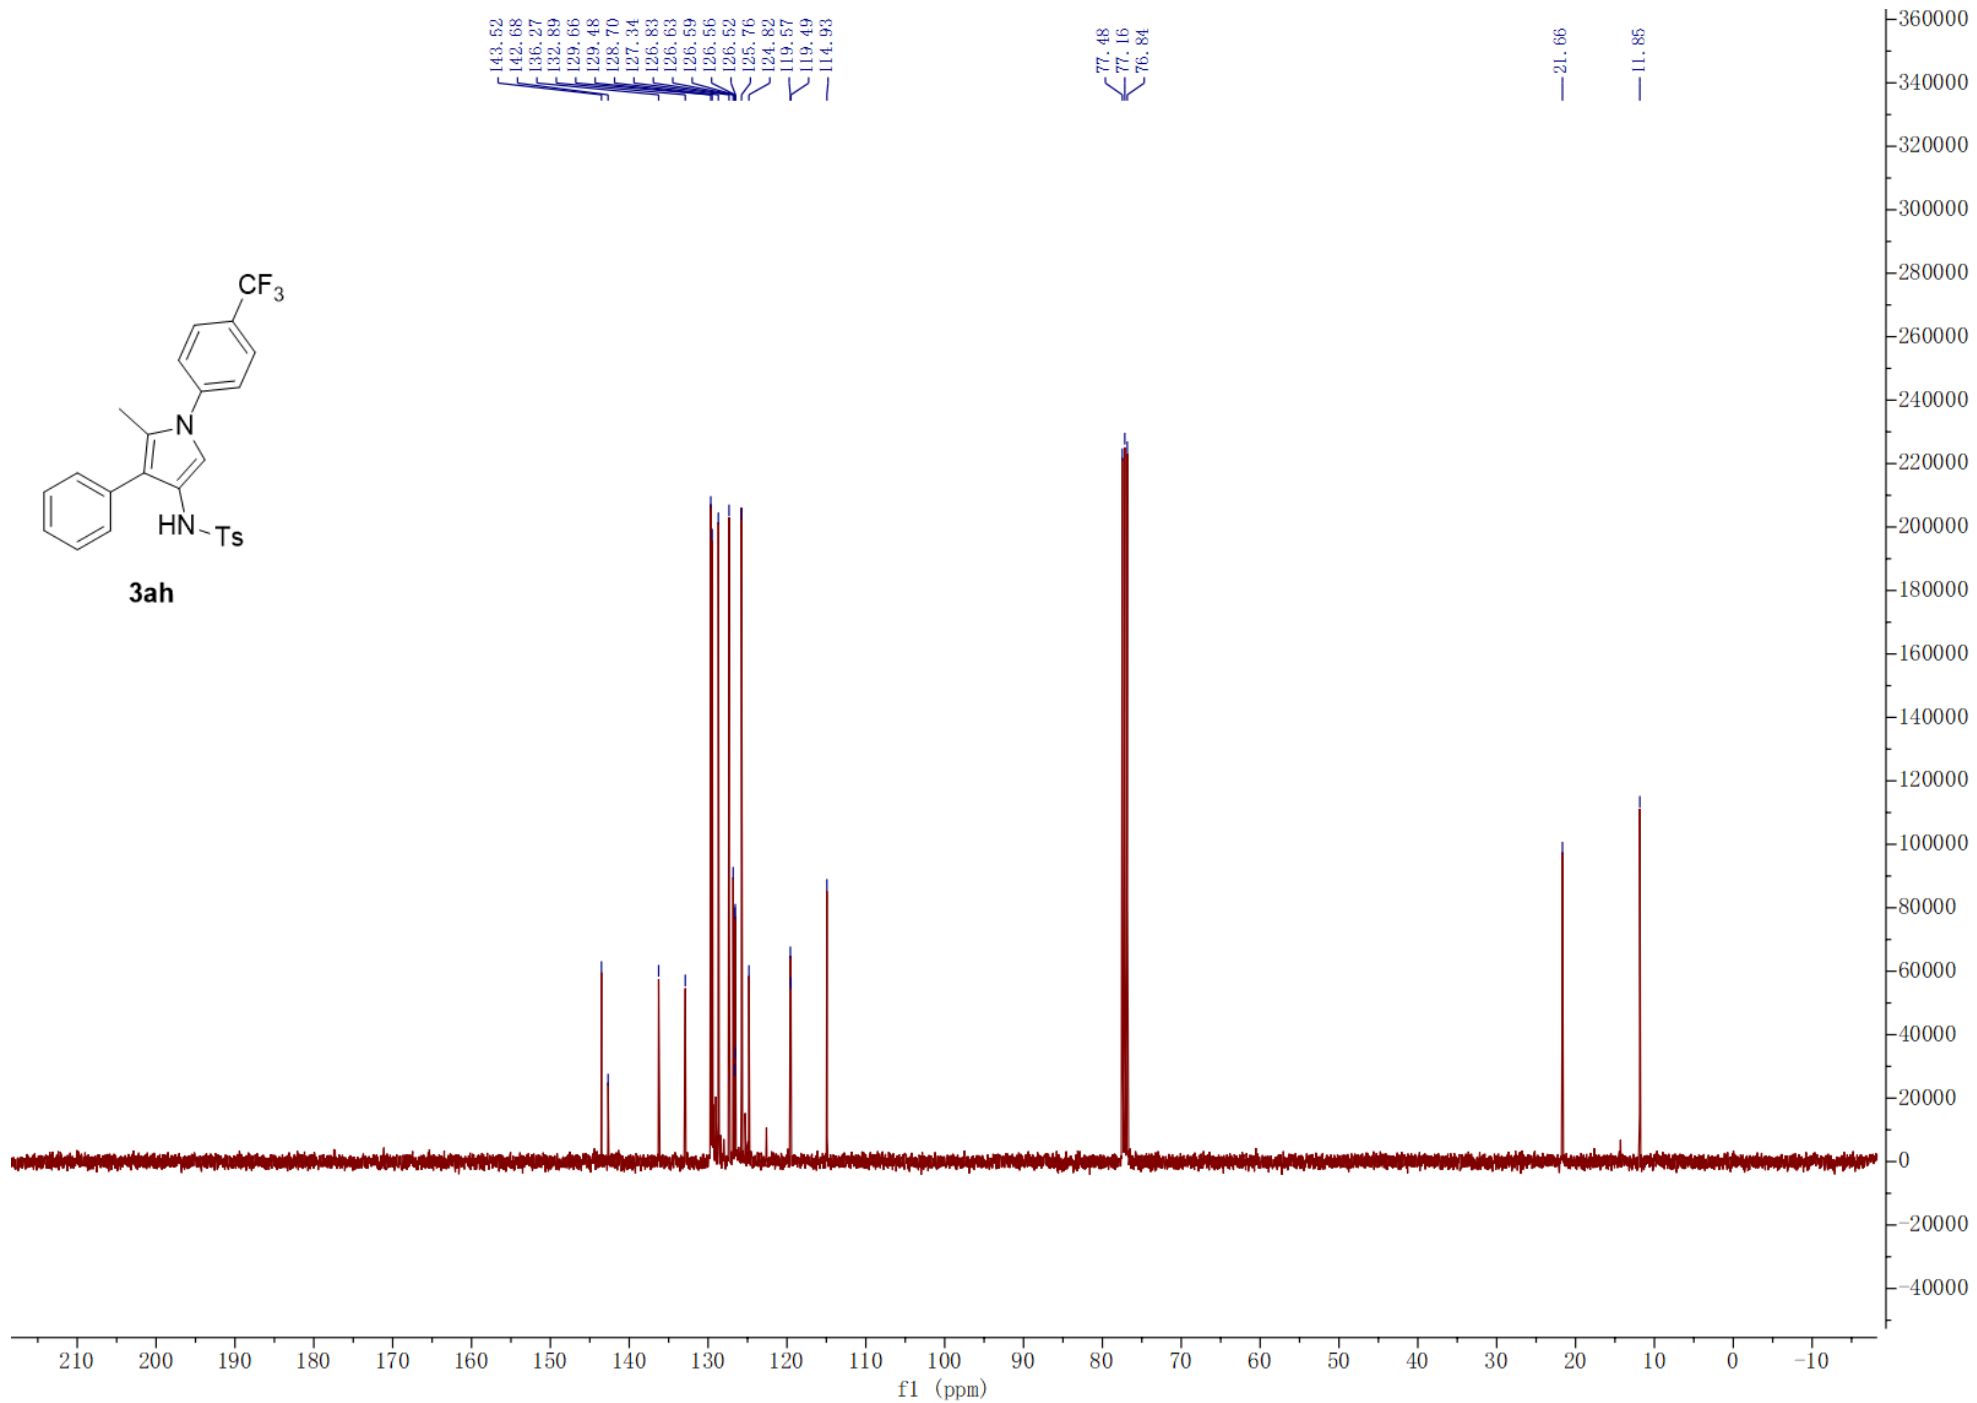

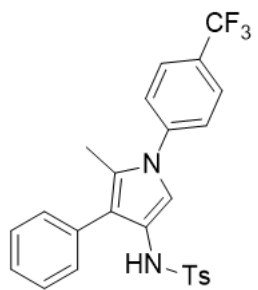

3ah

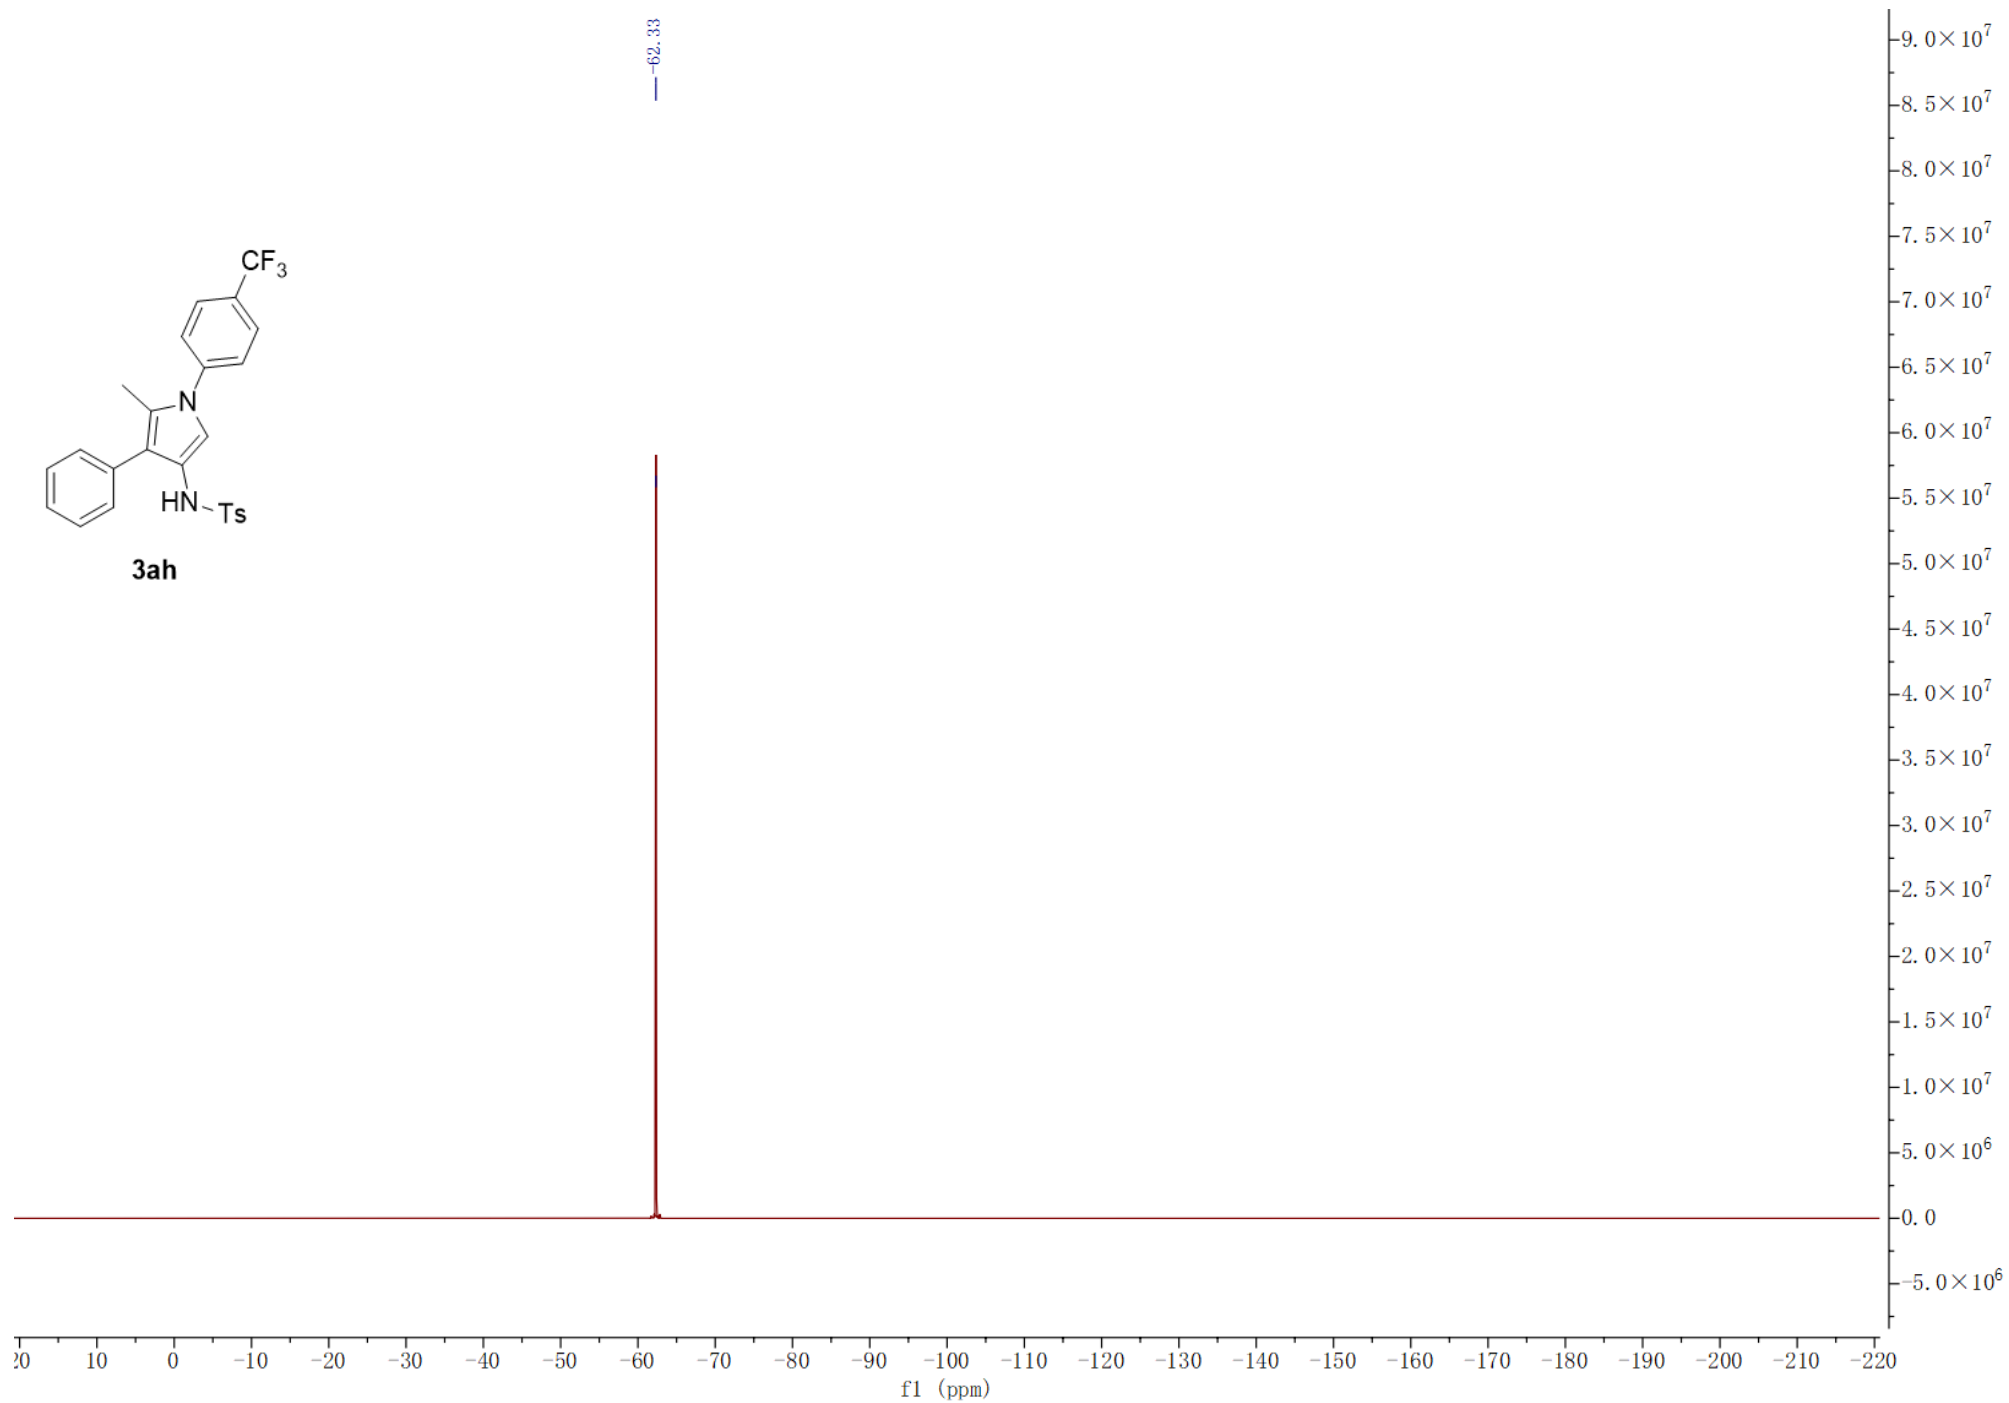

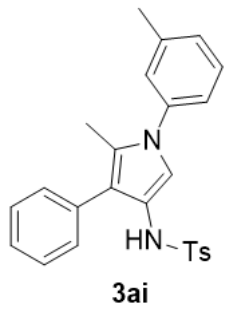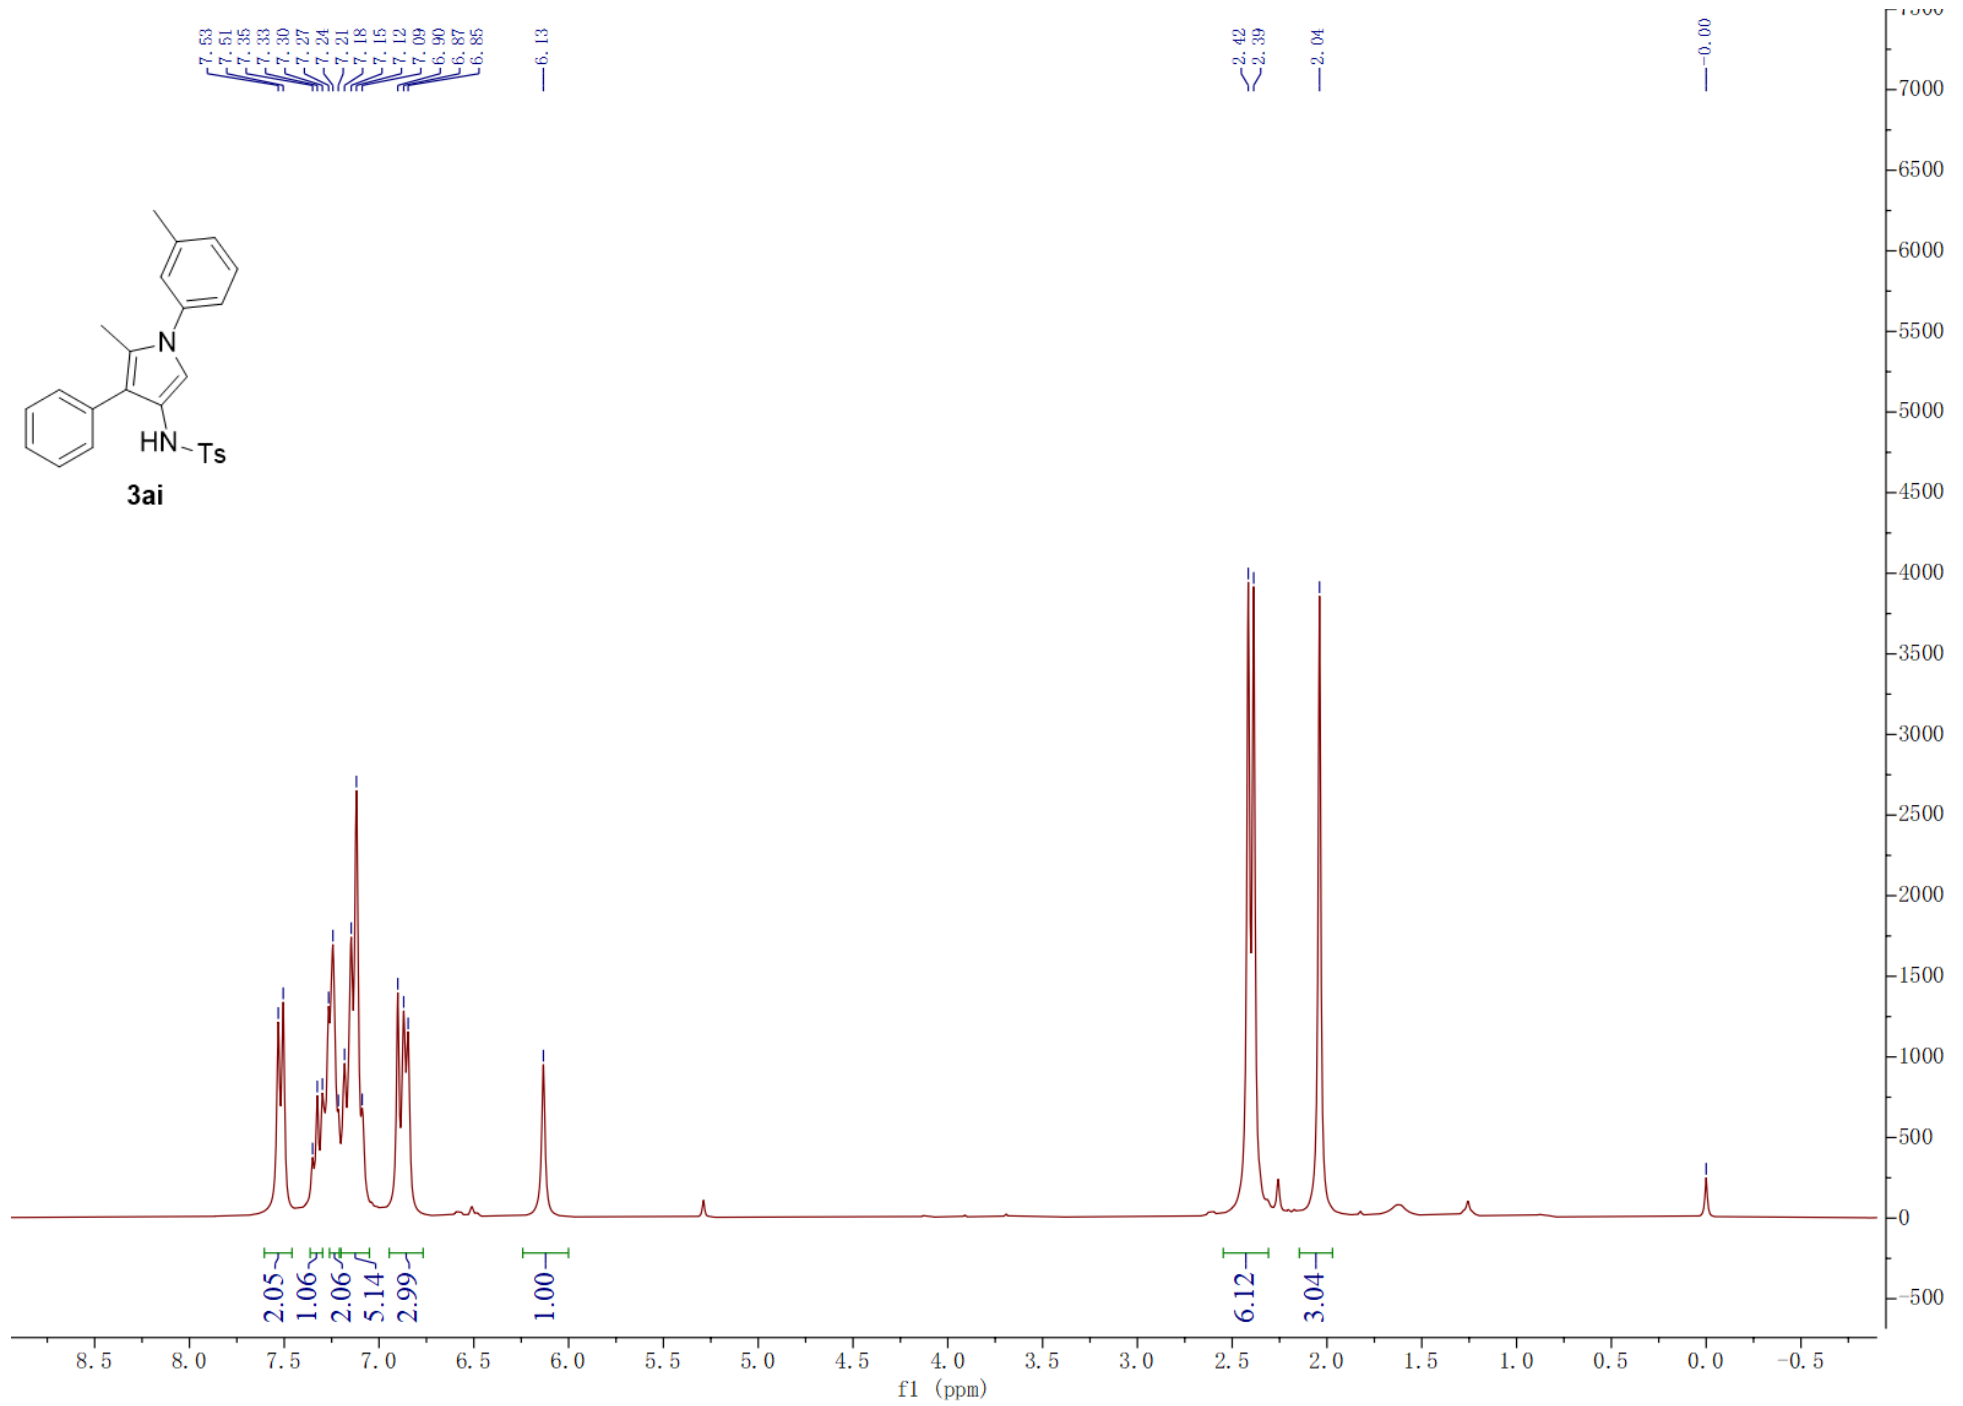

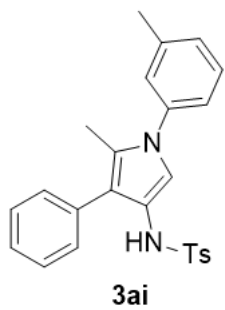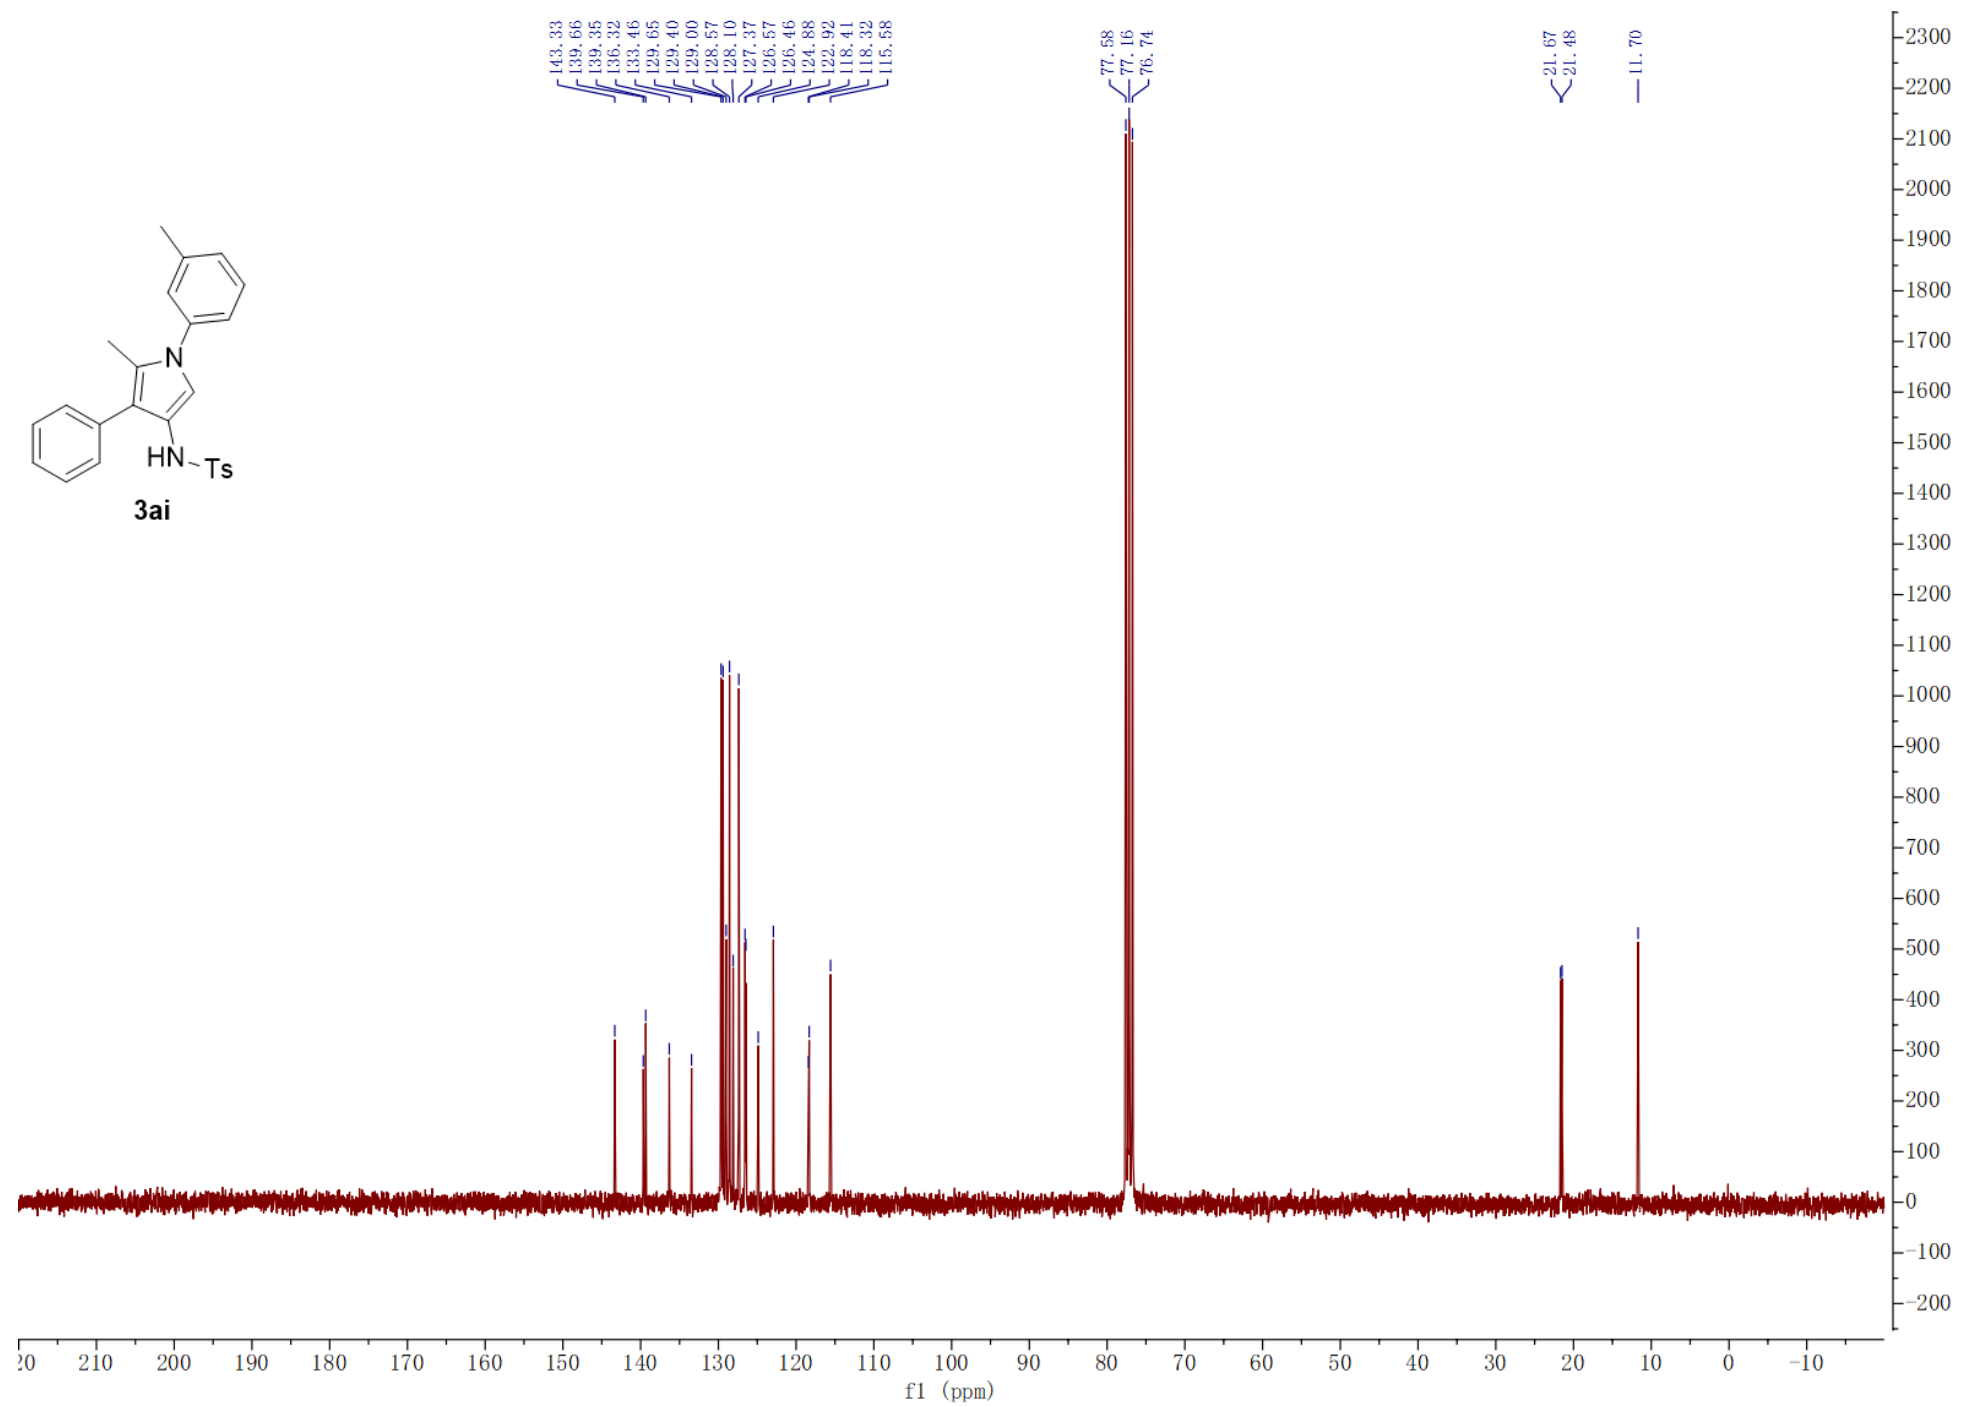

7.53  
7.53  
7.52  
7.51  
7.41  
7.39  
7.37  
7.36  
7.35  
7.35  
7.34  
7.33  
7.33  
7.32  
7.32  
7.30  
7.30  
7.29  
7.28  
7.27  
7.23  
7.22  
7.22  
7.21  
7.20  
7.20  
7.16  
7.14

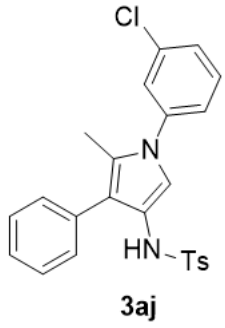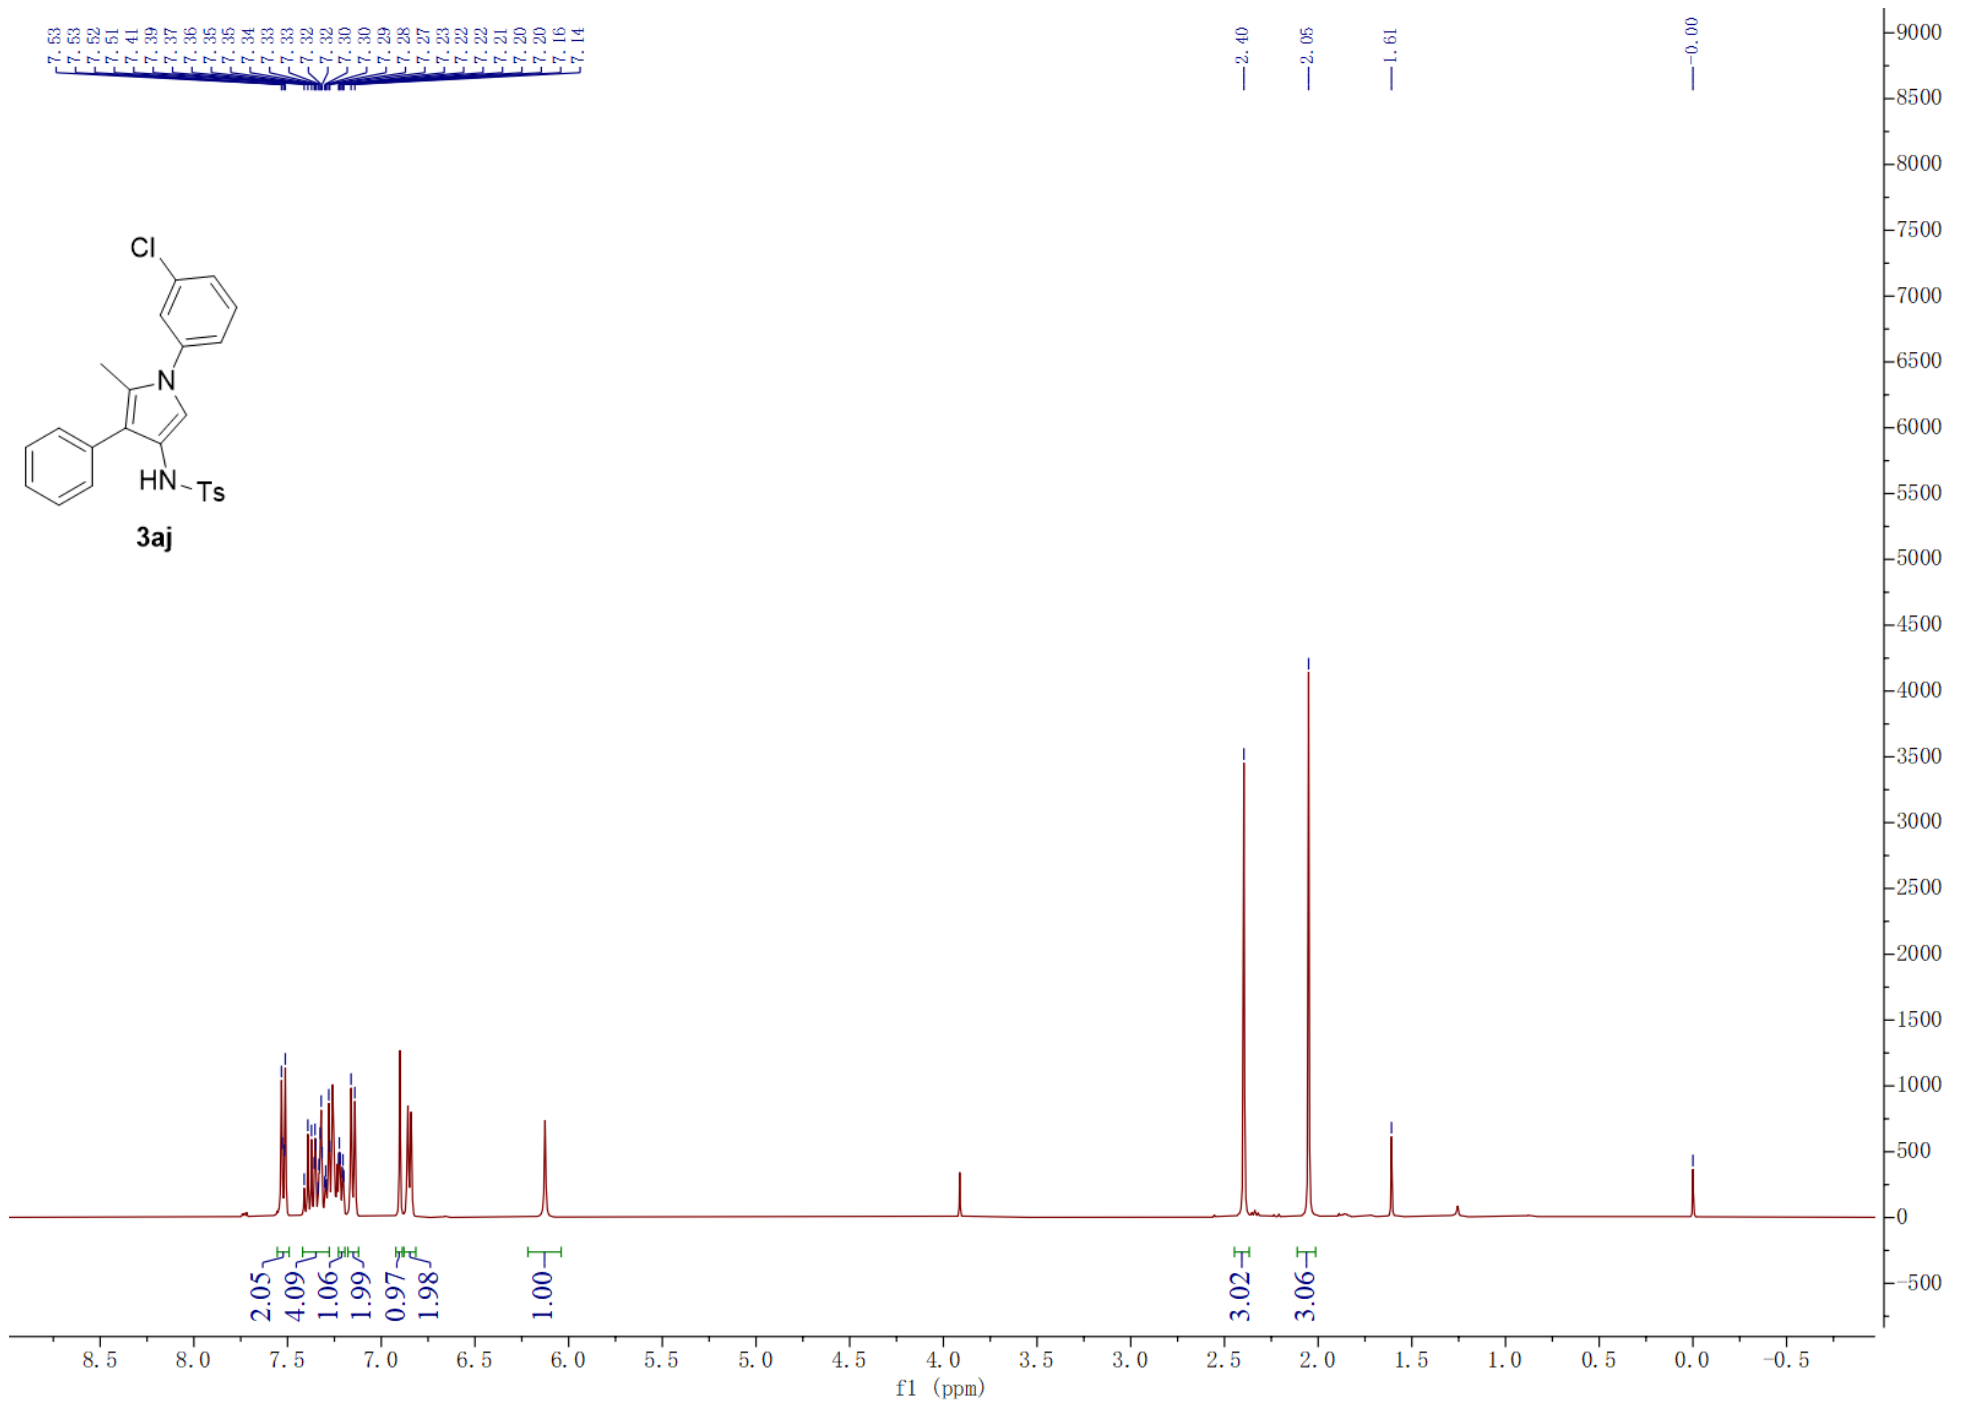

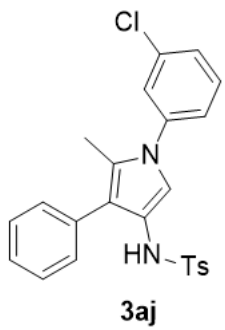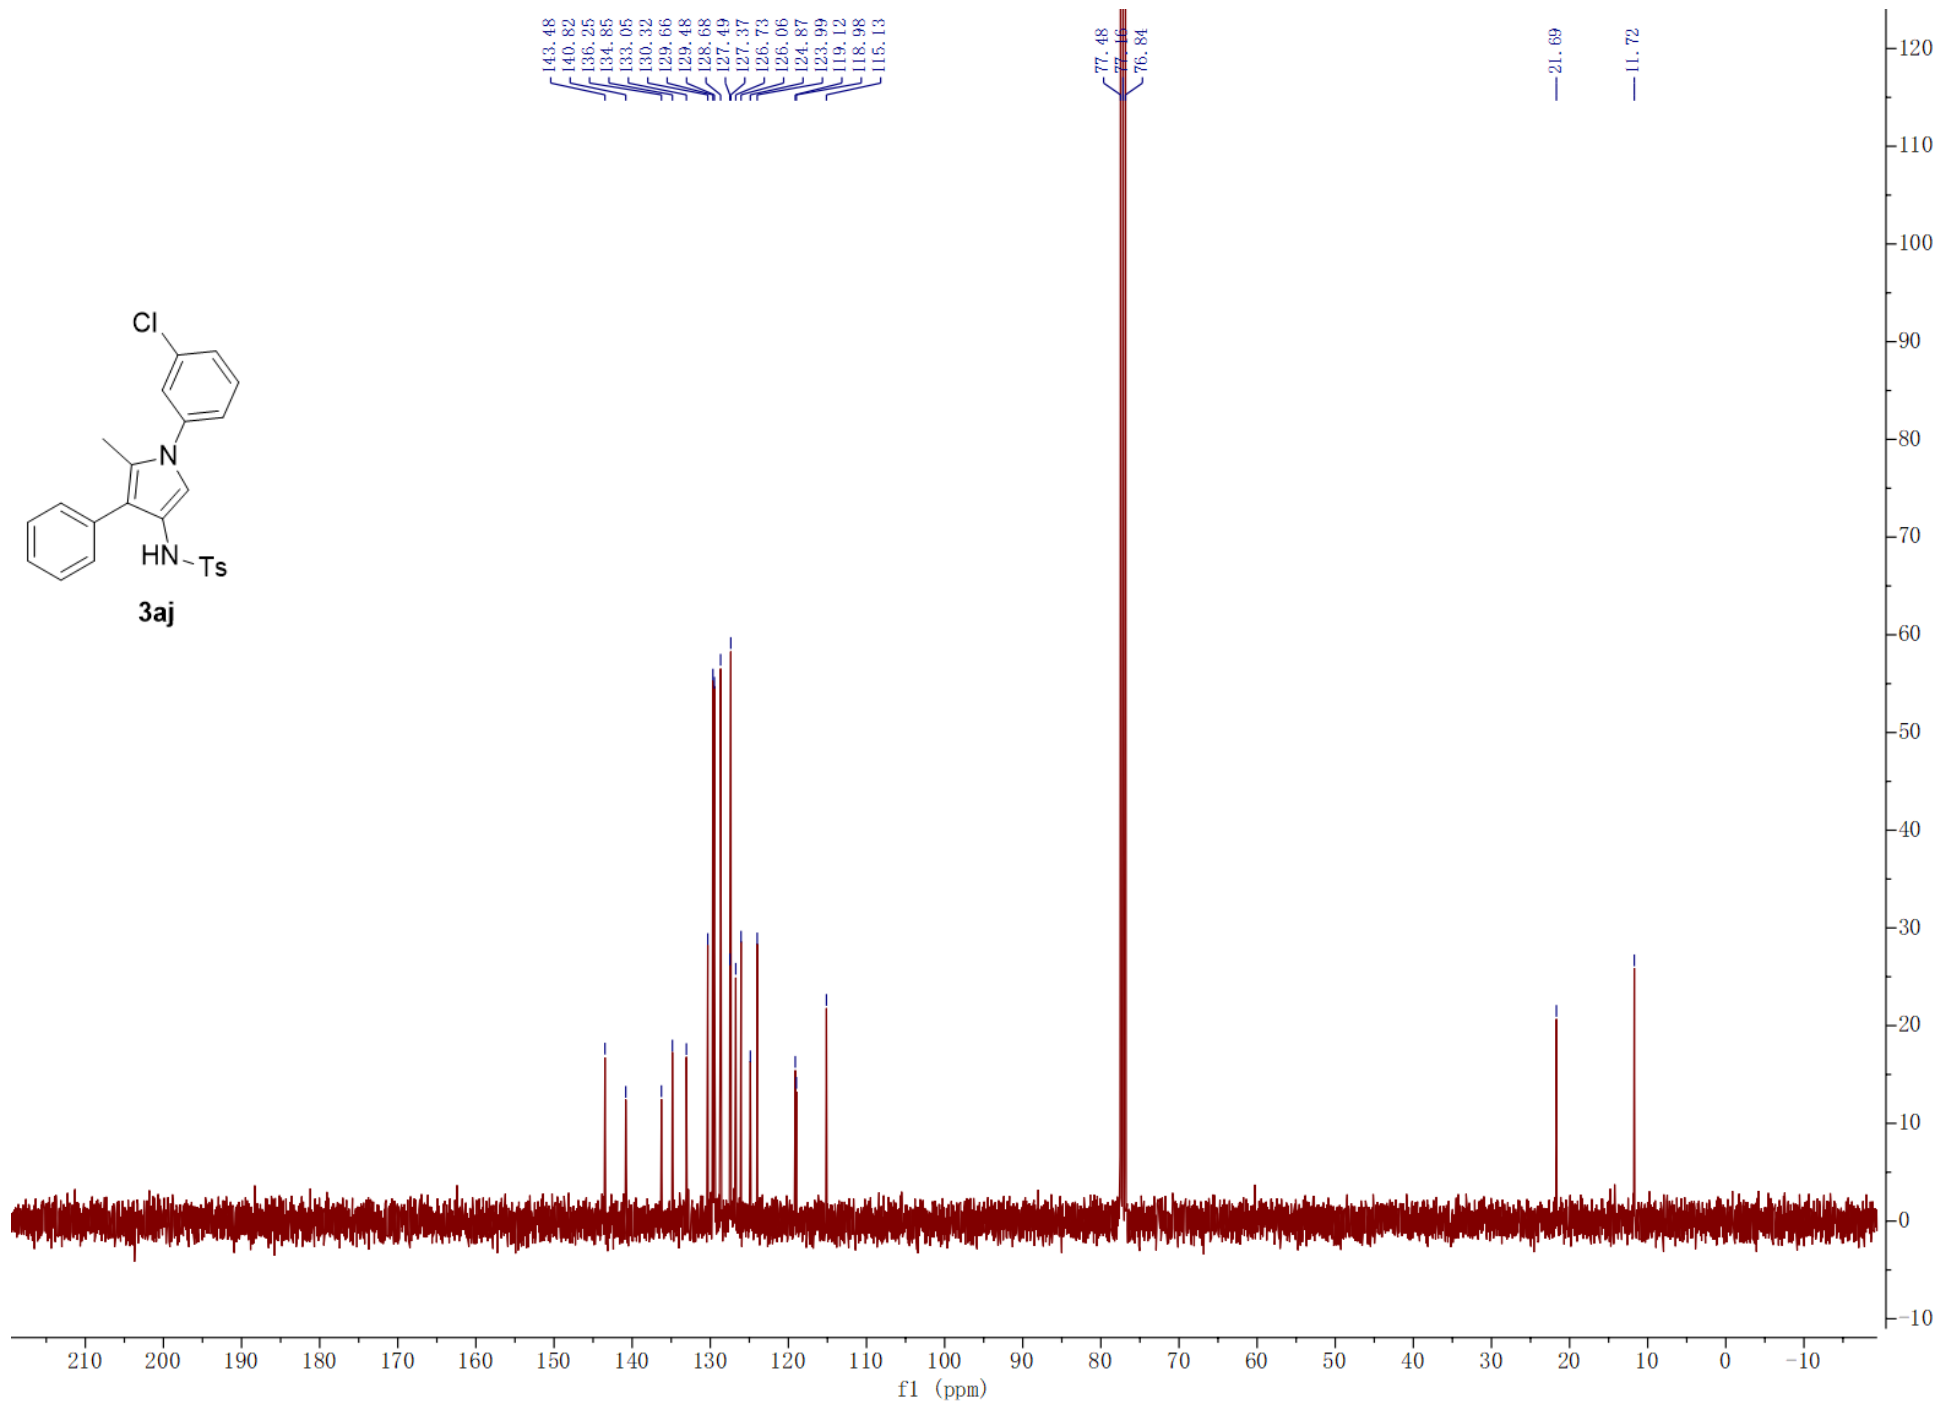

7.53  
7.51  
7.51  
7.49  
7.49  
7.48  
7.48  
7.33  
7.28  
7.28  
7.26  
7.26  
7.17  
7.17  
6.96  
6.96  
6.86  
6.86  
6.84  
6.84

6.10

2.40

2.05

1.59

-0.00

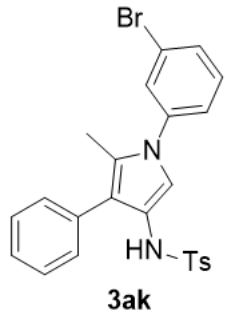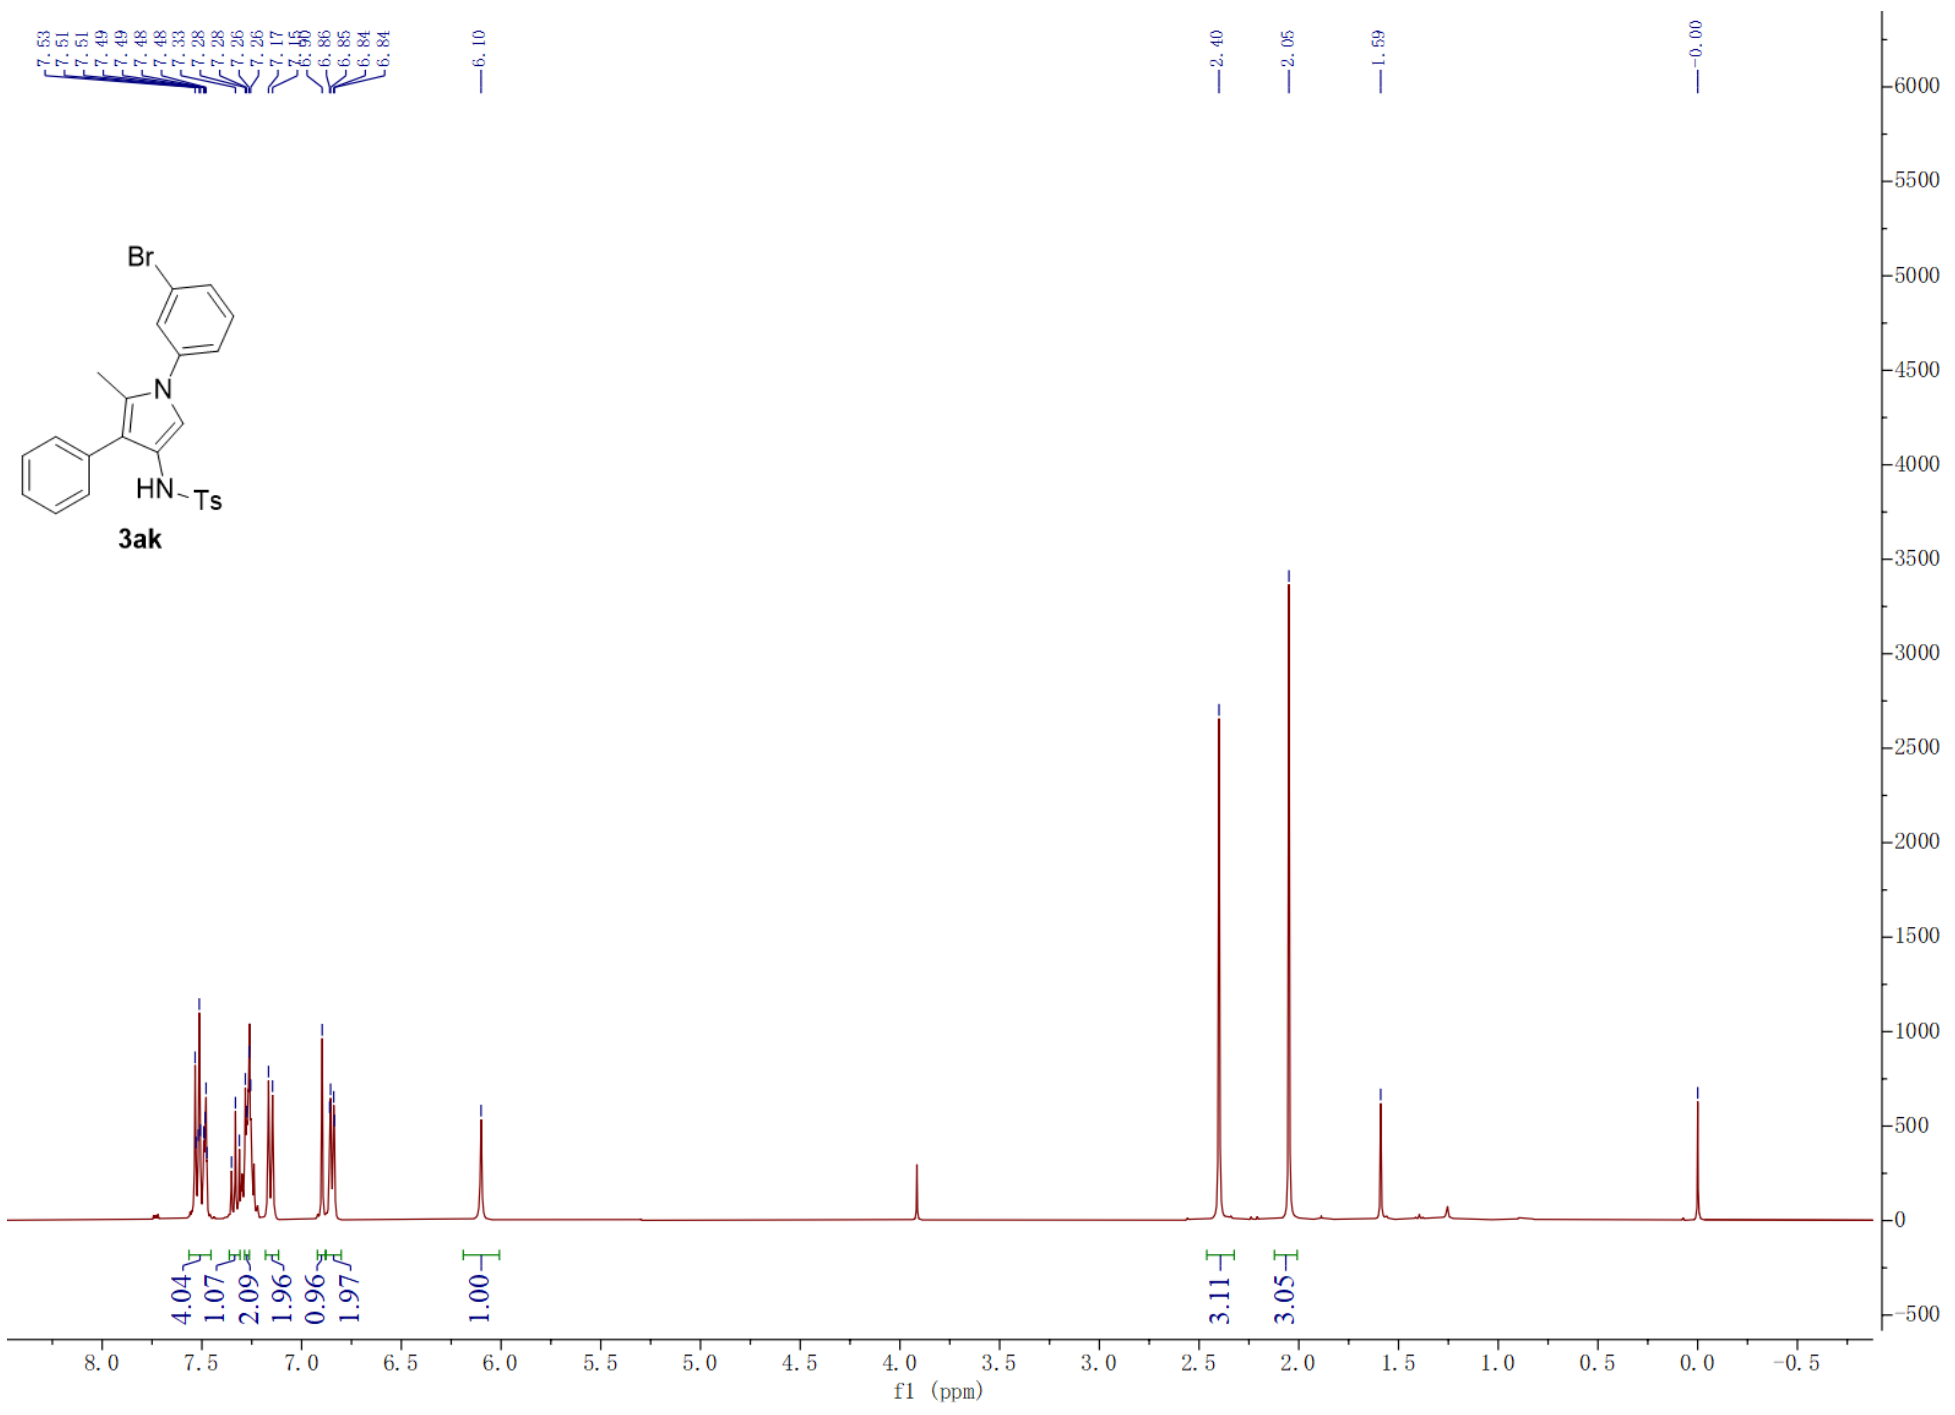



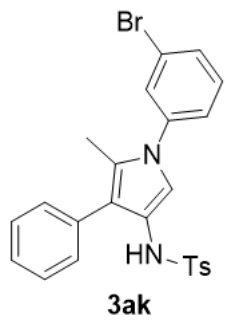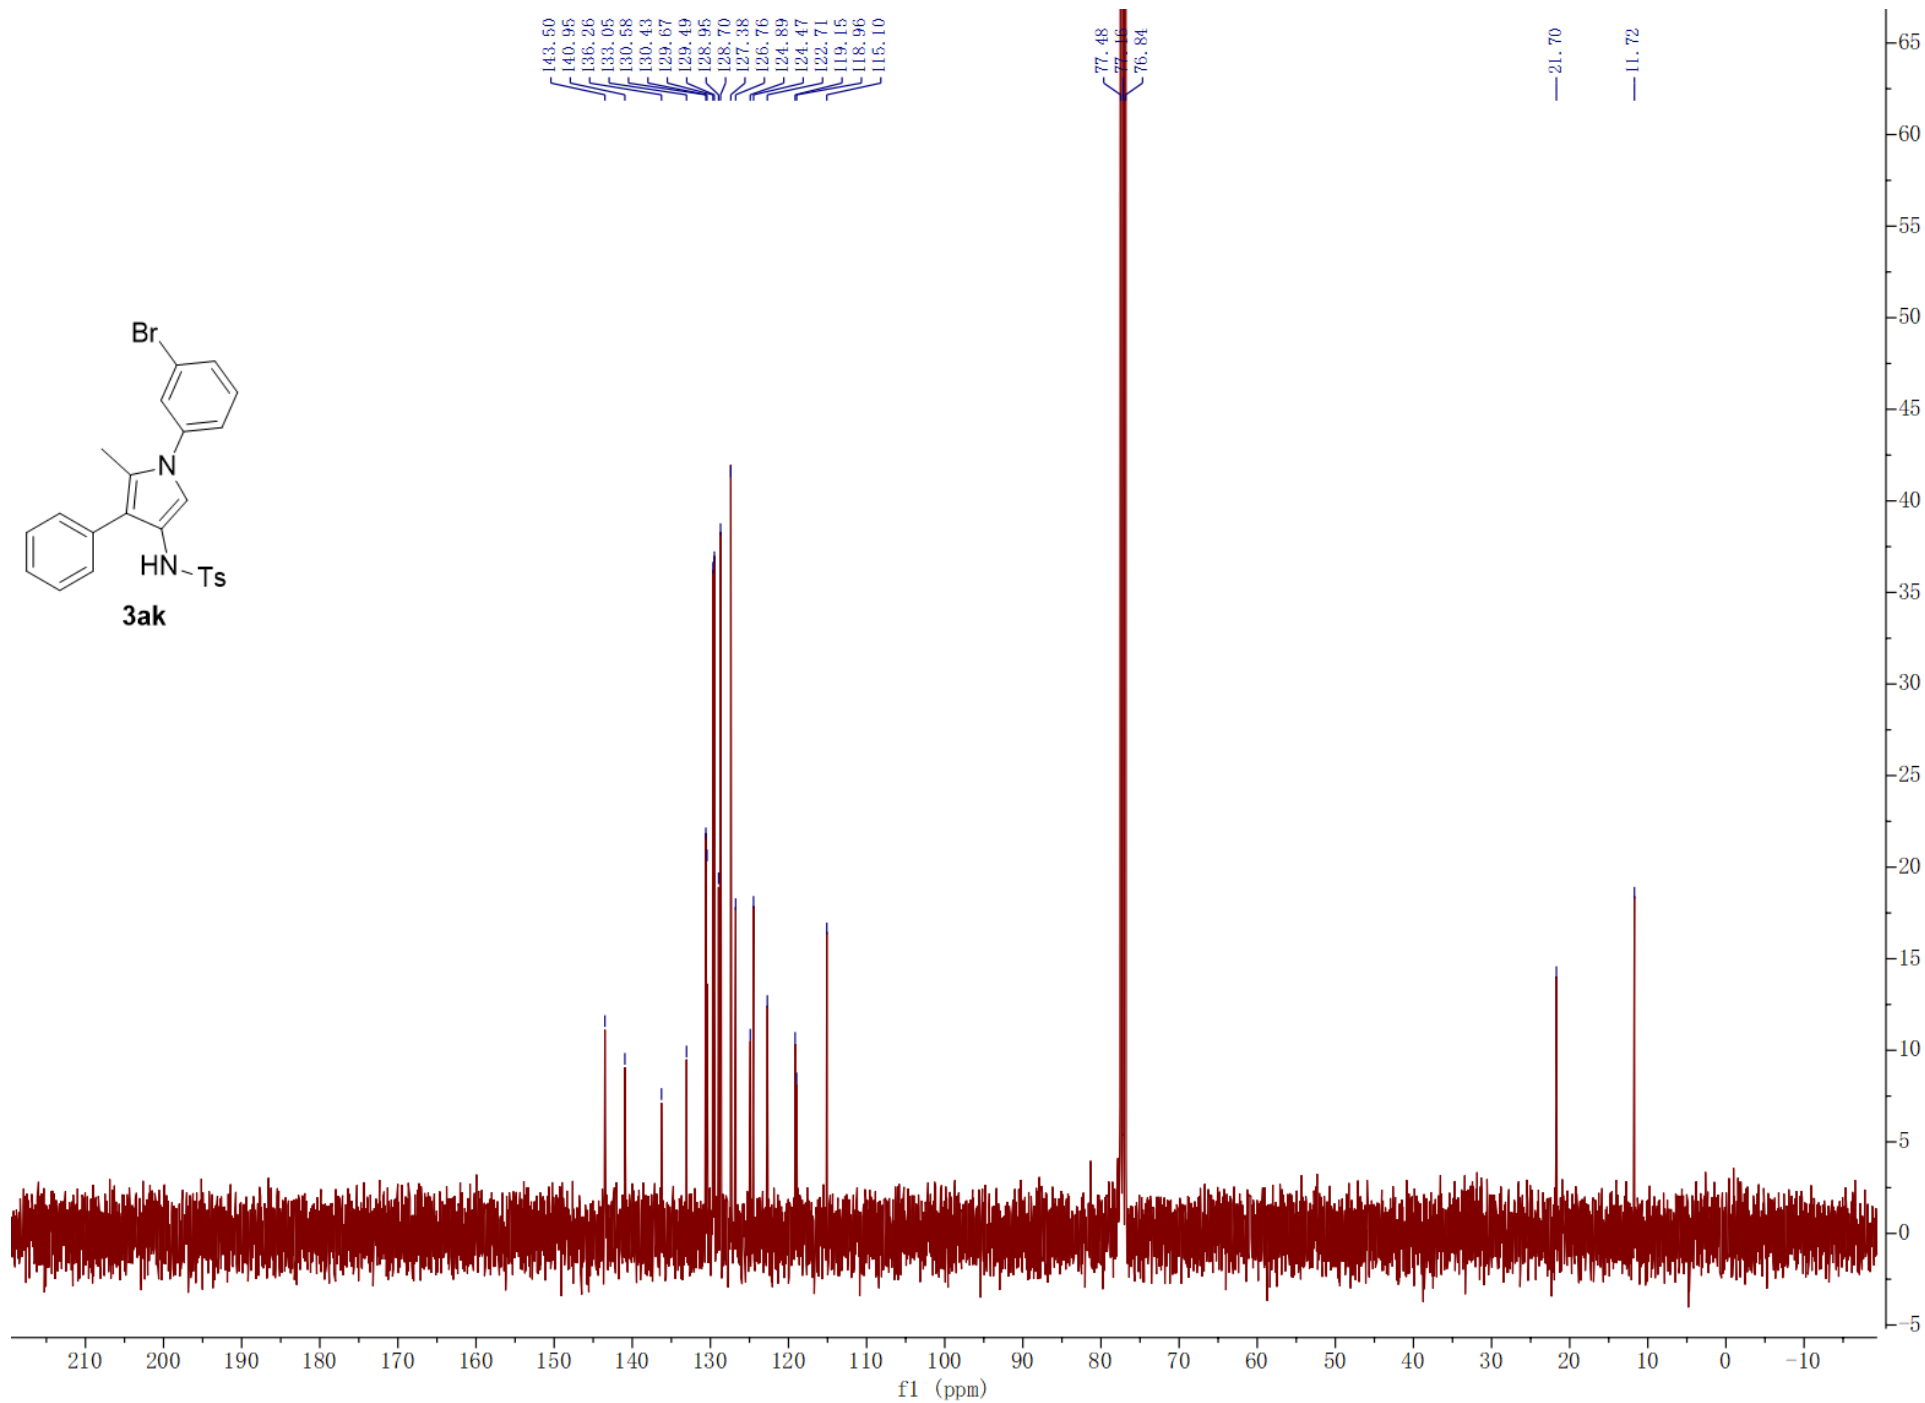

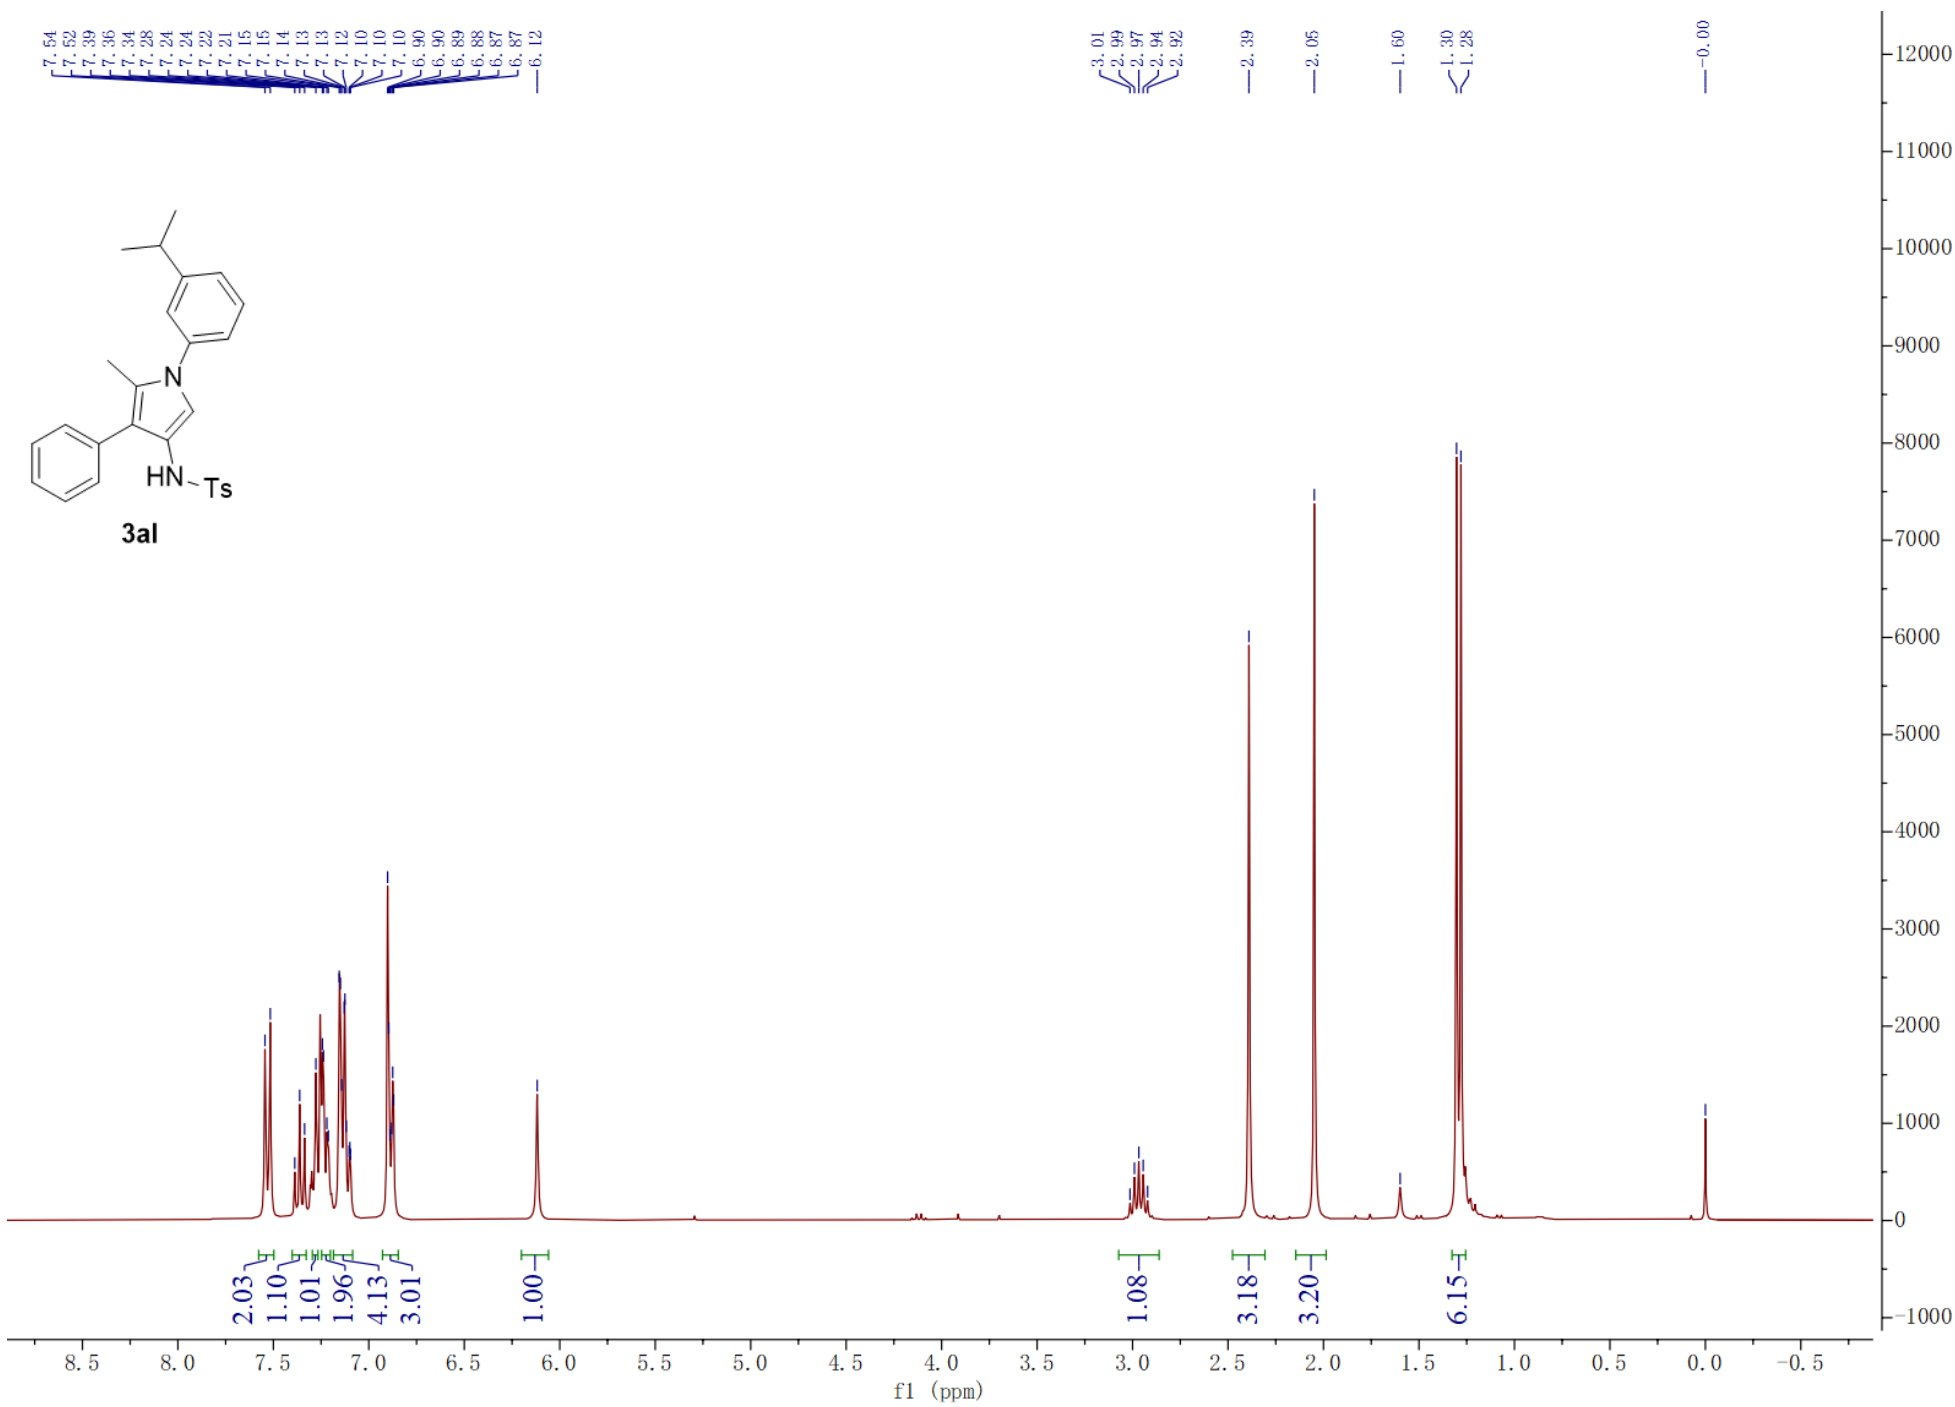

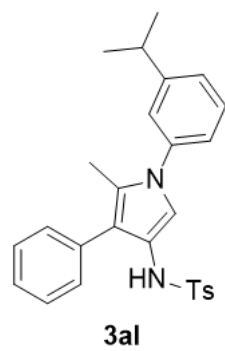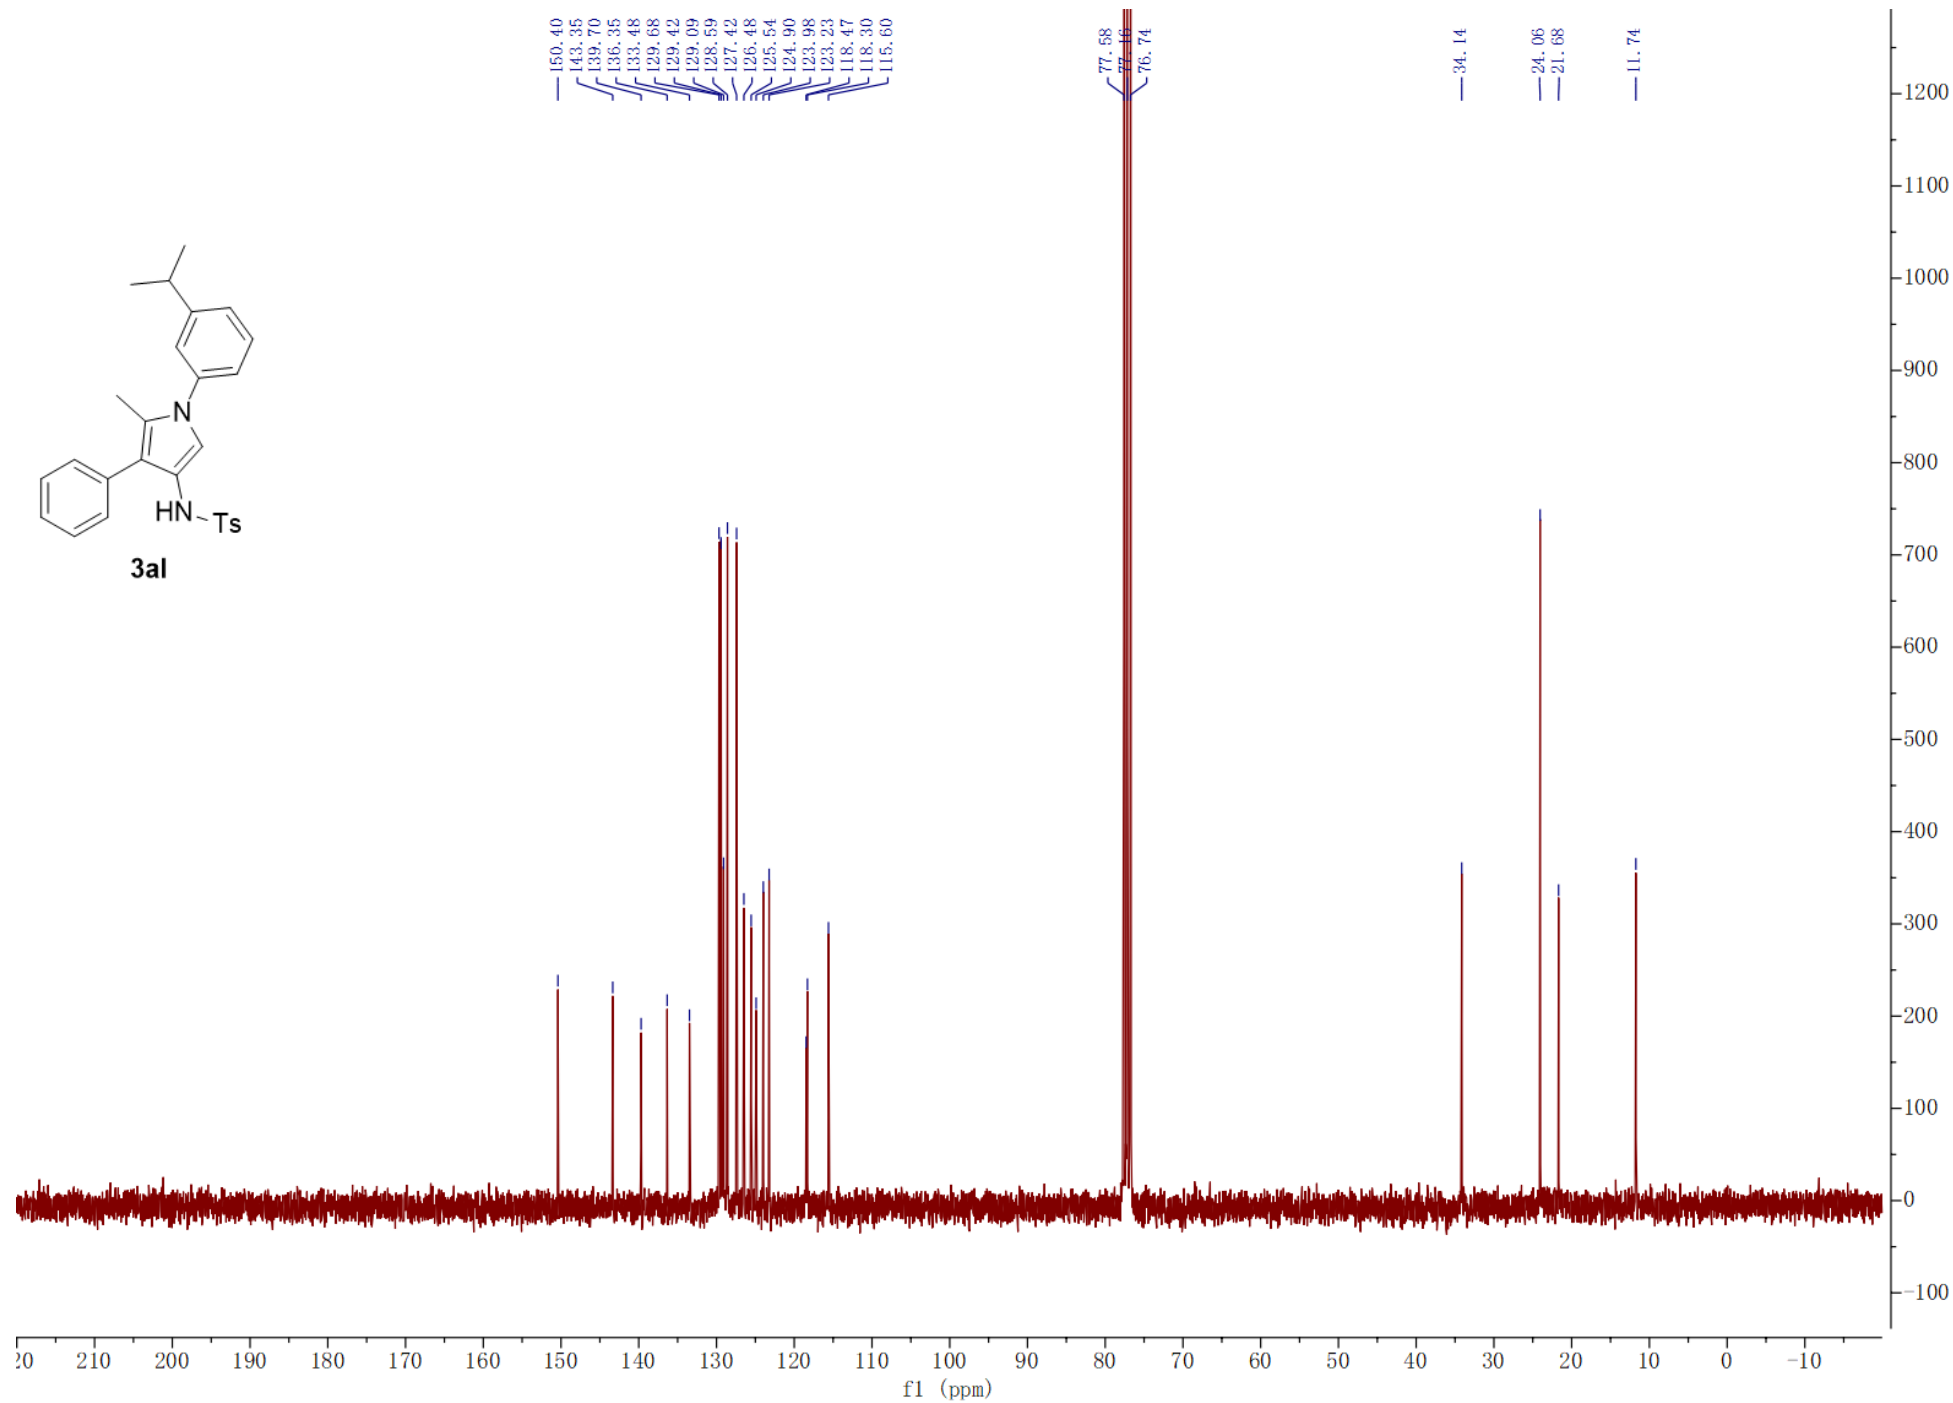

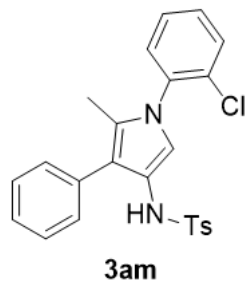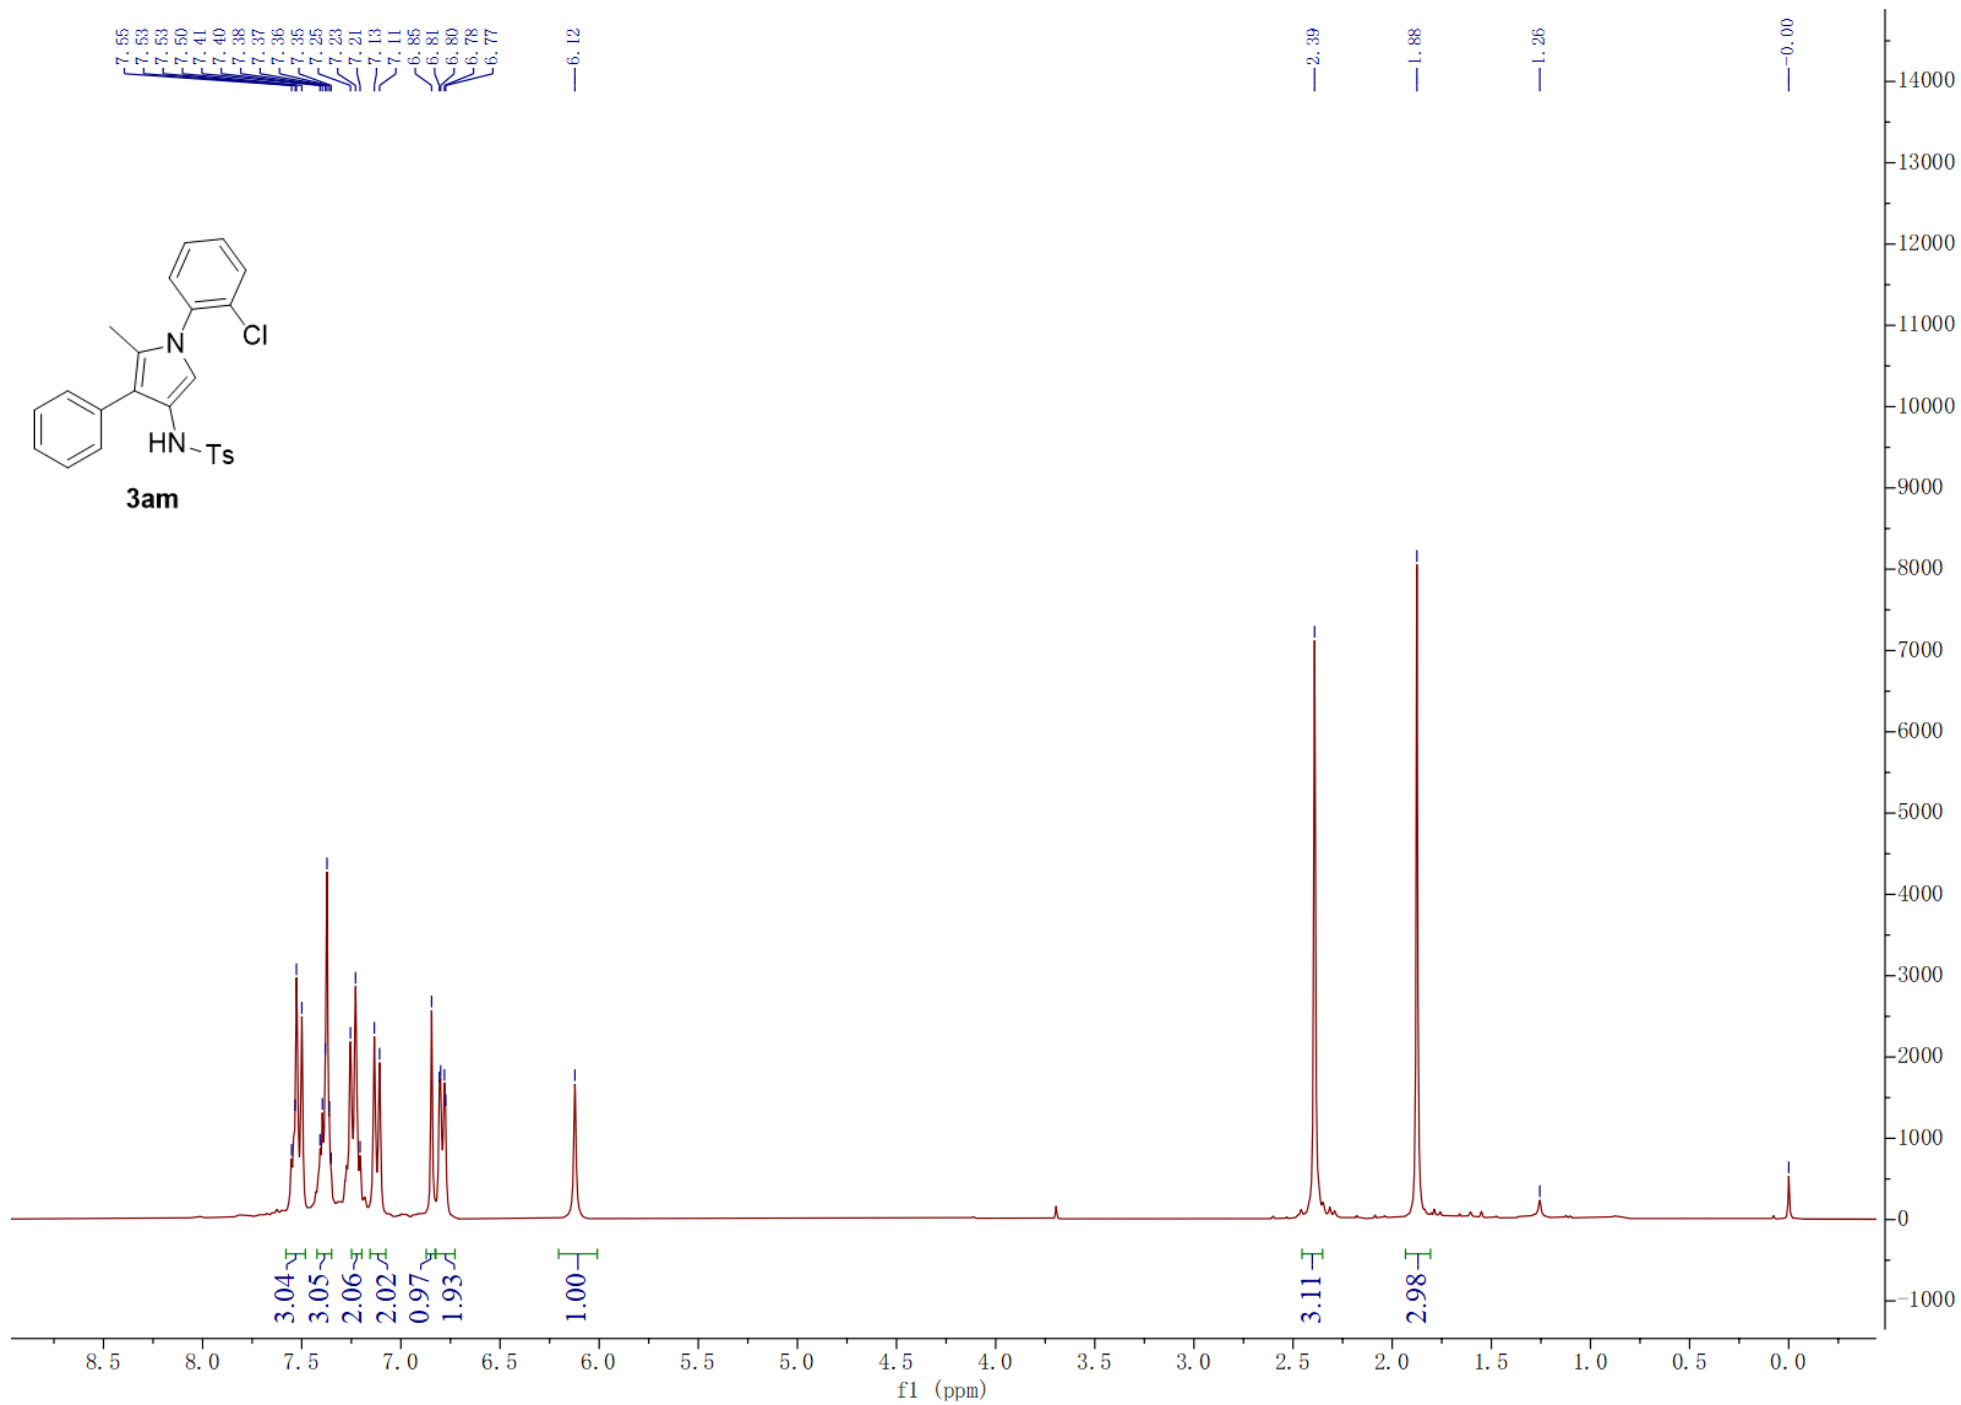

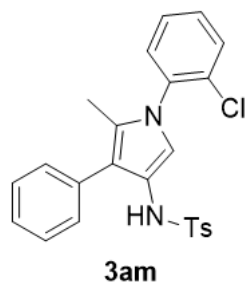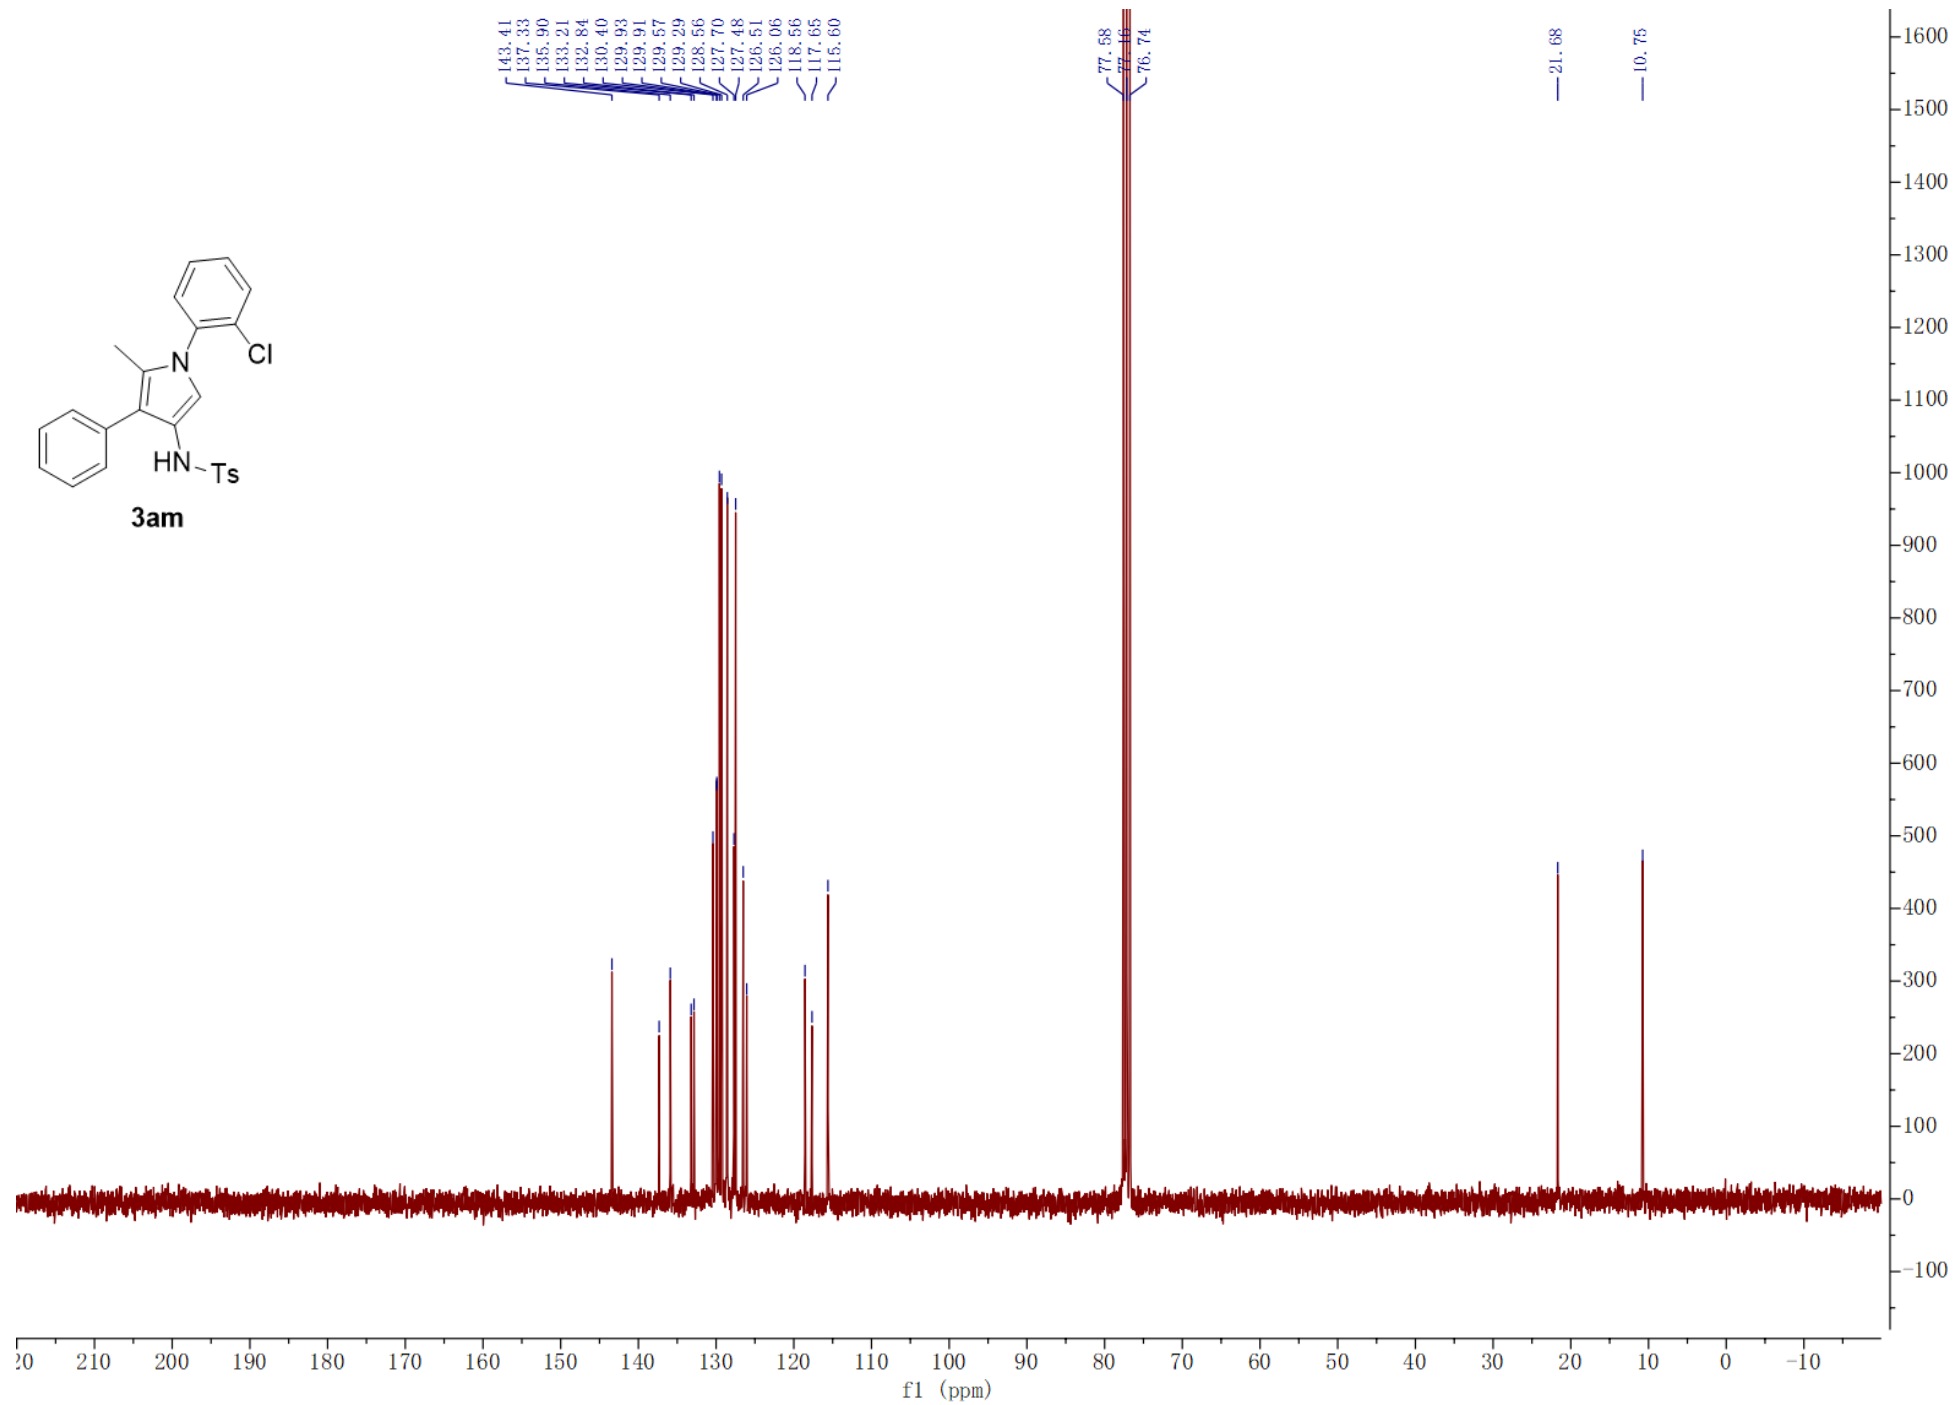

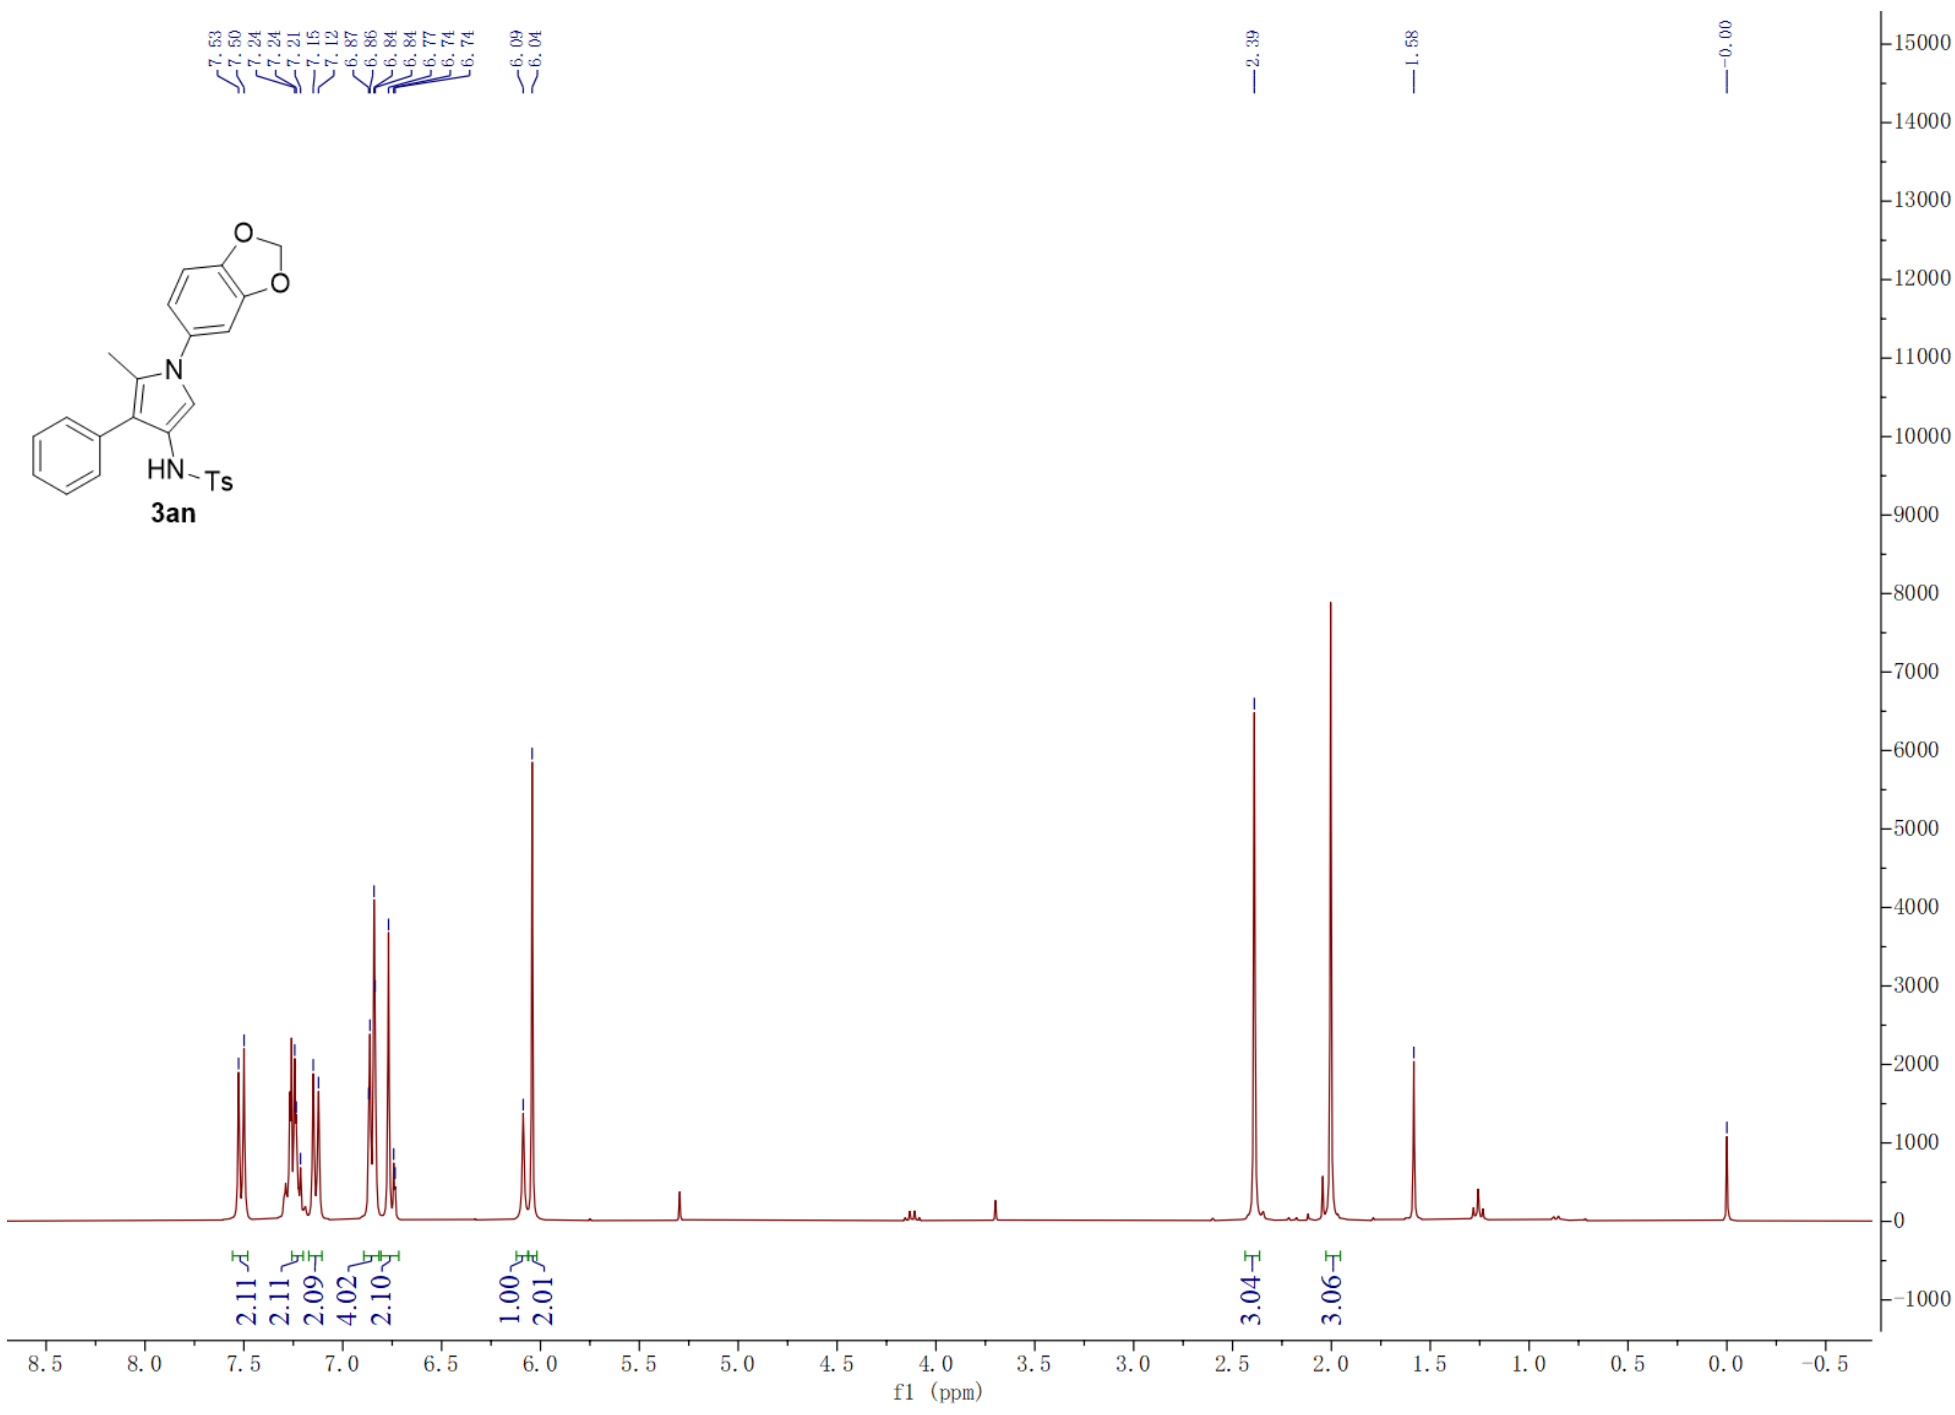

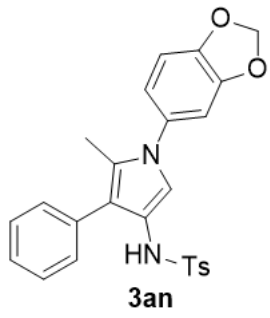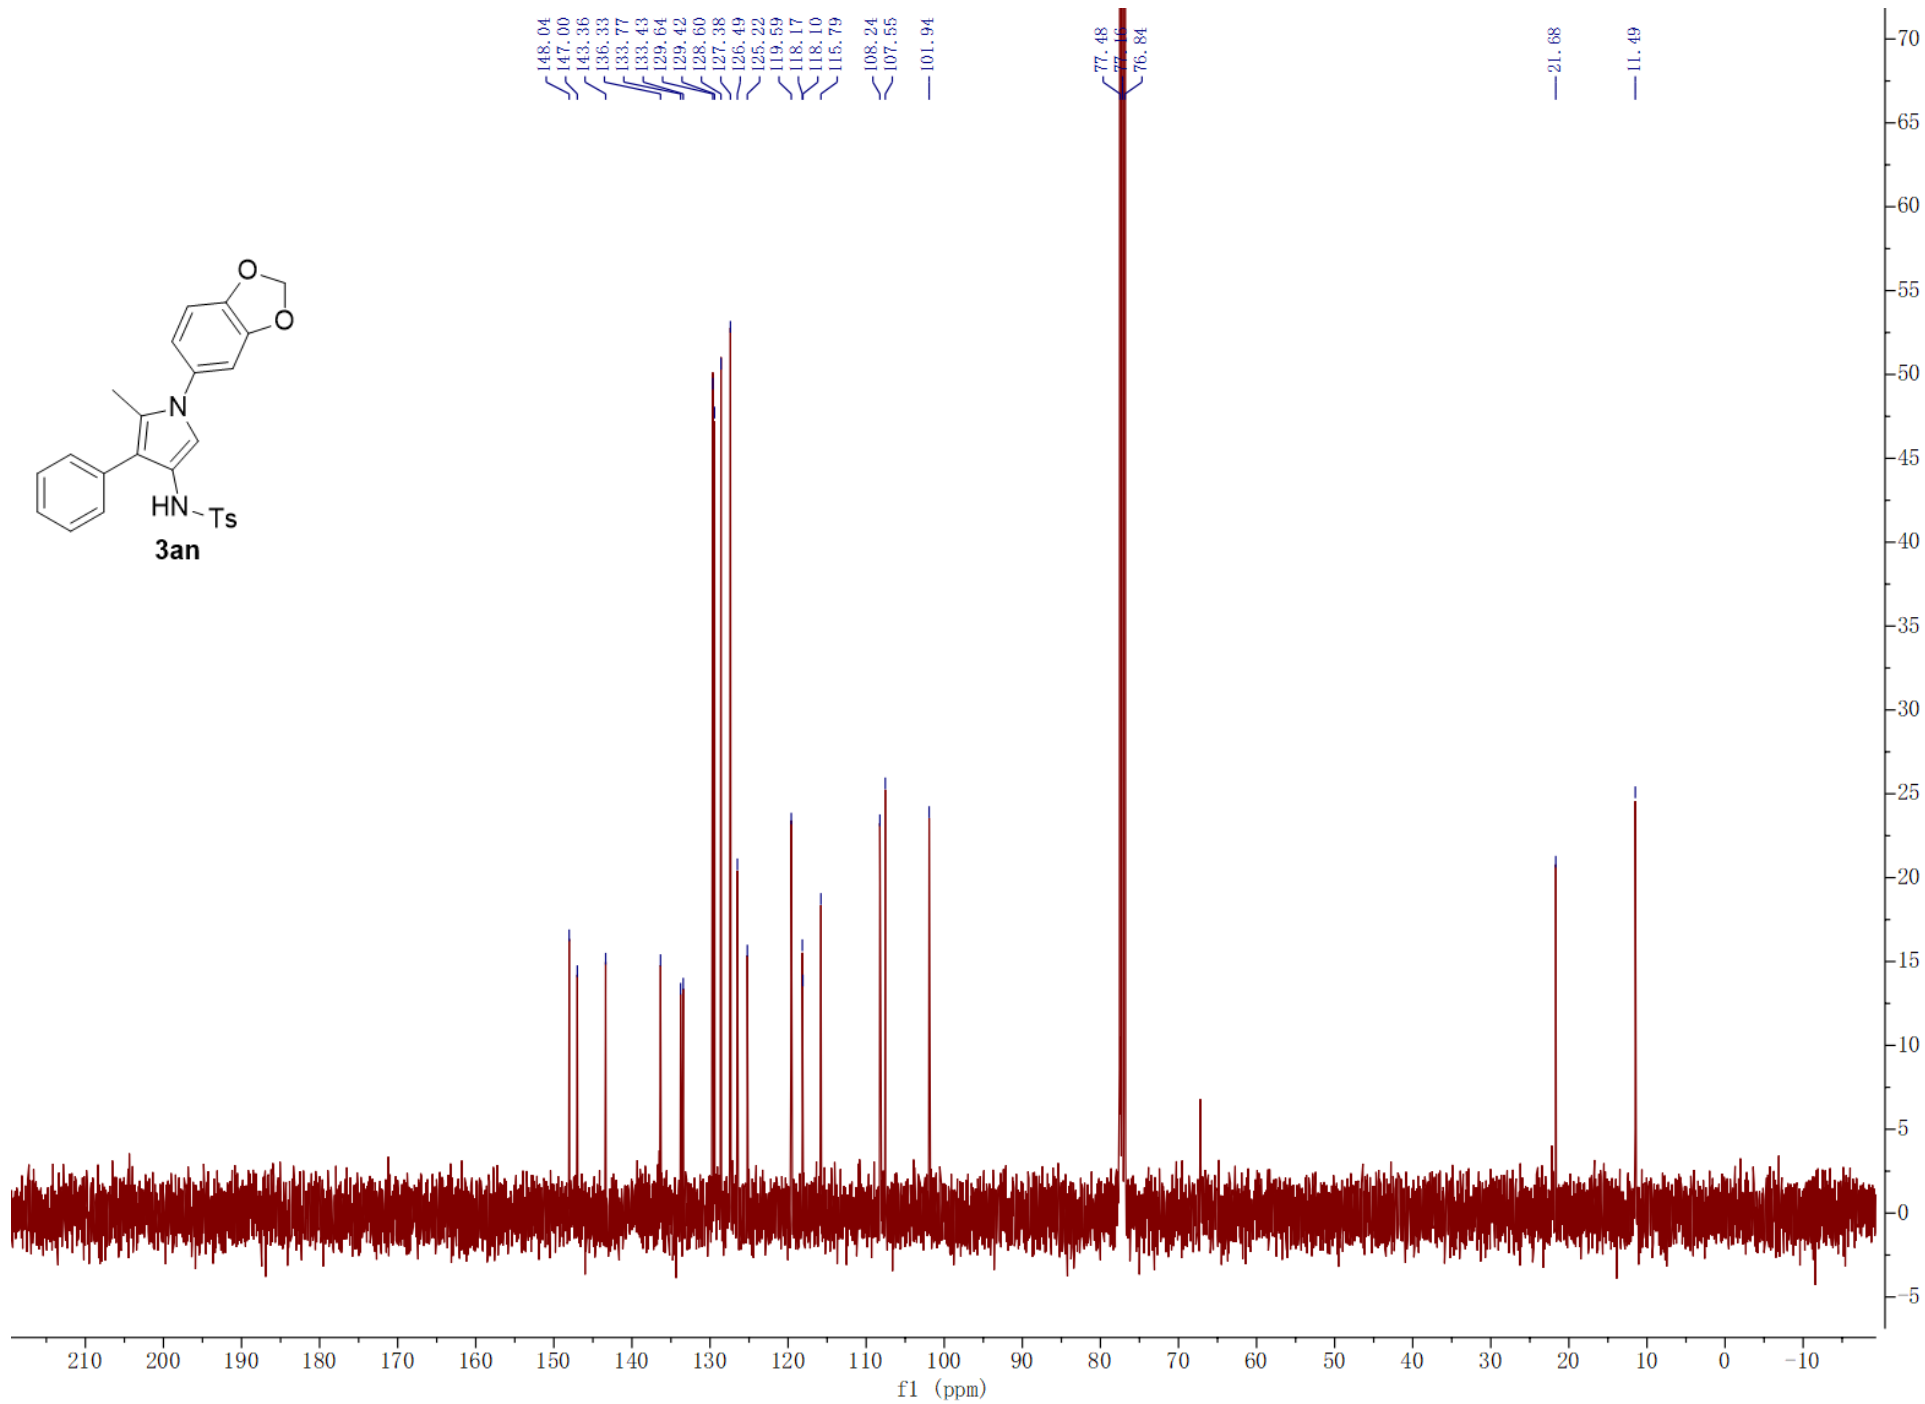

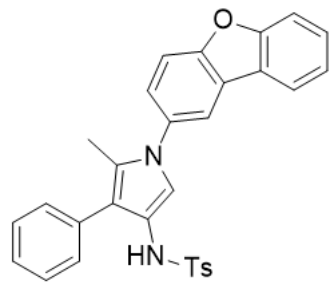

3ao

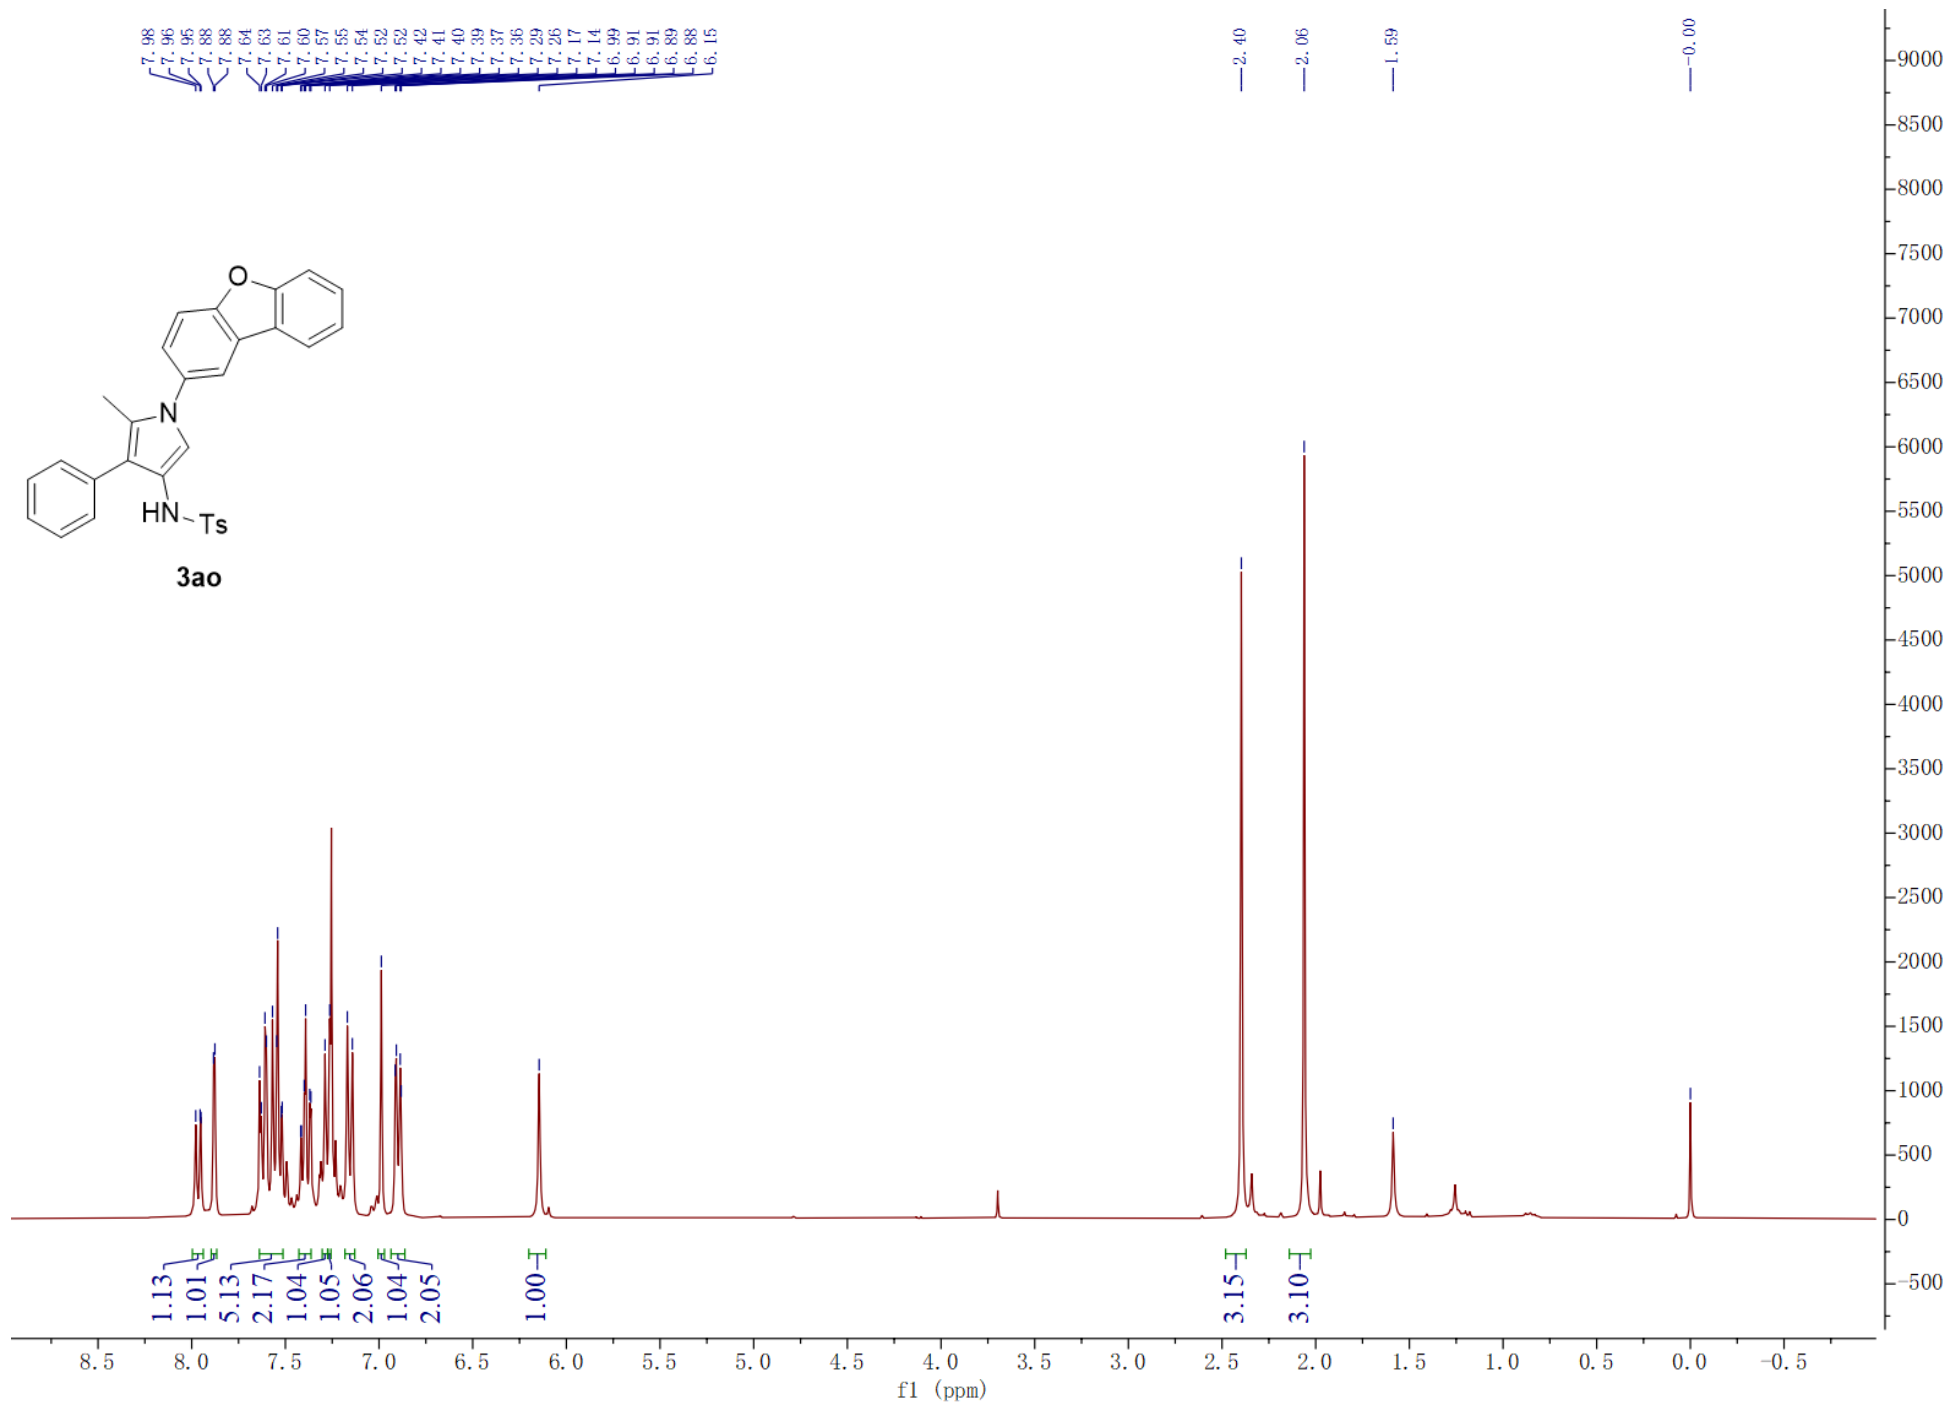



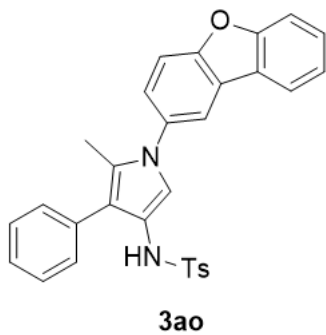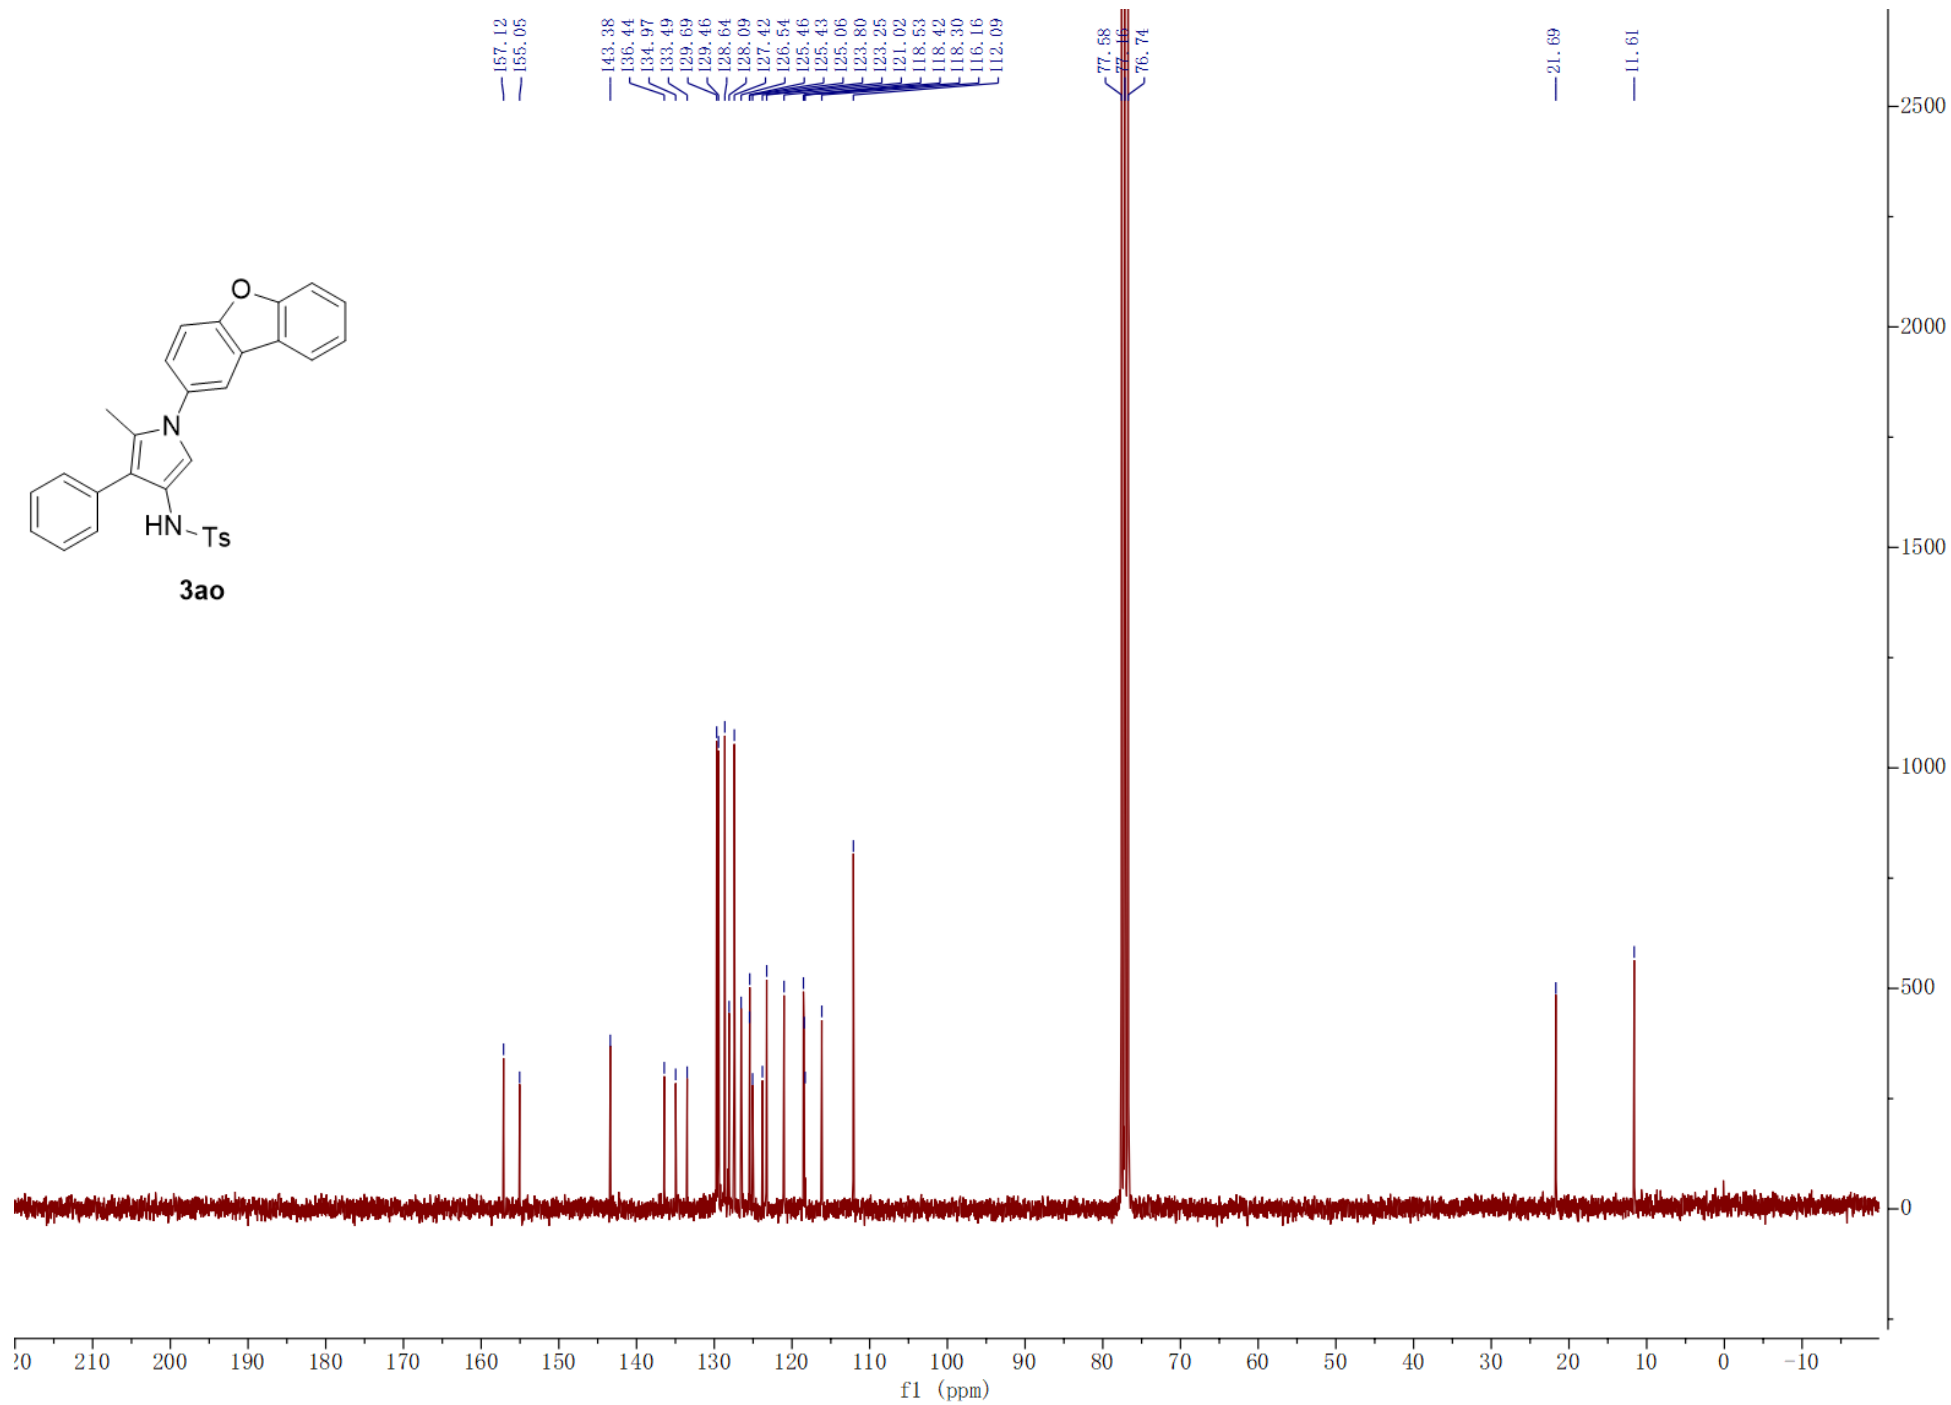

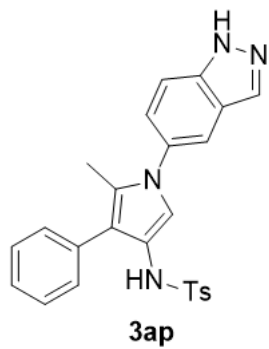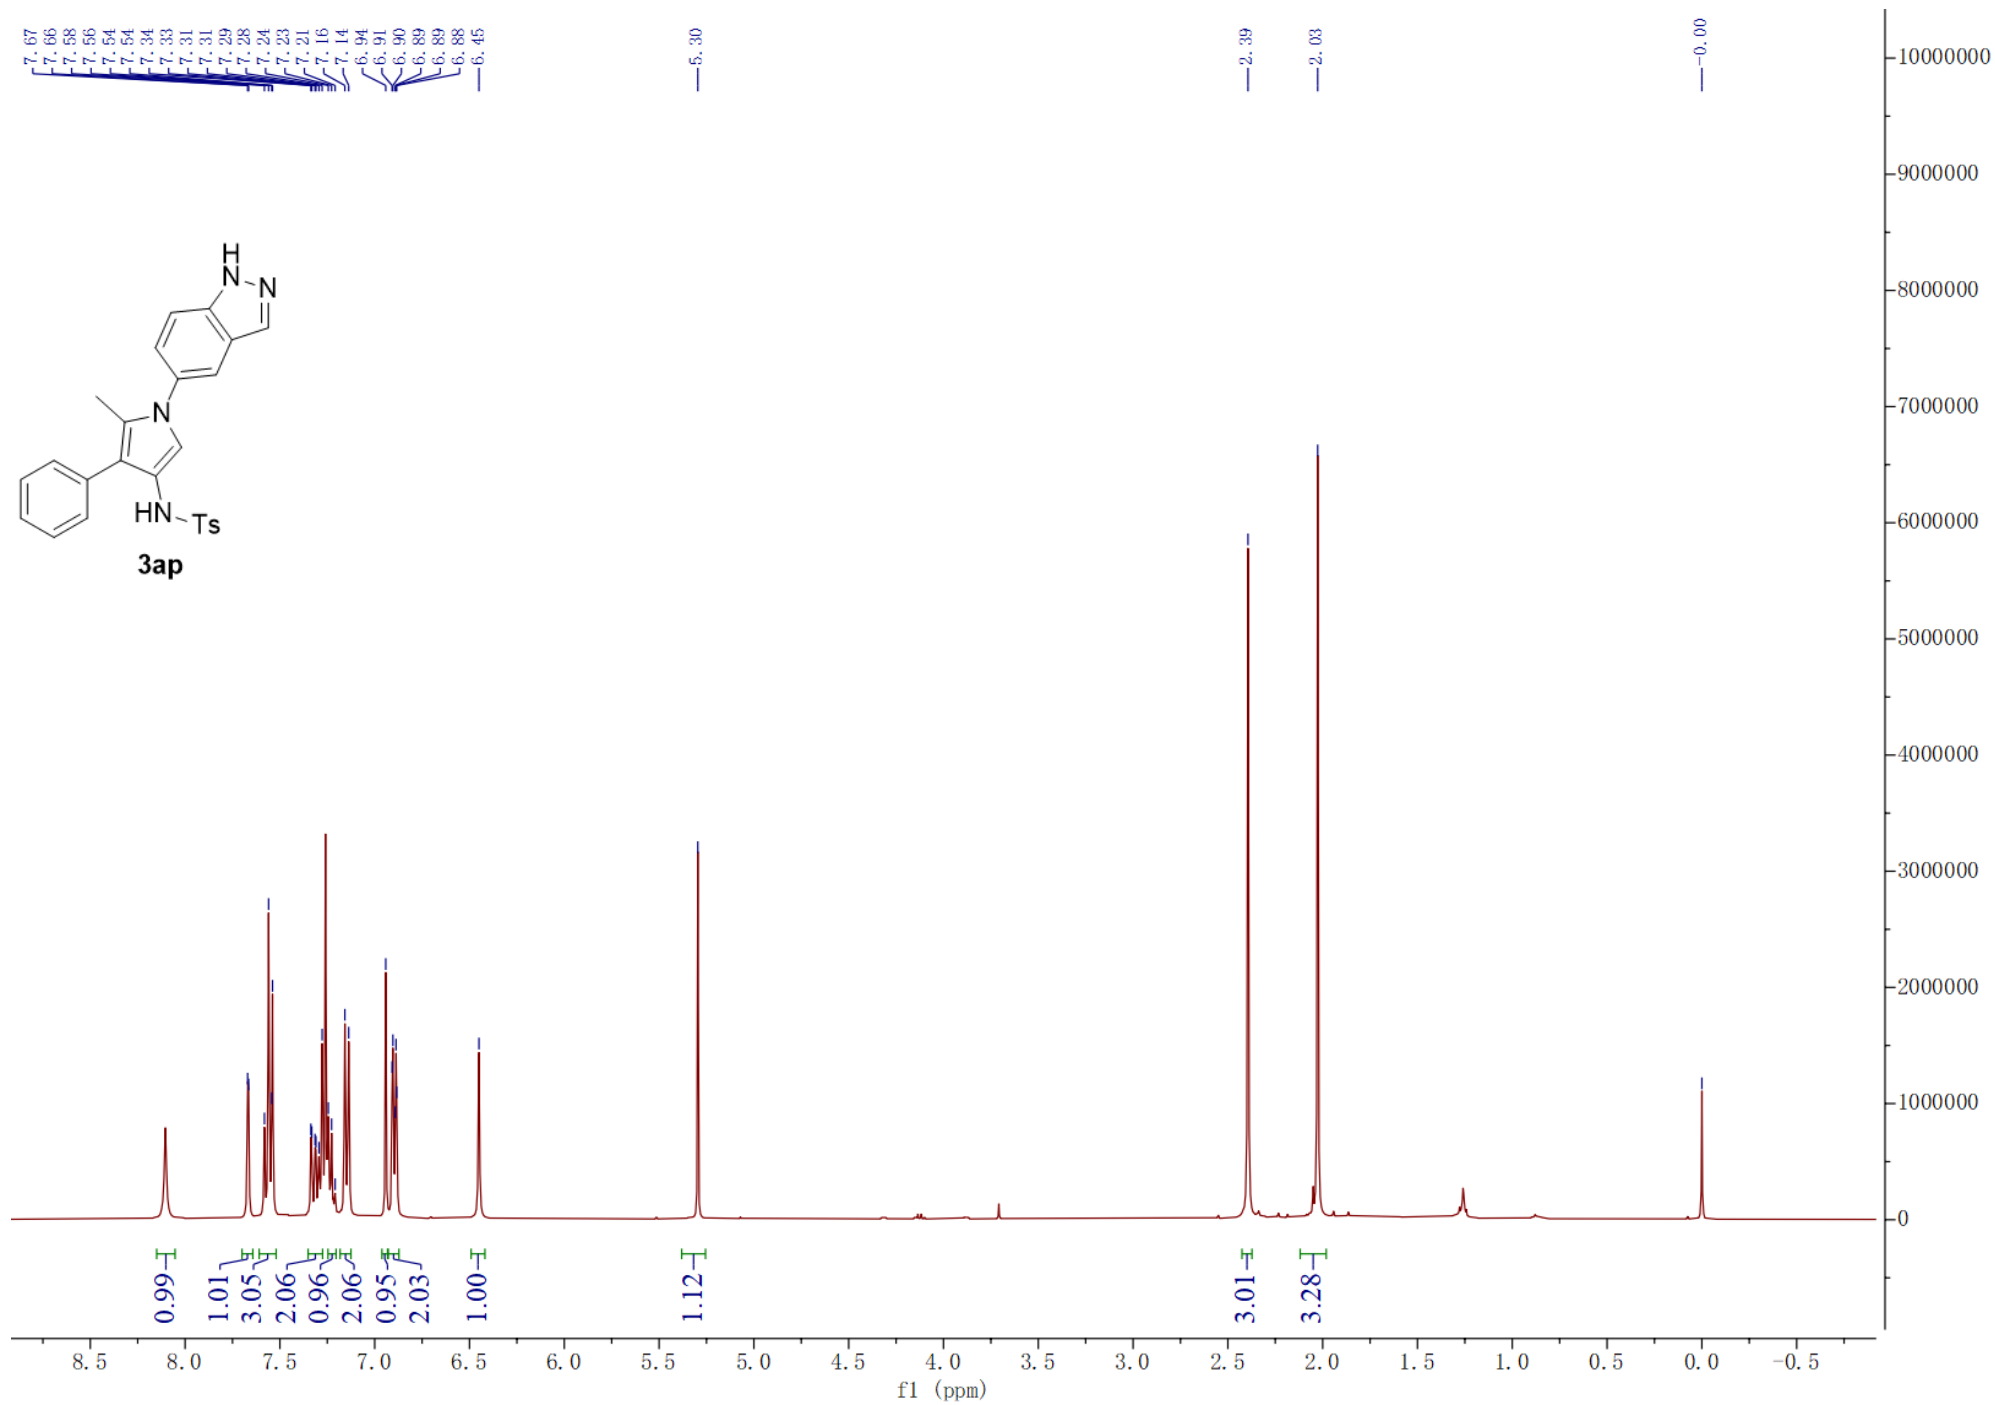

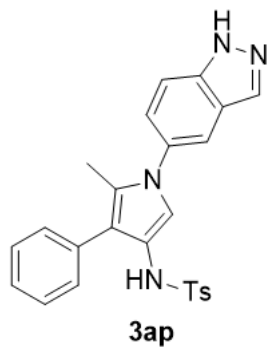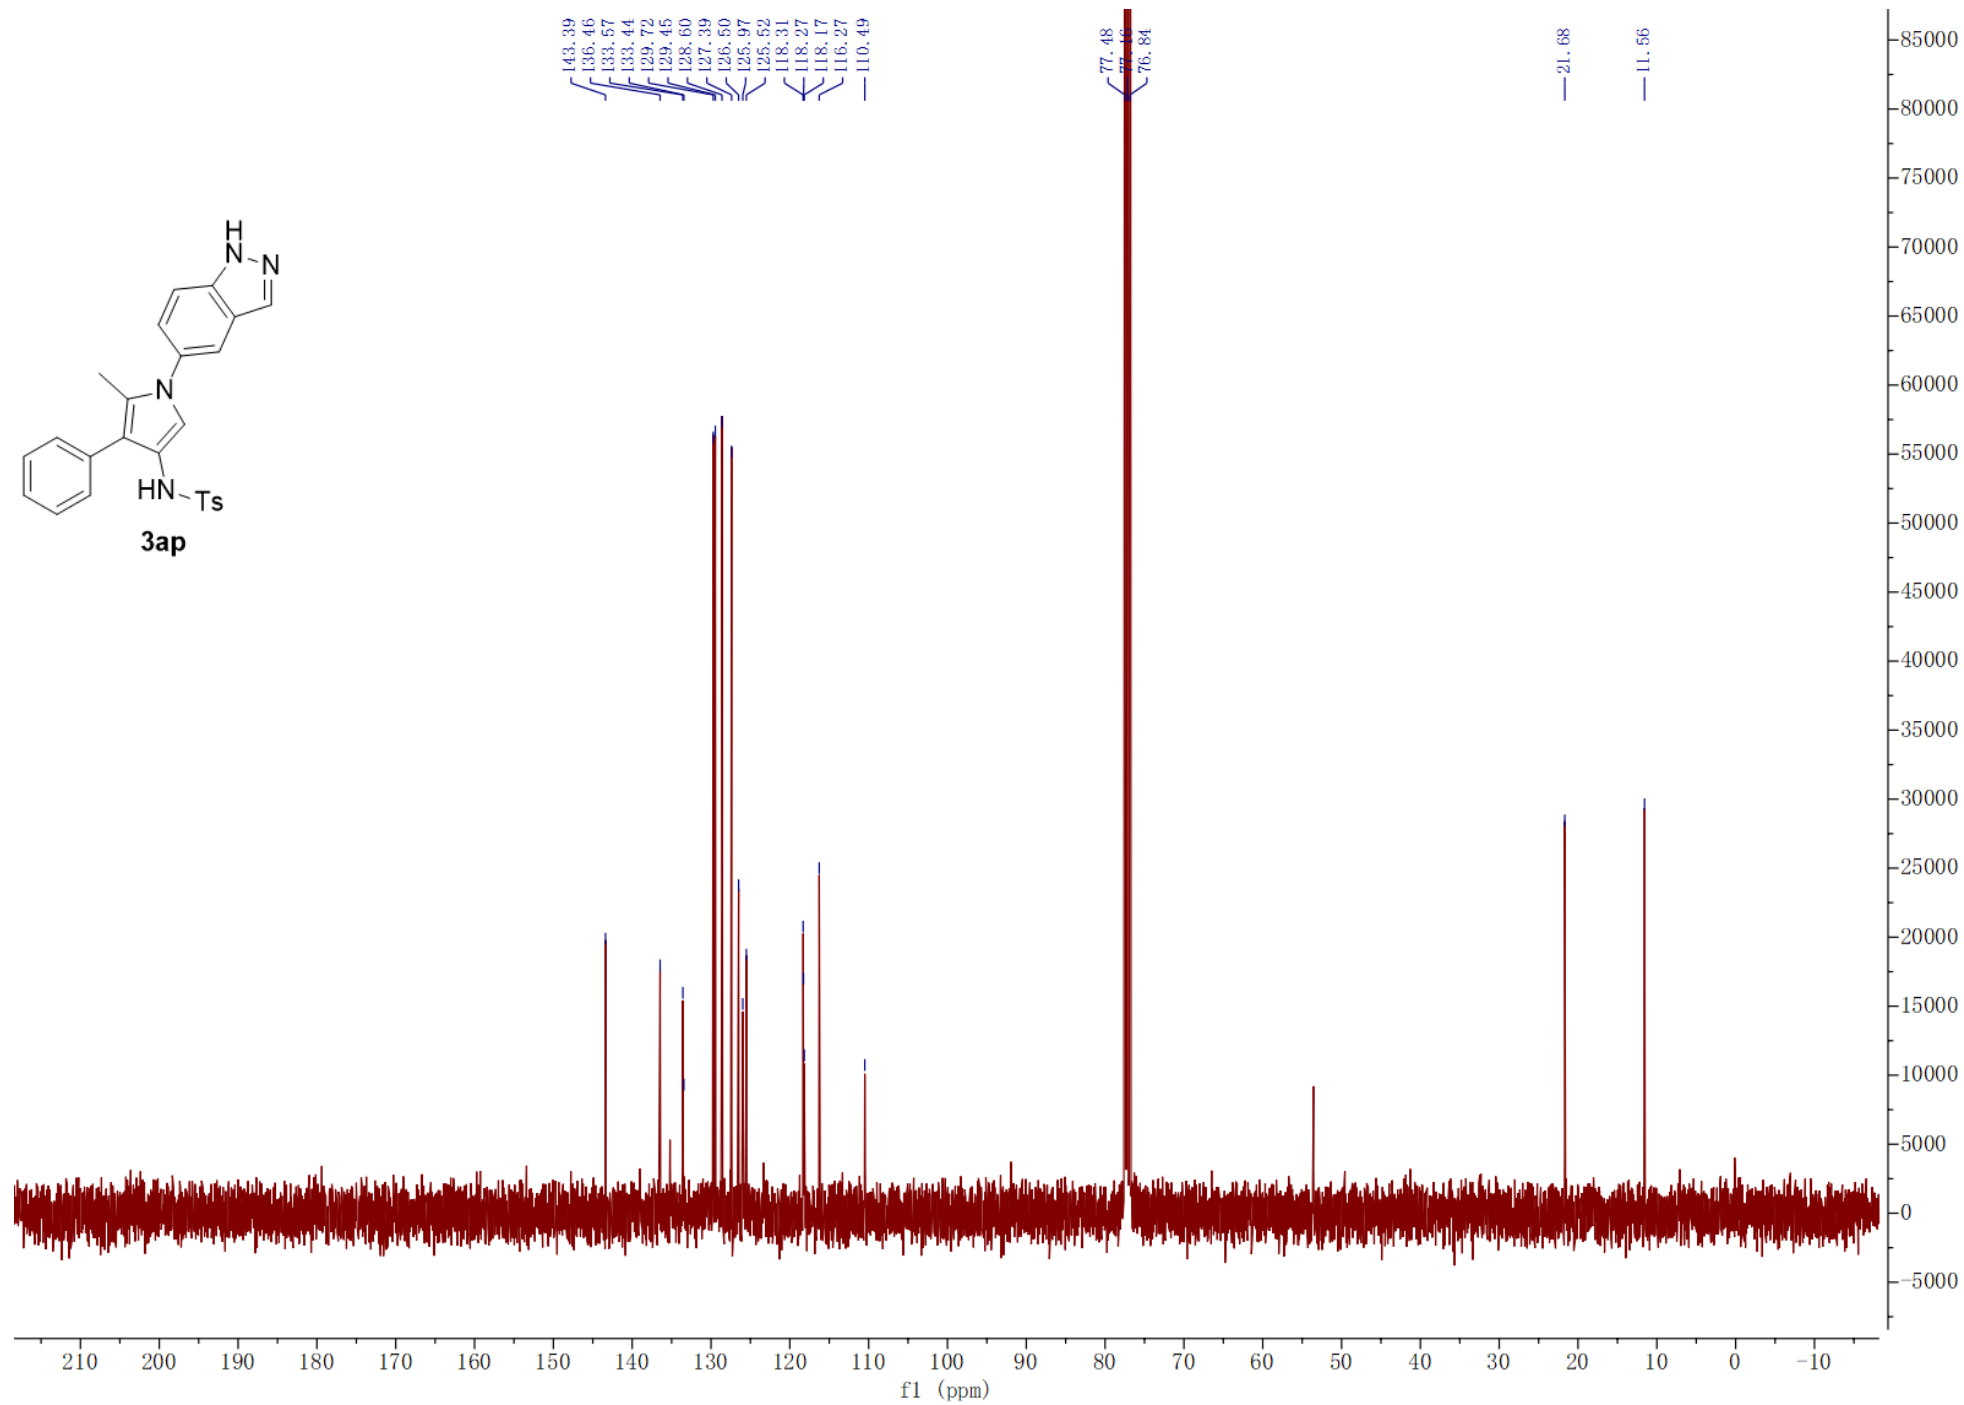

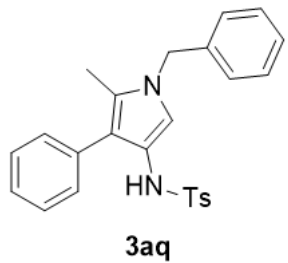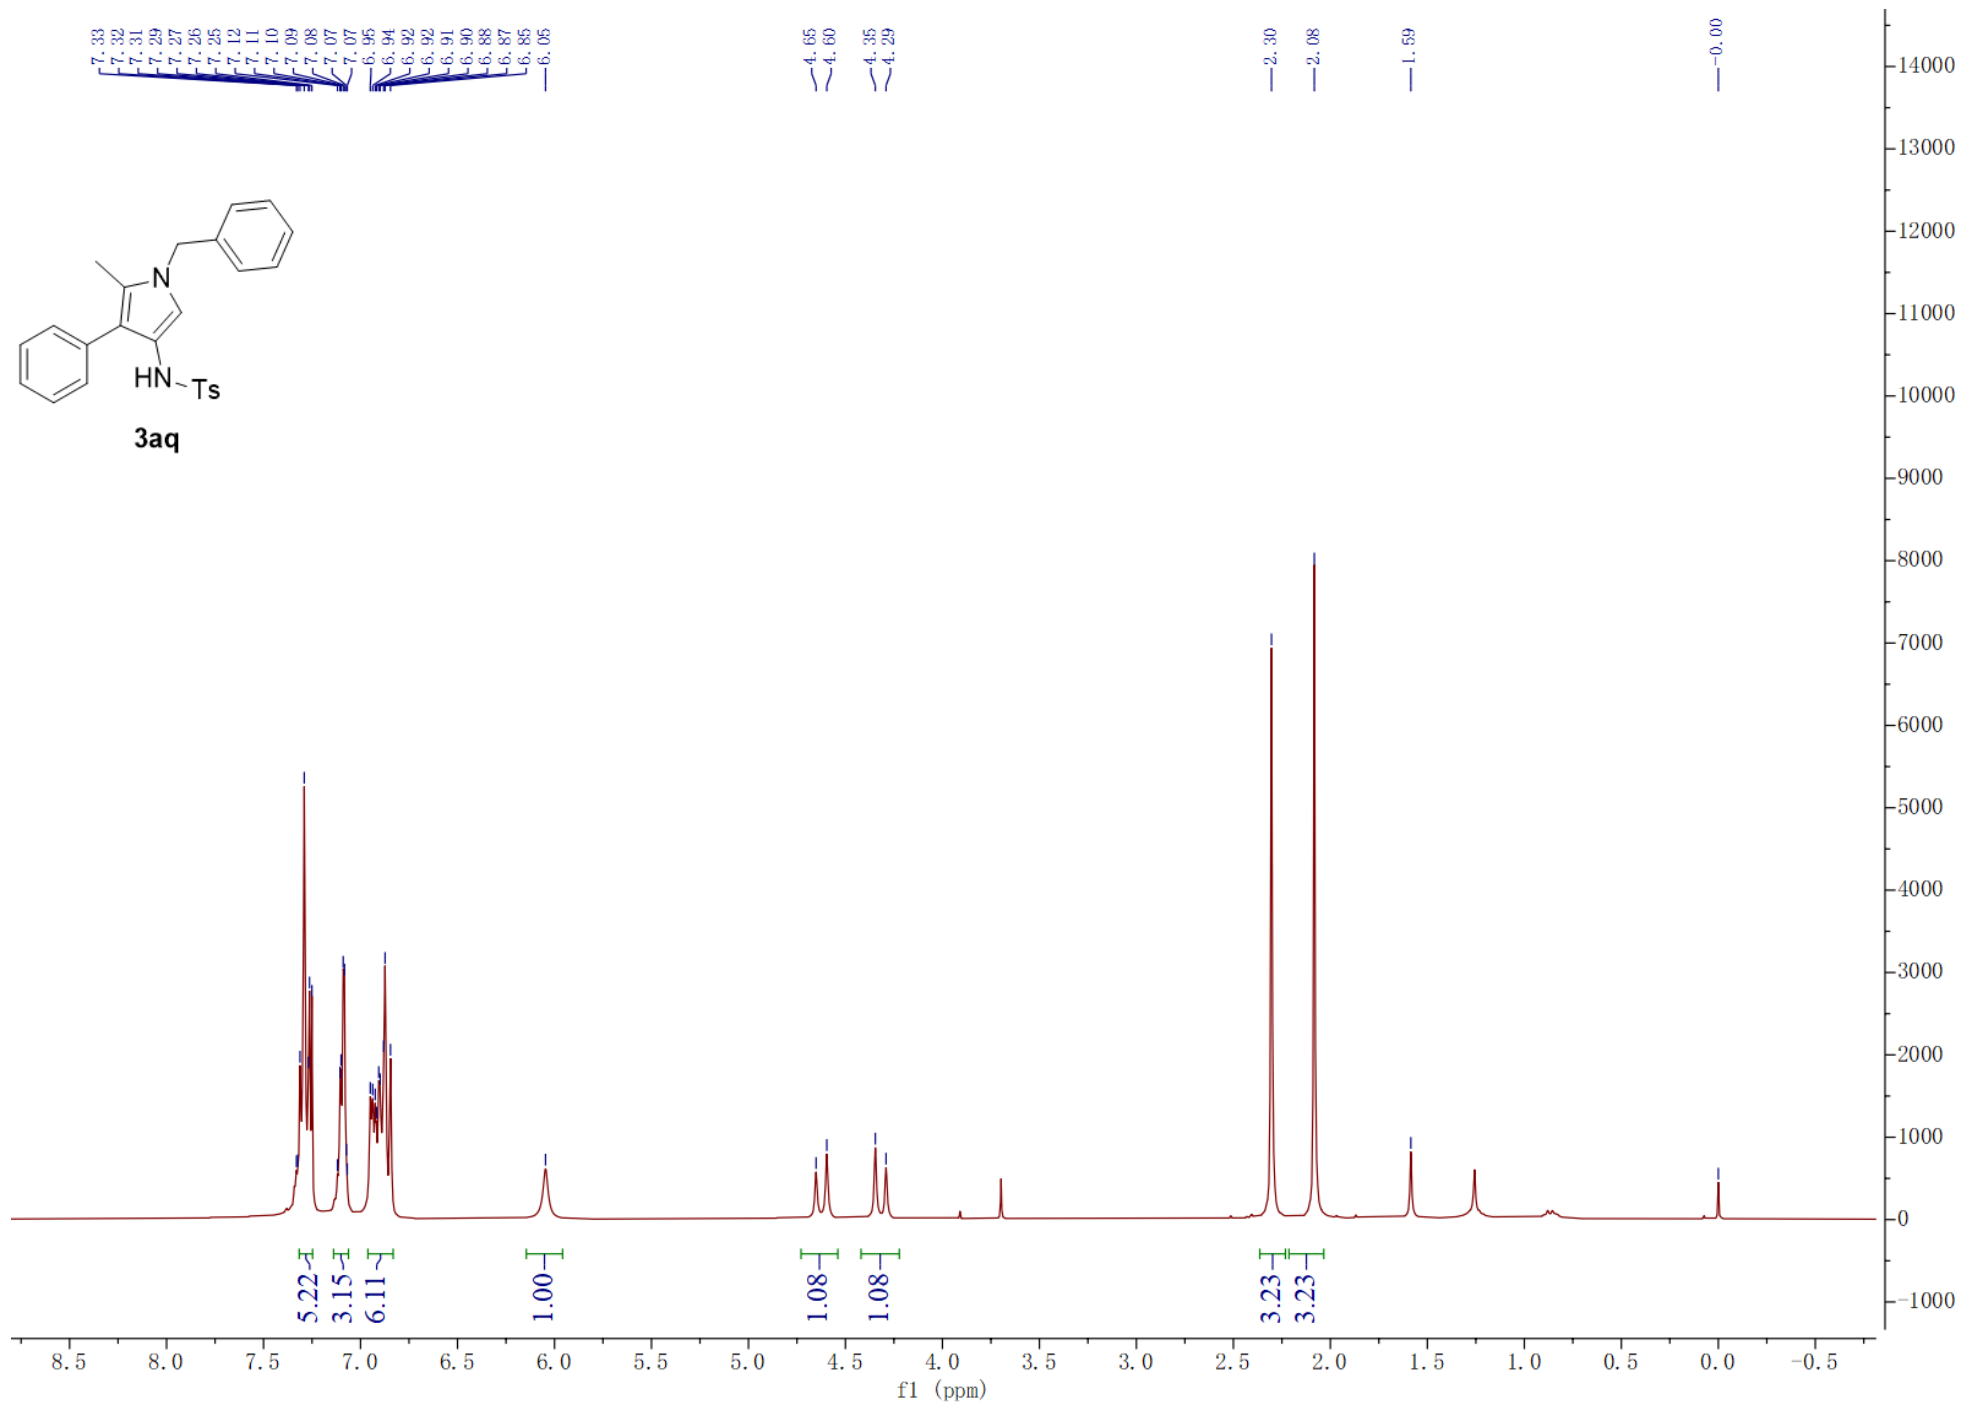

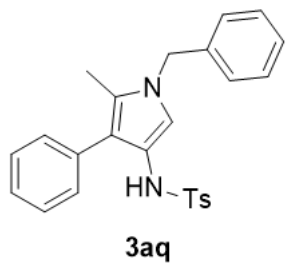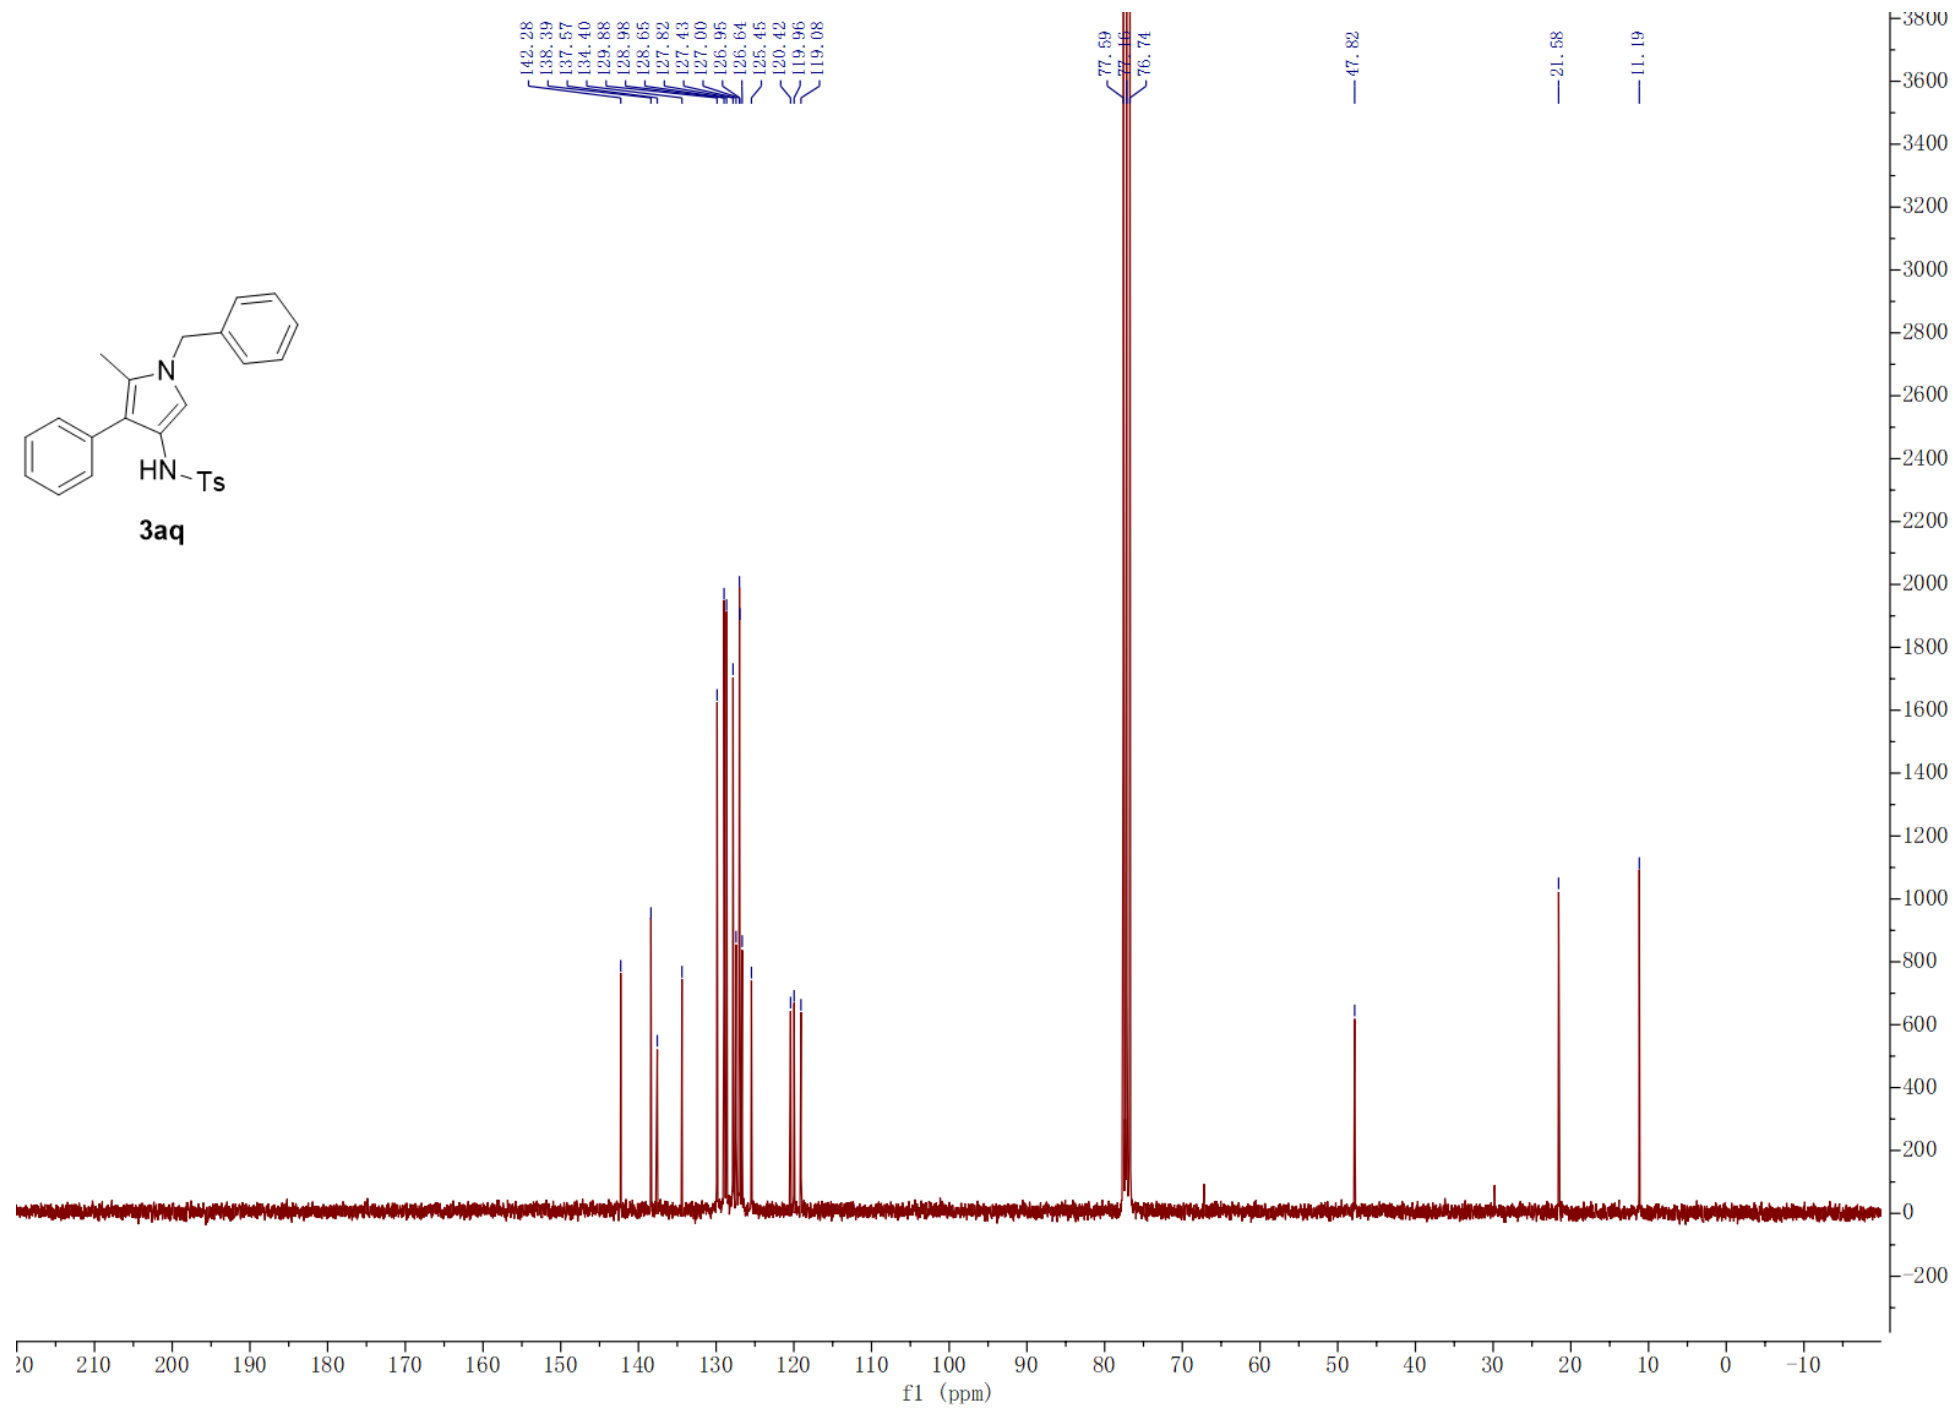

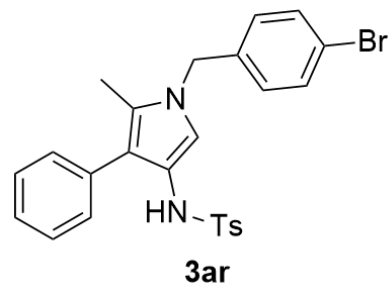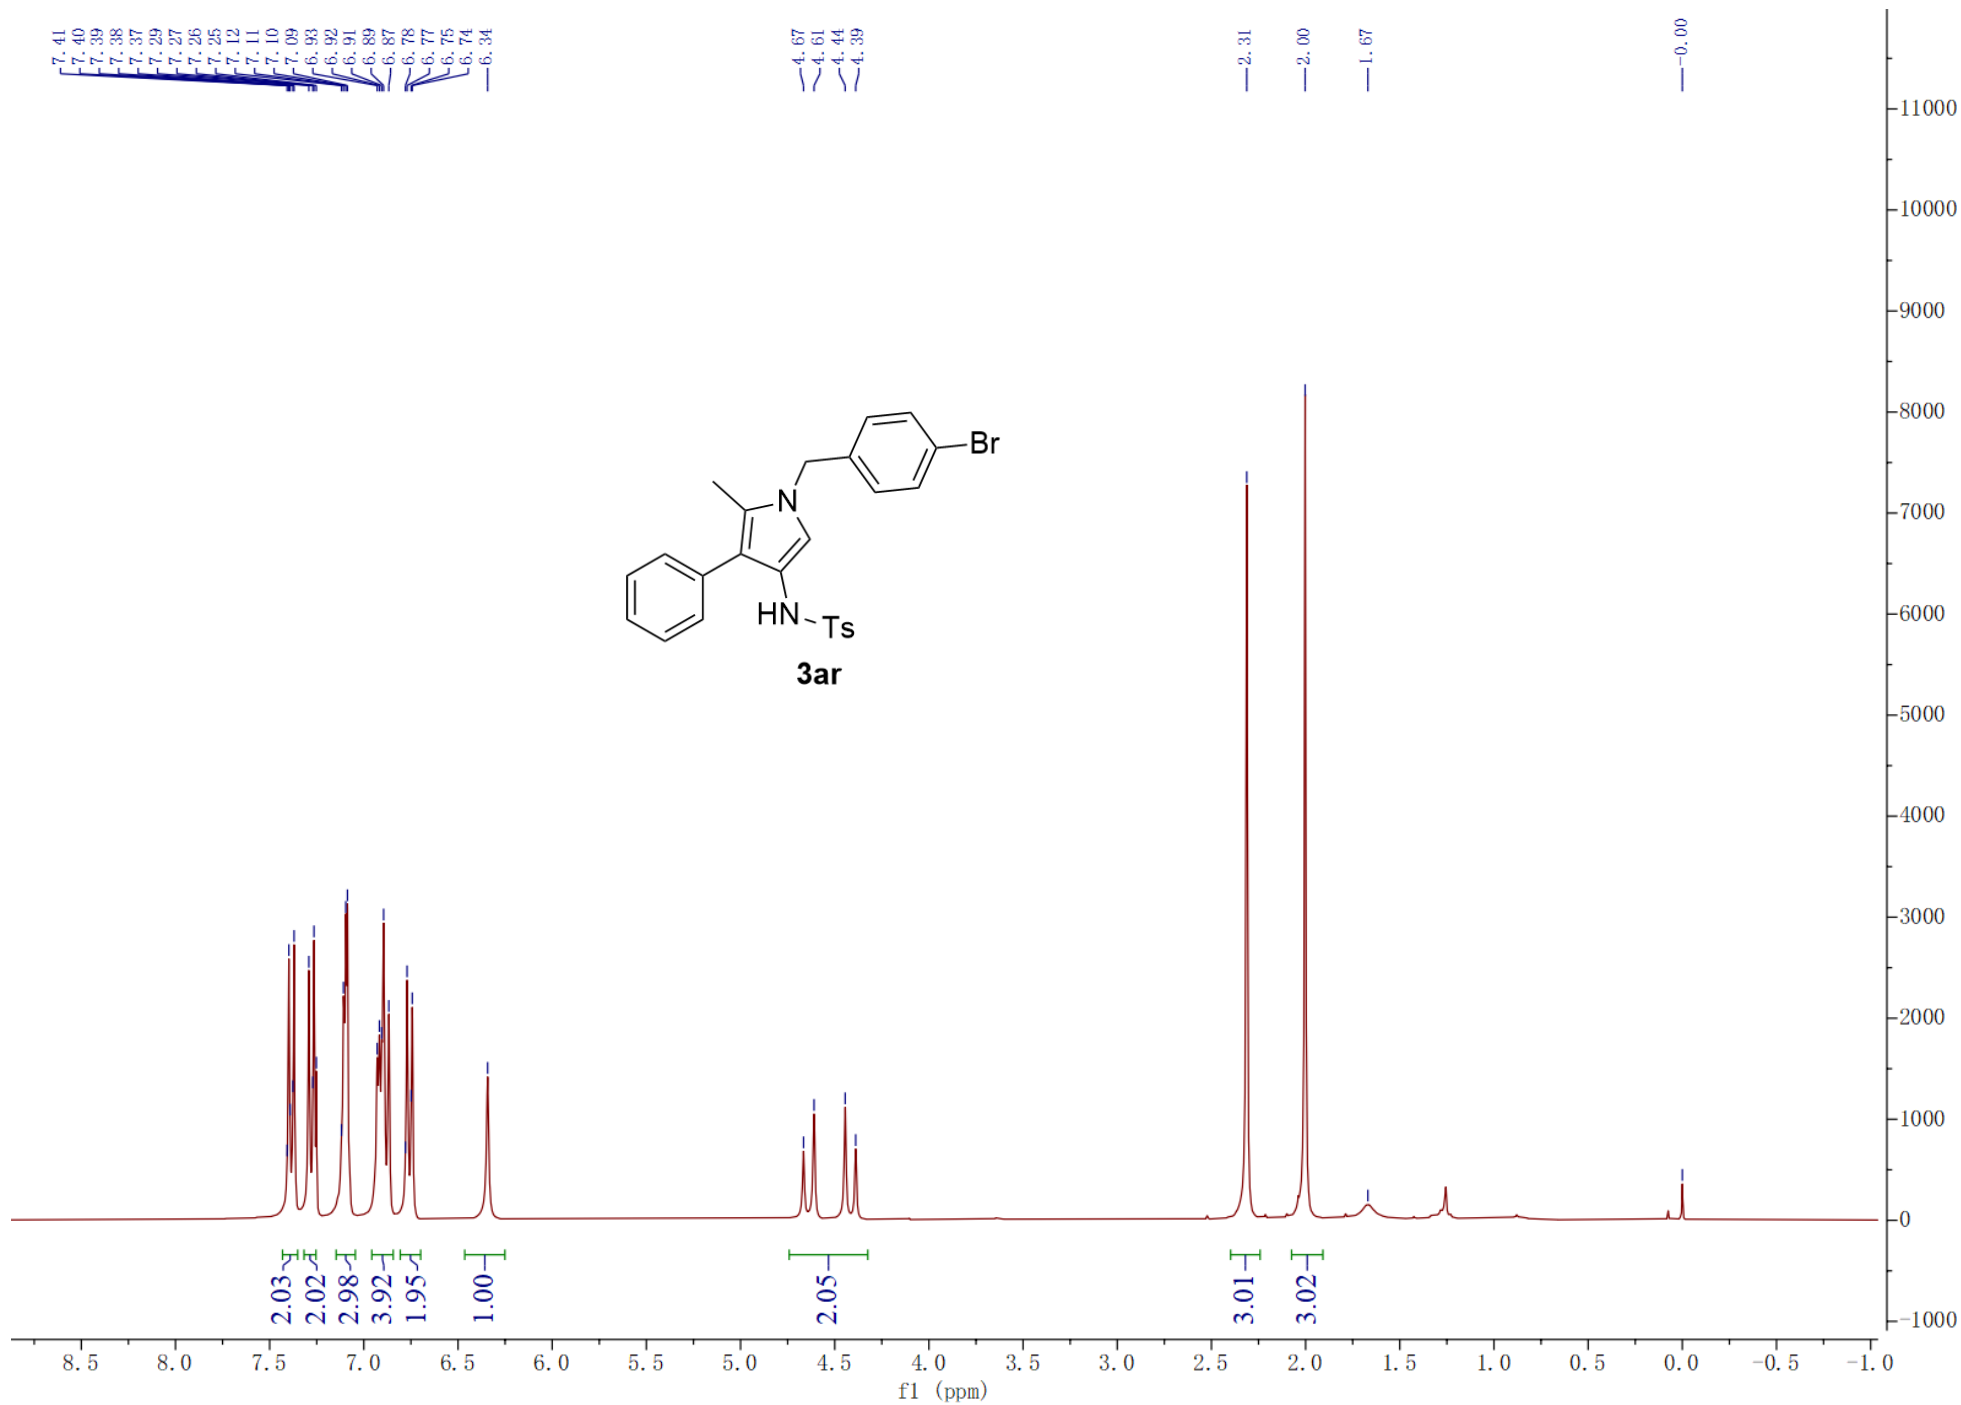

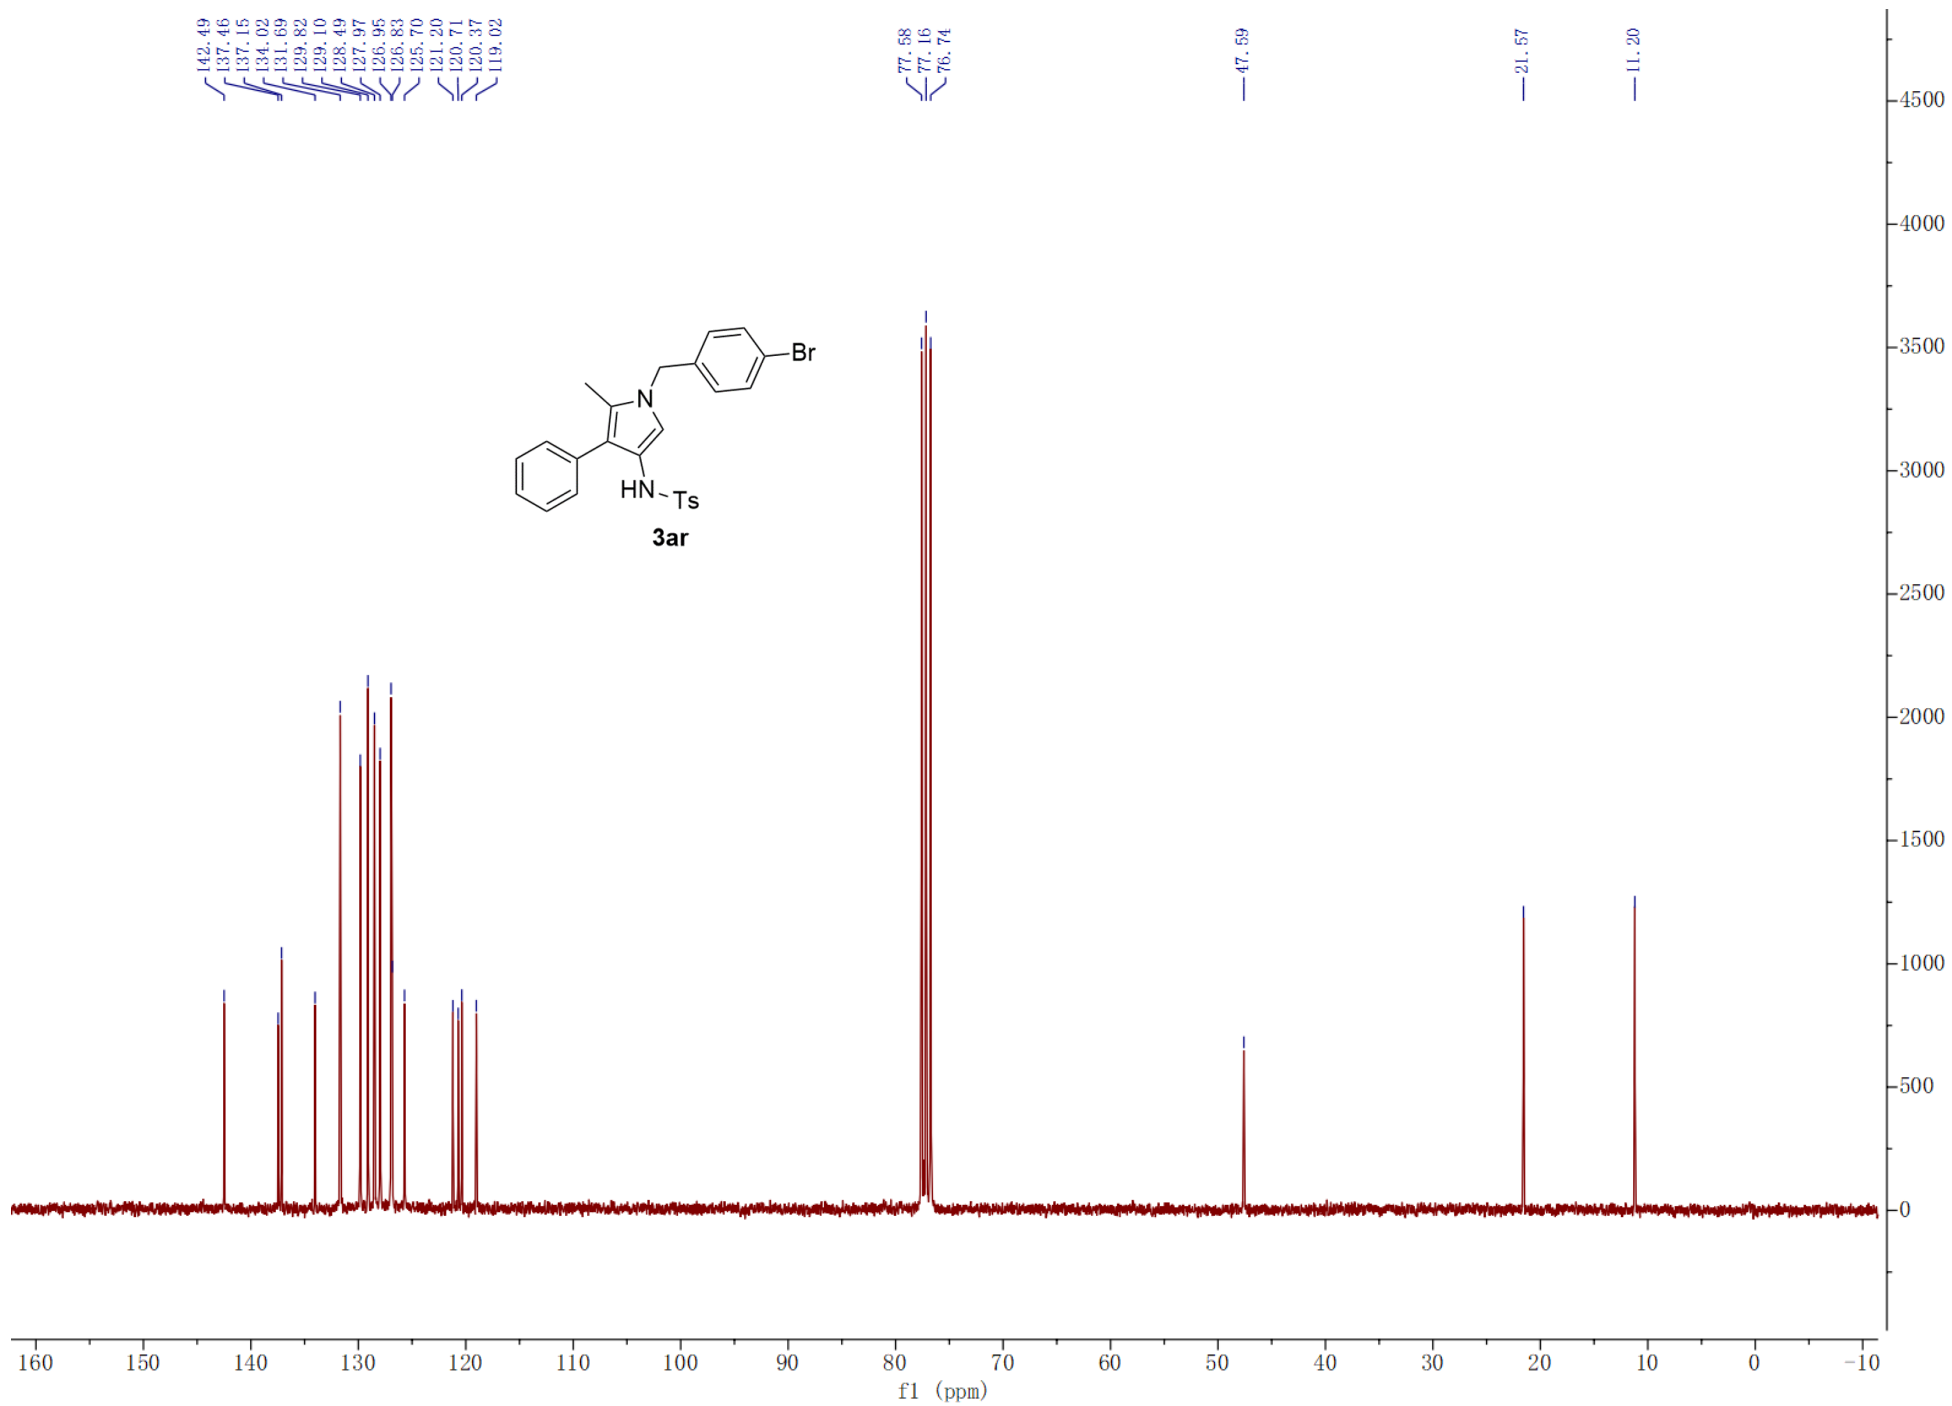

7.29  
7.27  
7.26  
7.13  
7.12  
7.11  
7.10  
7.09  
7.08  
6.97  
6.96  
6.95  
6.94  
6.88  
6.85  
6.84  
6.83  
6.81  
6.80  
6.77  
6.09

4.61  
4.56  
4.29  
4.24  
3.81  
3.80

2.31  
2.08  
1.61

-0.00

10000

9000

8000

7000

6000

5000

4000

3000

2000

1000

0

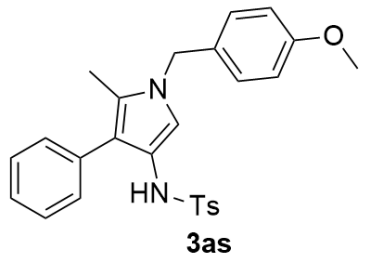

2.90  
3.13  
2.03  
6.26

1.00

1.25  
1.07  
3.45

3.10  
3.06

8.5 8.0 7.5 7.0 6.5 6.0 5.5 5.0 4.5 4.0 3.5 3.0 2.5 2.0 1.5 1.0 0.5 0.0 -0.5

f1 (ppm)

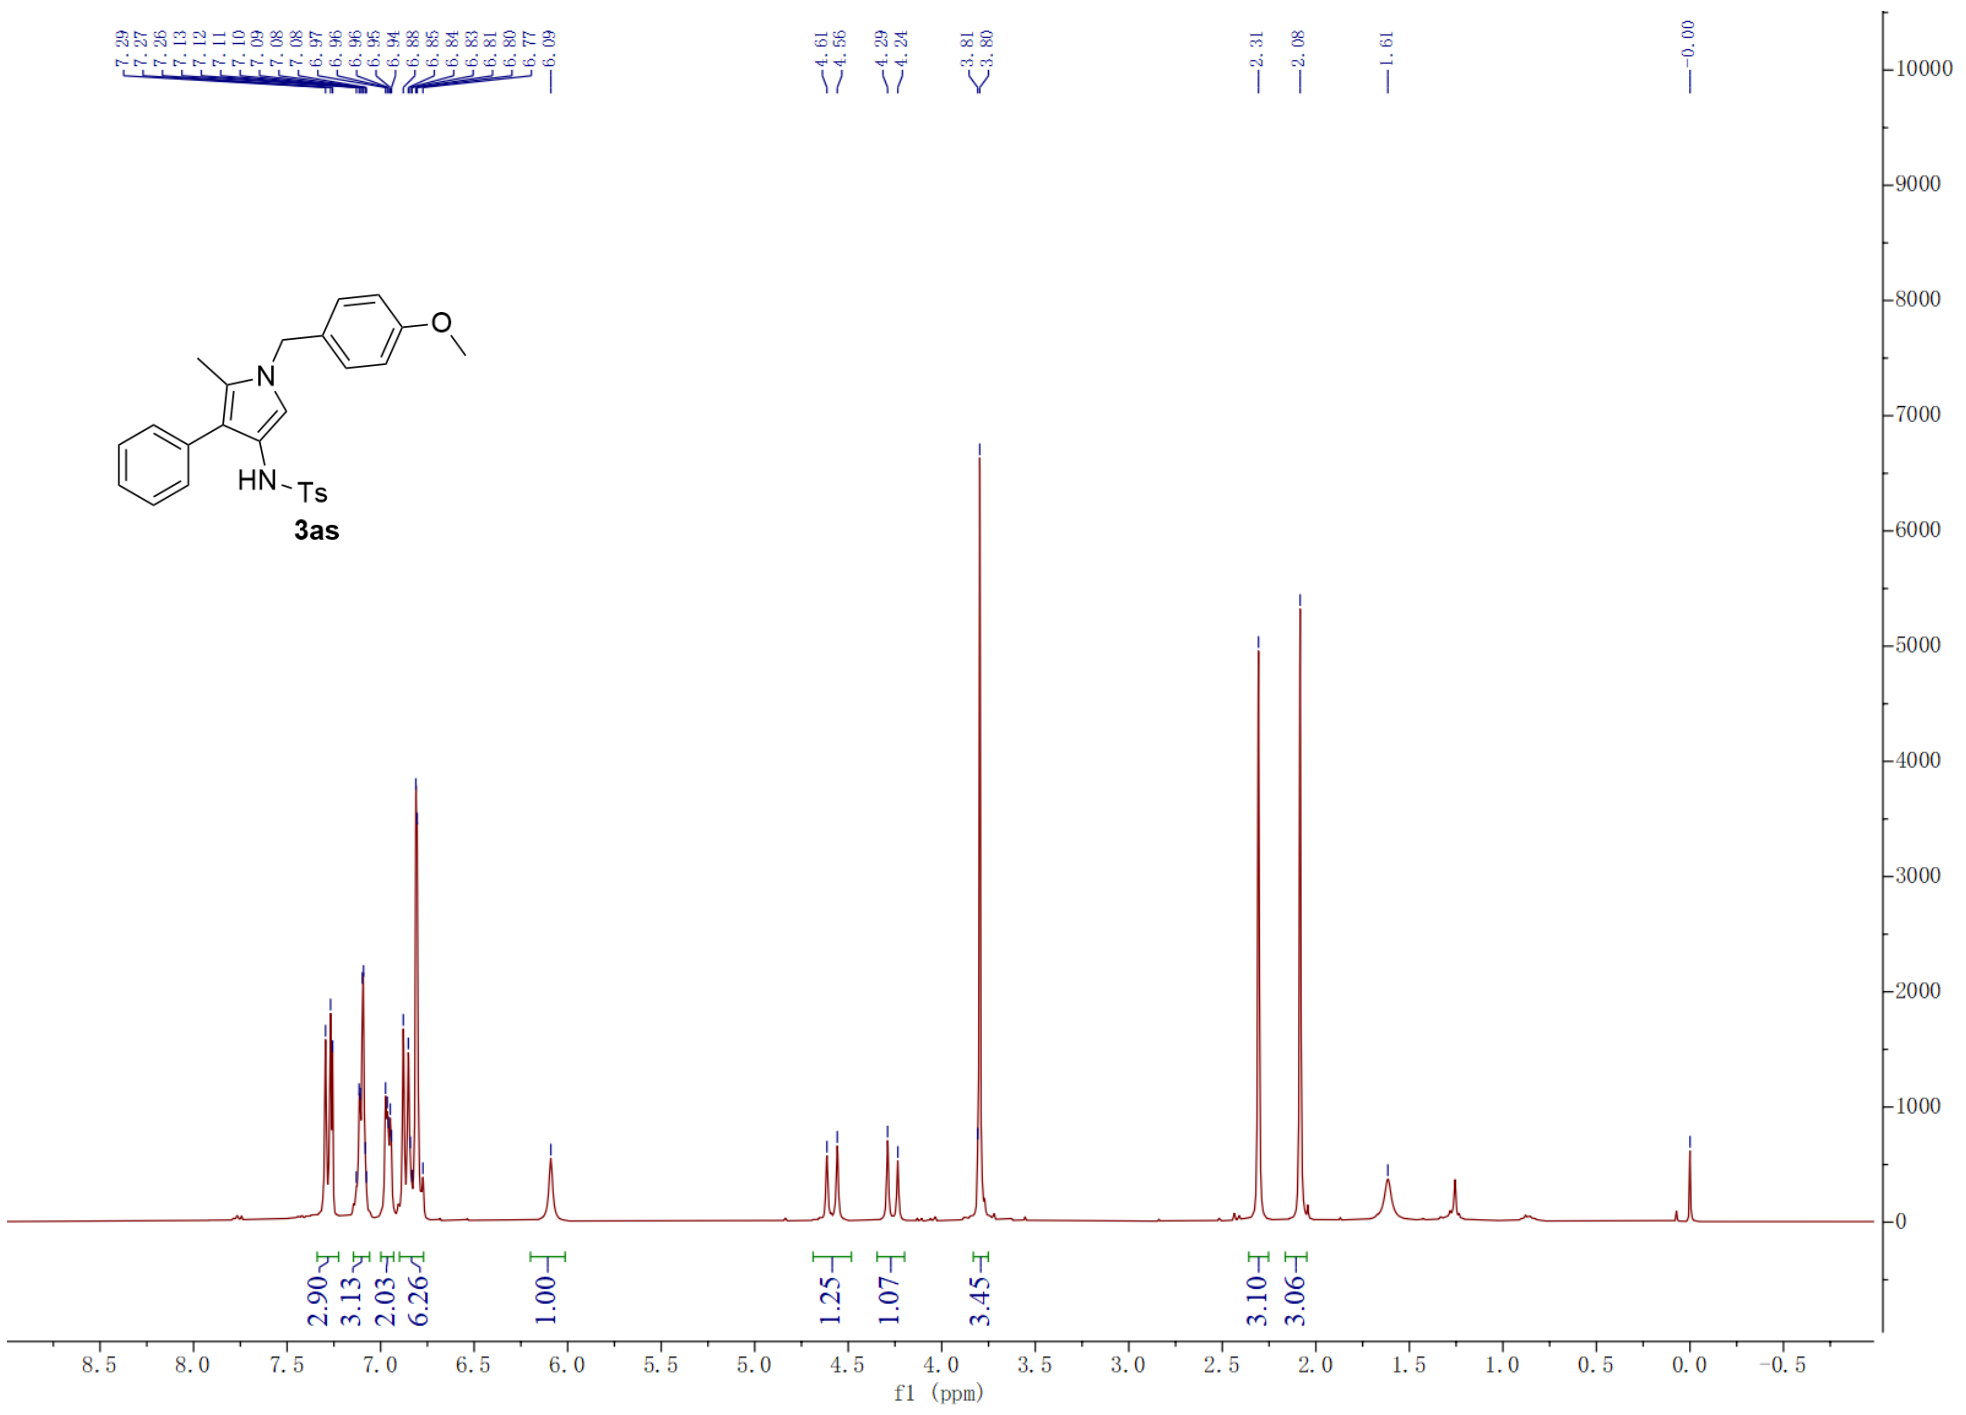



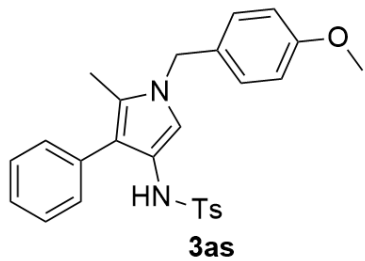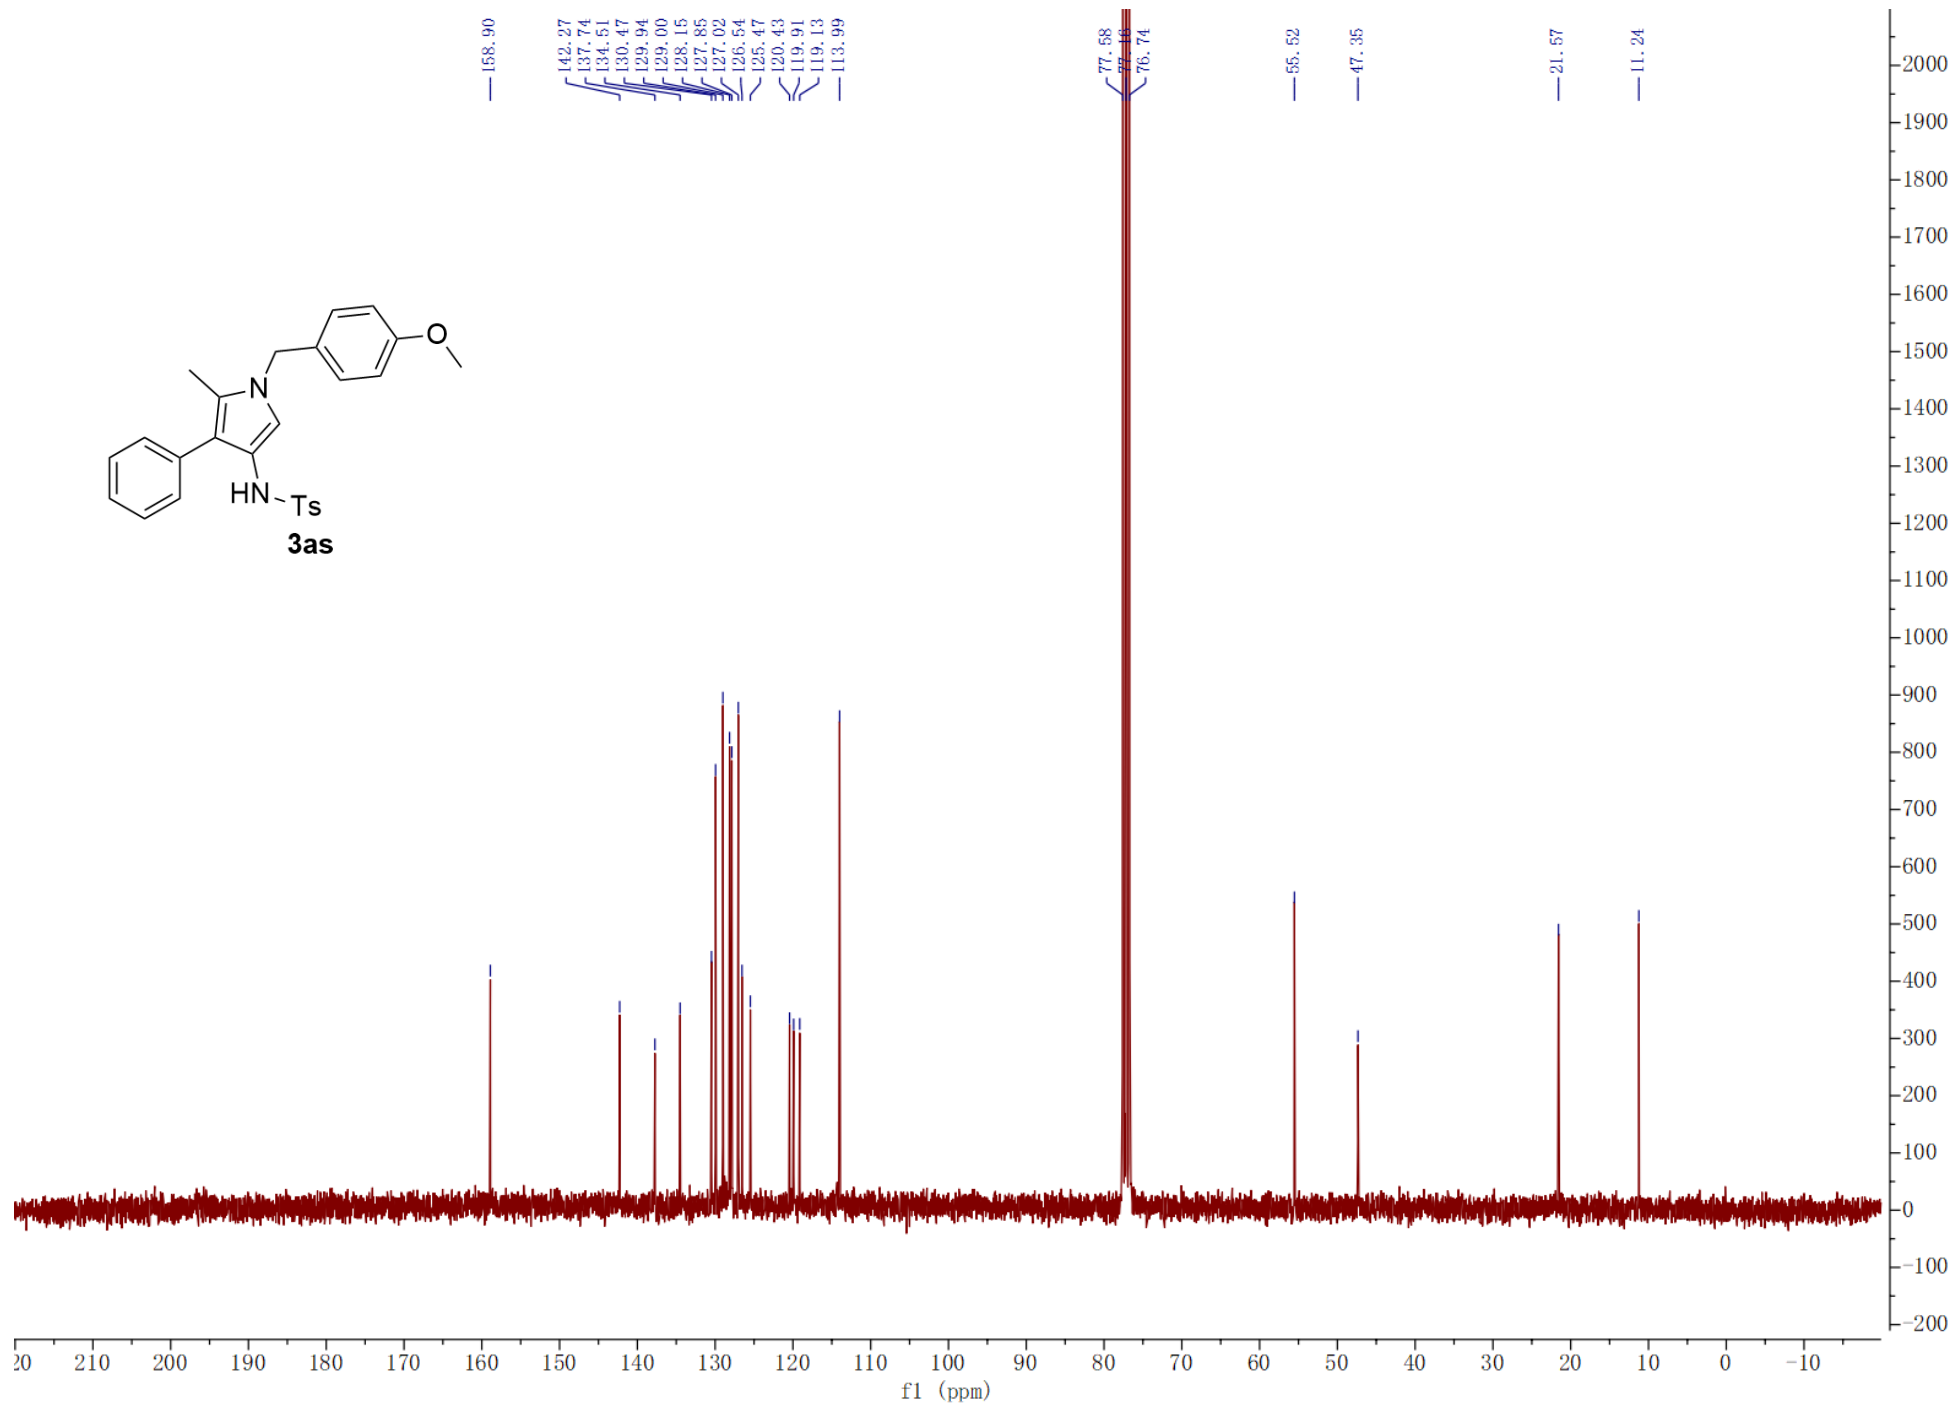

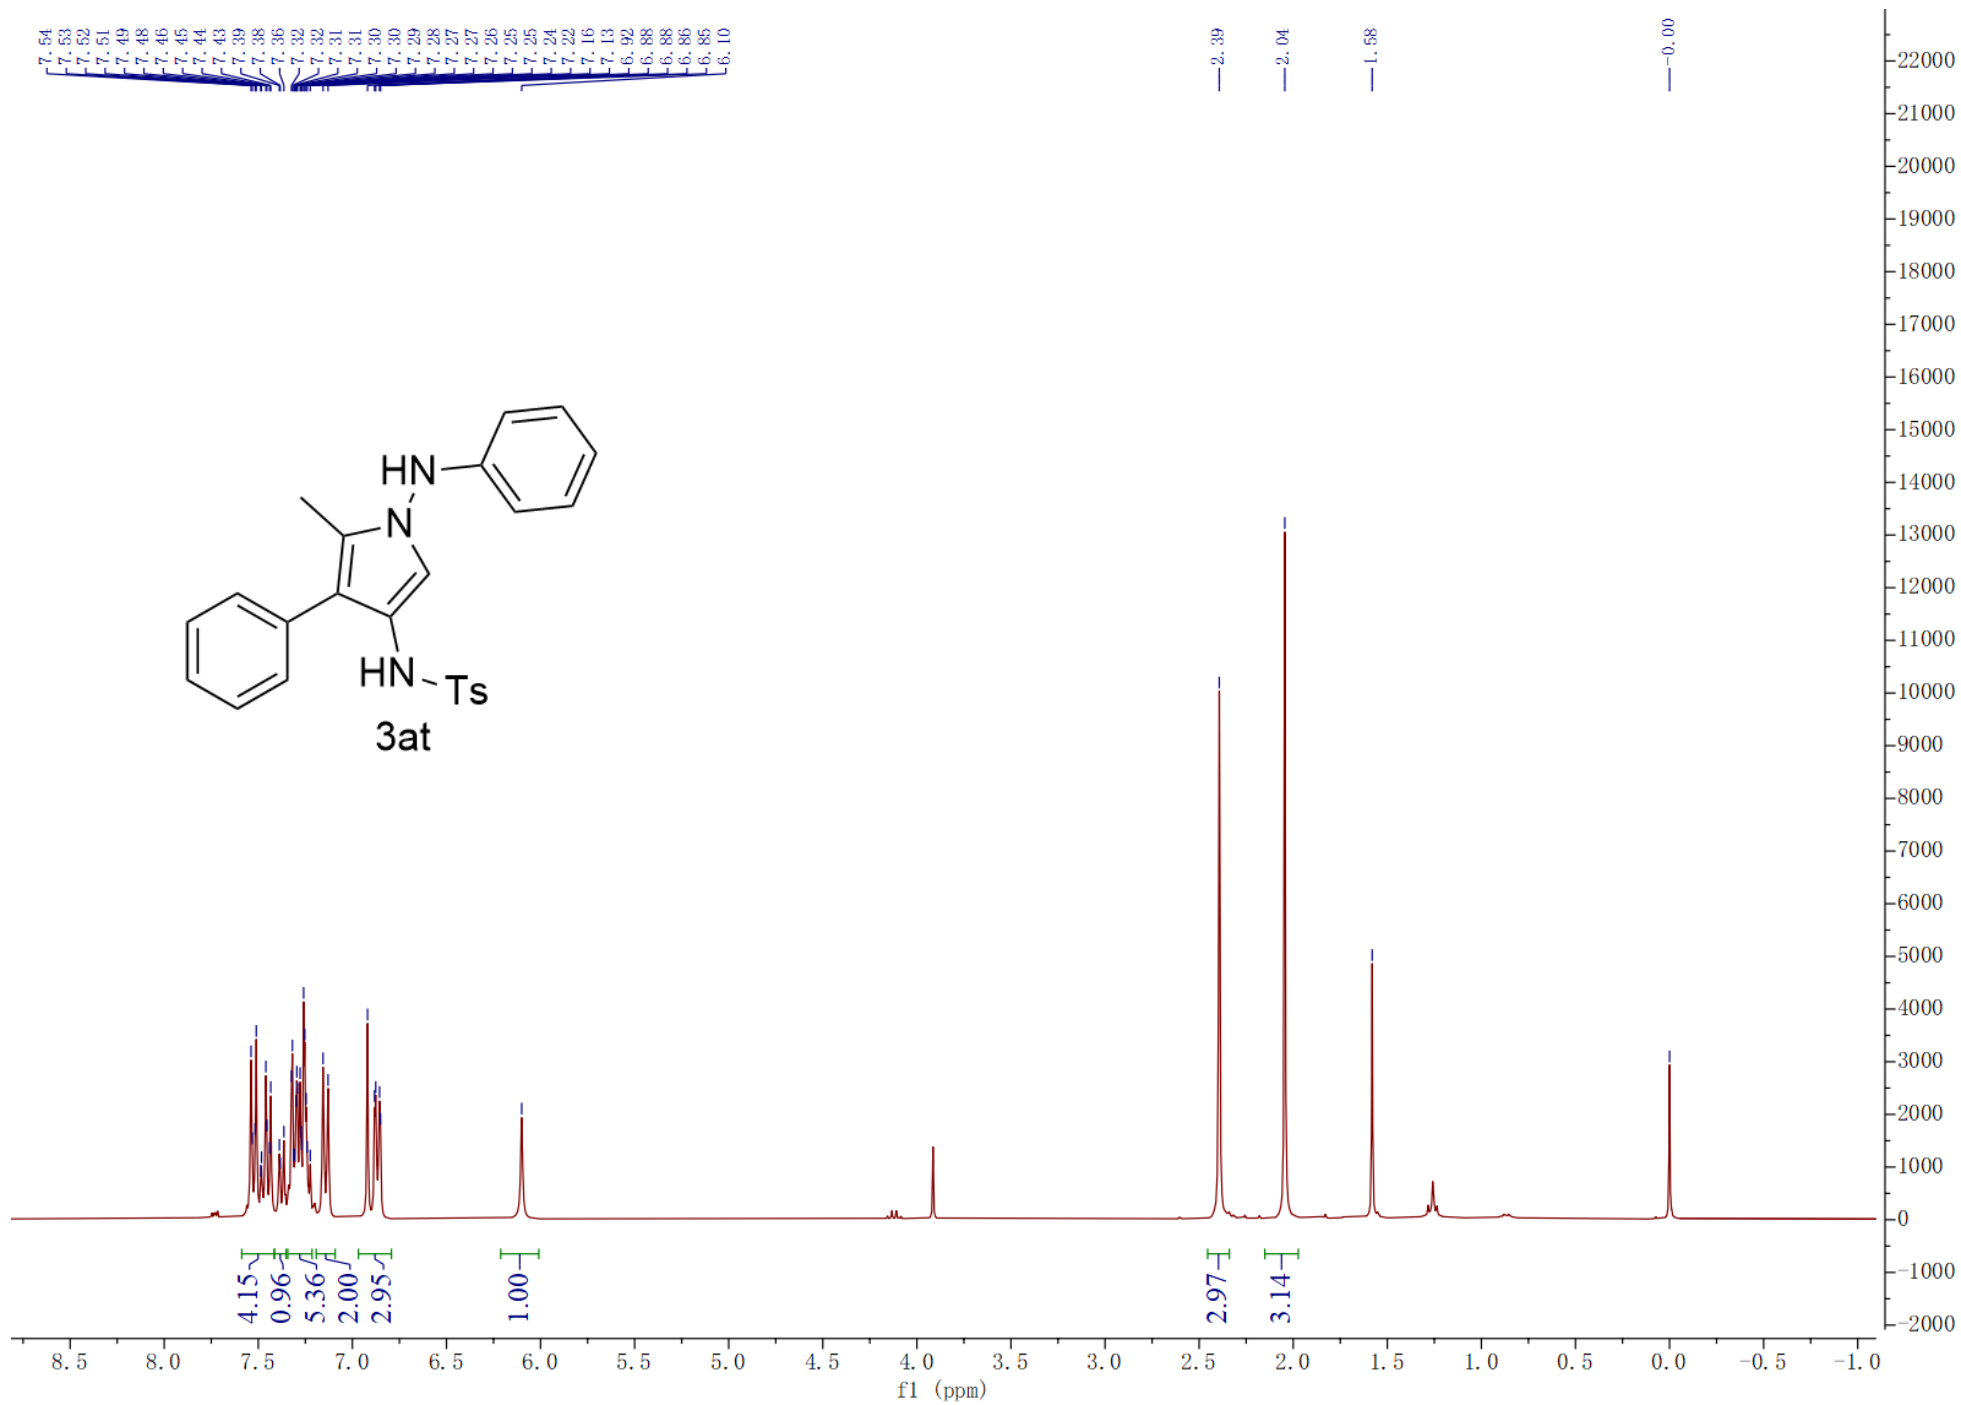

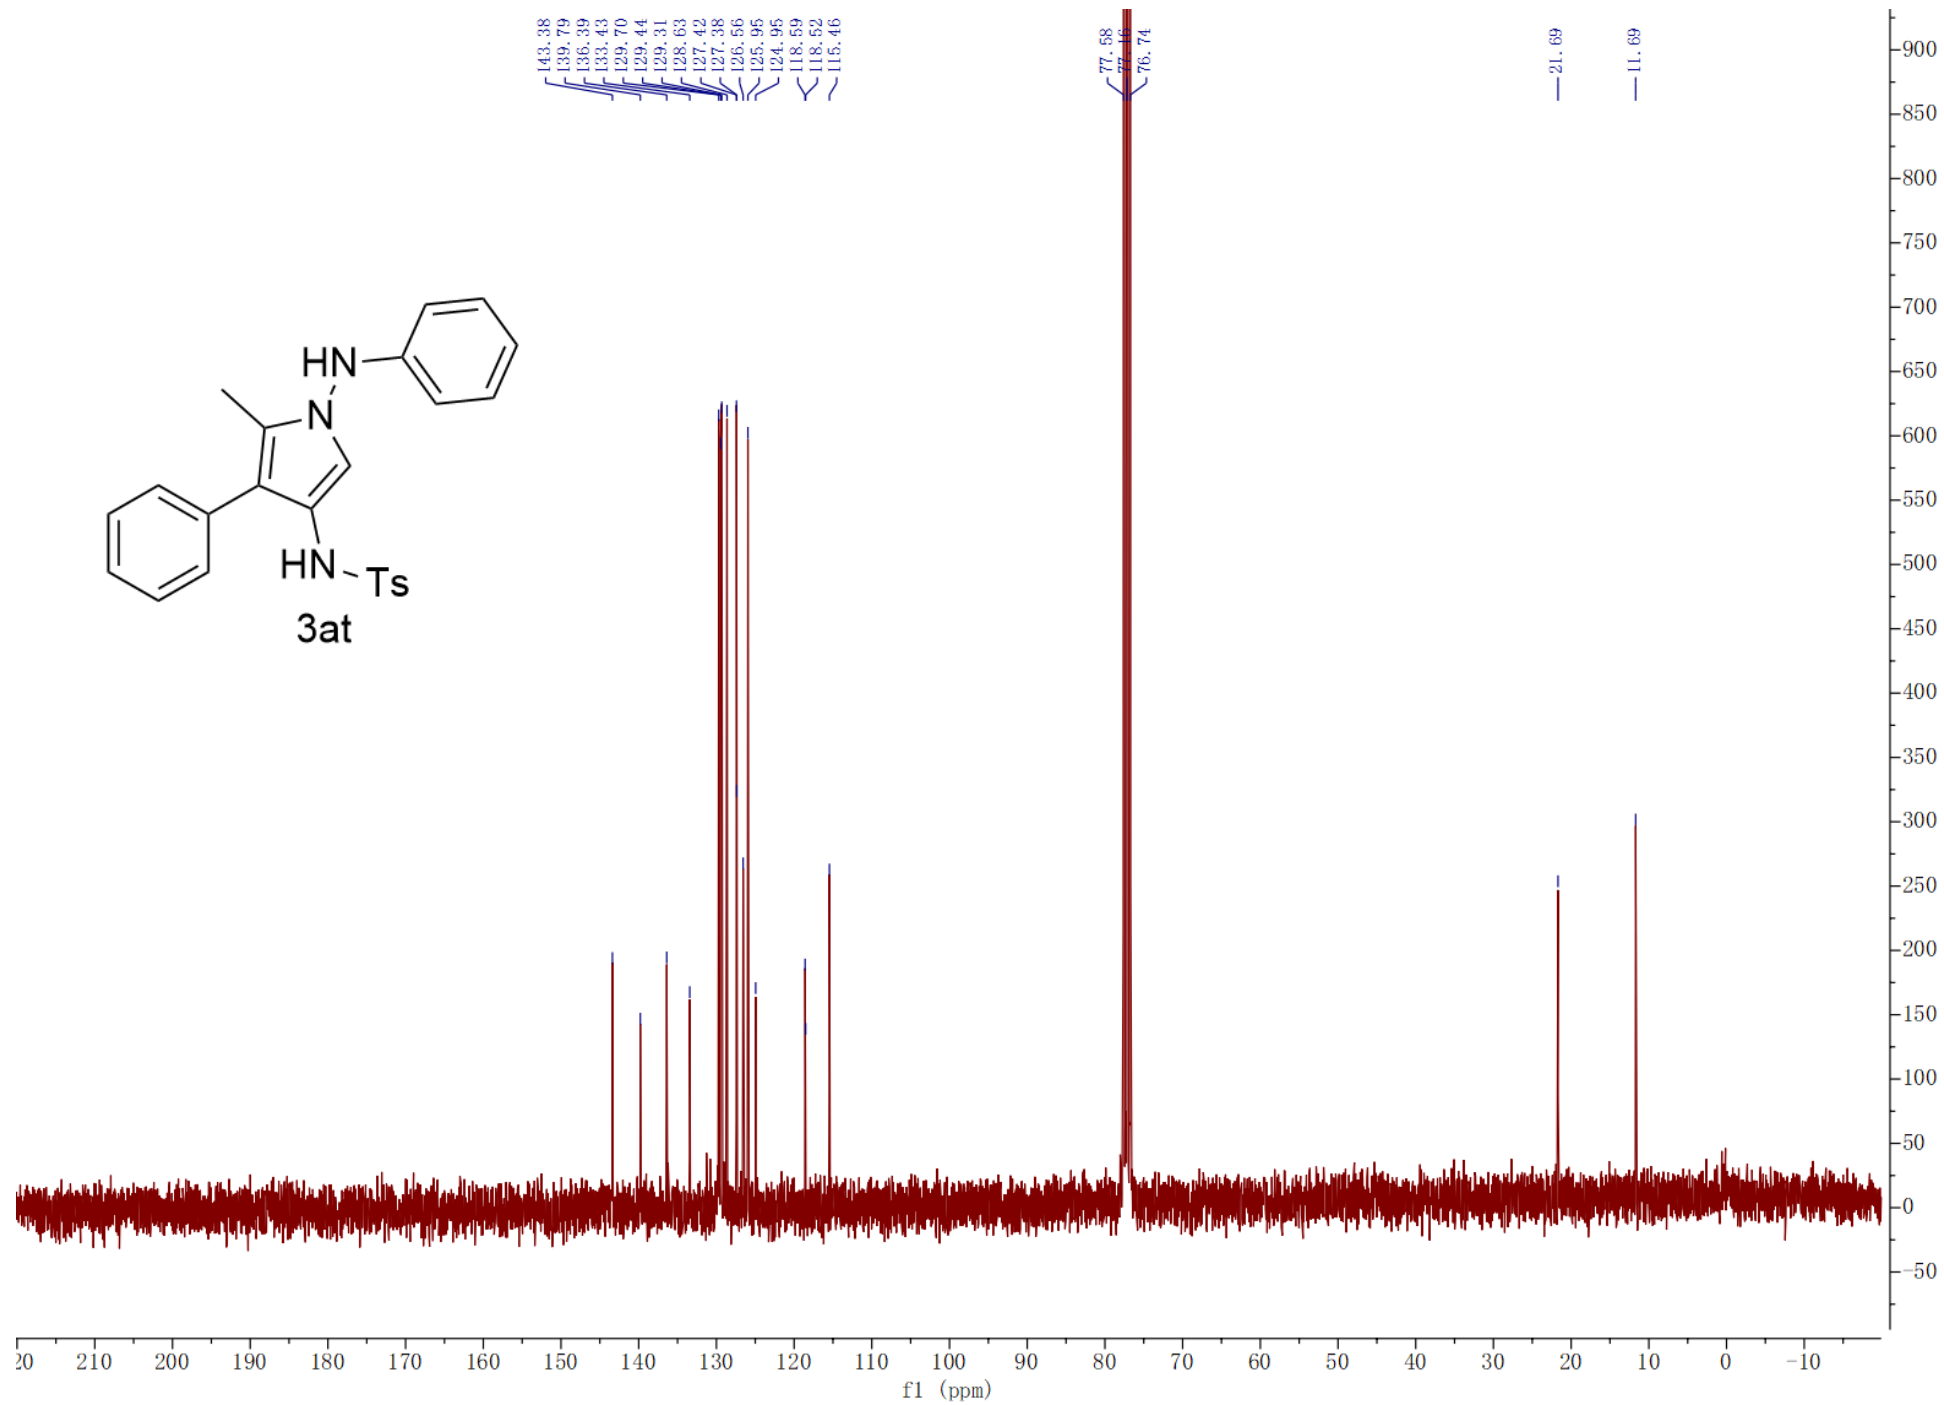

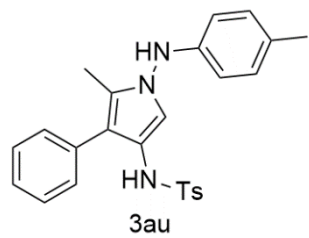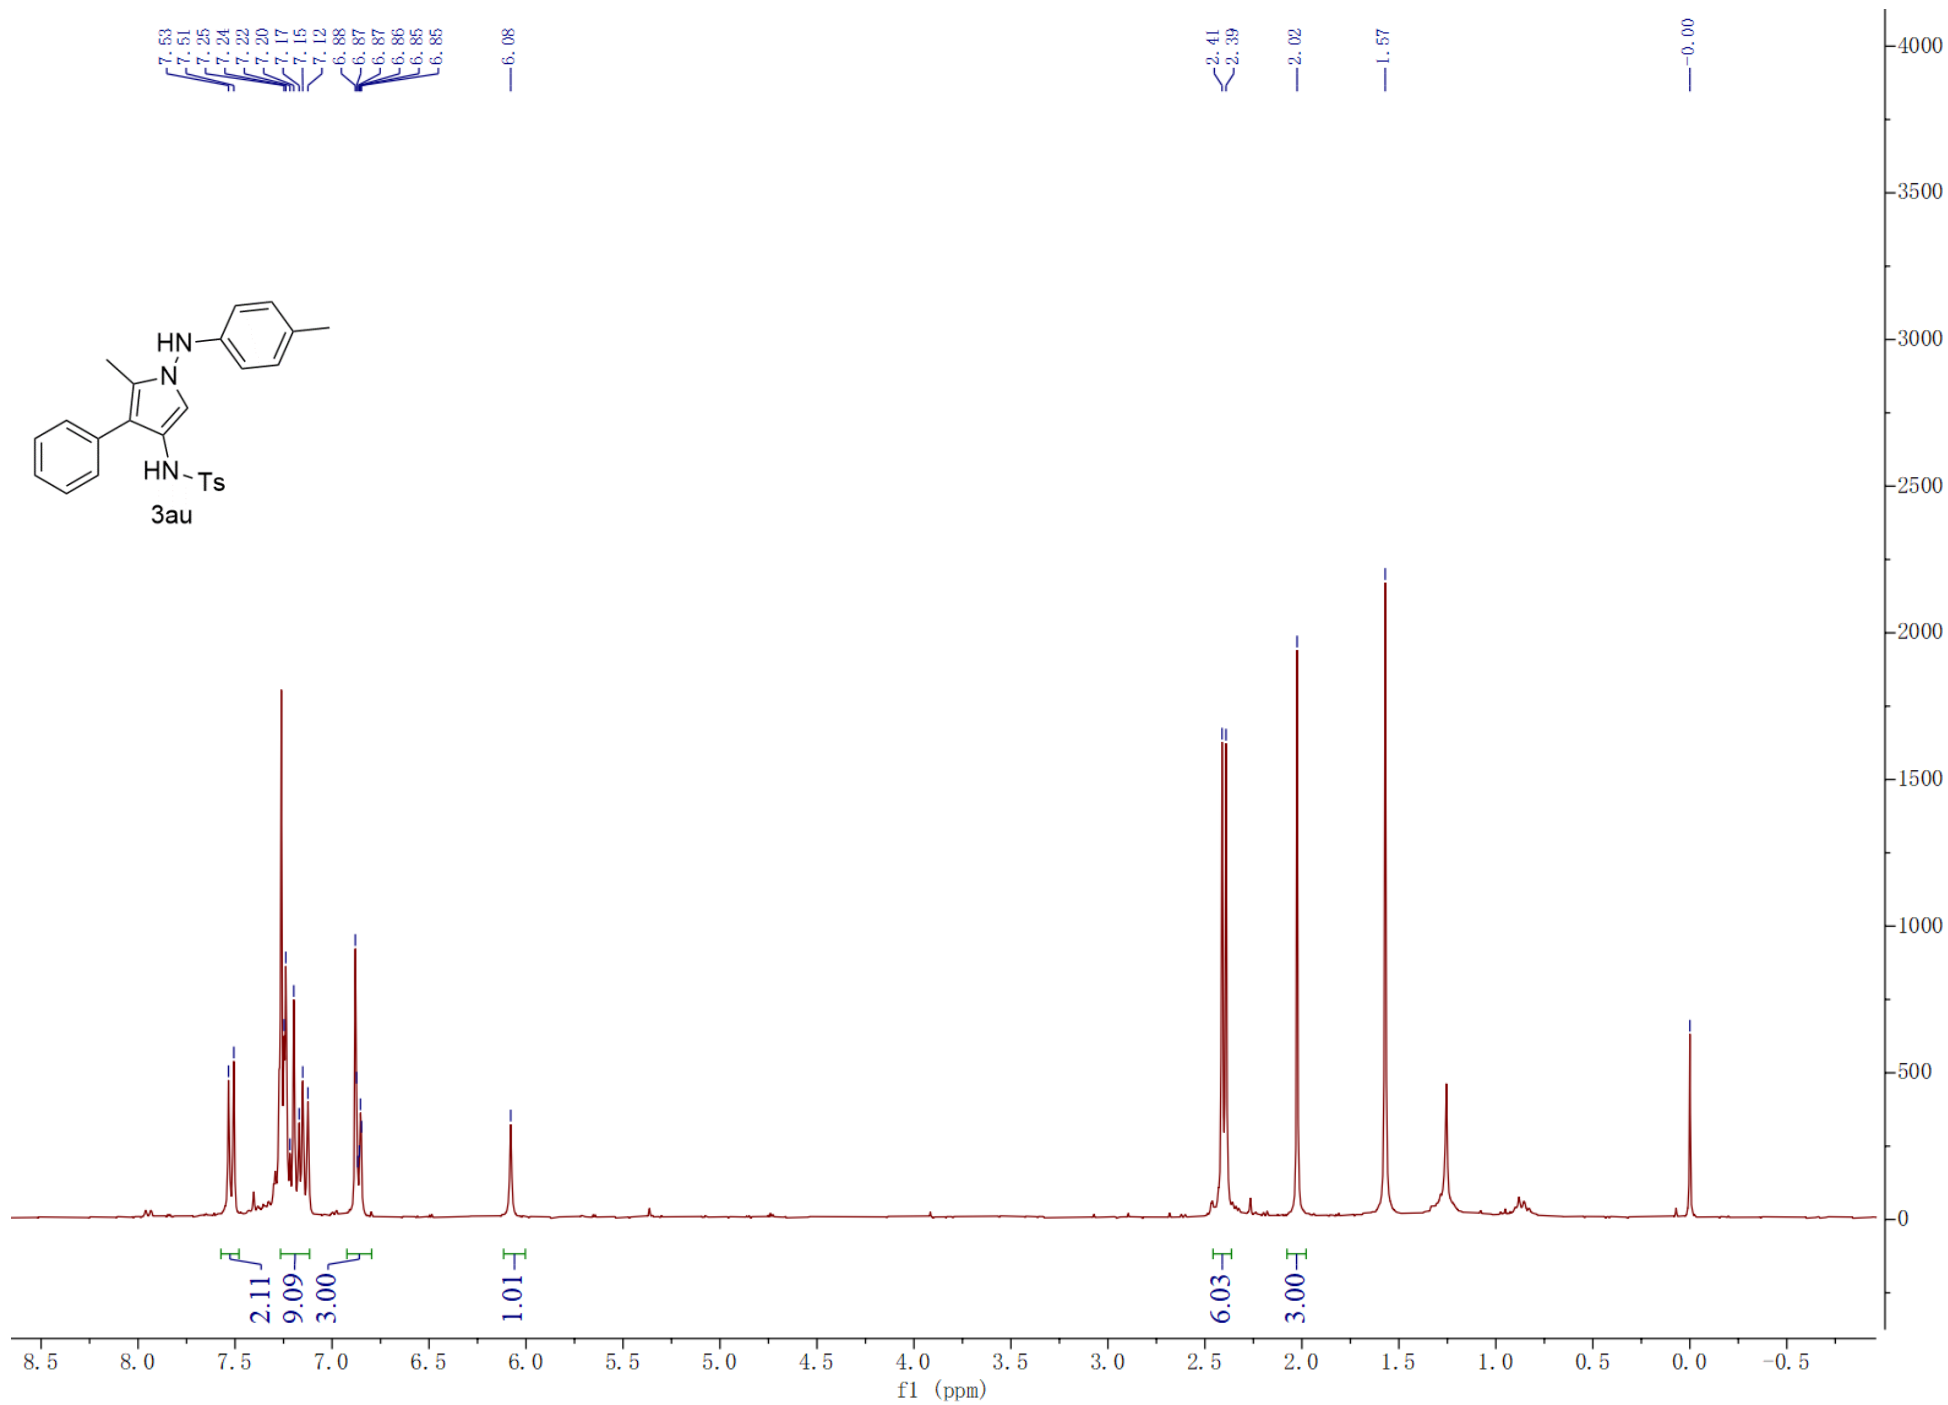

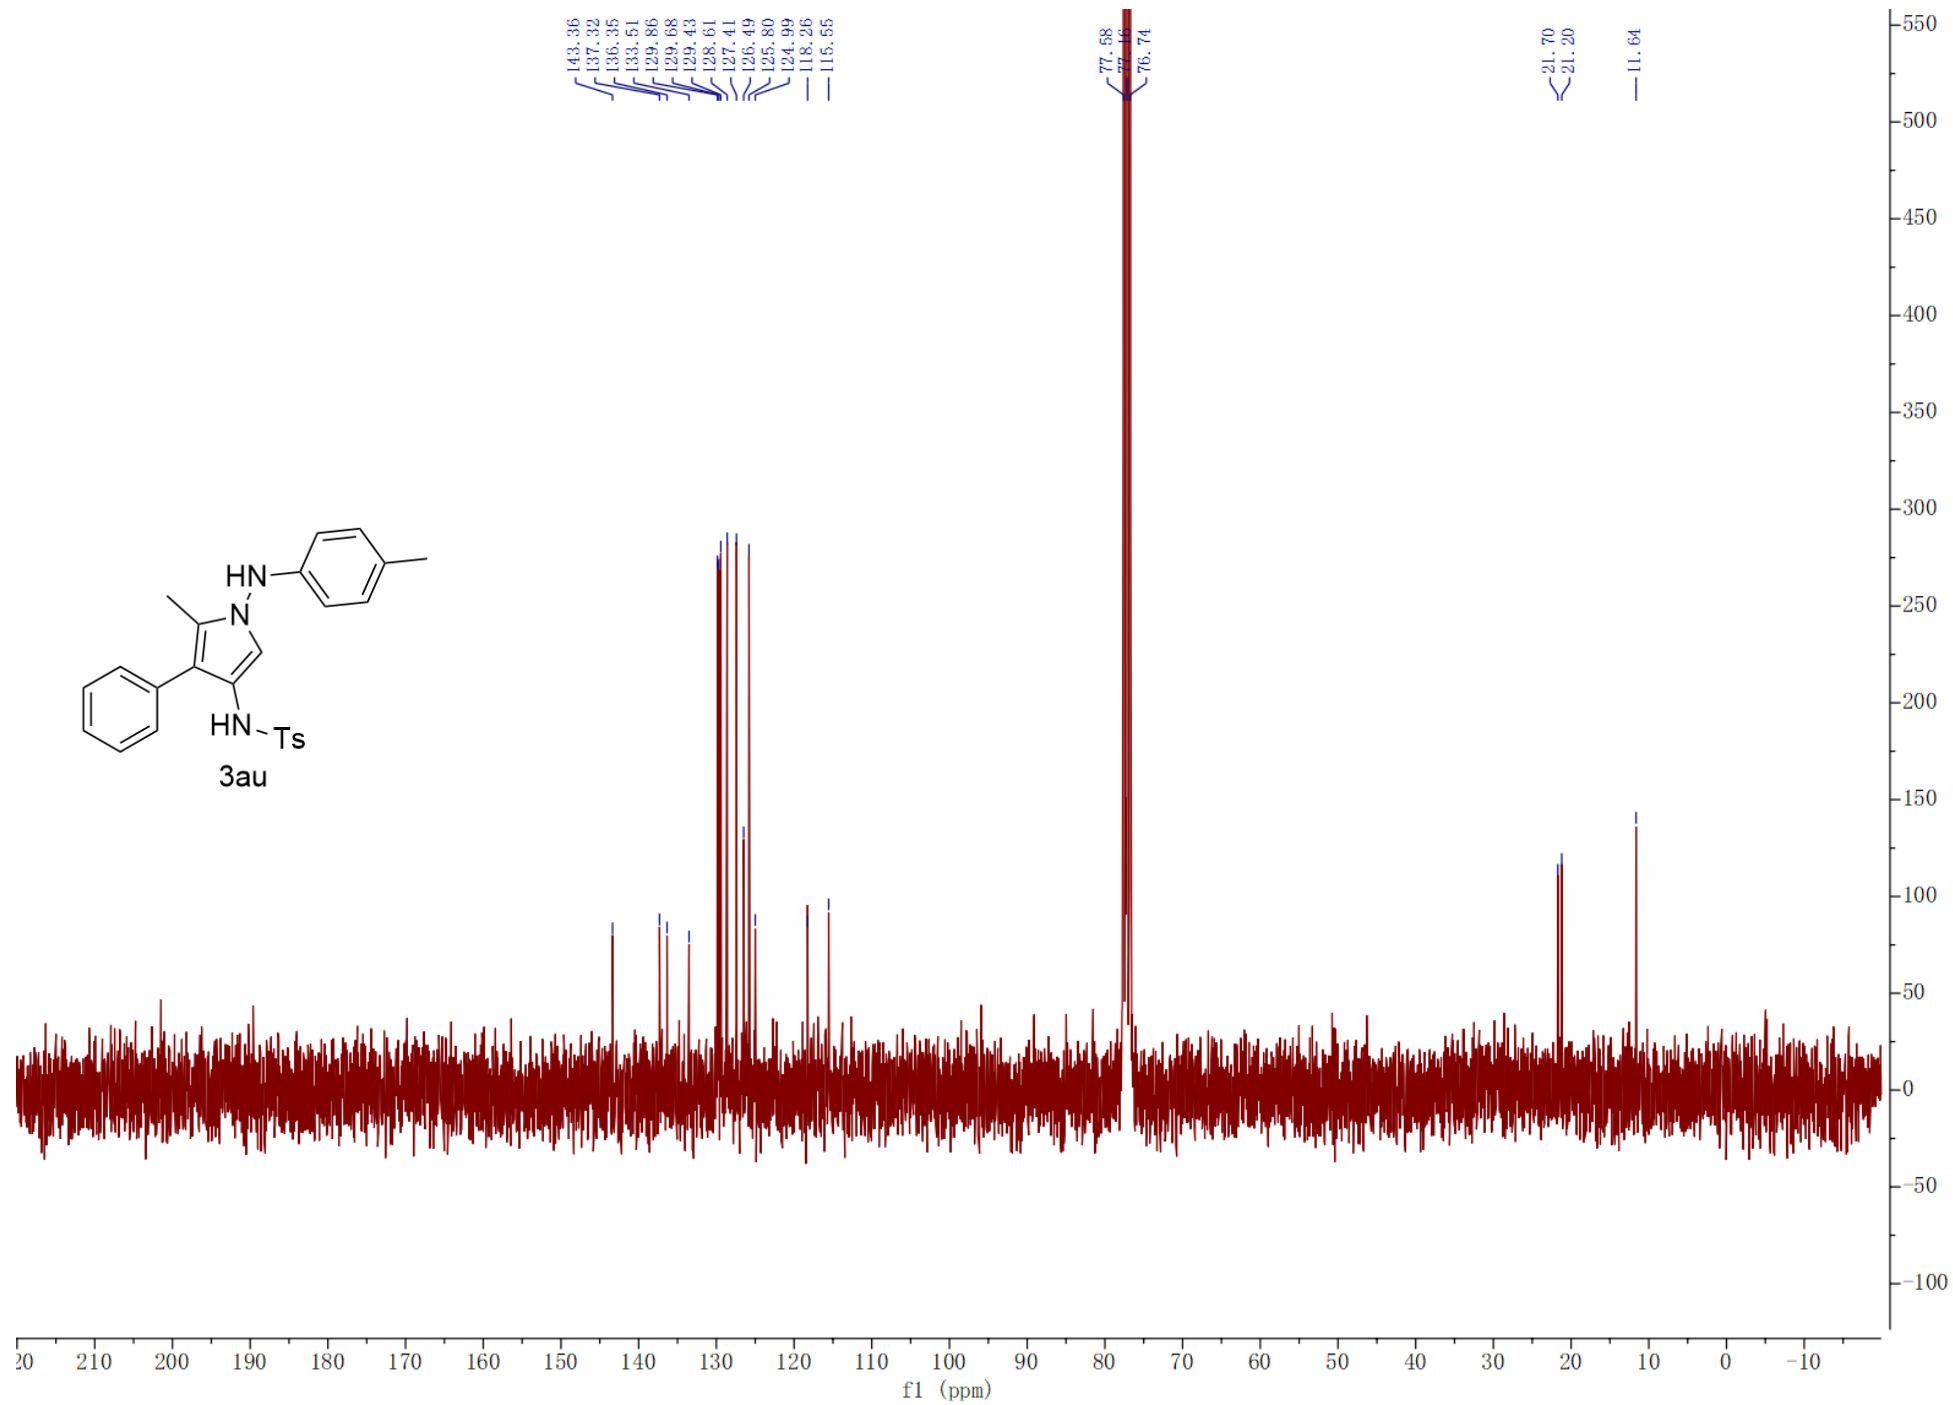

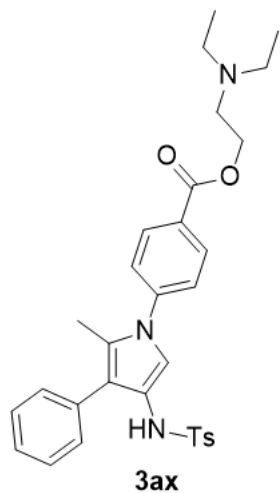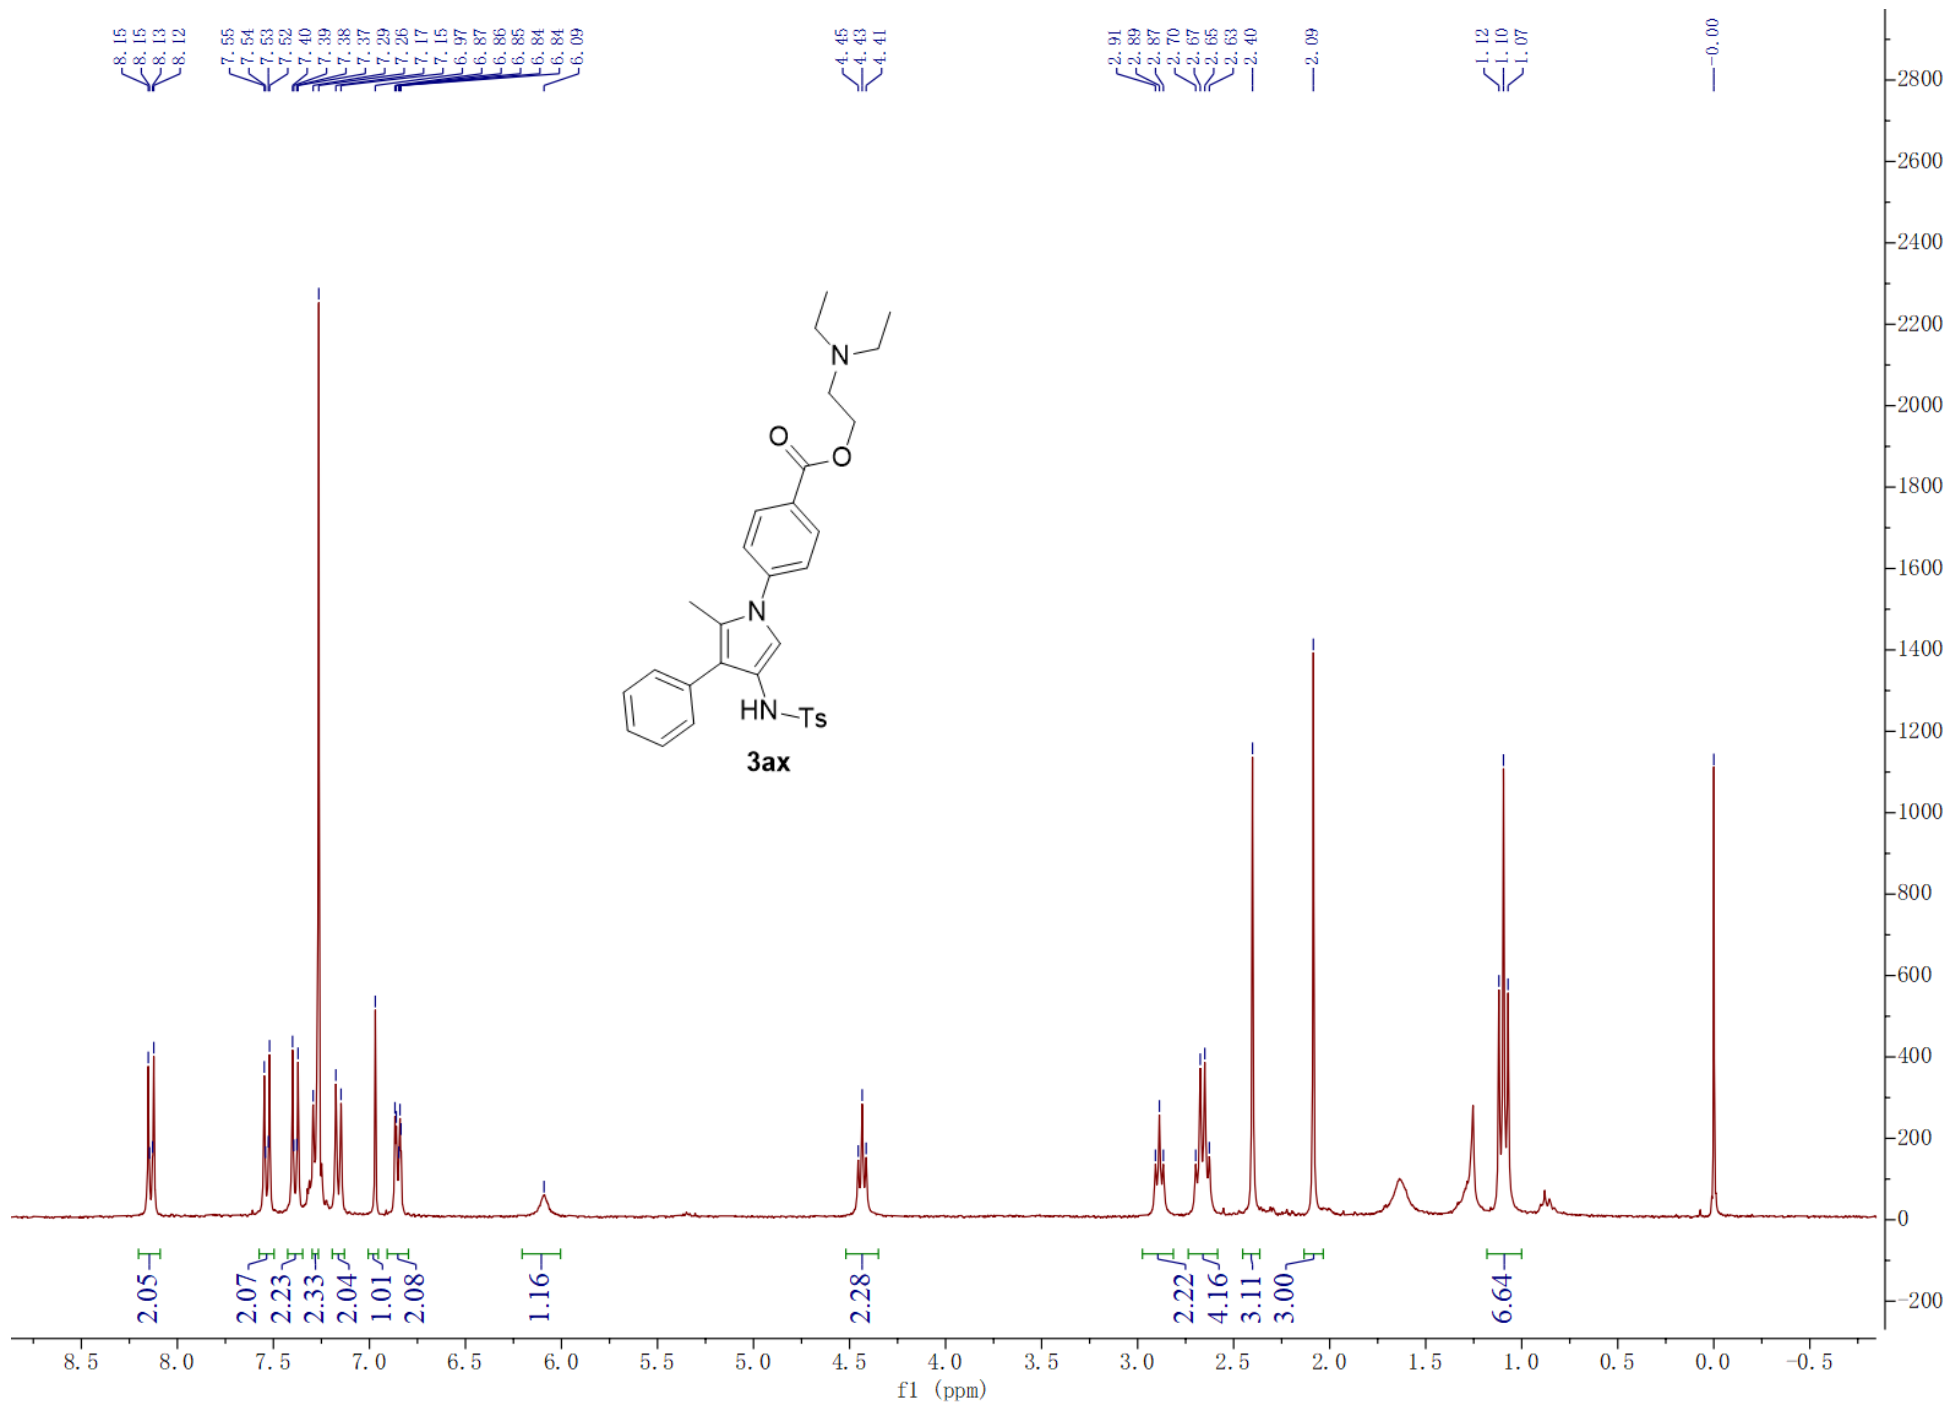

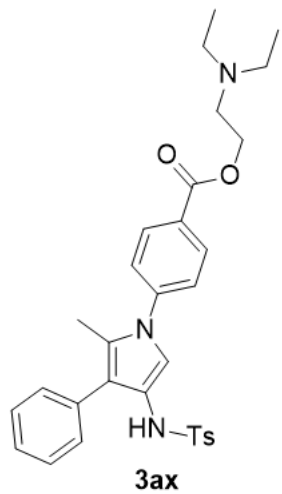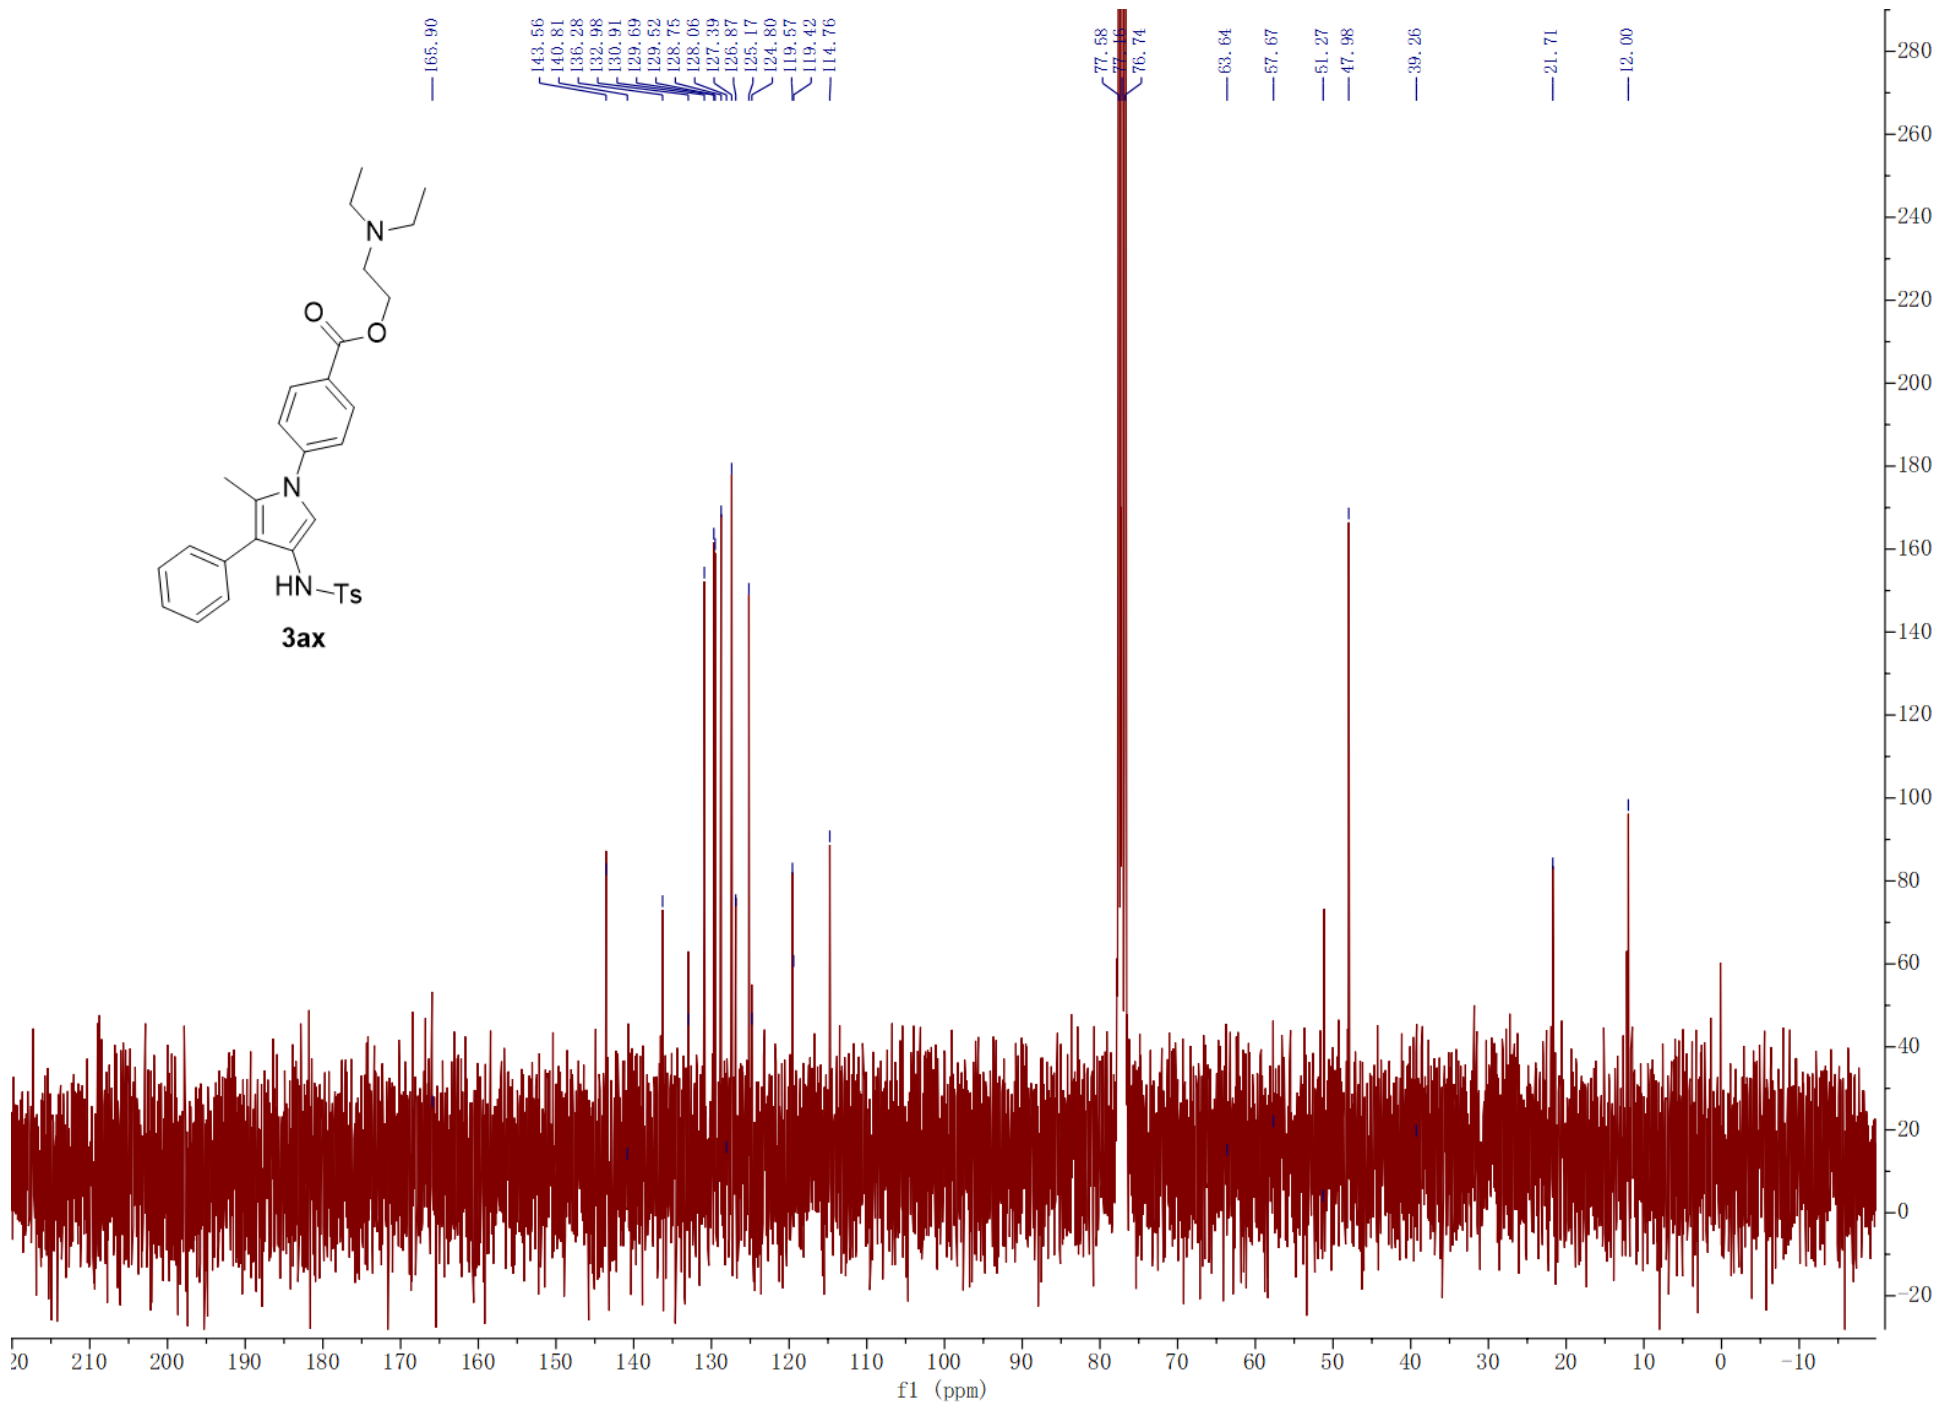

Supplement: d4nj03137g1.pdf [file d4nj03137g1.pdf]
